# Supplementary material
Source: PubMed Central journal article supplement (PMC5525543)

## Electronic Supplementary Information

### Structure–activity studies of non-steroid analogues structurally-related to neuroprotective estrogens<sup>†</sup>

Mingxing Qian,<sup>a</sup> Elizabeth B. Engler-Chiurazzi,<sup>b</sup> Sara E. Lewis,<sup>b</sup> Nigam P. Rath,<sup>c</sup>

James W. Simpkins,<sup>b</sup> and Douglas F. Covey<sup>\*,a,d,e</sup>

<sup>a</sup>*Department of Developmental Biology, Campus Box 8103, Washington University in St. Louis, School of Medicine, 660 S. Euclid Ave., St. Louis, MO, 63110, USA. Email: [dcovey@wustl.edu](mailto:dcovey@wustl.edu); Fax: +1 314 362 7058; Tele: +1 314-362 1726*

<sup>b</sup>*Center for Basic and Translational Stroke Research, West Virginia University, Morgantown, WV 26506, USA*

<sup>c</sup>*Department of Chemistry and Biochemistry and Center for Nanoscience, University of Missouri–St. Louis, St. Louis, MO, 63121, USA*

<sup>d</sup>*Department of Anesthesiology, Washington University School of Medicine, St. Louis, MO, 63110, USA*

<sup>e</sup>*Department of Psychiatry, Washington University School of Medicine, St. Louis MO, 63110.*

Copies of <sup>1</sup>H and <sup>13</sup>C NMR spectra for compounds 27 to 59.

2143

2143-2

300mg minor

| INDEX | FREQUENCY PPM | HEIGHT |
|-------|---------------|--------|-------|---------------|--------|-------|---------------|--------|-------|---------------|--------|
| 1     | 2178.345      | 4.9    | 40    | 536.998       | 1.790  | 6.7   | 282.623       | 0.942  | 79    | 10.5          |        |
| 2     | 1734.975      | 5.782  | 41    | 532.328       | 1.774  | 9.9   | 269.987       | 0.900  | 80    | 10.6          |        |
| 3     | 1188.867      | 3.962  | 42    | 528.757       | 1.762  | 9.4   | 263.669       | 0.879  | 81    | 9.3           |        |
| 4     | 1187.493      | 3.958  | 43    | 519.966       | 1.733  | 9.3   | 258.175       | 0.860  | 82    | 13.7          |        |
| 5     | 1183.098      | 3.943  | 44    | 516.120       | 1.720  | 9.1   | 256.252       | 0.854  | 83    | 14.3          |        |
| 6     | 1181.724      | 3.938  | 45    | 495.243       | 1.651  | 4.5   | 254.054       | 0.847  | 84    | 7.8           |        |
| 7     | 1101.786      | 3.672  | 46    | 489.749       | 1.632  | 6.0   | 251.307       | 0.838  | 85    | 7.3           |        |
| 8     | 1094.094      | 3.646  | 47    | 485.628       | 1.619  | 5.3   | 248.835       | 0.829  | 86    | 8.9           |        |
| 9     | 1092.995      | 3.643  | 48    | 482.057       | 1.607  | 7.3   | 244.989       | 0.817  | 87    | 11.5          |        |
| 10    | 1085.029      | 3.616  | 49    | 477.112       | 1.590  | 6.3   | 230.430       | 0.768  | 88    | 100.0         |        |
| 11    | 725.169       | 2.417  | 50    | 472.443       | 1.575  | 7.9   | 221.090       | 0.737  | 89    | 8.9           |        |
| 12    | 720.774       | 2.402  | 51    | 463.927       | 1.546  | 13.3  |               |        |       |               |        |
| 13    | 714.455       | 2.381  | 52    | 462.004       | 1.540  | 13.5  |               |        |       |               |        |
| 14    | 710.884       | 2.369  | 53    | 459.257       | 1.531  | 16.0  |               |        |       |               |        |
| 15    | 709.236       | 2.364  | 54    | 452.664       | 1.509  | 17.2  |               |        |       |               |        |
| 16    | 704.566       | 2.348  | 55    | 444.148       | 1.480  | 9.0   |               |        |       |               |        |
| 17    | 699.621       | 2.332  | 56    | 441.126       | 1.470  | 9.4   |               |        |       |               |        |
| 18    | 697.973       | 2.326  | 57    | 433.160       | 1.444  | 8.1   |               |        |       |               |        |
| 19    | 693.029       | 2.310  | 58    | 429.864       | 1.433  | 7.4   |               |        |       |               |        |
| 20    | 684.788       | 2.282  | 59    | 425.468       | 1.418  | 6.6   |               |        |       |               |        |
| 21    | 679.843       | 2.266  | 60    | 421.897       | 1.406  | 5.8   |               |        |       |               |        |
| 22    | 676.546       | 2.255  | 61    | 419.700       | 1.399  | 5.9   |               |        |       |               |        |
| 23    | 668.580       | 2.228  | 62    | 417.777       | 1.392  | 5.8   |               |        |       |               |        |
| 24    | 663.635       | 2.212  | 63    | 412.008       | 1.373  | 7.5   |               |        |       |               |        |
| 25    | 632.319       | 2.107  | 64    | 401.569       | 1.338  | 9.1   |               |        |       |               |        |
| 26    | 627.375       | 2.091  | 65    | 394.702       | 1.315  | 13.4  |               |        |       |               |        |
| 27    | 622.705       | 2.075  | 66    | 390.581       | 1.302  | 13.9  |               |        |       |               |        |
| 28    | 618.584       | 2.062  | 67    | 388.109       | 1.293  | 13.5  |               |        |       |               |        |
| 29    | 613.914       | 2.046  | 68    | 380.967       | 1.270  | 12.9  |               |        |       |               |        |
| 30    | 609.244       | 2.030  | 69    | 374.099       | 1.247  | 14.1  |               |        |       |               |        |
| 31    | 604.574       | 2.015  | 70    | 366.407       | 1.221  | 10.9  |               |        |       |               |        |
| 32    | 601.278       | 2.004  | 71    | 350.475       | 1.168  | 4.6   |               |        |       |               |        |
| 33    | 597.707       | 1.992  | 72    | 339.212       | 1.131  | 8.1   |               |        |       |               |        |
| 34    | 555.403       | 1.851  | 73    | 331.245       | 1.104  | 9.7   |               |        |       |               |        |
| 35    | 552.381       | 1.841  | 74    | 327.949       | 1.093  | 10.4  |               |        |       |               |        |
| 36    | 549.909       | 1.833  | 75    | 322.455       | 1.075  | 9.5   |               |        |       |               |        |
| 37    | 546.887       | 1.823  | 76    | 312.566       | 1.042  | 5.6   |               |        |       |               |        |
| 38    | 542.492       | 1.808  | 77    | 301.028       | 1.003  | 3.1   |               |        |       |               |        |
| 39    | 539.470       | 1.798  | 78    | 294.710       | 0.982  | 5.7   |               |        |       |               |        |

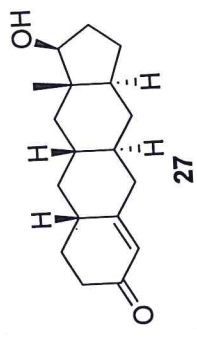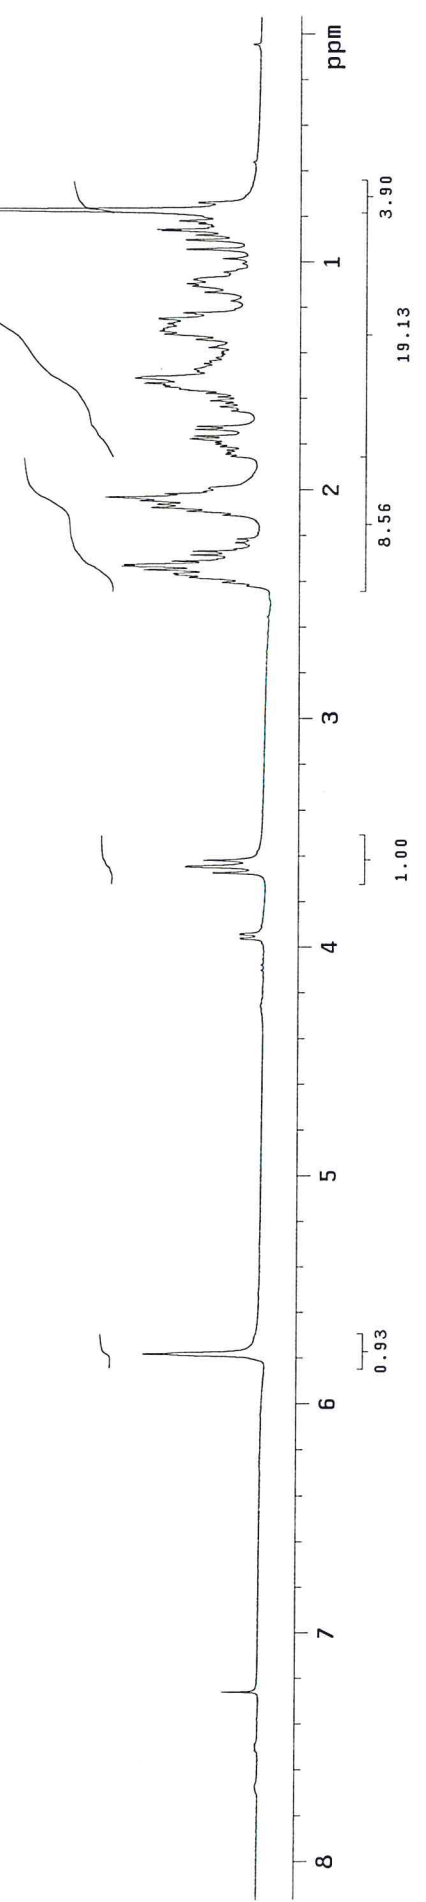

| INDEX | FREQUENCY | PPM     | HEIGHT |
|-------|-----------|---------|--------|
| 1     | 15121.172 | 200.421 | 6.8    |
| 2     | 12592.581 | 166.906 | 8.8    |
| 3     | 9395.198  | 124.527 | 25.0   |
| 4     | 6157.732  | 81.617  | 24.7   |
| 5     | 5857.691  | 77.640  | 18.7   |
| 6     | 5825.626  | 77.215  | 19.4   |
| 7     | 5793.560  | 76.790  | 19.0   |
| 8     | 3386.361  | 44.884  | 21.6   |
| 9     | 3350.860  | 44.413  | 27.2   |
| 10    | 3305.052  | 43.806  | 25.4   |
| 11    | 3293.600  | 43.654  | 13.5   |
| 12    | 3213.436  | 42.592  | 27.1   |
| 13    | 3157.322  | 41.848  | 26.6   |
| 14    | 2871.023  | 38.054  | 21.1   |
| 15    | 2829.796  | 37.507  | 25.7   |
| 16    | 2775.972  | 36.794  | 24.5   |
| 17    | 2473.640  | 32.786  | 26.4   |
| 18    | 2304.152  | 30.540  | 29.5   |
| 19    | 2207.955  | 29.265  | 26.7   |
| 20    | 1915.931  | 25.394  | 26.6   |
| 21    | 863.497   | 11.445  | 21.8   |

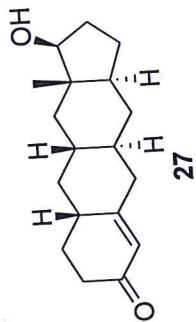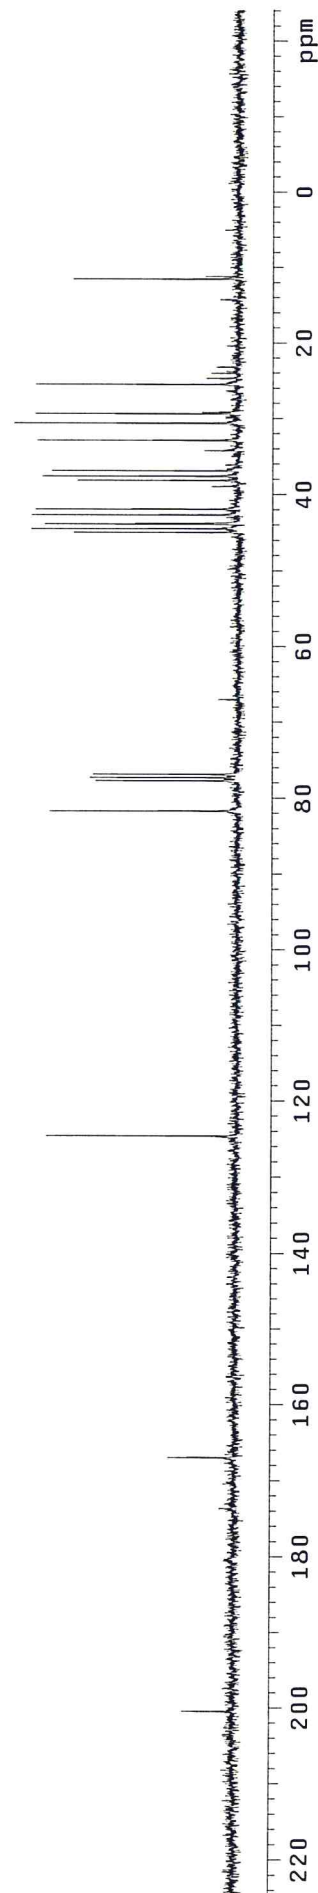

2153 (28)

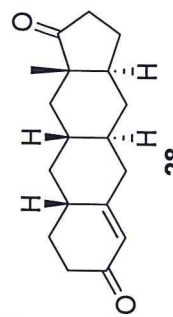

| INDEX | FREQUENCY PPM | HEIGHT | INDEX | FREQUENCY PPM | HEIGHT |
|-------|---------------|--------|-------|---------------|--------|
| 1     | 2178.345      | 1.6    | 40    | 469.970       | 11.5   |
| 2     | 1711.900      | 17.7   | 41    | 462.553       | 16.6   |
| 3     | 719.400       | 3.8    | 42    | 459.806       | 16.0   |
| 4     | 710.884       | 6.7    | 43    | 452.664       | 7.9    |
| 5     | 706.764       | 9.0    | 44    | 447.719       | 9.3    |
| 6     | 703.467       | 10.3   | 45    | 444.423       | 7.7    |
| 7     | 697.149       | 11.4   | 46    | 439.753       | 5.4    |
| 8     | 692.204       | 20.9   | 47    | 434.259       | 6.9    |
| 9     | 685.337       | 10.1   | 48    | 424.644       | 2.6    |
| 10    | 680.942       | 13.4   | 49    | 421.623       | 3.0    |
| 11    | 675.997       | 11.9   | 50    | 376.846       | 2.1    |
| 12    | 670.778       | 8.2    | 51    | 366.407       | 5.4    |
| 13    | 662.537       | 7.5    | 52    | 354.870       | 7.1    |
| 14    | 658.965       | 2.196  | 53    | 346.904       | 2.7    |
| 15    | 657.592       | 2.192  | 54    | 345.530       | 4.0    |
| 16    | 654.570       | 3.0    | 55    | 343.332       | 4.3    |
| 17    | 646.329       | 2.154  | 56    | 338.388       | 4.0    |
| 18    | 641.385       | 2.138  | 57    | 327.400       | 5.5    |
| 19    | 619.958       | 2.066  | 58    | 315.313       | 4.3    |
| 20    | 611.442       | 2.038  | 59    | 304.050       | 1.6    |
| 21    | 606.497       | 2.021  | 60    | 283.447       | 11.0   |
| 22    | 602.102       | 2.007  | 61    | 271.086       | 19.9   |
| 23    | 599.080       | 1.997  | 62    | 258.724       | 13.5   |
| 24    | 593.037       | 1.976  | 63    | 247.736       | 100.0  |
| 25    | 588.092       | 1.960  |       |               |        |
| 26    | 580.950       | 1.936  |       |               |        |
| 27    | 551.557       | 1.838  |       |               |        |
| 28    | 544.140       | 1.814  |       |               |        |
| 29    | 538.921       | 1.796  |       |               |        |
| 30    | 534.800       | 1.782  |       |               |        |
| 31    | 531.504       | 1.771  |       |               |        |
| 32    | 526.010       | 1.753  |       |               |        |
| 33    | 509.802       | 1.699  |       |               |        |
| 34    | 506.231       | 1.687  |       |               |        |
| 35    | 496.891       | 1.656  |       |               |        |
| 36    | 493.045       | 1.643  |       |               |        |
| 37    | 478.486       | 1.595  |       |               |        |
| 38    | 477.112       | 1.590  |       |               |        |
| 39    | 472.717       | 1.575  |       |               |        |

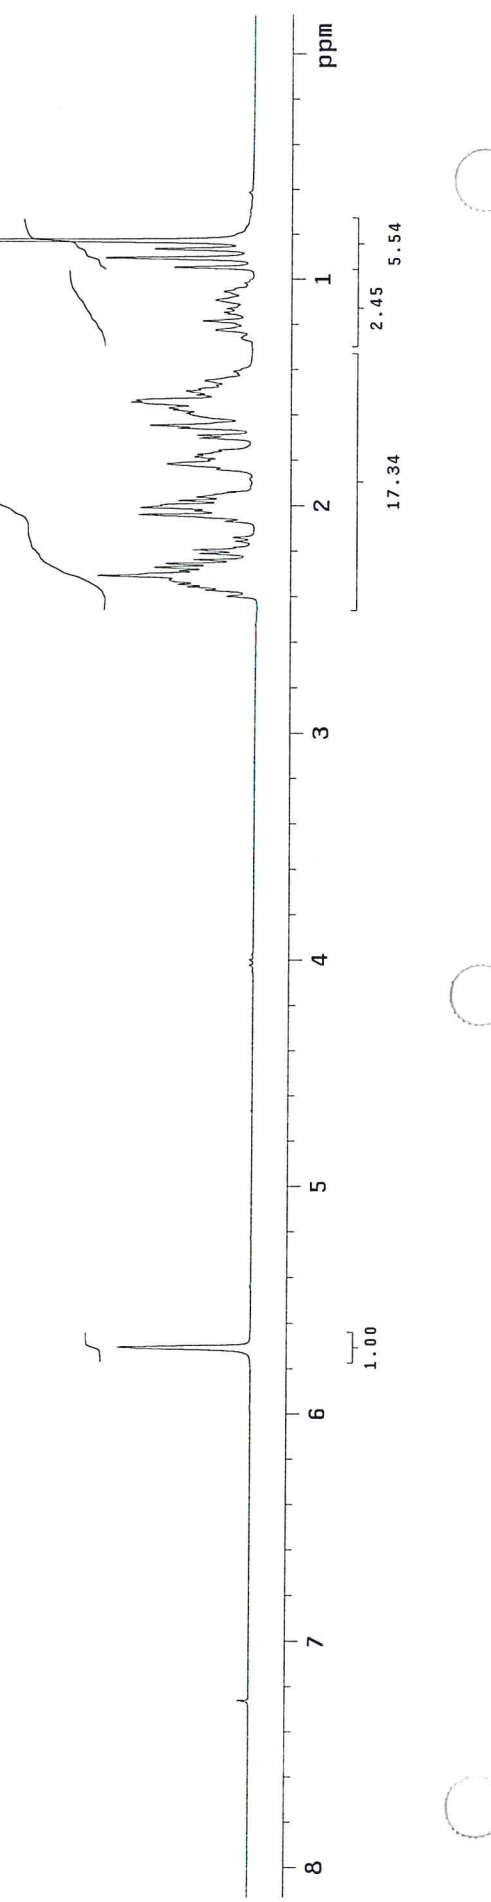

2153

| INDEX | FREQUENCY | PPM     | HEIGHT |
|-------|-----------|---------|--------|
| 1     | 16577.687 | 219.726 | 11.9   |
| 2     | 15058.013 | 199.584 | 17.0   |
| 3     | 12490.486 | 165.553 | 19.2   |
| 4     | 9378.992  | 124.312 | 46.6   |
| 5     | 5840.340  | 77.410  | 12.8   |
| 6     | 5808.275  | 76.985  | 12.7   |
| 7     | 5776.209  | 76.560  | 12.9   |
| 8     | 3609.501  | 47.842  | 26.3   |
| 9     | 3399.930  | 45.064  | 38.4   |
| 10    | 3308.315  | 43.850  | 50.0   |
| 11    | 3159.439  | 41.876  | 39.2   |
| 12    | 3095.308  | 41.026  | 44.3   |
| 13    | 2869.705  | 38.036  | 37.5   |
| 14    | 2827.333  | 37.474  | 48.0   |
| 15    | 2776.944  | 36.807  | 41.8   |
| 16    | 2747.169  | 36.412  | 42.2   |
| 17    | 2668.151  | 35.365  | 47.4   |
| 18    | 2407.046  | 31.904  | 49.4   |
| 19    | 2173.427  | 28.807  | 42.6   |
| 20    | 1774.899  | 23.525  | 46.6   |
| 21    | 1012.199  | 13.416  | 43.8   |

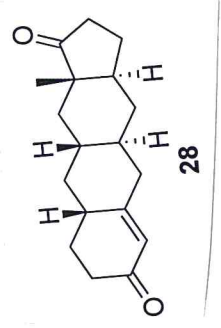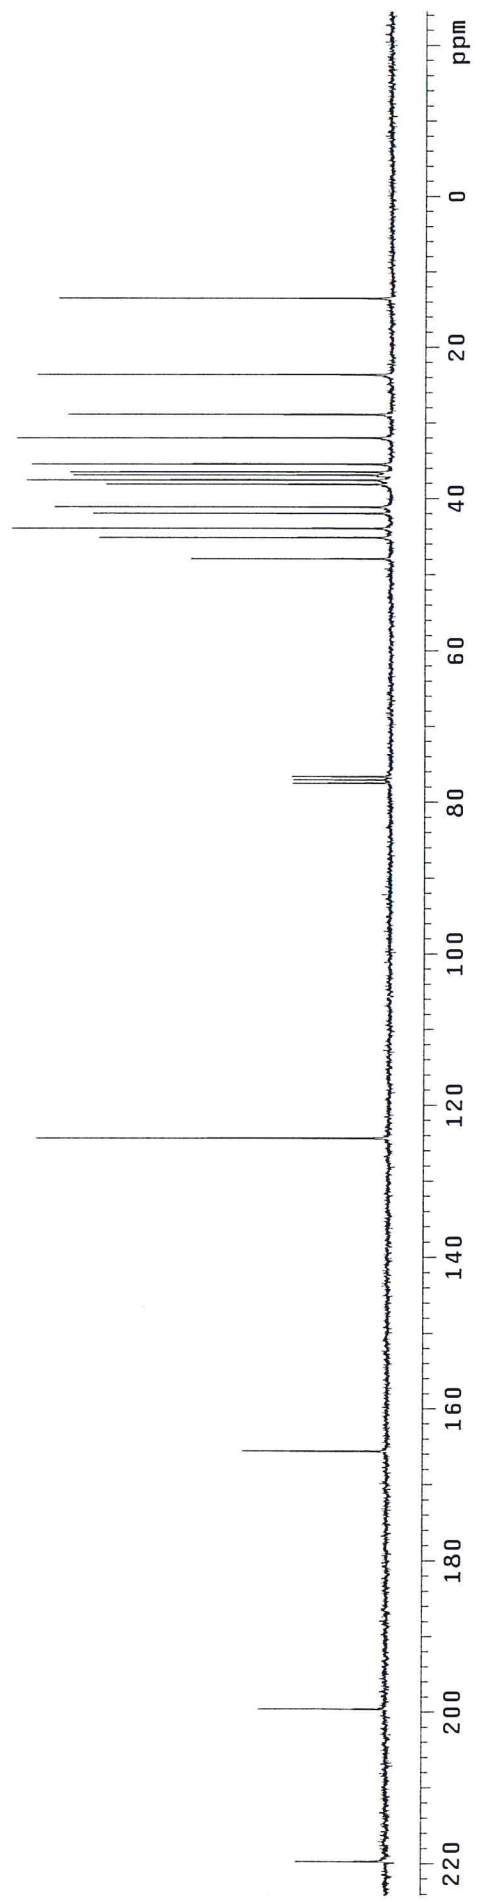

| INDEX | FREQUENCY | HEIGHT | INDEX | FREQUENCY | HEIGHT | INDEX | FREQUENCY | HEIGHT |
|-------|-----------|--------|-------|-----------|--------|-------|-----------|--------|
| 1     | 1049.913  | 3.499  | 40    | 475.235   | 1.584  | 2.7   | 475.235   | 1.584  |
| 2     | 1041.672  | 3.472  | 41    | 473.312   | 1.577  | 2.7   | 473.312   | 1.577  |
| 3     | 1033.705  | 3.445  | 42    | 469.741   | 1.566  | 1.8   | 469.741   | 1.566  |
| 4     | 728.786   | 2.429  | 43    | 465.346   | 1.551  | 1.6   | 465.346   | 1.551  |
| 5     | 725.489   | 2.418  | 44    | 462.050   | 1.540  | 1.5   | 462.050   | 1.540  |
| 6     | 721.918   | 2.406  | 45    | 445.018   | 1.483  | 1.1   | 445.018   | 1.483  |
| 7     | 715.875   | 2.386  | 46    | 440.623   | 1.469  | 2.3   | 440.623   | 1.469  |
| 8     | 709.007   | 2.363  | 47    | 433.755   | 1.446  | 2.8   | 433.755   | 1.446  |
| 9     | 702.139   | 2.340  | 48    | 427.712   | 1.425  | 4.0   | 427.712   | 1.425  |
| 10    | 694.997   | 2.316  | 49    | 422.218   | 1.407  | 3.5   | 422.218   | 1.407  |
| 11    | 686.756   | 2.289  | 50    | 415.350   | 1.384  | 2.5   | 415.350   | 1.384  |
| 12    | 685.108   | 2.283  | 51    | 409.307   | 1.364  | 1.3   | 409.307   | 1.364  |
| 13    | 612.312   | 2.041  | 52    | 384.858   | 1.283  | 1.1   | 384.858   | 1.283  |
| 14    | 611.488   | 2.038  | 53    | 377.716   | 1.259  | 1.9   | 377.716   | 1.259  |
| 15    | 606.818   | 2.022  | 54    | 376.617   | 1.255  | 1.6   | 376.617   | 1.255  |
| 16    | 604.620   | 2.015  | 55    | 370.574   | 1.235  | 1.3   | 370.574   | 1.235  |
| 17    | 600.774   | 2.002  | 56    | 369.475   | 1.231  | 1.2   | 369.475   | 1.231  |
| 18    | 597.753   | 1.992  | 57    | 362.882   | 1.209  | 1.1   | 362.882   | 1.209  |
| 19    | 595.830   | 1.986  | 58    | 361.234   | 1.204  | 1.4   | 361.234   | 1.204  |
| 20    | 590.895   | 1.969  | 59    | 360.135   | 1.200  | 1.5   | 360.135   | 1.200  |
| 21    | 589.511   | 1.965  | 60    | 359.311   | 1.198  | 1.5   | 359.311   | 1.198  |
| 22    | 587.314   | 1.957  | 61    | 356.838   | 1.189  | 1.8   | 356.838   | 1.189  |
| 23    | 582.919   | 1.943  | 62    | 353.817   | 1.179  | 2.3   | 353.817   | 1.179  |
| 24    | 581.820   | 1.939  | 63    | 349.696   | 1.165  | 6.9   | 349.696   | 1.165  |
| 25    | 576.051   | 1.920  | 64    | 348.872   | 1.163  | 6.7   | 348.872   | 1.163  |
| 26    | 574.678   | 1.915  | 65    | 343.653   | 1.145  | 114.6 | 343.653   | 1.145  |
| 27    | 526.605   | 1.755  | 66    | 342.554   | 1.142  | 88.1  | 342.554   | 1.142  |
| 28    | 519.737   | 1.732  | 67    | 292.558   | 0.975  | 33.5  | 292.558   | 0.975  |
| 29    | 511.496   | 1.705  |       |           |        |       |           |        |
| 30    | 509.024   | 1.696  |       |           |        |       |           |        |
| 31    | 501.607   | 1.672  |       |           |        |       |           |        |
| 32    | 495.014   | 1.650  |       |           |        |       |           |        |
| 33    | 492.267   | 1.641  |       |           |        |       |           |        |
| 34    | 491.443   | 1.638  |       |           |        |       |           |        |
| 35    | 486.773   | 1.622  |       |           |        |       |           |        |
| 36    | 484.026   | 1.613  |       |           |        |       |           |        |
| 37    | 483.202   | 1.610  |       |           |        |       |           |        |
| 38    | 482.103   | 1.607  |       |           |        |       |           |        |
| 39    | 476.883   | 1.589  |       |           |        |       |           |        |

NO 10/17 10/16

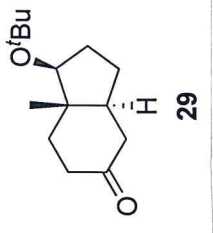

29

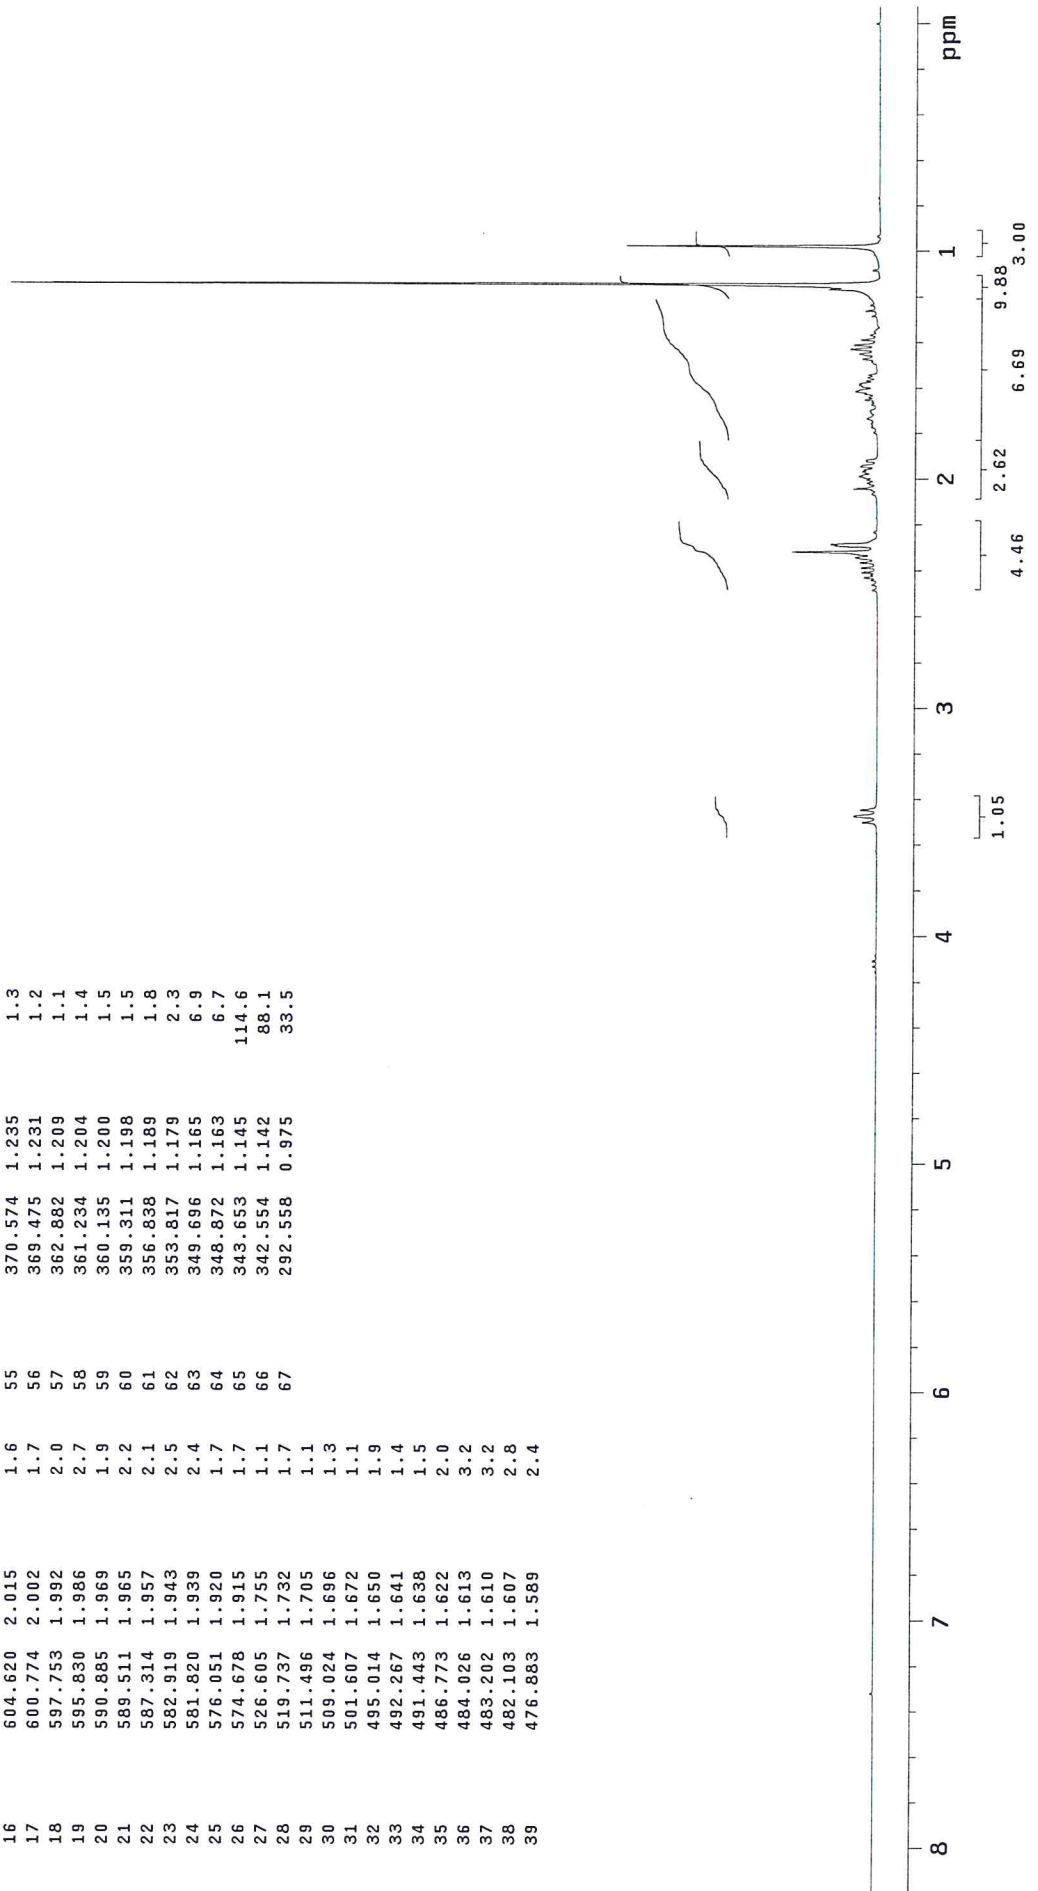

8 7 6 5 4 3 2 1 ppm

| INDEX | FREQUENCY | PPM     | HEIGHT |
|-------|-----------|---------|--------|
| 1     | 15993.810 | 211.987 | 3.1    |
| 2     | 5995.114  | 79.461  | 16.2   |
| 3     | 5858.836  | 77.655  | 3.1    |
| 4     | 5826.771  | 77.230  | 3.2    |
| 5     | 5794.705  | 76.805  | 3.2    |
| 6     | 5475.196  | 72.570  | 8.2    |
| 7     | 3370.328  | 44.671  | 16.8   |
| 8     | 3243.211  | 42.987  | 21.5   |
| 9     | 3176.790  | 42.106  | 6.7    |
| 10    | 2826.360  | 37.462  | 20.0   |
| 11    | 2662.598  | 35.291  | 20.5   |
| 12    | 2404.929  | 31.876  | 18.9   |
| 13    | 2170.164  | 28.764  | 65.1   |
| 14    | 1953.722  | 25.895  | 15.9   |
| 15    | 775.317   | 10.276  | 13.6   |

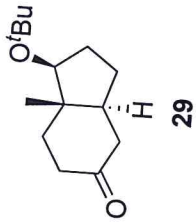

29

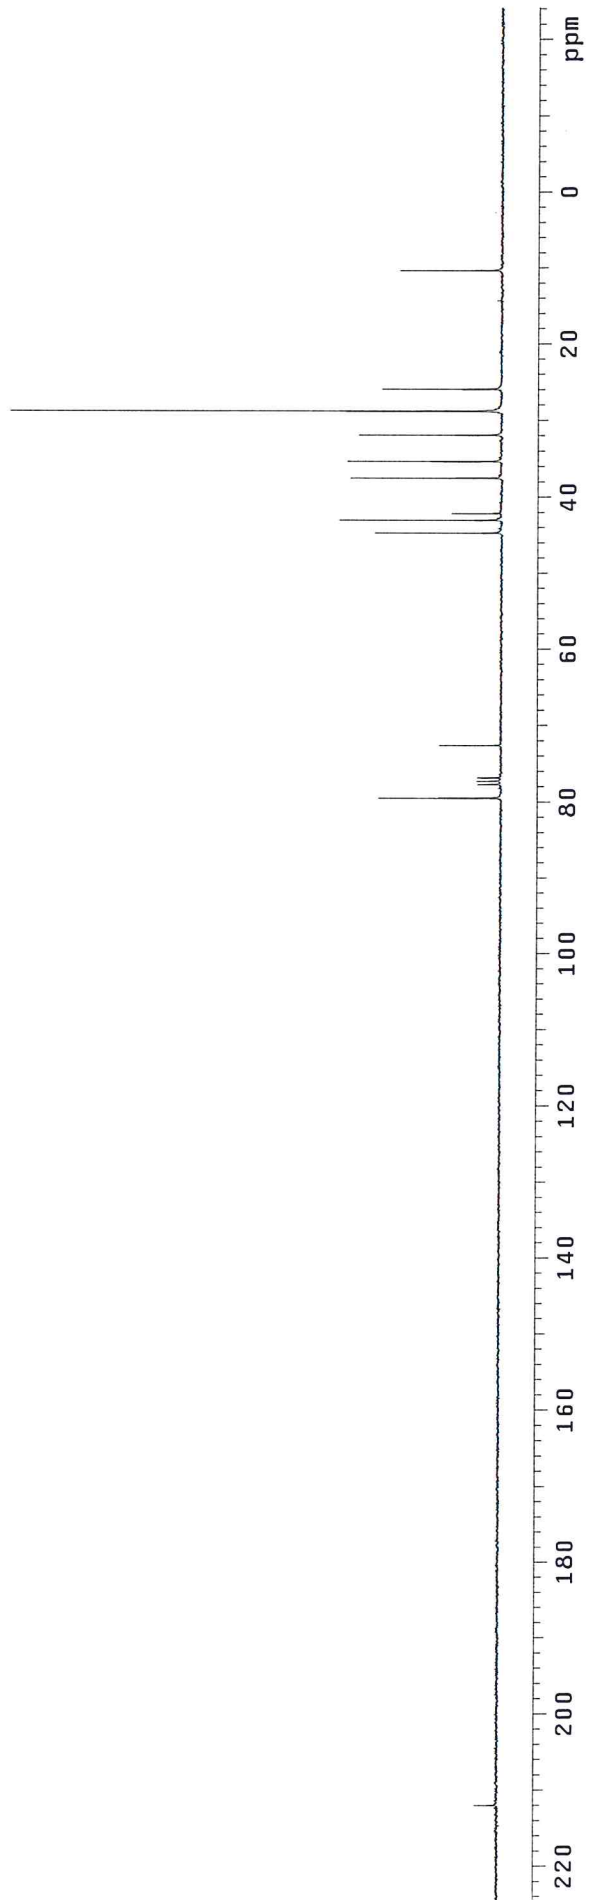

| INDEX | FREQUENCY | PPM    | HEIGHT |
|-------|-----------|--------|--------|
| 1     | 3691.177  | 12.302 | 9.3    |
| 2     | 1126.280  | 3.754  | 42.4   |
| 3     | 651.045   | 2.170  | 5.5    |
| 4     | 350.795   | 1.169  | 111.5  |
| 5     | 216.191   | 0.721  | 25.0   |

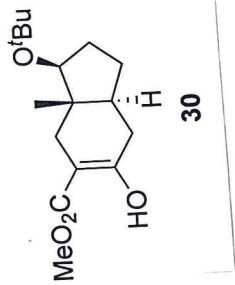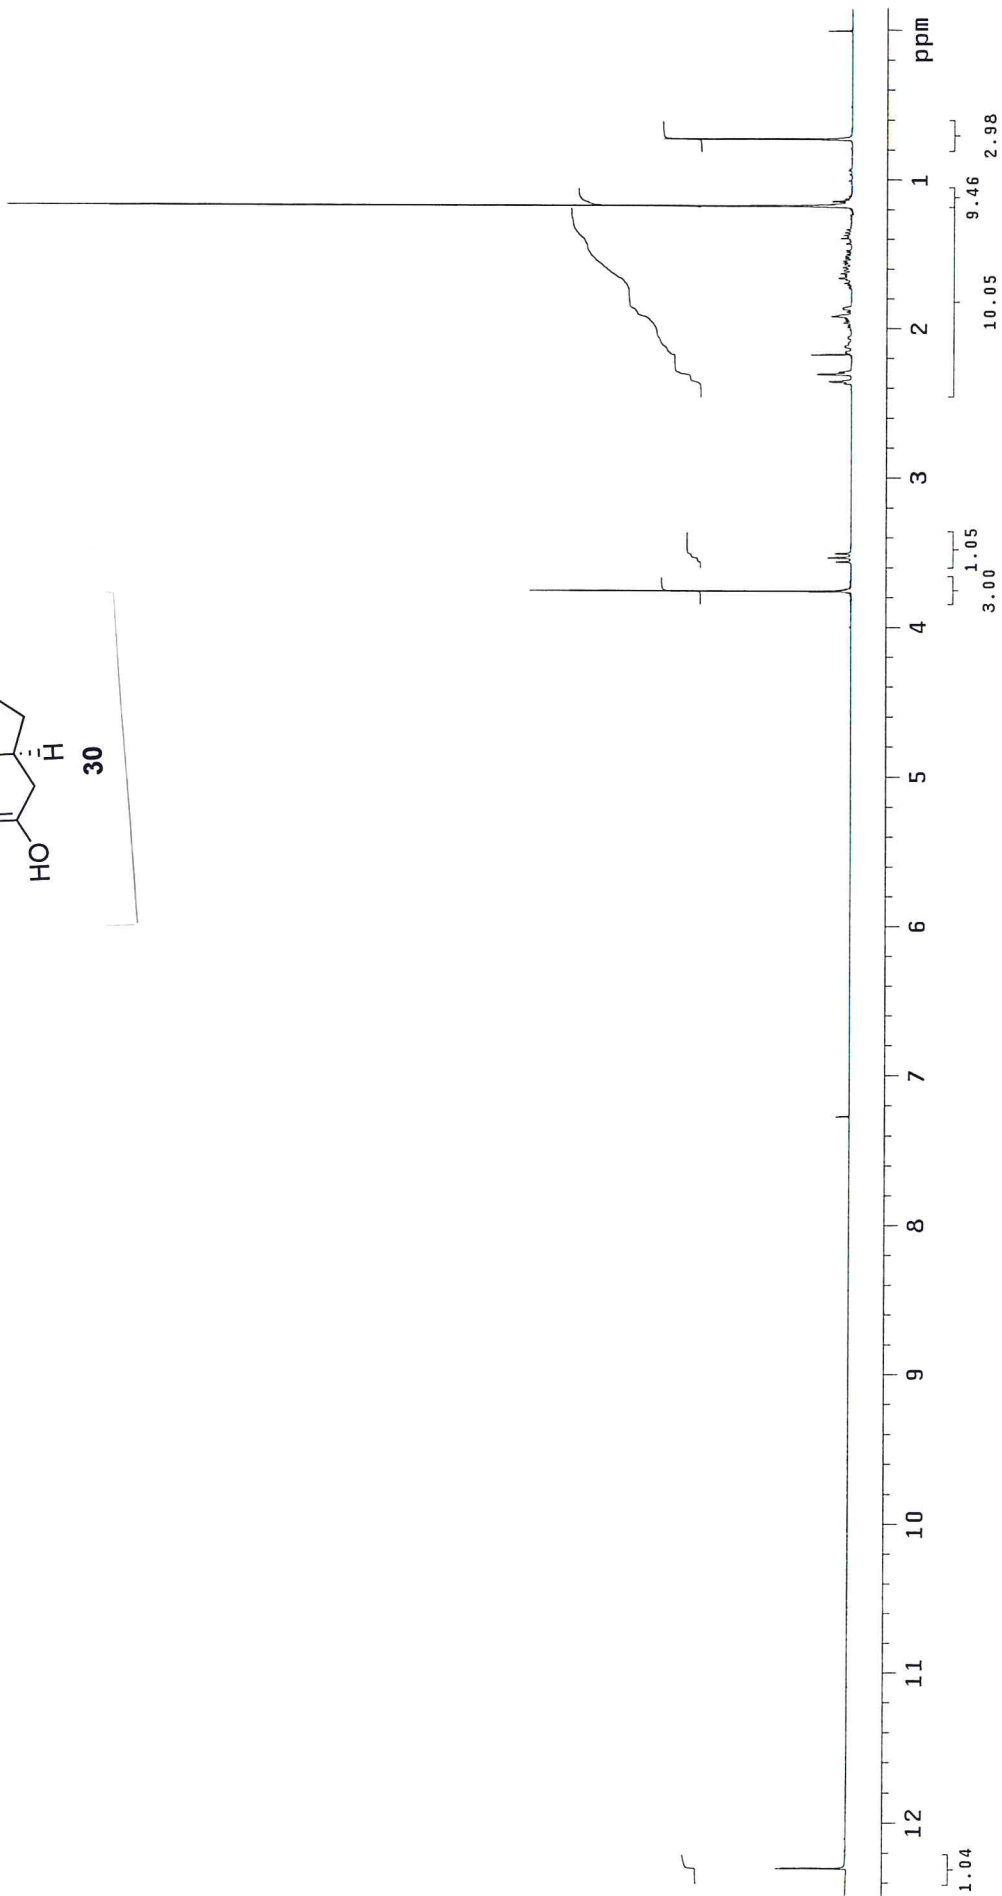



| INDEX | FREQUENCY | PPM     | HEIGHT |
|-------|-----------|---------|--------|
| 1     | 13118.226 | 173.873 | 4.1    |
| 2     | 13007.142 | 172.401 | 10.9   |
| 3     | 7321.250  | 97.038  | 6.9    |
| 4     | 6051.229  | 80.205  | 17.1   |
| 5     | 5857.691  | 77.640  | 17.5   |
| 6     | 5825.625  | 77.215  | 18.4   |
| 7     | 5793.560  | 76.790  | 17.5   |
| 8     | 5476.341  | 72.585  | 10.0   |
| 9     | 3889.101  | 51.547  | 8.7    |
| 10    | 3147.015  | 41.712  | 9.6    |
| 11    | 3017.608  | 39.996  | 16.5   |
| 12    | 2656.871  | 35.215  | 17.4   |
| 13    | 2432.413  | 32.240  | 17.4   |
| 14    | 2385.460  | 31.618  | 18.3   |
| 15    | 2185.051  | 28.961  | 57.8   |
| 16    | 1947.996  | 25.819  | 21.6   |
| 17    | 810.817   | 10.747  | 21.7   |

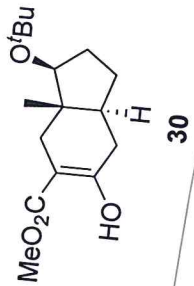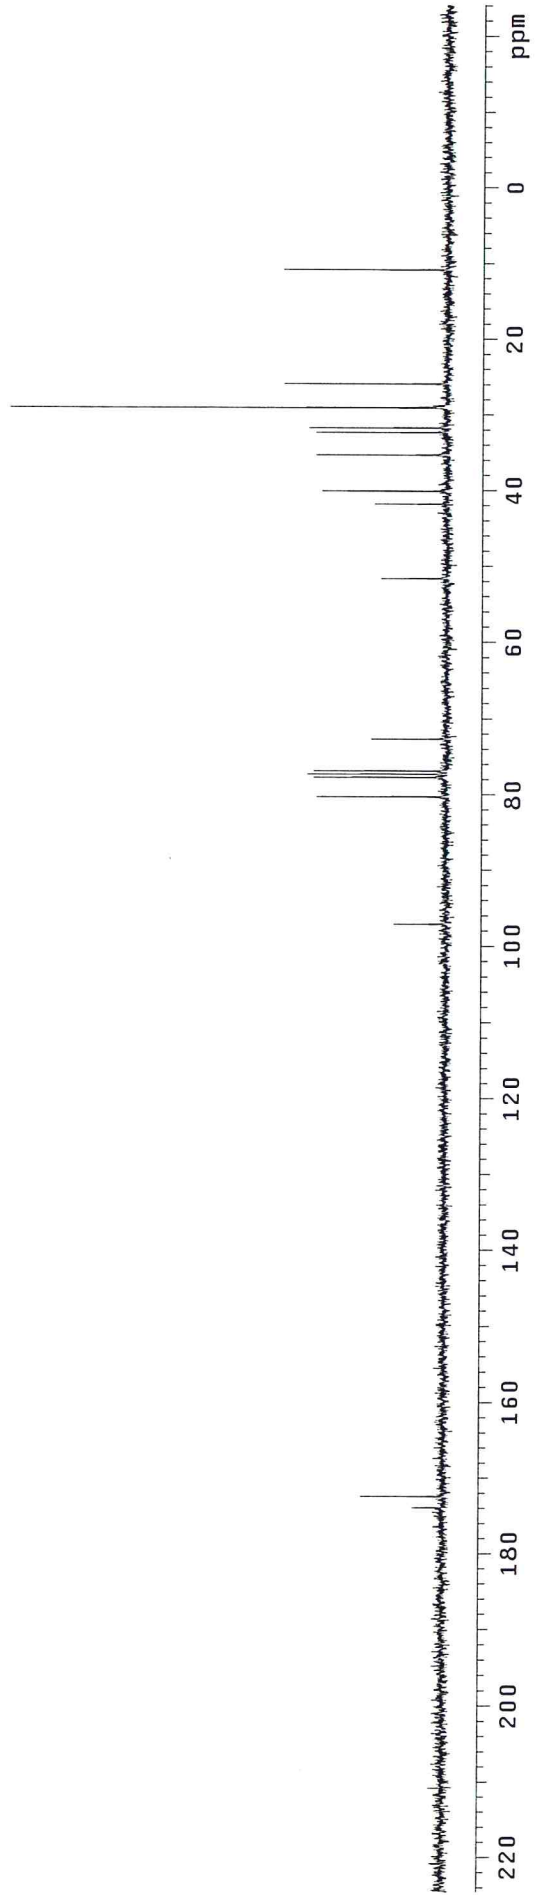

| INDEX | FREQUENCY PPM | HEIGHT | INDEX | FREQUENCY PPM | HEIGHT |
|-------|---------------|--------|-------|---------------|--------|
| 1     | 2180.039      | 7.266  | 40    | 430.459       | 1.435  |
| 2     | 2148.997      | 7.162  | 41    | 423.042       | 1.410  |
| 3     | 2141.855      | 7.138  | 42    | 416.998       | 1.390  |
| 4     | 2141.031      | 7.136  | 43    | 411.230       | 1.371  |
| 5     | 2133.064      | 7.109  | 44    | 344.202       | 1.147  |
| 6     | 2028.128      | 6.759  | 45    | 335.137       | 1.117  |
| 7     | 2022.634      | 6.741  | 46    | 265.363       | 0.884  |
| 8     | 2020.986      | 6.736  | 47    | 245.309       | 0.818  |
| 9     | 2018.239      | 6.726  | 48    | -0.000        | -0.000 |
| 10    | 1142.762      | 3.809  |       |               |        |
| 11    | 1142.213      | 3.807  |       |               |        |
| 12    | 1140.015      | 3.799  |       |               |        |
| 13    | 1128.203      | 3.760  |       |               |        |
| 14    | 1121.061      | 3.736  |       |               |        |
| 15    | 1118.039      | 3.726  |       |               |        |
| 16    | 1116.116      | 3.720  |       |               |        |
| 17    | 1088.646      | 3.628  |       |               |        |
| 18    | 1060.077      | 3.533  |       |               |        |
| 19    | 999.367       | 3.331  |       |               |        |
| 20    | 992.225       | 3.307  |       |               |        |
| 21    | 983.435       | 3.278  |       |               |        |
| 22    | 957.063       | 3.190  |       |               |        |
| 23    | 943.603       | 3.145  |       |               |        |
| 24    | 903.496       | 3.011  |       |               |        |
| 25    | 890.311       | 2.967  |       |               |        |
| 26    | 780.430       | 2.601  |       |               |        |
| 27    | 768.617       | 2.562  |       |               |        |
| 28    | 755.157       | 2.517  |       |               |        |
| 29    | 722.193       | 2.407  |       |               |        |
| 30    | 719.171       | 2.397  |       |               |        |
| 31    | 707.908       | 2.359  |       |               |        |
| 32    | 704.886       | 2.349  |       |               |        |
| 33    | 510.672       | 1.702  |       |               |        |
| 34    | 458.753       | 1.529  |       |               |        |
| 35    | 457.105       | 1.523  |       |               |        |
| 36    | 450.512       | 1.501  |       |               |        |
| 37    | 445.842       | 1.486  |       |               |        |
| 38    | 443.370       | 1.478  |       |               |        |
| 39    | 436.502       | 1.455  |       |               |        |

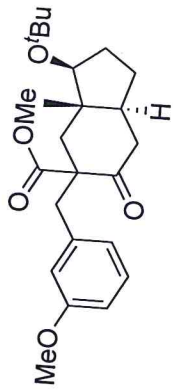

31

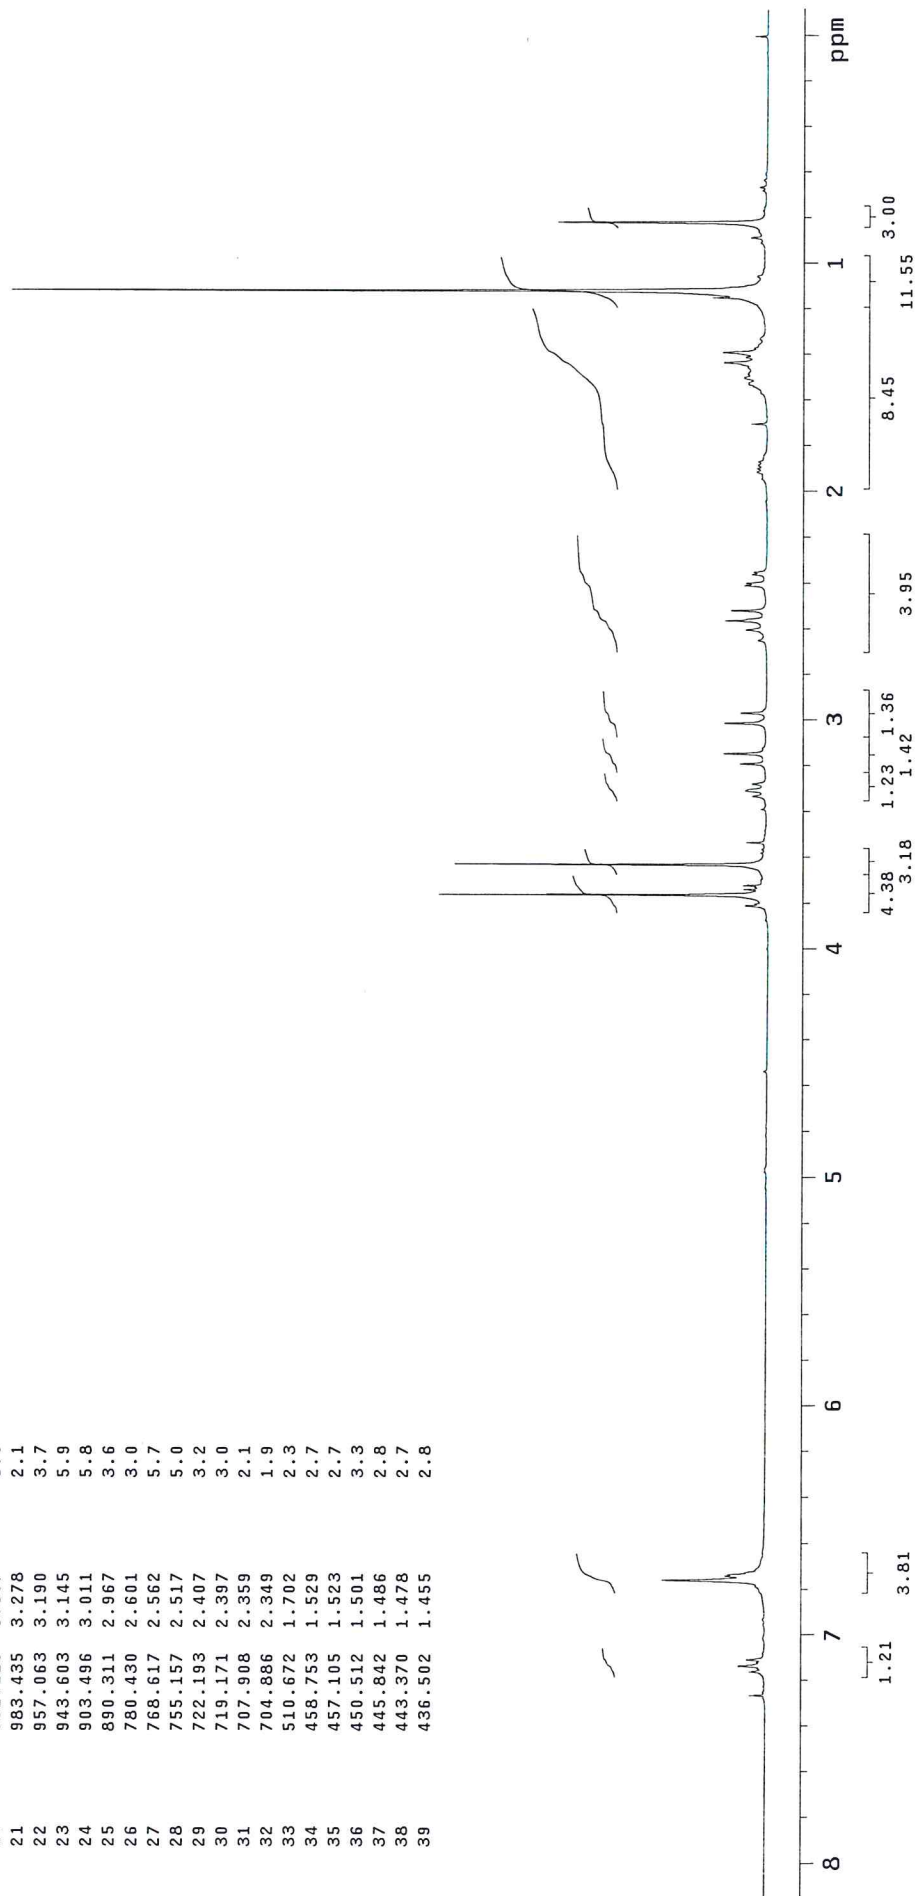

| INDEX | FREQUENCY | PPM     | HEIGHT |
|-------|-----------|---------|--------|
| 1     | 15654.832 | 207.494 | 6.9    |
| 2     | 13114.790 | 173.828 | 7.6    |
| 3     | 12022.274 | 159.347 | 7.8    |
| 4     | 10451.067 | 138.522 | 10.0   |
| 5     | 9721.578  | 128.853 | 18.0   |
| 6     | 9333.357  | 123.707 | 17.0   |
| 7     | 8797.406  | 116.604 | 14.5   |
| 8     | 8504.236  | 112.718 | 18.0   |
| 9     | 6069.552  | 80.448  | 16.0   |
| 10    | 5856.546  | 77.625  | 16.3   |
| 11    | 5824.480  | 77.200  | 16.7   |
| 12    | 5792.415  | 76.775  | 15.8   |
| 13    | 5490.083  | 72.767  | 9.4    |
| 14    | 4480.022  | 59.380  | 12.2   |
| 15    | 4166.238  | 55.221  | 16.2   |
| 16    | 3961.248  | 52.504  | 10.7   |
| 17    | 3440.185  | 45.597  | 16.2   |
| 18    | 3412.700  | 45.233  | 19.8   |
| 19    | 3208.855  | 42.531  | 16.4   |
| 20    | 3205.420  | 42.486  | 20.9   |
| 21    | 3158.467  | 41.863  | 17.1   |
| 22    | 2376.299  | 31.496  | 16.2   |
| 23    | 2167.873  | 28.734  | 58.4   |
| 24    | 1937.689  | 25.683  | 16.7   |
| 25    | 876.094   | 11.612  | 19.7   |

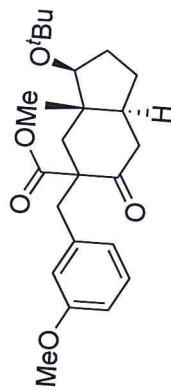

31

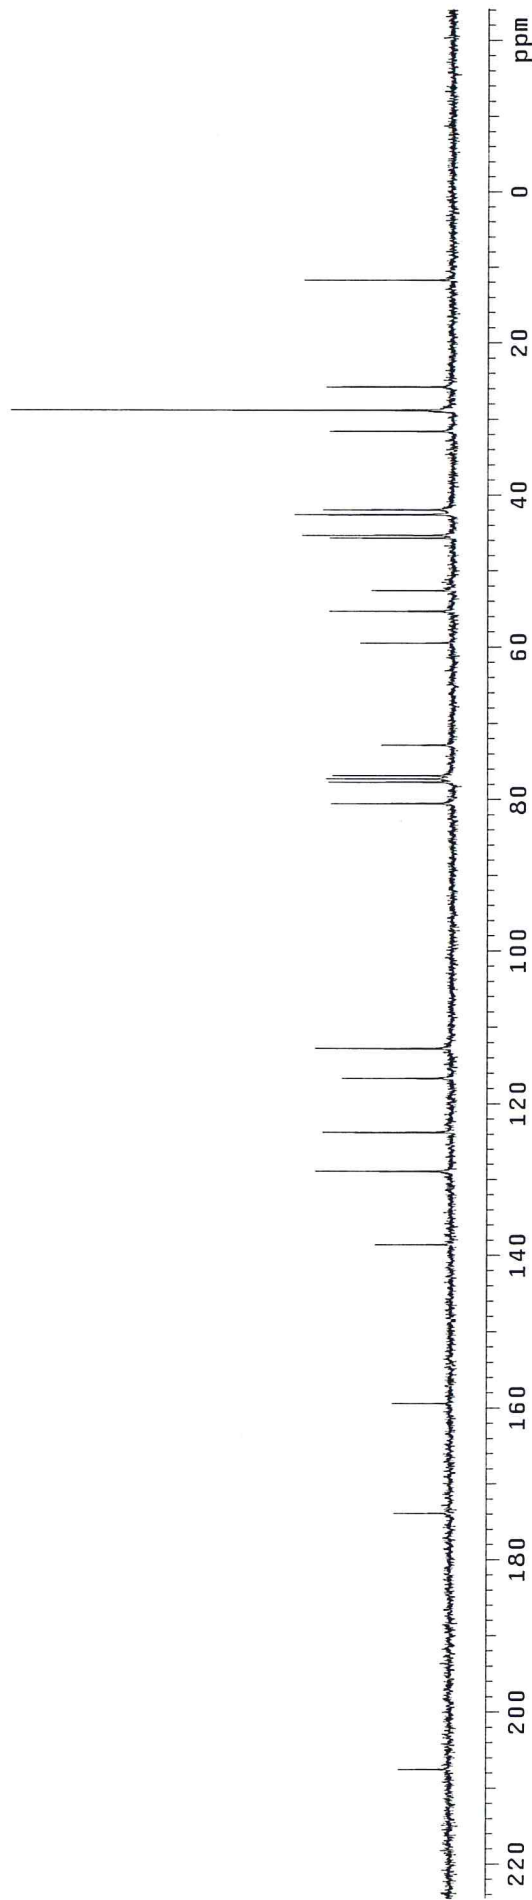

| INDEX | FREQUENCY PPM | HEIGHT | INDEX | FREQUENCY PPM | HEIGHT |
|-------|---------------|--------|-------|---------------|--------|
| 1     | 2177.841      | 7.258  | 40    | 512.045       | 1.707  |
| 2     | 2159.711      | 7.198  | 41    | 506.002       | 1.686  |
| 3     | 2151.744      | 7.171  | 42    | 499.684       | 1.665  |
| 4     | 2144.053      | 7.146  | 43    | 493.640       | 1.645  |
| 5     | 2022.634      | 6.741  | 44    | 487.047       | 1.623  |
| 6     | 2014.668      | 6.714  | 45    | 483.202       | 1.610  |
| 7     | 2011.371      | 6.704  | 46    | 472.213       | 1.574  |
| 8     | 2009.723      | 6.698  | 47    | 466.445       | 1.555  |
| 9     | 1141.663      | 3.805  | 48    | 464.247       | 1.547  |
| 10    | 1138.916      | 3.796  | 49    | 462.324       | 1.541  |
| 11    | 1133.148      | 3.777  | 50    | 459.028       | 1.530  |
| 12    | 1130.675      | 3.768  | 51    | 455.182       | 1.517  |
| 13    | 1125.731      | 3.752  | 52    | 453.534       | 1.512  |
| 14    | 1120.511      | 3.734  | 53    | 451.611       | 1.505  |
| 15    | 1117.490      | 3.724  | 54    | 441.447       | 1.471  |
| 16    | 1030.409      | 3.434  | 55    | 437.601       | 1.458  |
| 17    | 1022.992      | 3.409  | 56    | 431.008       | 1.436  |
| 18    | 1014.201      | 3.380  | 57    | 424.965       | 1.416  |
| 19    | 990.028       | 3.300  | 58    | 419.471       | 1.398  |
| 20    | 985.083       | 3.283  | 59    | 412.878       | 1.376  |
| 21    | 976.292       | 3.254  | 60    | 348.597       | 1.162  |
| 22    | 971.348       | 3.237  | 61    | 342.279       | 1.141  |
| 23    | 791.692       | 2.639  | 62    | 335.412       | 1.118  |
| 24    | 789.770       | 2.632  | 63    | 327.171       | 1.090  |
| 25    | 784.550       | 2.615  | 64    | 322.775       | 1.076  |
| 26    | 778.507       | 2.595  | 65    | 316.183       | 1.054  |
| 27    | 771.639       | 2.572  | 66    | 312.886       | 1.043  |
| 28    | 726.863       | 2.422  | 67    | 307.667       | 1.025  |
| 29    | 720.819       | 2.402  | 68    | 298.602       | 0.995  |
| 30    | 712.853       | 2.376  | 69    | 291.185       | 0.970  |
| 31    | 706.809       | 2.356  | 70    | 282.394       | 0.941  |
| 32    | 700.766       | 2.336  | 71    | 220.586       | 0.735  |
| 33    | 692.800       | 2.309  | 72    | 0.000         | 0.000  |
| 34    | 599.675       | 1.999  |       |               |        |
| 35    | 593.632       | 1.978  |       |               |        |
| 36    | 587.039       | 1.956  |       |               |        |
| 37    | 580.996       | 1.936  |       |               |        |
| 38    | 571.930       | 1.906  |       |               |        |
| 39    | 524.407       | 1.748  |       |               |        |

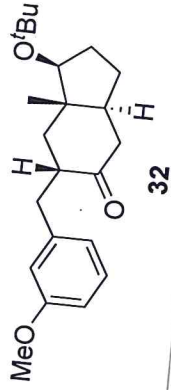

32

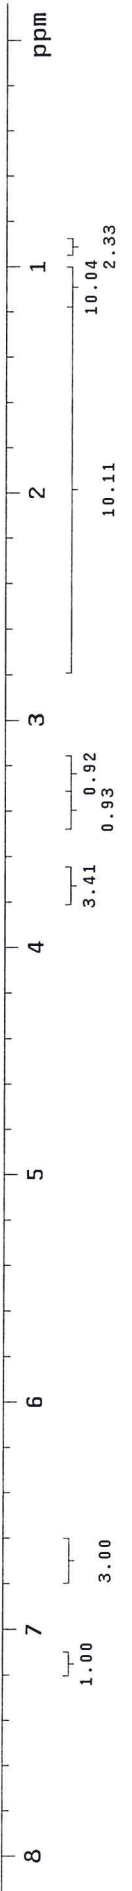

| LINE | FREQUENCY | PPM     | HEIGHT |
|------|-----------|---------|--------|
| 1    | 15985.794 | 211.881 | 4.7    |
| 2    | 15985.794 | 211.881 | 5.6    |
| 3    | 10741.947 | 142.377 | 6.1    |
| 4    | 9754.789  | 129.293 | 12.0   |
| 5    | 9183.337  | 121.719 | 13.8   |
| 6    | 8665.709  | 114.858 | 11.4   |
| 7    | 8418.346  | 111.580 | 13.0   |
| 8    | 5998.550  | 79.507  | 12.5   |
| 9    | 5857.691  | 77.640  | 10.0   |
| 10   | 5825.626  | 77.215  | 10.0   |
| 11   | 5793.560  | 76.790  | 10.4   |
| 12   | 5480.922  | 72.646  | 6.1    |
| 13   | 4167.383  | 55.236  | 10.7   |
| 14   | 3583.334  | 47.495  | 13.0   |
| 15   | 3466.524  | 45.946  | 12.7   |
| 16   | 3250.082  | 43.078  | 14.7   |
| 17   | 3224.888  | 42.744  | 15.4   |
| 18   | 2711.841  | 35.944  | 13.2   |
| 19   | 2408.364  | 31.921  | 12.4   |
| 20   | 2169.019  | 28.749  | 46.2   |
| 21   | 1949.141  | 25.835  | 12.7   |
| 22   | 847.464   | 11.233  | 12.7   |

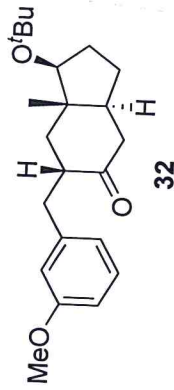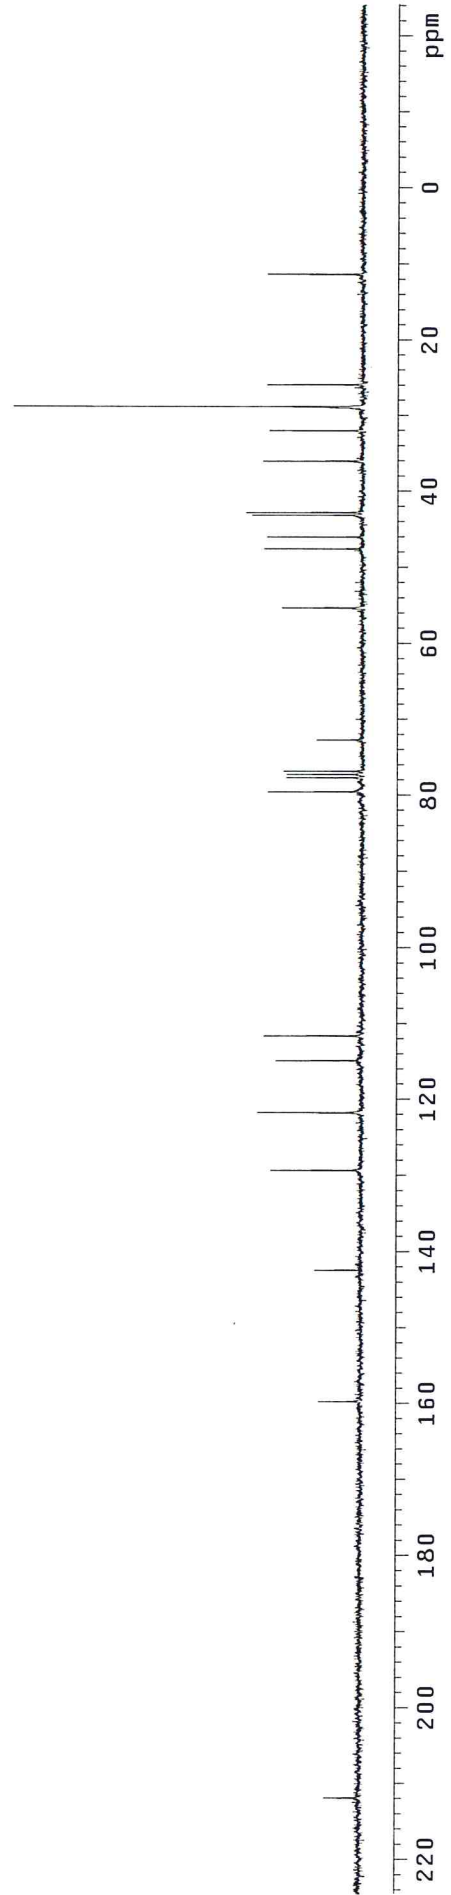

| INDEX | FREQUENCY PPM | HEIGHT | INDEX | FREQUENCY PPM | HEIGHT |
|-------|---------------|--------|-------|---------------|--------|
| 1     | 2199.817      | 7.332  | 40    | 504.079       | 1.680  |
| 2     | 2194.872      | 7.315  | 41    | 473.587       | 1.578  |
| 3     | 2178.116      | 7.259  | 42    | 460.401       | 1.534  |
| 4     | 2176.742      | 7.255  | 43    | 452.160       | 1.507  |
| 5     | 2163.282      | 7.210  | 44    | 444.469       | 1.481  |
| 6     | 2155.590      | 7.184  | 45    | 435.403       | 1.451  |
| 7     | 2147.898      | 7.159  | 46    | 429.085       | 1.430  |
| 8     | 2028.128      | 6.759  | 47    | 421.394       | 1.404  |
| 9     | 2024.008      | 6.746  | 48    | 409.581       | 1.365  |
| 10    | 2020.711      | 6.735  | 49    | 404.637       | 1.349  |
| 11    | 2013.569      | 6.711  | 50    | 399.967       | 1.333  |
| 12    | 1430.101      | 4.766  | 51    | 394.198       | 1.314  |
| 13    | 1407.026      | 4.689  | 52    | 338.708       | 1.129  |
| 14    | 1138.092      | 3.793  | 53    | 337.609       | 1.125  |
| 15    | 1136.719      | 3.788  | 54    | 319.204       | 1.064  |
| 16    | 1009.257      | 3.364  | 55    | 318.105       | 1.060  |
| 17    | 1001.840      | 3.339  | 56    | 226.080       | 0.753  |
| 18    | 993.324       | 3.311  | 57    | 213.444       | 0.711  |
| 19    | 938.933       | 3.129  | 58    | 201.632       | 0.672  |
| 20    | 934.812       | 3.116  | 59    | 1.374         | 0.005  |
| 21    | 926.297       | 3.087  | 60    | -0.000        | -0.000 |
| 22    | 921.901       | 3.073  |       |               |        |
| 23    | 742.246       | 2.474  |       |               |        |
| 24    | 726.313       | 2.421  |       |               |        |
| 25    | 716.973       | 2.390  |       |               |        |
| 26    | 713.402       | 2.378  |       |               |        |
| 27    | 704.612       | 2.348  |       |               |        |
| 28    | 665.055       | 2.216  |       |               |        |
| 29    | 662.308       | 2.207  |       |               |        |
| 30    | 652.144       | 2.173  |       |               |        |
| 31    | 649.397       | 2.164  |       |               |        |
| 32    | 642.529       | 2.141  |       |               |        |
| 33    | 630.717       | 2.102  |       |               |        |
| 34    | 571.930       | 1.906  |       |               |        |
| 35    | 561.217       | 1.870  |       |               |        |
| 36    | 558.470       | 1.861  |       |               |        |
| 37    | 520.012       | 1.733  |       |               |        |
| 38    | 516.441       | 1.721  |       |               |        |
| 39    | 508.474       | 1.695  |       |               |        |

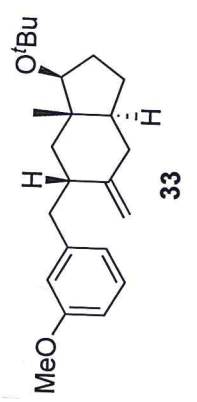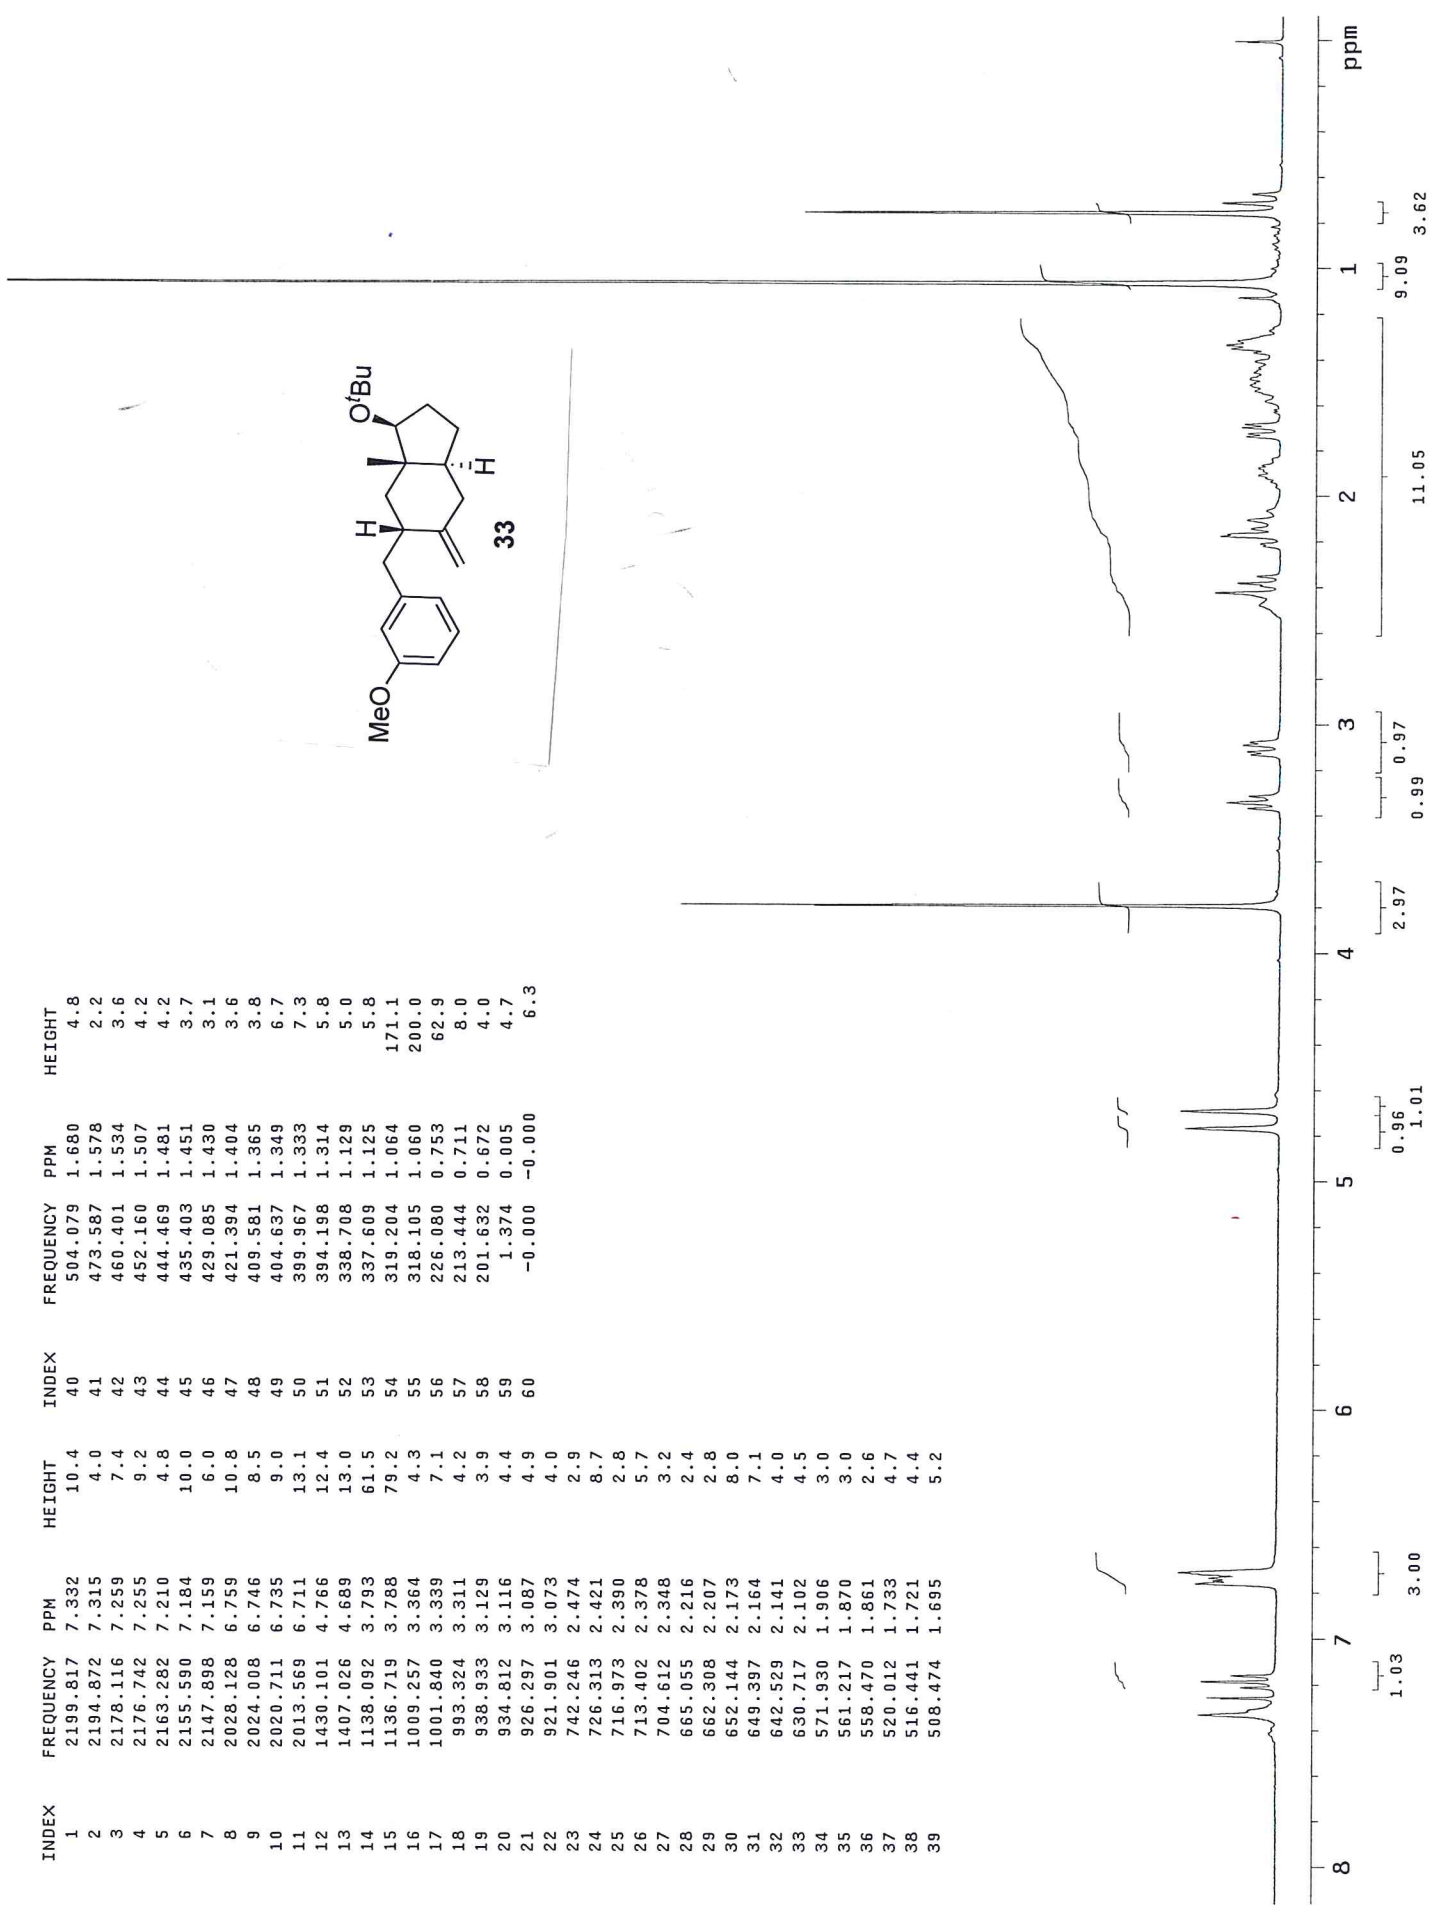

8 7 6 5 4 3 2 1 ppm

1.03 3.00 0.96 1.01 2.97 0.99 0.97 11.05 9.09 3.62

| INDEX | FREQUENCY | PPM     | HEIGHT |
|-------|-----------|---------|--------|
| 1     | 12052.049 | 159.742 | 3.7    |
| 2     | 11567.632 | 153.321 | 4.8    |
| 3     | 10802.642 | 143.182 | 4.0    |
| 4     | 9750.208  | 129.233 | 9.1    |
| 5     | 9179.901  | 121.674 | 10.0   |
| 6     | 8657.692  | 114.752 | 9.2    |
| 7     | 8401.168  | 111.352 | 8.4    |
| 8     | 8023.254  | 106.343 | 7.6    |
| 9     | 6070.697  | 80.463  | 9.0    |
| 10    | 5857.691  | 77.640  | 20.4   |
| 11    | 5825.625  | 77.215  | 21.5   |
| 12    | 5793.560  | 76.790  | 21.8   |
| 13    | 5462.598  | 72.403  | 5.7    |
| 14    | 4171.964  | 55.297  | 5.9    |
| 15    | 3573.027  | 47.358  | 10.1   |
| 16    | 3360.021  | 44.535  | 8.6    |
| 17    | 3256.953  | 43.169  | 6.3    |
| 18    | 2979.816  | 39.495  | 9.1    |
| 19    | 2931.718  | 38.858  | 11.3   |
| 20    | 2804.601  | 37.173  | 10.5   |
| 21    | 2395.767  | 31.754  | 9.7    |
| 22    | 2175.889  | 28.840  | 31.5   |
| 23    | 1945.705  | 25.789  | 8.2    |
| 24    | 870.367   | 11.536  | 9.7    |

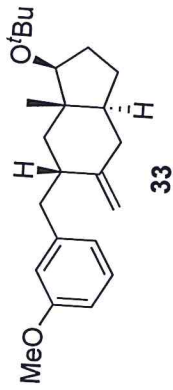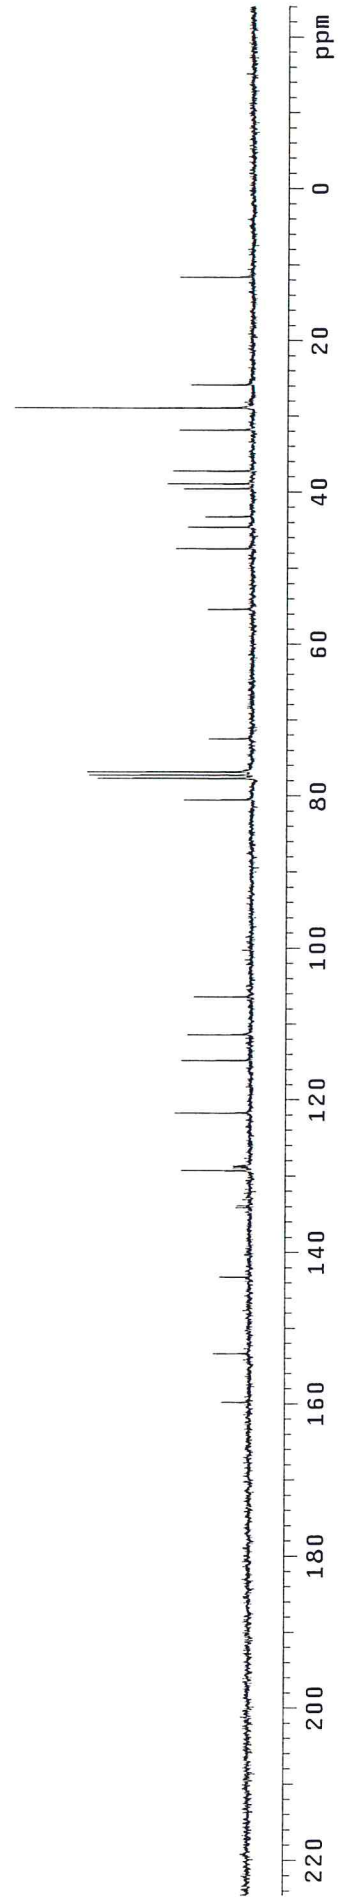

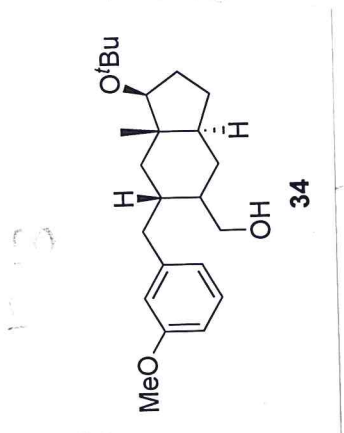

| INDEX | FREQUENCY PPM | HEIGHT | INDEX | FREQUENCY PPM | HEIGHT |
|-------|---------------|--------|-------|---------------|--------|
| 1     | 2176.742      | 7.255  | 40    | 551.328       | 1.837  |
| 2     | 2164.106      | 7.213  | 41    | 546.933       | 1.823  |
| 3     | 2156.689      | 7.188  | 42    | 528.253       | 1.761  |
| 4     | 2147.898      | 7.159  | 43    | 519.462       | 1.731  |
| 5     | 2032.249      | 6.773  | 44    | 510.122       | 1.700  |
| 6     | 2024.008      | 6.746  | 45    | 498.310       | 1.661  |
| 7     | 2021.810      | 6.738  | 46    | 493.640       | 1.645  |
| 8     | 2015.492      | 6.717  | 47    | 471.115       | 1.570  |
| 9     | 2002.031      | 6.672  | 48    | 467.818       | 1.559  |
| 10    | 1149.355      | 3.831  | 49    | 458.478       | 1.528  |
| 11    | 1144.410      | 3.814  | 50    | 455.182       | 1.517  |
| 12    | 1134.796      | 3.782  | 51    | 441.722       | 1.472  |
| 13    | 1132.049      | 3.773  | 52    | 435.403       | 1.451  |
| 14    | 1126.280      | 3.754  | 53    | 430.459       | 1.435  |
| 15    | 1099.909      | 3.666  | 54    | 425.789       | 1.419  |
| 16    | 1090.019      | 3.633  | 55    | 423.042       | 1.410  |
| 17    | 1086.448      | 3.621  | 56    | 414.251       | 1.381  |
| 18    | 1079.581      | 3.598  | 57    | 396.670       | 1.322  |
| 19    | 1026.014      | 3.420  | 58    | 387.330       | 1.291  |
| 20    | 1018.597      | 3.395  | 59    | 382.111       | 1.274  |
| 21    | 1010.081      | 3.366  | 60    | 376.892       | 1.256  |
| 22    | 793.341       | 2.644  | 61    | 370.574       | 1.235  |
| 23    | 785.374       | 2.617  | 62    | 360.684       | 1.202  |
| 24    | 779.606       | 2.598  | 63    | 346.125       | 1.154  |
| 25    | 771.914       | 2.573  | 64    | 320.852       | 1.105  |
| 26    | 743.894       | 2.479  | 65    | 320.852       | 1.069  |
| 27    | 736.477       | 2.455  | 66    | 289.536       | 0.965  |
| 28    | 730.434       | 2.434  | 67    | 276.900       | 0.923  |
| 29    | 722.742       | 2.409  | 68    | 264.264       | 0.881  |
| 30    | 661.209       | 2.204  | 69    | 244.485       | 0.815  |
| 31    | 657.638       | 2.192  | 70    | 217.015       | 0.723  |
| 32    | 653.517       | 2.178  | 71    | 210.422       | 0.701  |
| 33    | 649.397       | 2.164  | 72    | 186.798       | 0.623  |
| 34    | 645.276       | 2.151  |       |               |        |
| 35    | 610.389       | 2.034  |       |               |        |
| 36    | 568.909       | 1.896  |       |               |        |
| 37    | 564.514       | 1.881  |       |               |        |
| 38    | 560.118       | 1.867  |       |               |        |
| 39    | 555.723       | 1.852  |       |               |        |

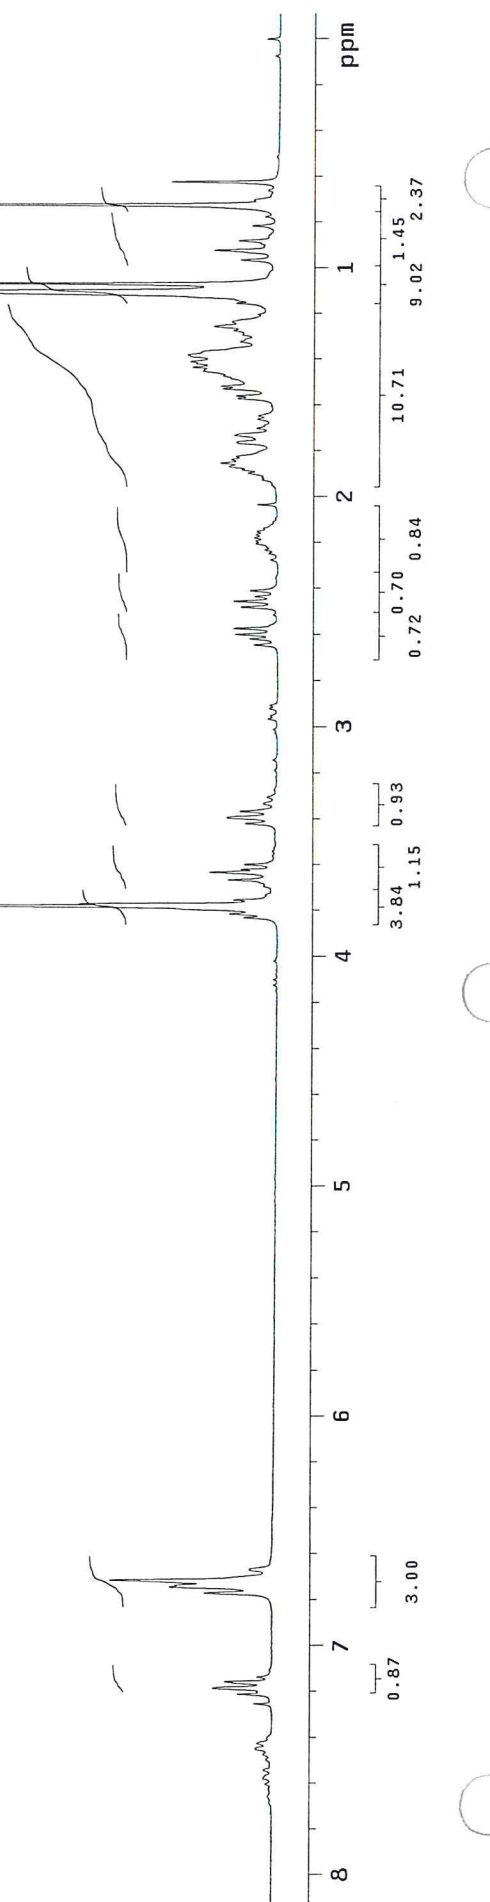

8 7 6 5 4 3 2 1 ppm



| INDEX | FREQUENCY | PPM     | HEIGHT |
|-------|-----------|---------|--------|
| 1     | 12053.195 | 159.757 | 3.7    |
| 2     | 10788.900 | 143.000 | 5.3    |
| 3     | 9757.079  | 129.324 | 7.6    |
| 4     | 9162.723  | 121.446 | 8.4    |
| 5     | 8661.128  | 114.798 | 7.8    |
| 6     | 8389.717  | 111.200 | 6.9    |
| 7     | 6107.343  | 80.949  | 8.9    |
| 8     | 5857.691  | 77.640  | 6.8    |
| 9     | 5825.626  | 77.215  | 7.0    |
| 10    | 5793.560  | 76.790  | 7.2    |
| 11    | 5454.582  | 72.297  | 5.9    |
| 12    | 4554.459  | 60.366  | 5.9    |
| 13    | 4169.674  | 55.266  | 6.8    |
| 14    | 3264.970  | 43.275  | 5.8    |
| 15    | 3049.673  | 40.421  | 8.7    |
| 16    | 3047.383  | 40.391  | 10.4   |
| 17    | 3000.430  | 39.769  | 7.7    |
| 18    | 2943.170  | 39.010  | 9.0    |
| 19    | 2773.681  | 36.763  | 9.4    |
| 20    | 2369.428  | 31.405  | 8.7    |
| 21    | 2179.325  | 28.896  | 26.4   |
| 22    | 2173.599  | 28.810  | 8.3    |
| 23    | 2009.837  | 26.639  | 7.7    |
| 24    | 1957.158  | 25.941  | 9.0    |
| 25    | 858.916   | 11.384  | 9.3    |

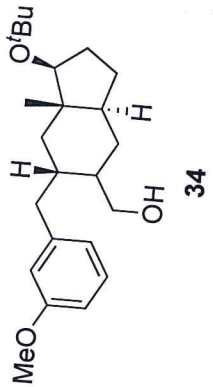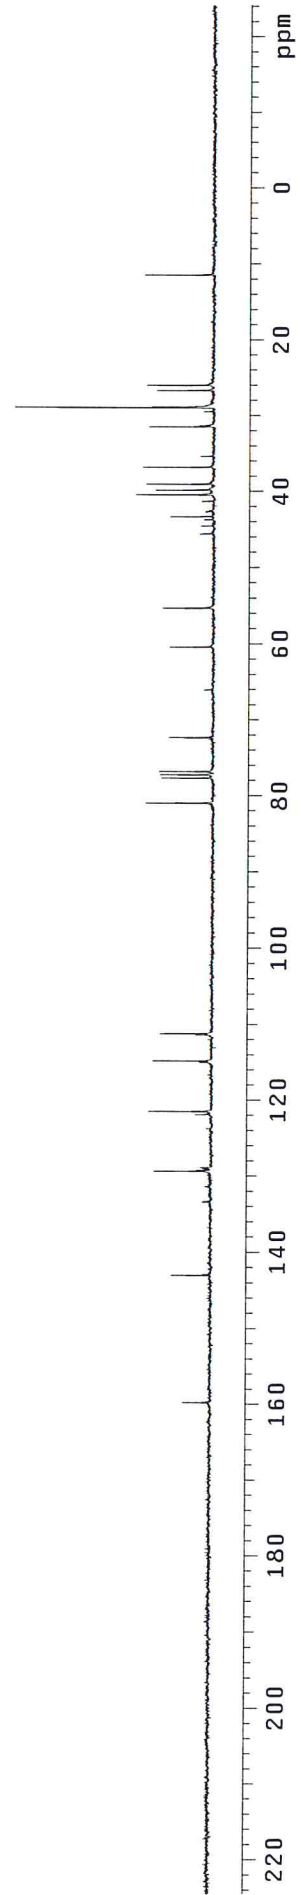

| INDEX | FREQUENCY PPM | HEIGHT |
|-------|---------------|--------|-------|---------------|--------|-------|---------------|--------|-------|---------------|--------|
| 1     | 2906.901      | 9.688  | 8.7   | 586.215       | 1.954  | 79    | 293.932       | 0.980  | 2.1   |               |        |
| 2     | 2905.802      | 9.684  | 11.8  | 549.130       | 1.830  | 80    | 292.558       | 0.975  | 2.0   |               |        |
| 3     | 2904.429      | 9.680  | 6.4   | 543.911       | 1.813  | 81    | 202.456       | 0.675  | 50.2  |               |        |
| 4     | 2155.865      | 7.185  | 1.8   | 541.713       | 1.805  | 82    | 197.236       | 0.657  | 2.3   |               |        |
| 5     | 2138.833      | 7.128  | 4.8   | 539.790       | 1.799  | 83    | 190.643       | 0.635  | 2.6   |               |        |
| 6     | 2131.142      | 7.103  | 7.6   | 535.120       | 1.783  | 84    | 180.480       | 0.602  | 2.5   |               |        |
| 7     | 2123.175      | 7.076  | 5.6   | 530.450       | 1.768  | 85    | 0.000         | 0.000  | 3.9   |               |        |
| 8     | 2001.207      | 6.670  | 6.2   | 528.527       | 1.761  |       |               |        |       |               |        |
| 9     | 1998.460      | 6.660  | 9.5   | 498.310       | 1.661  | 3.0   |               |        |       |               |        |
| 10    | 1996.812      | 6.655  | 7.3   | 494.739       | 1.649  | 2.9   |               |        |       |               |        |
| 11    | 1992.966      | 6.642  | 5.8   | 485.674       | 1.619  | 3.6   |               |        |       |               |        |
| 12    | 1990.494      | 6.634  | 9.5   | 482.103       | 1.607  | 3.2   |               |        |       |               |        |
| 13    | 1983.901      | 6.612  | 7.9   | 439.249       | 1.464  | 1.9   |               |        |       |               |        |
| 14    | 1982.253      | 6.606  | 7.4   | 433.480       | 1.445  | 2.7   |               |        |       |               |        |
| 15    | 1213.635      | 4.045  | 2.8   | 426.063       | 1.420  | 4.3   |               |        |       |               |        |
| 16    | 1206.493      | 4.021  | 2.8   | 420.569       | 1.402  | 6.0   |               |        |       |               |        |
| 17    | 1111.721      | 3.705  | 9.3   | 415.625       | 1.385  | 5.3   |               |        |       |               |        |
| 18    | 1108.974      | 3.696  | 84.7  | 412.603       | 1.375  | 5.6   |               |        |       |               |        |
| 19    | 1009.257      | 3.364  | 3.5   | 407.384       | 1.358  | 4.2   |               |        |       |               |        |
| 20    | 1001.840      | 3.339  | 4.9   | 405.186       | 1.350  | 3.1   |               |        |       |               |        |
| 21    | 1000.466      | 3.334  | 4.1   | 402.988       | 1.343  | 2.7   |               |        |       |               |        |
| 22    | 993.049       | 3.310  | 3.4   | 399.417       | 1.331  | 2.4   |               |        |       |               |        |
| 23    | 863.115       | 2.877  | 2.7   | 396.670       | 1.322  | 2.2   |               |        |       |               |        |
| 24    | 853.775       | 2.845  | 3.3   | 392.000       | 1.306  | 1.8   |               |        |       |               |        |
| 25    | 849.655       | 2.832  | 4.2   | 389.803       | 1.299  | 1.9   |               |        |       |               |        |
| 26    | 840.315       | 2.801  | 4.3   | 384.309       | 1.281  | 3.9   |               |        |       |               |        |
| 27    | 803.779       | 2.679  | 3.7   | 377.991       | 1.260  | 2.2   |               |        |       |               |        |
| 28    | 797.186       | 2.657  | 4.1   | 371.672       | 1.239  | 6.8   |               |        |       |               |        |
| 29    | 790.044       | 2.633  | 2.5   | 366.178       | 1.220  | 3.1   |               |        |       |               |        |
| 30    | 783.726       | 2.612  | 2.6   | 358.487       | 1.195  | 9.4   |               |        |       |               |        |
| 31    | 766.695       | 2.555  | 6.5   | 354.916       | 1.183  | 6.5   |               |        |       |               |        |
| 32    | 711.754       | 2.372  | 1.8   | 353.542       | 1.178  | 6.5   |               |        |       |               |        |
| 33    | 703.513       | 2.345  | 6.2   | 351.344       | 1.171  | 12.4  |               |        |       |               |        |
| 34    | 699.392       | 2.331  | 2.5   | 344.202       | 1.147  | 6.3   |               |        |       |               |        |
| 35    | 652.144       | 2.173  | 3.0   | 342.005       | 1.140  | 2.8   |               |        |       |               |        |
| 36    | 630.167       | 2.100  | 1.9   | 312.062       | 1.040  | 200.0 |               |        |       |               |        |
| 37    | 627.695       | 2.092  | 1.9   | 307.392       | 1.024  | 12.4  |               |        |       |               |        |
| 38    | 626.047       | 2.086  | 1.9   | 306.293       | 1.021  | 10.6  |               |        |       |               |        |
| 39    | 618.905       | 2.063  | 1.8   | 303.821       | 1.013  | 11.6  |               |        |       |               |        |

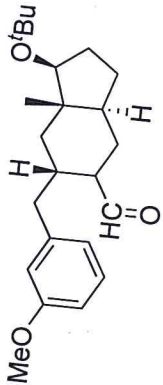

35

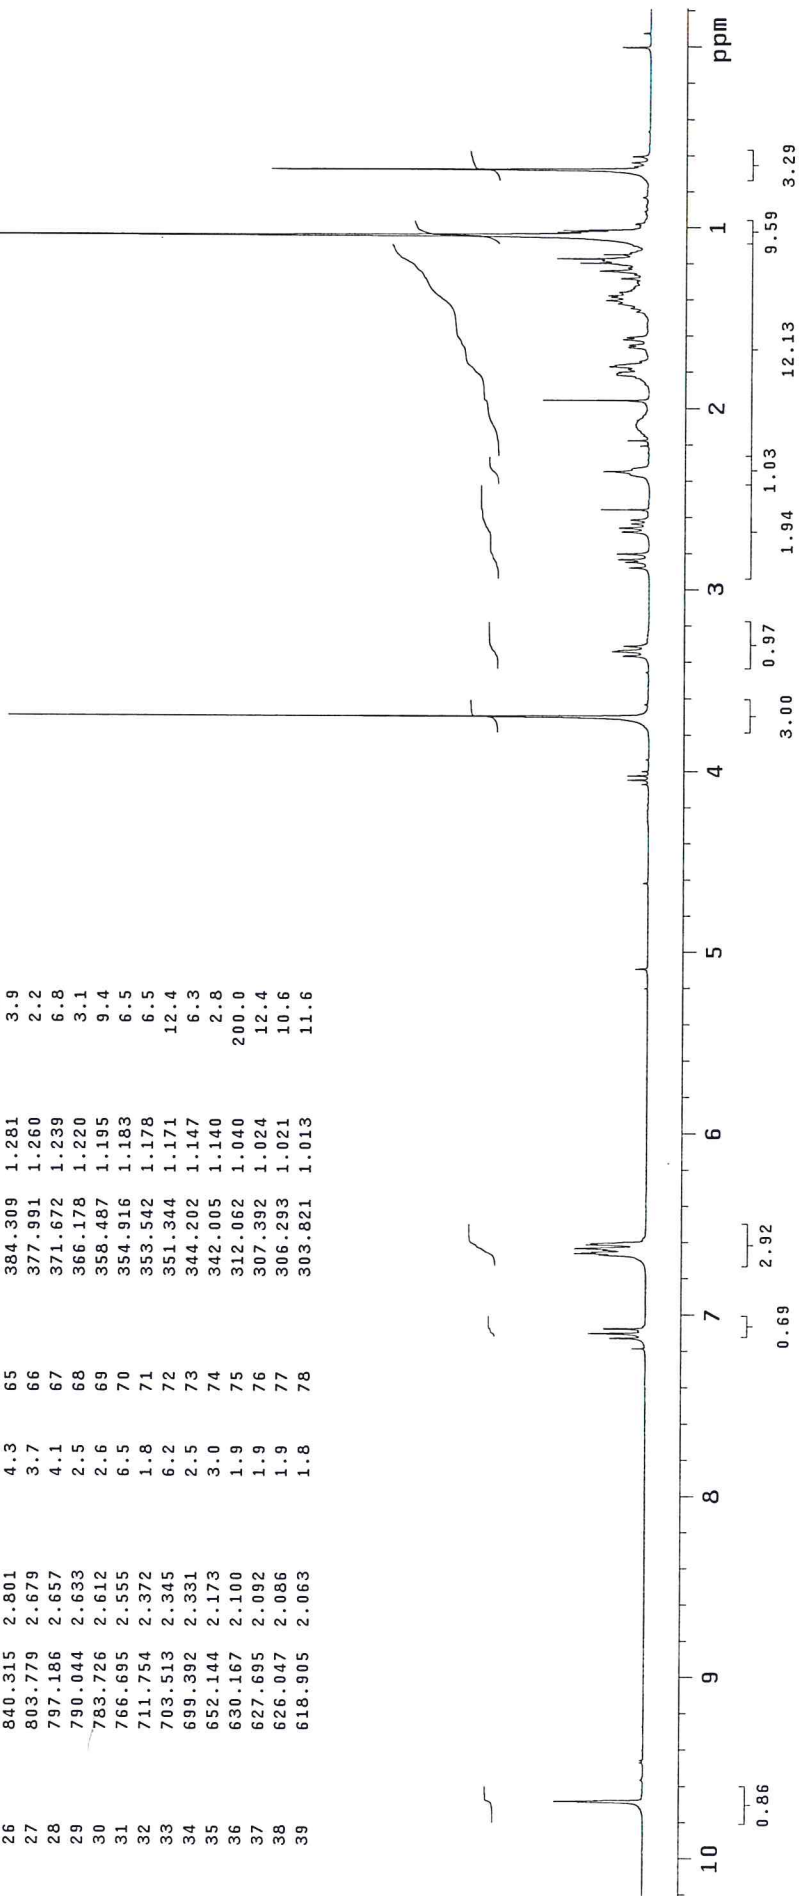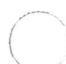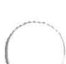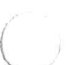

| INDEX | FREQUENCY | PPM     | HEIGHT |
|-------|-----------|---------|--------|
| 1     | 15470.456 | 205.051 | 8.6    |
| 2     | 12057.776 | 159.818 | 5.6    |
| 3     | 10762.560 | 142.651 | 7.8    |
| 4     | 9767.386  | 129.460 | 13.8   |
| 5     | 9158.142  | 121.385 | 15.3   |
| 6     | 8654.257  | 114.706 | 14.1   |
| 7     | 8404.604  | 111.397 | 12.1   |
| 8     | 6076.423  | 80.539  | 14.6   |
| 9     | 5857.691  | 77.640  | 5.2    |
| 10    | 5825.626  | 77.215  | 5.0    |
| 11    | 5794.705  | 76.805  | 4.8    |
| 12    | 5460.309  | 72.373  | 7.0    |
| 13    | 4165.093  | 55.206  | 14.8   |
| 14    | 3727.629  | 49.407  | 14.0   |
| 15    | 3258.099  | 43.184  | 11.0   |
| 16    | 3126.402  | 41.438  | 12.1   |
| 17    | 3094.336  | 41.013  | 16.5   |
| 18    | 2998.140  | 39.738  | 12.6   |
| 19    | 2779.408  | 36.839  | 14.2   |
| 20    | 2357.976  | 31.253  | 14.5   |
| 21    | 2178.180  | 28.870  | 44.9   |
| 22    | 1947.996  | 25.819  | 13.6   |
| 23    | 1918.221  | 25.425  | 12.2   |
| 24    | 852.045   | 11.293  | 12.7   |

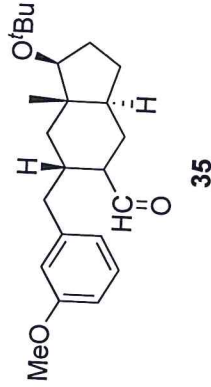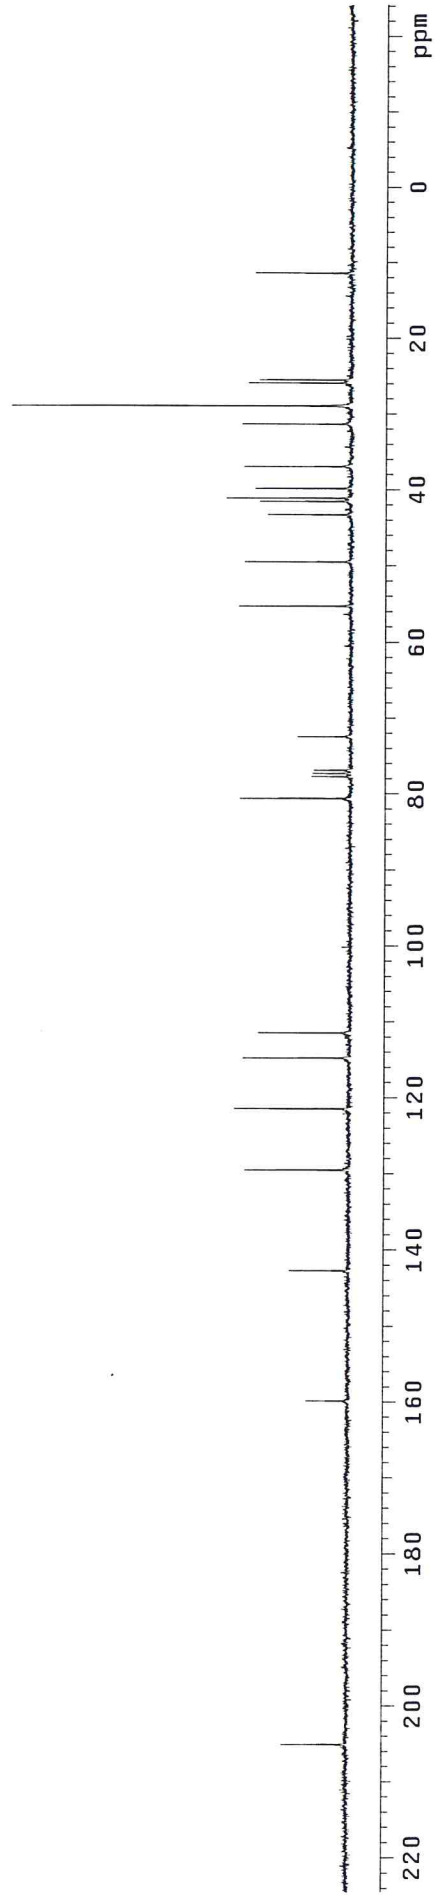

P

| INDEX | FREQUENCY PPM | HEIGHT | INDEX | FREQUENCY PPM | HEIGHT |
|-------|---------------|--------|-------|---------------|--------|
| 1     | 2170.149      | 1.1    | 40    | 484.300       | 1.3    |
| 2     | 2067.411      | 4.0    | 41    | 480.729       | 2.0    |
| 3     | 2061.917      | 1.7    | 42    | 477.708       | 2.0    |
| 4     | 2058.620      | 5.0    | 43    | 471.389       | 2.2    |
| 5     | 1999.559      | 2.5    | 44    | 466.719       | 1.9    |
| 6     | 1997.087      | 5.2    | 45    | 460.951       | 2.1    |
| 7     | 1991.043      | 8.4    | 46    | 457.105       | 2.1    |
| 8     | 1839.682      | 5.2    | 47    | 455.182       | 1.9    |
| 9     | 1141.389      | 2.9    | 48    | 449.413       | 2.2    |
| 10    | 1134.796      | 2.3    | 49    | 446.391       | 2.3    |
| 11    | 1129.576      | 41.0   | 50    | 444.194       | 2.1    |
| 12    | 1032.881      | 2.5    | 51    | 441.722       | 1.9    |
| 13    | 1025.189      | 3.9    | 52    | 434.579       | 2.6    |
| 14    | 1016.948      | 2.2    | 53    | 430.184       | 2.3    |
| 15    | 826.854       | 1.7    | 54    | 421.943       | 2.3    |
| 16    | 822.459       | 2.4    | 55    | 417.548       | 3.2    |
| 17    | 814.218       | 2.6    | 56    | 409.032       | 2.5    |
| 18    | 809.548       | 2.6    | 57    | 403.538       | 2.3    |
| 19    | 778.781       | 1.6    | 58    | 397.769       | 1.9    |
| 20    | 762.849       | 4.0    | 59    | 392.275       | 1.7    |
| 21    | 749.938       | 2.7    | 60    | 386.506       | 1.4    |
| 22    | 735.653       | 1.1    | 61    | 376.342       | 1.8    |
| 23    | 708.732       | 1.5    | 62    | 368.101       | 1.7    |
| 24    | 704.886       | 1.6    | 63    | 345.026       | 109.7  |
| 25    | 693.624       | 3.0    | 64    | 331.291       | 2.0    |
| 26    | 689.503       | 2.9    | 65    | 325.522       | 1.1    |
| 27    | 668.900       | 1.9    | 66    | 283.218       | 2.7    |
| 28    | 656.264       | 2.2    | 67    | 271.681       | 3.6    |
| 29    | 641.430       | 1.2    | 68    | 264.538       | 1.4    |
| 30    | 626.322       | 2.4    | 69    | 260.418       | 2.4    |
| 31    | 621.377       | 2.2    | 70    | 231.299       | 31.8   |
| 32    | 614.235       | 2.8    |       |               |        |
| 33    | 608.741       | 2.4    |       |               |        |
| 34    | 587.039       | 1.4    |       |               |        |
| 35    | 581.820       | 1.7    |       |               |        |
| 36    | 577.699       | 1.8    |       |               |        |
| 37    | 572.755       | 1.4    |       |               |        |
| 38    | 568.909       | 1.6    |       |               |        |
| 39    | 487.322       | 1.2    |       |               |        |

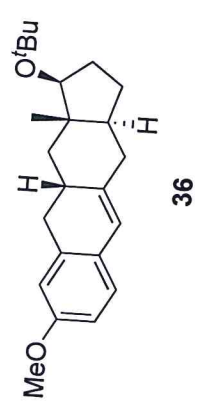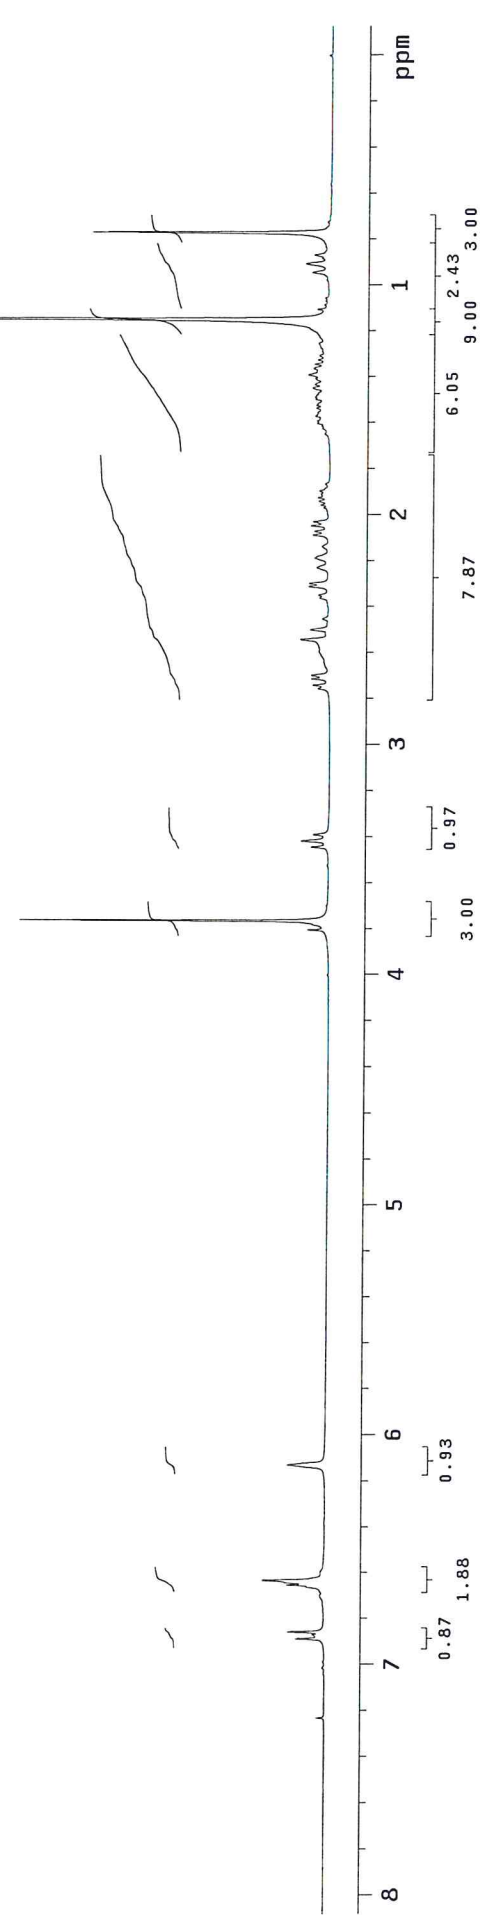

| INDEX | FREQUENCY | PPM     | HEIGHT |
|-------|-----------|---------|--------|
| 1     | 11935.240 | 158.194 | 4.9    |
| 2     | 10598.797 | 140.480 | 7.2    |
| 3     | 10309.063 | 136.640 | 6.1    |
| 4     | 9672.335  | 128.200 | 5.8    |
| 5     | 9509.717  | 126.045 | 12.9   |
| 6     | 9224.564  | 122.266 | 13.5   |
| 7     | 8559.205  | 113.447 | 13.2   |
| 8     | 8383.991  | 111.124 | 11.0   |
| 9     | 6076.423  | 80.539  | 11.6   |
| 10    | 5857.691  | 77.640  | 6.0    |
| 11    | 5825.625  | 77.215  | 6.6    |
| 12    | 5793.560  | 76.790  | 6.3    |
| 13    | 5463.744  | 72.418  | 7.6    |
| 14    | 4179.981  | 55.403  | 11.2   |
| 15    | 3437.894  | 45.567  | 10.6   |
| 16    | 3350.860  | 44.413  | 13.0   |
| 17    | 3261.534  | 43.229  | 7.1    |
| 18    | 2837.812  | 37.613  | 13.2   |
| 19    | 2592.741  | 34.365  | 12.6   |
| 20    | 2475.931  | 32.817  | 14.4   |
| 21    | 2379.734  | 31.542  | 12.0   |
| 22    | 2186.196  | 28.977  | 40.0   |
| 23    | 1958.303  | 25.956  | 14.1   |
| 24    | 823.415   | 10.914  | 12.7   |

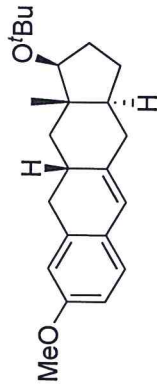

36

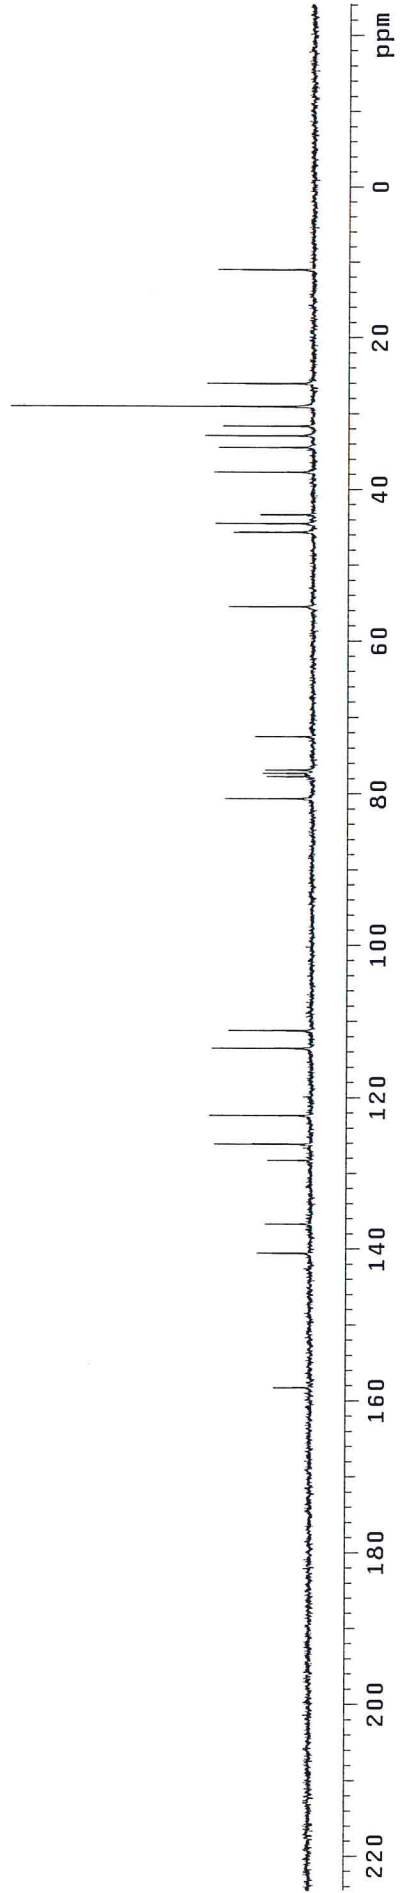

| INDEX | FREQUENCY PPM | HEIGHT | INDEX | FREQUENCY PPM | HEIGHT |
|-------|---------------|--------|-------|---------------|--------|
| 1     | 2155.954      | 7.185  | 40    | 470.929       | 1.570  |
| 2     | 2154.855      | 7.182  | 41    | 465.160       | 1.550  |
| 3     | 2076.290      | 6.920  | 42    | 459.666       | 1.532  |
| 4     | 2068.049      | 6.892  | 43    | 456.095       | 1.520  |
| 5     | 1989.484      | 6.631  | 44    | 452.249       | 1.507  |
| 6     | 1987.012      | 6.622  | 45    | 438.514       | 1.461  |
| 7     | 1980.968      | 6.602  | 46    | 427.526       | 1.425  |
| 8     | 1978.496      | 6.594  | 47    | 419.560       | 1.398  |
| 9     | 1963.368      | 6.544  | 48    | 416.263       | 1.387  |
| 10    | 1110.162      | 3.700  | 49    | 407.473       | 1.358  |
| 11    | 1109.063      | 3.696  | 50    | 404.176       | 1.347  |
| 12    | 1101.371      | 3.671  | 51    | 399.781       | 1.332  |
| 13    | 1093.130      | 3.643  | 52    | 395.386       | 1.318  |
| 14    | 1084.889      | 3.616  | 53    | 389.617       | 1.299  |
| 15    | 817.054       | 2.723  | 54    | 384.123       | 1.280  |
| 16    | 812.659       | 2.708  | 55    | 378.080       | 1.260  |
| 17    | 807.989       | 2.693  | 56    | 373.135       | 1.244  |
| 18    | 800.847       | 2.669  | 57    | 366.268       | 1.221  |
| 19    | 796.177       | 2.654  | 58    | 362.971       | 1.210  |
| 20    | 791.507       | 2.638  | 59    | 347.038       | 1.157  |
| 21    | 737.116       | 2.457  | 60    | 335.501       | 1.118  |
| 22    | 724.480       | 2.415  | 61    | 323.689       | 1.079  |
| 23    | 711.019       | 2.370  | 62    | 312.426       | 1.041  |
| 24    | 695.636       | 2.318  | 63    | 256.936       | 0.856  |
| 25    | 621.741       | 2.072  | 64    | 244.849       | 0.816  |
| 26    | 613.500       | 2.045  | 65    | 237.157       | 0.790  |
| 27    | 608.555       | 2.028  | 66    | 232.762       | 0.776  |
| 28    | 604.984       | 2.016  | 67    | 220.950       | 0.736  |
| 29    | 600.314       | 2.001  |       |               |        |
| 30    | 597.252       | 1.991  |       |               |        |
| 31    | 573.668       | 1.912  |       |               |        |
| 32    | 569.822       | 1.899  |       |               |        |
| 33    | 561.306       | 1.871  |       |               |        |
| 34    | 557.460       | 1.858  |       |               |        |
| 35    | 537.407       | 1.791  |       |               |        |
| 36    | 494.828       | 1.649  |       |               |        |
| 37    | 482.741       | 1.609  |       |               |        |
| 38    | 479.170       | 1.597  |       |               |        |
| 39    | 473.951       | 1.580  |       |               |        |

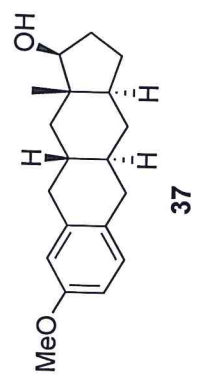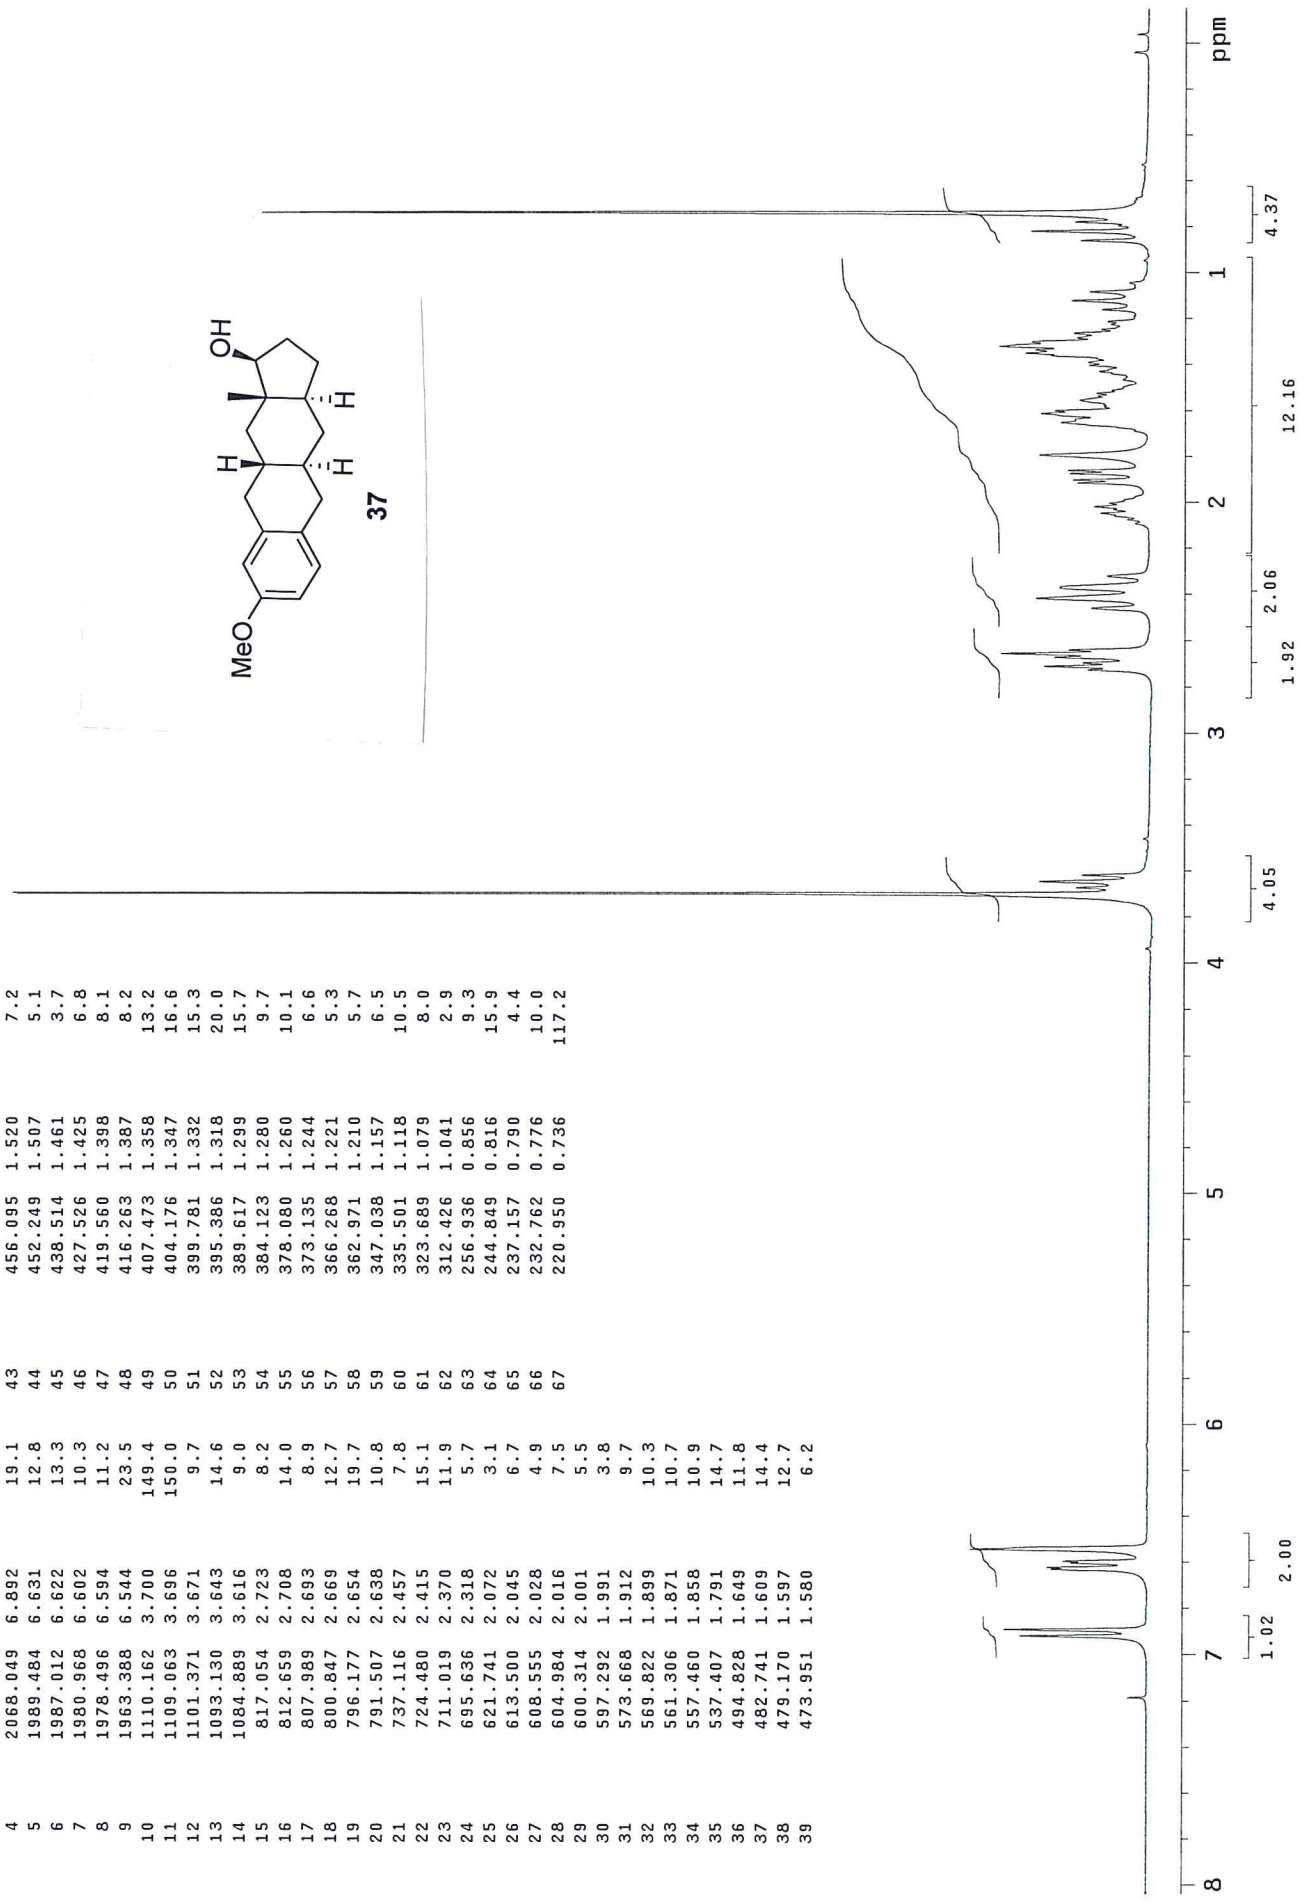

| INDEX | FREQUENCY | PPM     | HEIGHT |
|-------|-----------|---------|--------|
| 1     | 11887.142 | 157.556 | 5.7    |
| 2     | 10414.421 | 138.036 | 8.2    |
| 3     | 9775.403  | 129.567 | 18.2   |
| 4     | 9735.321  | 129.035 | 7.9    |
| 5     | 8552.335  | 113.356 | 14.0   |
| 6     | 8448.122  | 111.974 | 18.3   |
| 7     | 6177.201  | 81.875  | 17.7   |
| 8     | 5857.691  | 77.640  | 4.8    |
| 9     | 5825.626  | 77.215  | 4.6    |
| 10    | 5793.560  | 76.790  | 4.5    |
| 11    | 4174.255  | 55.327  | 16.3   |
| 12    | 3376.054  | 44.747  | 17.4   |
| 13    | 3354.296  | 44.459  | 17.8   |
| 14    | 3298.181  | 43.715  | 10.8   |
| 15    | 3030.205  | 40.163  | 17.4   |
| 16    | 2901.944  | 38.463  | 18.5   |
| 17    | 2771.391  | 36.733  | 15.1   |
| 18    | 2613.355  | 34.638  | 18.8   |
| 19    | 2483.947  | 32.923  | 15.9   |
| 20    | 2299.571  | 30.479  | 17.4   |
| 21    | 1927.383  | 25.546  | 18.6   |
| 22    | 846.319   | 11.217  | 15.7   |

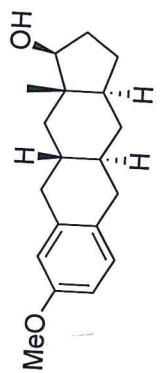

37

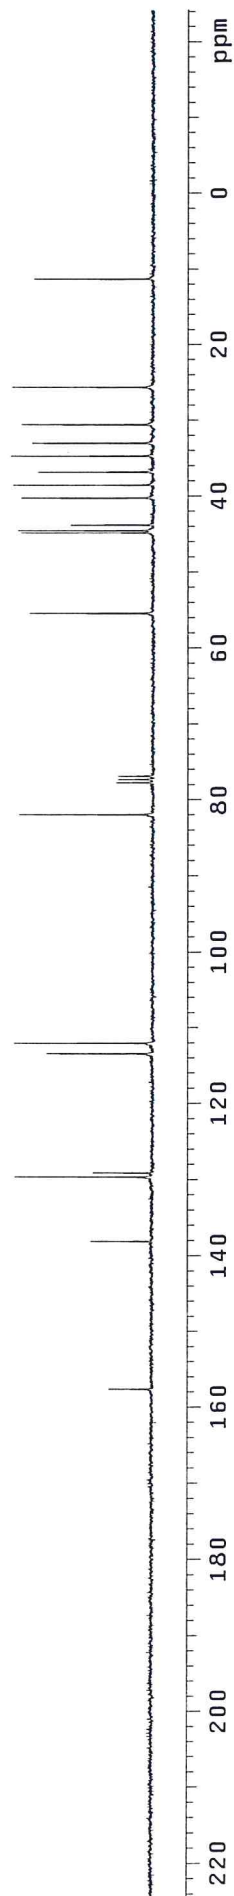





| INDEX | FREQUENCY | PPM     | HEIGHT |
|-------|-----------|---------|--------|
| 1     | 11213.594 | 148.629 | 9.9    |
| 2     | 8091.793  | 107.251 | 11.6   |
| 3     | 5968.602  | 79.110  | 15.3   |
| 4     | 5809.420  | 77.000  | 2.6    |
| 5     | 5777.354  | 76.575  | 2.8    |
| 6     | 5470.442  | 72.507  | 15.3   |
| 7     | 5440.667  | 72.112  | 8.3    |
| 8     | 3394.204  | 44.988  | 13.9   |
| 9     | 3311.750  | 43.895  | 11.5   |
| 10    | 3251.055  | 43.091  | 15.1   |
| 11    | 2678.457  | 35.501  | 12.9   |
| 12    | 2384.142  | 31.600  | 15.1   |
| 13    | 2157.394  | 28.595  | 3.7    |
| 14    | 2149.377  | 28.489  | 50.0   |
| 15    | 1871.095  | 24.800  | 15.1   |
| 16    | 810.644   | 10.745  | 13.9   |

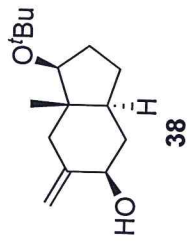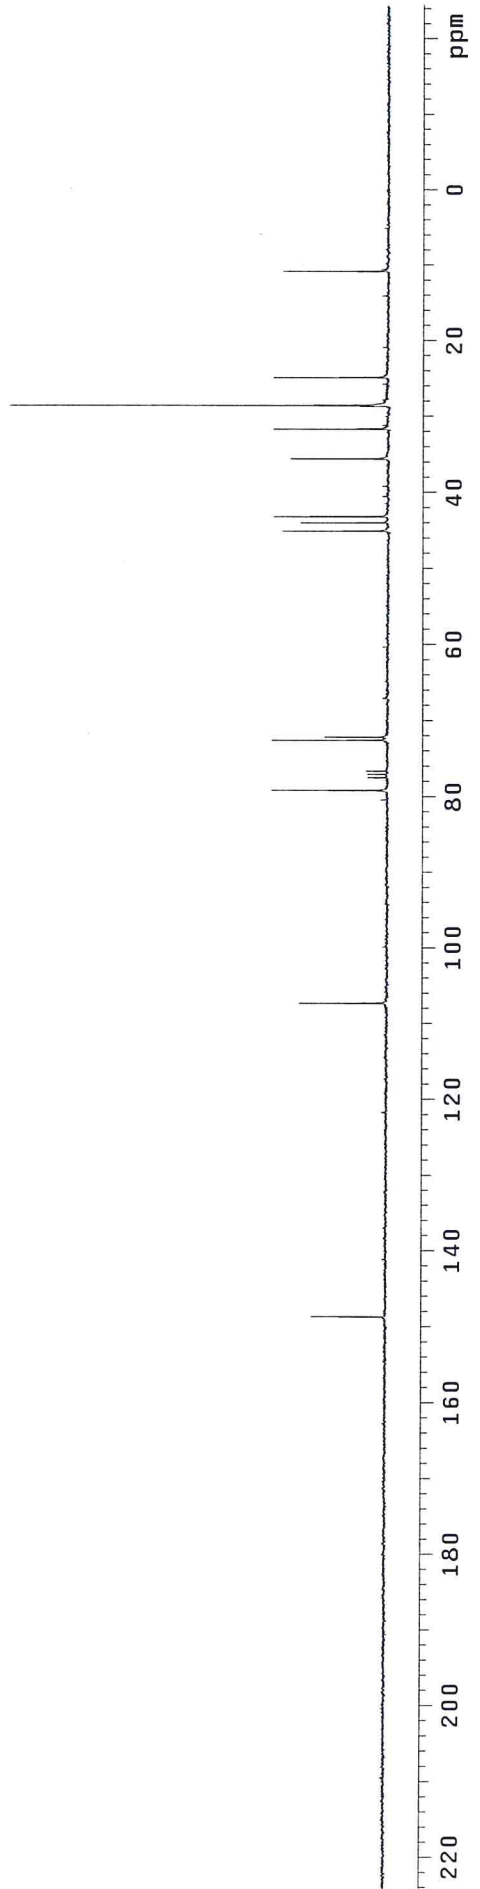

mq2046

Pulse Sequence: s2pu1

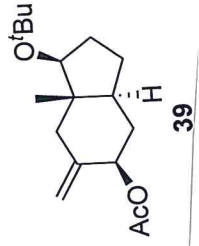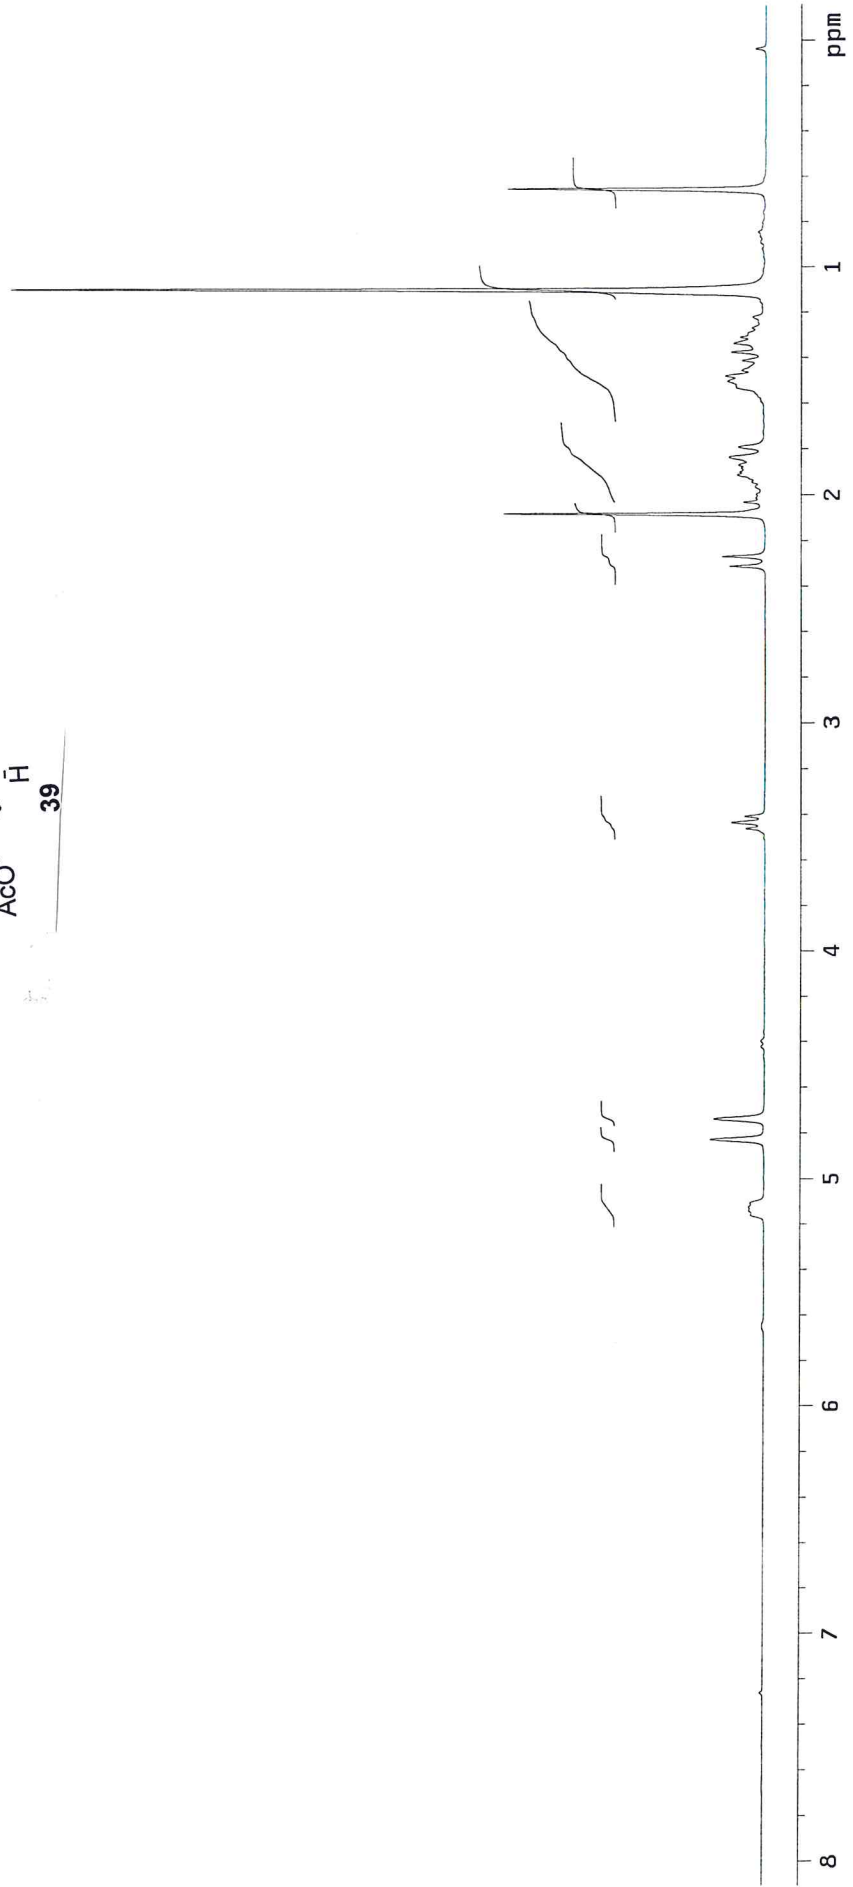

| INDEX | FREQUENCY | PPM     | HEIGHT |
|-------|-----------|---------|--------|
| 1     | 12827.173 | 170.016 | 4.2    |
| 2     | 10837.970 | 143.650 | 8.0    |
| 3     | 8142.181  | 107.919 | 13.1   |
| 4     | 5960.585  | 79.004  | 13.4   |
| 5     | 5841.485  | 77.425  | 5.4    |
| 6     | 5809.419  | 77.000  | 5.8    |
| 7     | 5777.354  | 76.575  | 5.9    |
| 8     | 5575.800  | 73.904  | 11.2   |
| 9     | 5449.828  | 72.234  | 8.3    |
| 10    | 3406.801  | 45.155  | 12.5   |
| 11    | 3302.588  | 43.774  | 6.9    |
| 12    | 3228.150  | 42.787  | 15.9   |
| 13    | 2417.352  | 32.040  | 15.3   |
| 14    | 2387.577  | 31.646  | 15.4   |
| 15    | 2161.974  | 28.656  | 4.2    |
| 16    | 2153.958  | 28.549  | 45.0   |
| 17    | 1871.094  | 24.800  | 15.7   |
| 18    | 1583.651  | 20.990  | 11.2   |
| 19    | 811.789   | 10.760  | 16.2   |

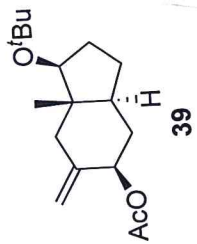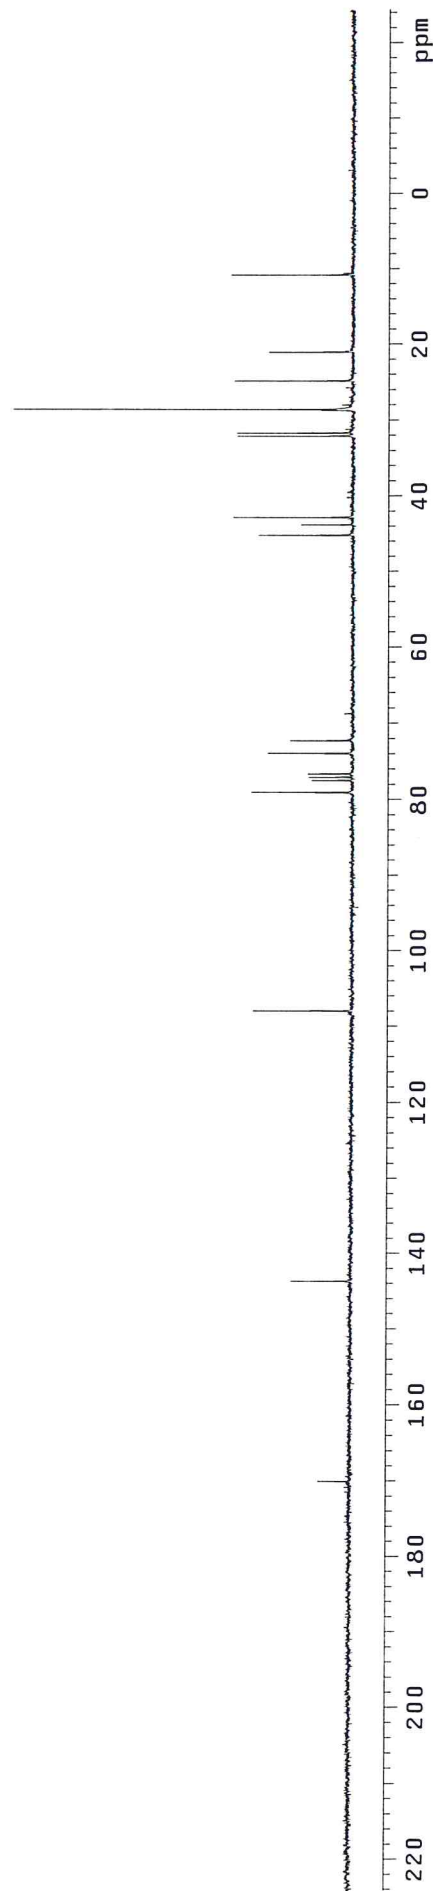

| INDEX | FREQUENCY PPM | HEIGHT | INDEX | FREQUENCY PPM | HEIGHT |
|-------|---------------|--------|-------|---------------|--------|
| 1     | 1525.102      | 2.0    | 40    | 462.279       | 1.4    |
| 2     | 1517.960      | 2.2    | 41    | 461.180       | 1.4    |
| 3     | 1513.565      | 2.2    | 42    | 454.862       | 1.0    |
| 4     | 1506.423      | 2.0    | 43    | 451.290       | 1.4    |
| 5     | 1076.238      | 2.2    | 44    | 449.642       | 1.1    |
| 6     | 1068.547      | 3.2    | 45    | 447.719       | 1.2    |
| 7     | 1060.031      | 2.0    | 46    | 443.599       | 1.2    |
| 8     | 716.653       | 4.3    | 47    | 441.951       | 1.0    |
| 9     | 703.467       | 5.9    | 48    | 440.028       | 1.2    |
| 10    | 640.286       | 3.8    | 49    | 437.830       | 1.1    |
| 11    | 630.946       | 1.8    | 50    | 434.534       | 1.0    |
| 12    | 627.375       | 2.091  | 51    | 430.138       | 1.0    |
| 13    | 623.804       | 2.079  | 52    | 427.391       | 1.0    |
| 14    | 618.859       | 2.063  | 53    | 421.073       | 1.1    |
| 15    | 615.288       | 2.051  | 54    | 415.304       | 0.9    |
| 16    | 611.991       | 3.4    | 55    | 409.536       | 1.9    |
| 17    | 608.420       | 2.028  | 56    | 403.492       | 1.5    |
| 18    | 604.025       | 2.013  | 57    | 397.723       | 1.4    |
| 19    | 598.904       | 1.4    | 58    | 391.955       | 1.3    |
| 20    | 598.531       | 1.995  | 59    | 346.629       | 1.1    |
| 21    | 594.136       | 1.980  | 60    | 308.445       | 1.0    |
| 22    | 591.114       | 1.970  | 61    | 187.851       | 25.0   |
| 23    | 588.916       | 1.963  |       |               |        |
| 24    | 584.786       | 1.949  |       |               |        |
| 25    | 580.950       | 1.936  |       |               |        |
| 26    | 576.005       | 1.920  |       |               |        |
| 27    | 572.709       | 1.909  |       |               |        |
| 28    | 570.786       | 1.902  |       |               |        |
| 29    | 567.215       | 1.890  |       |               |        |
| 30    | 563.369       | 1.878  |       |               |        |
| 31    | 560.073       | 1.867  |       |               |        |
| 32    | 515.846       | 1.719  |       |               |        |
| 33    | 503.759       | 1.679  |       |               |        |
| 34    | 491.397       | 1.638  |       |               |        |
| 35    | 485.628       | 1.619  |       |               |        |
| 36    | 479.310       | 1.597  |       |               |        |
| 37    | 472.992       | 1.576  |       |               |        |
| 38    | 470.520       | 1.568  |       |               |        |
| 39    | 468.597       | 1.562  |       |               |        |

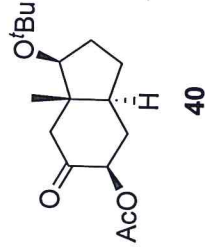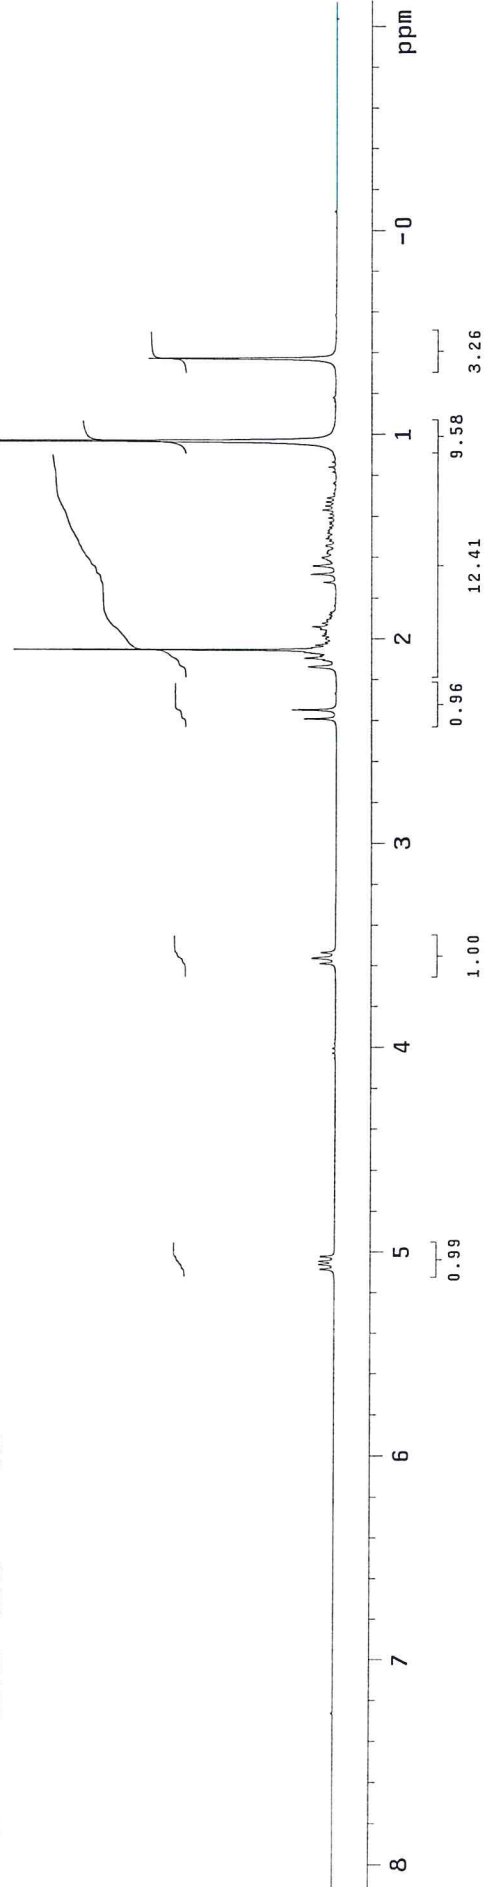

| INDEX | FREQUENCY | PPM     | HEIGHT |
|-------|-----------|---------|--------|
| 1     | 15394.874 | 204.049 | 3.6    |
| 2     | 12818.185 | 169.897 | 3.1    |
| 3     | 5937.855  | 78.702  | 8.8    |
| 4     | 5857.691  | 77.640  | 3.0    |
| 5     | 5825.626  | 77.215  | 3.4    |
| 6     | 5793.561  | 76.790  | 3.1    |
| 7     | 5717.978  | 75.788  | 9.4    |
| 8     | 5475.196  | 72.570  | 7.4    |
| 9     | 3869.633  | 51.289  | 11.0   |
| 10    | 3544.398  | 46.979  | 7.6    |
| 11    | 3149.306  | 41.742  | 10.7   |
| 12    | 2428.978  | 32.195  | 9.4    |
| 13    | 2325.911  | 30.828  | 10.6   |
| 14    | 2152.986  | 28.536  | 36.7   |
| 15    | 1849.510  | 24.514  | 8.8    |
| 16    | 1559.775  | 20.674  | 8.3    |
| 17    | 877.239   | 11.627  | 12.2   |

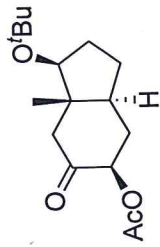

40

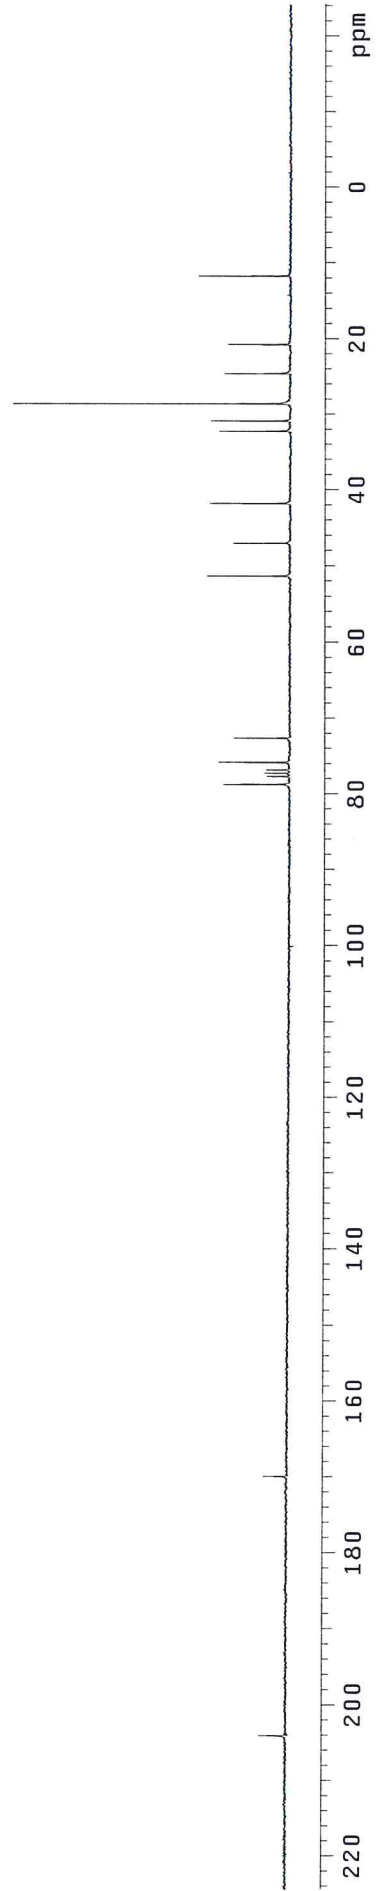

| INDEX | FREQUENCY PPM | HEIGHT | INDEX | FREQUENCY PPM | HEIGHT |
|-------|---------------|--------|-------|---------------|--------|
| 1     | 1047.530      | 3.491  | 40    | 423.131       | 1.410  |
| 2     | 1039.563      | 3.465  | 41    | 421.208       | 1.404  |
| 3     | 1031.047      | 3.436  | 42    | 416.813       | 1.389  |
| 4     | 675.857       | 2.253  | 43    | 415.439       | 1.385  |
| 5     | 674.209       | 2.247  | 44    | 413.242       | 1.377  |
| 6     | 666.243       | 2.220  | 45    | 411.319       | 1.371  |
| 7     | 662.397       | 2.208  | 46    | 373.135       | 1.244  |
| 8     | 660.474       | 2.201  | 47    | 367.092       | 1.223  |
| 9     | 657.727       | 2.192  | 48    | 361.598       | 1.205  |
| 10    | 656.079       | 2.187  | 49    | 355.554       | 1.185  |
| 11    | 654.156       | 2.180  | 50    | 289.076       | 0.963  |
| 12    | 652.507       | 2.175  | 51    | 161.065       | 0.537  |
| 13    | 650.859       | 2.169  |       |               |        |
| 14    | 631.081       | 2.103  |       |               |        |
| 15    | 625.861       | 2.086  |       |               |        |
| 16    | 618.719       | 2.062  |       |               |        |
| 17    | 583.557       | 1.945  |       |               |        |
| 18    | 573.393       | 1.911  |       |               |        |
| 19    | 569.822       | 1.899  |       |               |        |
| 20    | 563.229       | 1.877  |       |               |        |
| 21    | 560.482       | 1.868  |       |               |        |
| 22    | 554.439       | 1.848  |       |               |        |
| 23    | 522.848       | 1.743  |       |               |        |
| 24    | 521.200       | 1.737  |       |               |        |
| 25    | 519.552       | 1.732  |       |               |        |
| 26    | 515.706       | 1.719  |       |               |        |
| 27    | 513.508       | 1.711  |       |               |        |
| 28    | 511.310       | 1.704  |       |               |        |
| 29    | 506.091       | 1.687  |       |               |        |
| 30    | 502.245       | 1.674  |       |               |        |
| 31    | 458.293       | 1.527  |       |               |        |
| 32    | 454.996       | 1.516  |       |               |        |
| 33    | 451.151       | 1.504  |       |               |        |
| 34    | 448.129       | 1.494  |       |               |        |
| 35    | 445.657       | 1.485  |       |               |        |
| 36    | 440.162       | 1.467  |       |               |        |
| 37    | 436.042       | 1.453  |       |               |        |
| 38    | 428.350       | 1.428  |       |               |        |
| 39    | 424.779       | 1.416  |       |               |        |

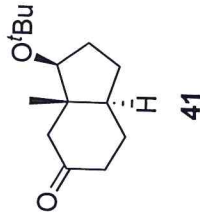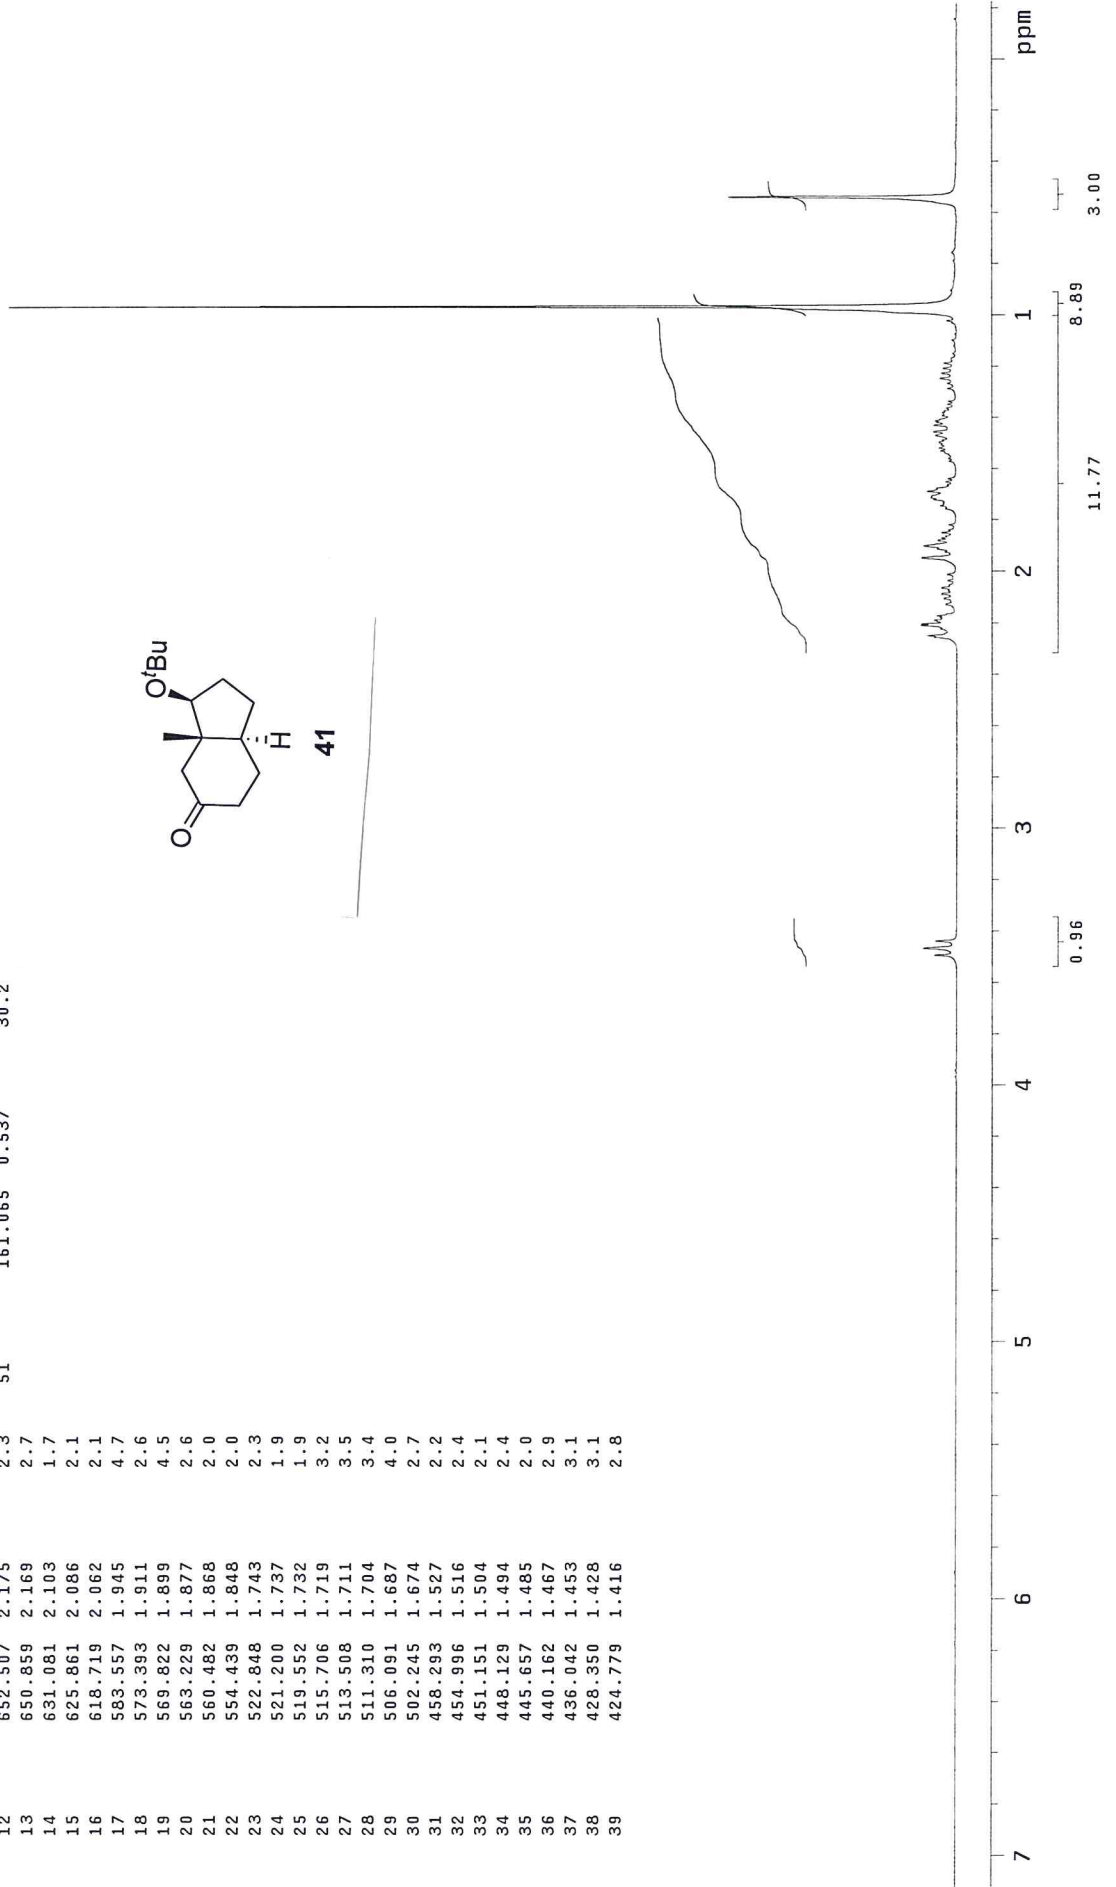

| INDEX | FREQUENCY | PPM     | HEIGHT |
|-------|-----------|---------|--------|
| 1     | 15994.956 | 212.003 | 5.2    |
| 2     | 5977.937  | 79.234  | 16.7   |
| 3     | 5857.691  | 77.640  | 4.9    |
| 4     | 5825.626  | 77.215  | 4.9    |
| 5     | 5793.560  | 76.790  | 5.0    |
| 6     | 5464.890  | 72.433  | 8.7    |
| 7     | 4055.155  | 53.748  | 22.3   |
| 8     | 3503.171  | 46.432  | 8.4    |
| 9     | 3261.535  | 43.229  | 17.5   |
| 10    | 3061.126  | 40.573  | 21.9   |
| 11    | 2424.397  | 32.134  | 20.2   |
| 12    | 2159.857  | 28.627  | 73.0   |
| 13    | 1891.882  | 25.076  | 23.0   |
| 14    | 1872.413  | 24.818  | 21.6   |
| 15    | 887.546   | 11.764  | 19.8   |

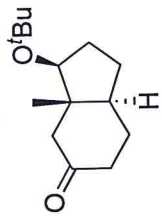

41

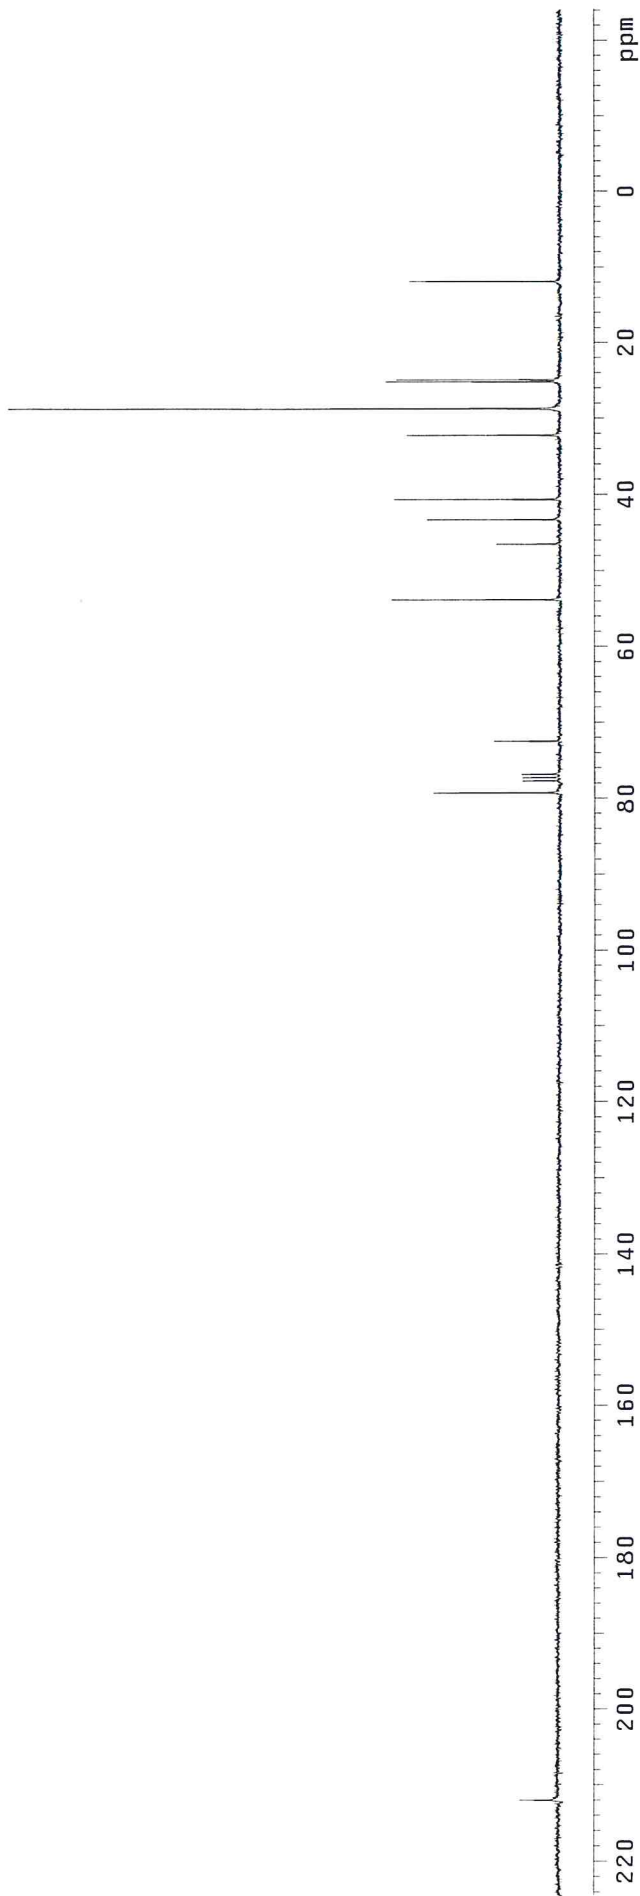

| INDEX | FREQUENCY | PPM    | HEIGHT |
|-------|-----------|--------|--------|
| 1     | 3652.808  | 12.174 | 9.6    |
| 2     | 1089.010  | 3.629  | 42.3   |
| 3     | 309.129   | 1.030  | 107.1  |
| 4     | 186.887   | 0.623  | 27.4   |

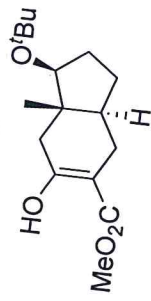

42

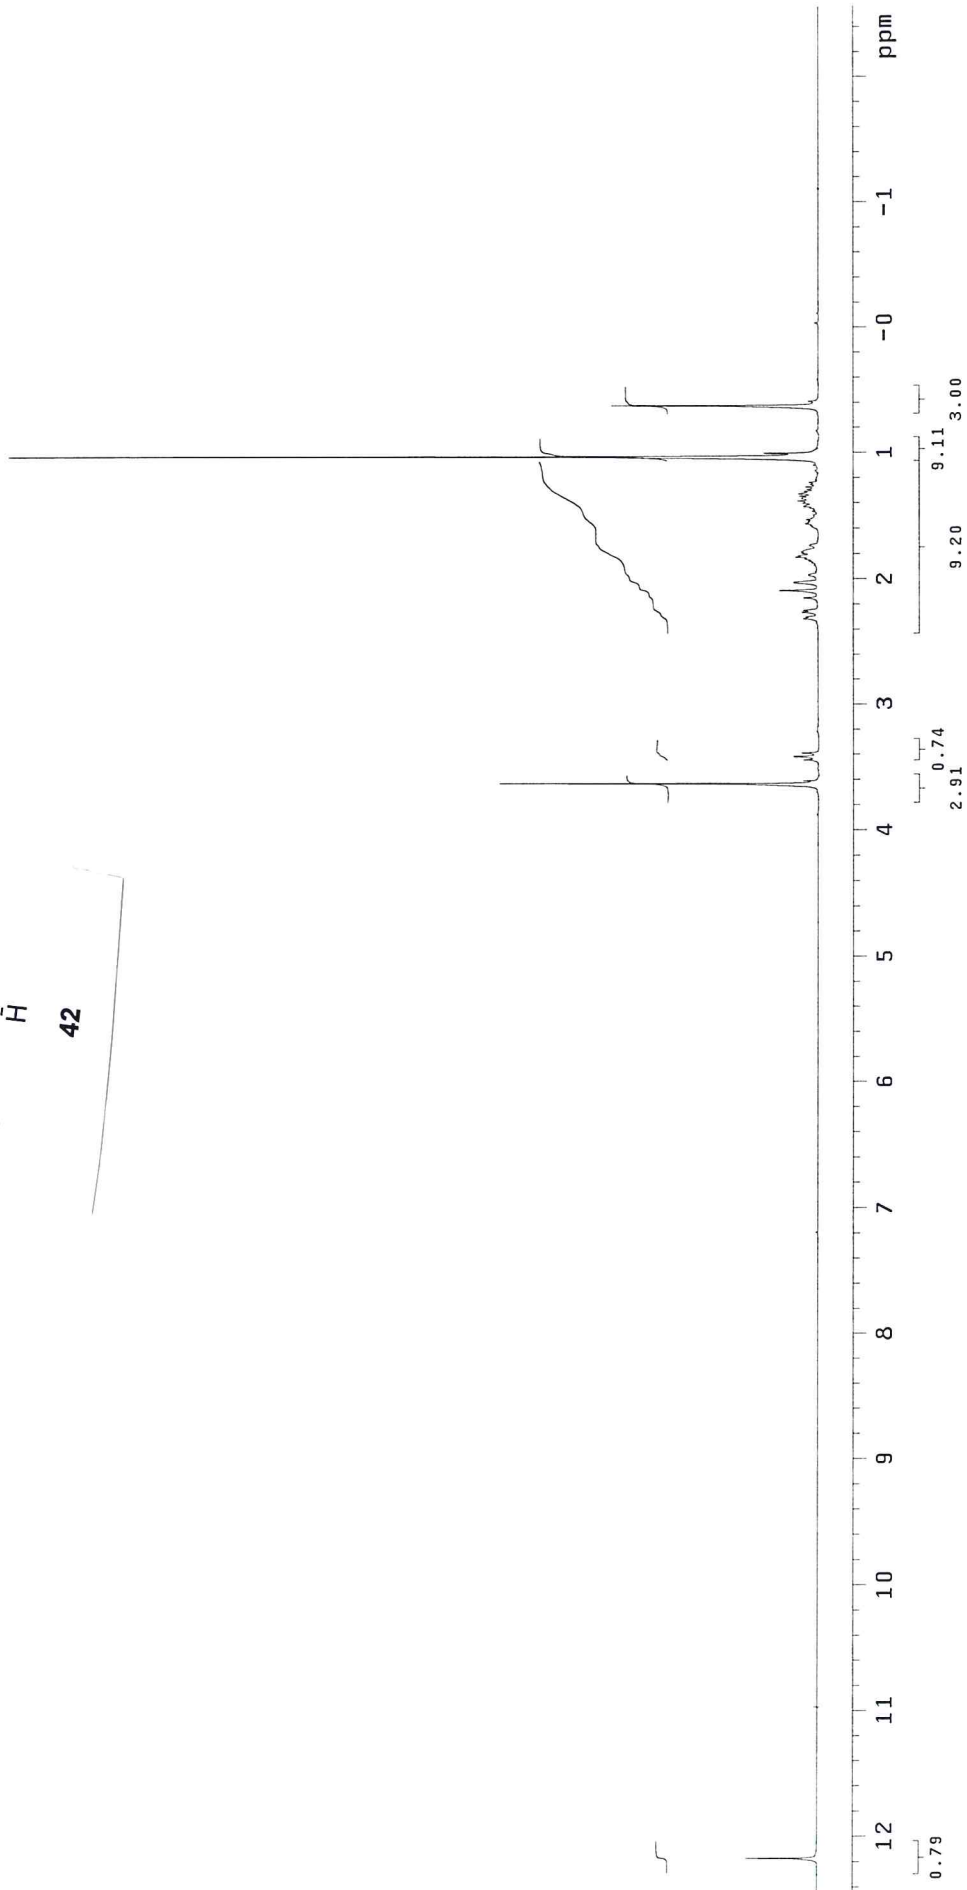



| INDEX | FREQUENCY | PPM     | HEIGHT |
|-------|-----------|---------|--------|
| 1     | 13065.547 | 173.175 | 4.6    |
| 2     | 13044.933 | 172.902 | 9.9    |
| 3     | 7301.782  | 96.780  | 5.7    |
| 4     | 6054.664  | 80.251  | 13.8   |
| 5     | 5858.836  | 77.655  | 3.5    |
| 6     | 5826.771  | 77.230  | 3.8    |
| 7     | 5794.705  | 76.805  | 3.4    |
| 8     | 5467.180  | 72.464  | 6.9    |
| 9     | 3877.649  | 51.396  | 8.6    |
| 10    | 3226.033  | 42.759  | 13.3   |
| 11    | 3161.902  | 41.909  | 8.5    |
| 12    | 3055.399  | 40.497  | 12.9   |
| 13    | 2382.025  | 31.572  | 14.8   |
| 14    | 2172.454  | 28.794  | 48.0   |
| 15    | 2164.438  | 28.688  | 3.2    |
| 16    | 1936.544  | 25.668  | 15.6   |
| 17    | 1872.413  | 24.818  | 13.6   |
| 18    | 841.738   | 11.157  | 14.6   |

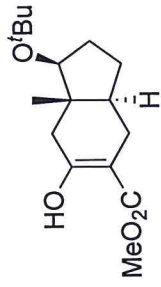

42

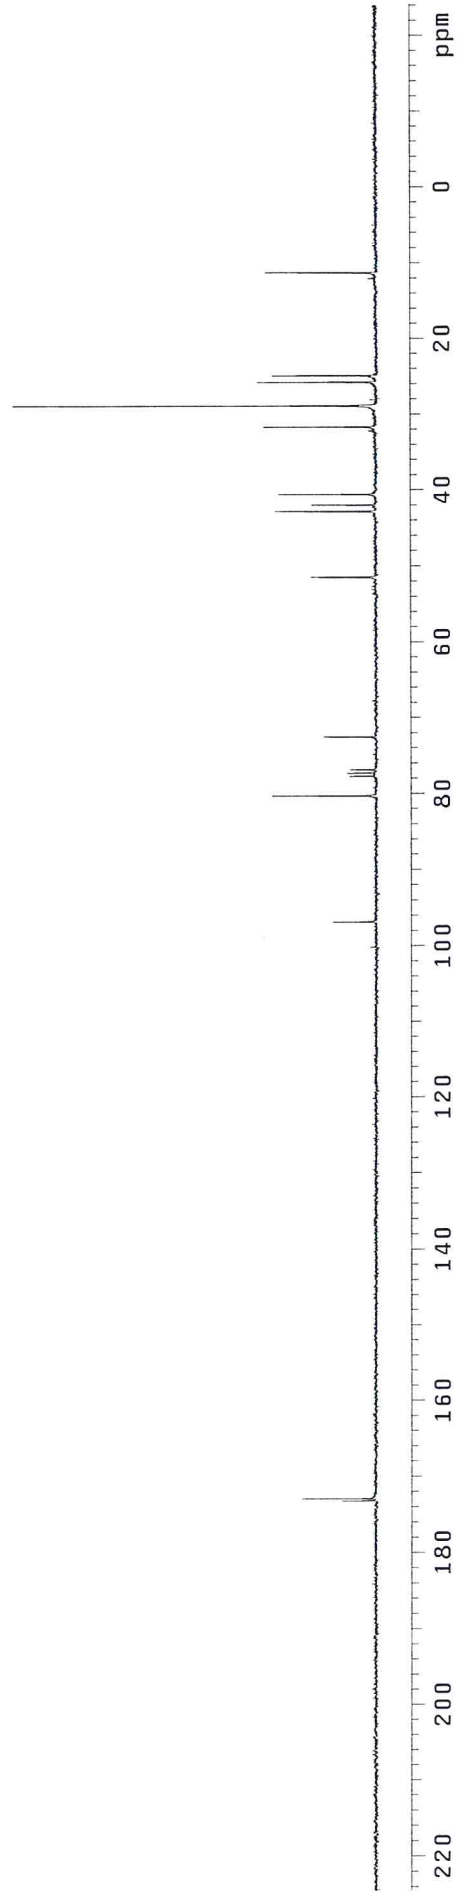

| INDEX | FREQUENCY | PPM   | HEIGHT | INDEX | FREQUENCY | PPM   | HEIGHT | INDEX | FREQUENCY | PPM    | HEIGHT | INDEX | FREQUENCY | PPM    | HEIGHT | INDEX | FREQUENCY | PPM    | HEIGHT | INDEX | FREQUENCY | PPM    | HEIGHT |
|-------|-----------|-------|--------|-------|-----------|-------|--------|-------|-----------|--------|--------|-------|-----------|--------|--------|-------|-----------|--------|--------|-------|-----------|--------|--------|
| 1     | 2134.802  | 7.115 | 1.4    | 40    | 897.817   | 2.992 | 3.1    | 79    | 302.537   | 1.008  | 13.0   | 80    | 884.082   | 2.946  | 2.3    | 81    | 212.709   | 0.709  | 15.9   | 82    | 199.248   | 0.664  | 3.0    |
| 2     | 2127.110  | 7.089 | 3.2    | 41    | 884.082   | 2.946 | 2.3    | 81    | 212.709   | 0.709  | 15.9   | 82    | 199.248   | 0.664  | 3.0    | 83    | 197.326   | 0.658  | 3.0    | 84    | 193.480   | 0.645  | 3.9    |
| 3     | 2122.166  | 7.073 | 2.0    | 42    | 716.238   | 2.387 | 1.8    | 80    | 212.709   | 0.709  | 15.9   | 81    | 199.248   | 0.664  | 3.0    | 82    | 197.326   | 0.658  | 3.0    | 83    | 193.480   | 0.645  | 3.9    |
| 4     | 2120.243  | 7.066 | 2.1    | 43    | 701.954   | 2.339 | 1.8    | 80    | 212.709   | 0.709  | 15.9   | 81    | 199.248   | 0.664  | 3.0    | 82    | 197.326   | 0.658  | 3.0    | 83    | 193.480   | 0.645  | 3.9    |
| 5     | 2118.869  | 7.062 | 2.0    | 44    | 680.252   | 2.267 | 1.6    | 80    | 212.709   | 0.709  | 15.9   | 81    | 199.248   | 0.664  | 3.0    | 82    | 197.326   | 0.658  | 3.0    | 83    | 193.480   | 0.645  | 3.9    |
| 6     | 2114.749  | 7.048 | 1.1    | 45    | 665.968   | 2.220 | 1.1    | 84    | 192.106   | 0.640  | 3.4    | 85    | 190.183   | 0.634  | 3.4    | 86    | -0.460    | -0.002 | 1.2    | 87    | -2.108    | -0.007 | 1.5    |
| 7     | 2021.624  | 6.738 | 7.5    | 46    | 637.674   | 2.125 | 1.6    | 85    | 190.183   | 0.634  | 3.4    | 86    | -0.460    | -0.002 | 1.2    | 87    | -2.108    | -0.007 | 1.5    |       |           |        |        |
| 8     | 2020.251  | 6.733 | 6.8    | 47    | 624.213   | 2.080 | 2.8    | 86    | -0.460    | -0.002 | 1.2    | 87    | -2.108    | -0.007 | 1.5    |       |           |        |        |       |           |        |        |
| 9     | 2012.834  | 6.708 | 3.5    | 48    | 618.994   | 2.063 | 7.8    | 87    | -2.108    | -0.007 | 1.5    |       |           |        |        |       |           |        |        |       |           |        |        |
| 10    | 2010.636  | 6.701 | 3.4    | 49    | 617.071   | 2.057 | 10.6   |       |           |        |        |       |           |        |        |       |           |        |        |       |           |        |        |
| 11    | 2008.988  | 6.696 | 2.9    | 50    | 611.302   | 2.037 | 2.2    |       |           |        |        |       |           |        |        |       |           |        |        |       |           |        |        |
| 12    | 2001.571  | 6.671 | 2.6    | 51    | 587.403   | 1.958 | 1.2    |       |           |        |        |       |           |        |        |       |           |        |        |       |           |        |        |
| 13    | 1993.605  | 6.644 | 2.1    | 52    | 582.733   | 1.942 | 1.6    |       |           |        |        |       |           |        |        |       |           |        |        |       |           |        |        |
| 14    | 1986.737  | 6.621 | 1.9    | 53    | 580.810   | 1.936 | 1.6    |       |           |        |        |       |           |        |        |       |           |        |        |       |           |        |        |
| 15    | 1985.364  | 6.617 | 1.9    | 54    | 579.162   | 1.930 | 1.3    |       |           |        |        |       |           |        |        |       |           |        |        |       |           |        |        |
| 16    | 1977.397  | 6.590 | 1.7    | 55    | 573.118   | 1.910 | 1.4    |       |           |        |        |       |           |        |        |       |           |        |        |       |           |        |        |
| 17    | 1114.557  | 3.715 | 3.0    | 56    | 564.328   | 1.881 | 1.5    |       |           |        |        |       |           |        |        |       |           |        |        |       |           |        |        |
| 18    | 1112.909  | 3.709 | 4.3    | 57    | 559.933   | 1.866 | 1.5    |       |           |        |        |       |           |        |        |       |           |        |        |       |           |        |        |
| 19    | 1110.162  | 3.700 | 1.9    | 58    | 555.538   | 1.851 | 1.3    |       |           |        |        |       |           |        |        |       |           |        |        |       |           |        |        |
| 20    | 1101.921  | 3.672 | 35.1   | 59    | 548.121   | 1.827 | 1.3    |       |           |        |        |       |           |        |        |       |           |        |        |       |           |        |        |
| 21    | 1099.448  | 3.664 | 26.7   | 60    | 517.354   | 1.724 | 2.9    |       |           |        |        |       |           |        |        |       |           |        |        |       |           |        |        |
| 22    | 1090.658  | 3.635 | 2.2    | 61    | 503.619   | 1.678 | 2.3    |       |           |        |        |       |           |        |        |       |           |        |        |       |           |        |        |
| 23    | 1085.164  | 3.617 | 1.5    | 62    | 453.623   | 1.512 | 1.8    |       |           |        |        |       |           |        |        |       |           |        |        |       |           |        |        |
| 24    | 1083.516  | 3.611 | 1.5    | 63    | 446.481   | 1.488 | 2.4    |       |           |        |        |       |           |        |        |       |           |        |        |       |           |        |        |
| 25    | 1067.583  | 3.558 | 1.8    | 64    | 436.317   | 1.454 | 1.7    |       |           |        |        |       |           |        |        |       |           |        |        |       |           |        |        |
| 26    | 1064.012  | 3.546 | 2.9    | 65    | 395.661   | 1.319 | 1.2    |       |           |        |        |       |           |        |        |       |           |        |        |       |           |        |        |
| 27    | 1062.364  | 3.541 | 4.2    | 66    | 383.848   | 1.279 | 1.5    |       |           |        |        |       |           |        |        |       |           |        |        |       |           |        |        |
| 28    | 1060.166  | 3.533 | 3.2    | 67    | 378.629   | 1.262 | 1.6    |       |           |        |        |       |           |        |        |       |           |        |        |       |           |        |        |
| 29    | 1052.749  | 3.509 | 3.1    | 68    | 372.036   | 1.240 | 1.6    |       |           |        |        |       |           |        |        |       |           |        |        |       |           |        |        |
| 30    | 1051.101  | 3.503 | 3.9    | 69    | 366.817   | 1.223 | 1.4    |       |           |        |        |       |           |        |        |       |           |        |        |       |           |        |        |
| 31    | 1048.354  | 3.494 | 3.1    | 70    | 353.357   | 1.178 | 1.4    |       |           |        |        |       |           |        |        |       |           |        |        |       |           |        |        |
| 32    | 1046.431  | 3.488 | 3.6    | 71    | 348.137   | 1.160 | 1.8    |       |           |        |        |       |           |        |        |       |           |        |        |       |           |        |        |
| 33    | 1041.761  | 3.472 | 3.2    | 72    | 346.489   | 1.155 | 2.3    |       |           |        |        |       |           |        |        |       |           |        |        |       |           |        |        |
| 34    | 1040.113  | 3.466 | 5.0    | 73    | 344.566   | 1.148 | 1.7    |       |           |        |        |       |           |        |        |       |           |        |        |       |           |        |        |
| 35    | 1038.484  | 3.461 | 3.0    | 74    | 340.995   | 1.136 | 1.1    |       |           |        |        |       |           |        |        |       |           |        |        |       |           |        |        |
| 36    | 1031.047  | 3.436 | 1.6    | 75    | 339.347   | 1.131 | 1.1    |       |           |        |        |       |           |        |        |       |           |        |        |       |           |        |        |
| 37    | 1029.399  | 3.431 | 1.9    | 76    | 314.349   | 1.048 | 50.8   |       |           |        |        |       |           |        |        |       |           |        |        |       |           |        |        |
| 38    | 981.052   | 3.270 | 2.2    | 77    | 312.701   | 1.042 | 64.9   |       |           |        |        |       |           |        |        |       |           |        |        |       |           |        |        |
| 39    | 967.316   | 3.224 | 3.0    | 78    | 303.910   | 1.013 | 11.1   |       |           |        |        |       |           |        |        |       |           |        |        |       |           |        |        |

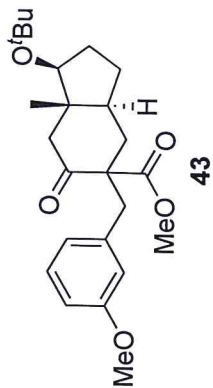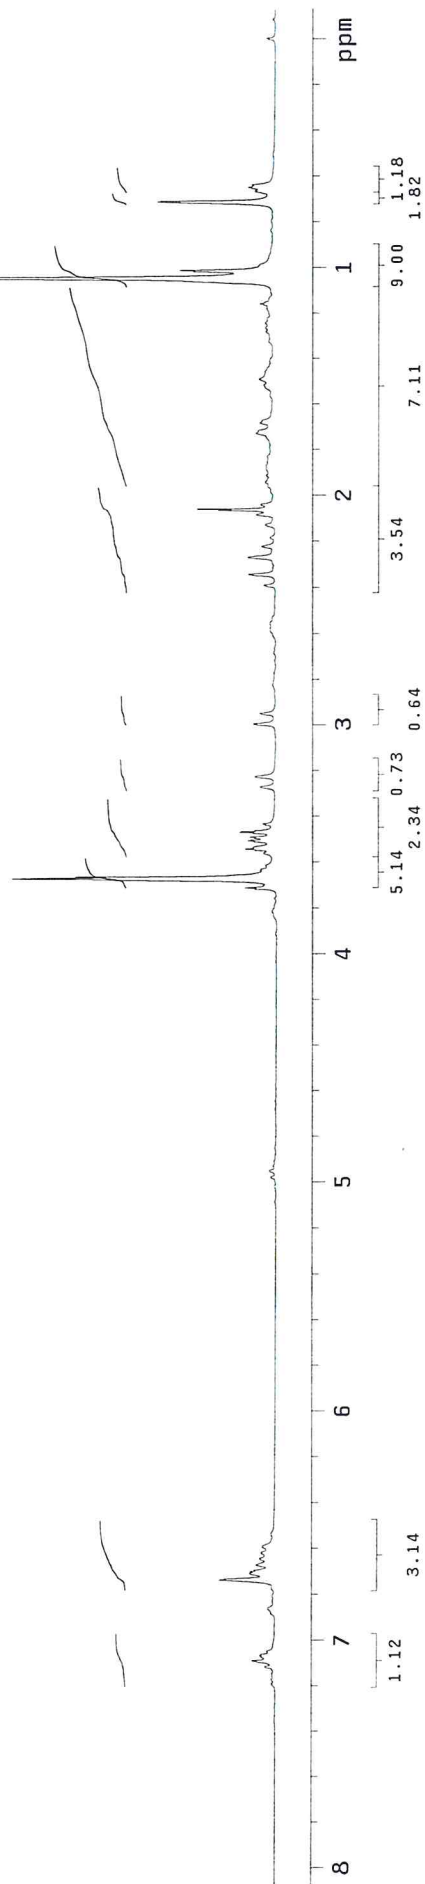

| INDEX | FREQUENCY | PPM     | HEIGHT |
|-------|-----------|---------|--------|
| 1     | 15786.530 | 209.240 | 7.5    |
| 2     | 13026.611 | 172.659 | 6.6    |
| 3     | 12039.453 | 159.575 | 9.2    |
| 4     | 10386.937 | 137.672 | 10.8   |
| 5     | 9758.225  | 129.339 | 6.6    |
| 6     | 9750.209  | 129.233 | 19.3   |
| 7     | 9271.517  | 122.888 | 17.0   |
| 8     | 9140.965  | 121.157 | 6.3    |
| 9     | 8777.938  | 116.346 | 17.5   |
| 10    | 8479.042  | 112.384 | 18.7   |
| 11    | 5982.518  | 79.294  | 17.2   |
| 12    | 5857.692  | 77.640  | 7.9    |
| 13    | 5825.626  | 77.215  | 8.3    |
| 14    | 5793.561  | 76.790  | 8.4    |
| 15    | 5477.487  | 72.600  | 10.1   |
| 16    | 4695.319  | 62.233  | 11.6   |
| 17    | 4160.513  | 55.145  | 19.9   |
| 18    | 3948.652  | 52.337  | 13.8   |
| 19    | 3890.247  | 51.563  | 17.1   |
| 20    | 3508.897  | 46.508  | 13.0   |
| 21    | 2919.122  | 38.691  | 21.7   |
| 22    | 2913.396  | 38.615  | 17.6   |
| 23    | 2403.784  | 31.861  | 17.5   |
| 24    | 2308.733  | 30.601  | 16.3   |
| 25    | 2175.890  | 28.840  | 18.5   |
| 26    | 2162.148  | 28.658  | 59.8   |
| 27    | 1889.592  | 25.045  | 16.6   |
| 28    | 911.595   | 12.083  | 18.8   |

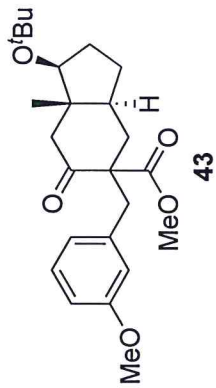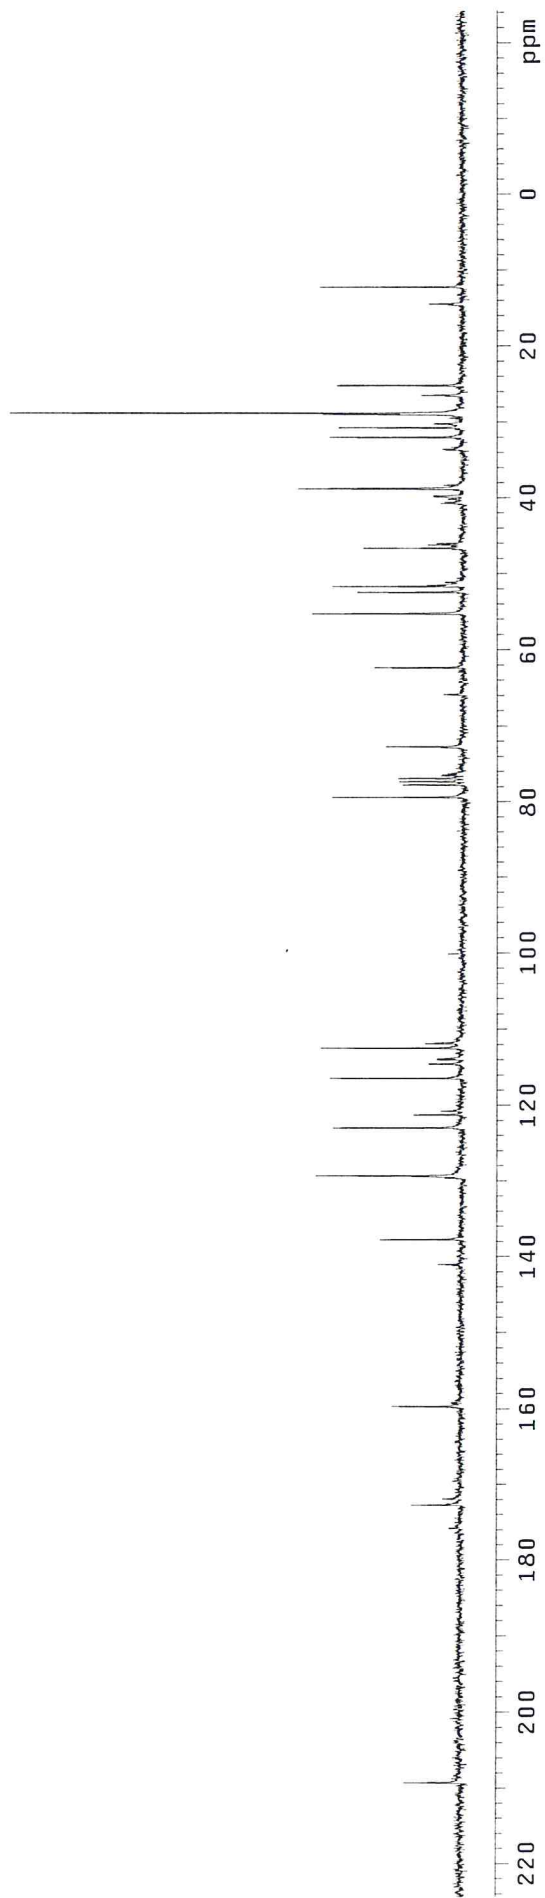

| INDEX | FREQUENCY | PPM   | HEIGHT | INDEX | FREQUENCY | PPM   | HEIGHT |
|-------|-----------|-------|--------|-------|-----------|-------|--------|
| 1     | 2133.339  | 7.110 | 1.5    | 40    | 338.159   | 1.127 | 2.0    |
| 2     | 2125.647  | 7.084 | 2.8    | 41    | 328.544   | 1.095 | 1.0    |
| 3     | 2118.231  | 7.060 | 1.8    | 42    | 308.216   | 1.027 | 50.0   |
| 4     | 1994.889  | 6.649 | 5.2    | 43    | 188.995   | 0.630 | 0.8    |
| 5     | 1986.373  | 6.620 | 7.4    | 44    | 169.766   | 0.566 | 15.6   |
| 6     | 1103.754  | 3.679 | 19.0   | 45    | 0.000     | 0.000 | 2.2    |
| 7     | 1092.492  | 3.641 | 0.8    |       |           |       |        |
| 8     | 1058.428  | 3.528 | 1.4    |       |           |       |        |
| 9     | 1050.462  | 3.501 | 2.5    |       |           |       |        |
| 10    | 1042.221  | 3.474 | 1.4    |       |           |       |        |
| 11    | 959.536   | 3.198 | 1.8    |       |           |       |        |
| 12    | 949.921   | 3.166 | 1.8    |       |           |       |        |
| 13    | 713.402   | 2.378 | 2.5    |       |           |       |        |
| 14    | 700.217   | 2.334 | 4.1    |       |           |       |        |
| 15    | 692.250   | 2.307 | 3.4    |       |           |       |        |
| 16    | 681.262   | 2.271 | 2.8    |       |           |       |        |
| 17    | 672.197   | 2.240 | 0.8    |       |           |       |        |
| 18    | 614.509   | 2.048 | 2.6    |       |           |       |        |
| 19    | 601.598   | 2.005 | 2.1    |       |           |       |        |
| 20    | 581.545   | 1.938 | 1.7    |       |           |       |        |
| 21    | 573.304   | 1.911 | 1.3    |       |           |       |        |
| 22    | 569.183   | 1.897 | 1.3    |       |           |       |        |
| 23    | 564.239   | 1.880 | 1.2    |       |           |       |        |
| 24    | 559.844   | 1.866 | 1.0    |       |           |       |        |
| 25    | 524.956   | 1.750 | 1.9    |       |           |       |        |
| 26    | 519.462   | 1.731 | 2.1    |       |           |       |        |
| 27    | 514.792   | 1.716 | 2.6    |       |           |       |        |
| 28    | 509.573   | 1.698 | 2.7    |       |           |       |        |
| 29    | 497.761   | 1.659 | 0.8    |       |           |       |        |
| 30    | 441.722   | 1.472 | 1.9    |       |           |       |        |
| 31    | 438.425   | 1.461 | 1.8    |       |           |       |        |
| 32    | 432.107   | 1.440 | 2.7    |       |           |       |        |
| 33    | 424.690   | 1.415 | 1.8    |       |           |       |        |
| 34    | 383.485   | 1.278 | 0.8    |       |           |       |        |
| 35    | 371.398   | 1.238 | 1.8    |       |           |       |        |
| 36    | 366.453   | 1.221 | 2.0    |       |           |       |        |
| 37    | 353.817   | 1.179 | 3.1    |       |           |       |        |
| 38    | 347.499   | 1.158 | 1.8    |       |           |       |        |
| 39    | 342.005   | 1.140 | 2.1    |       |           |       |        |

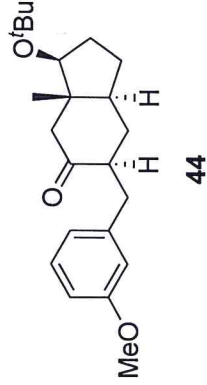

44

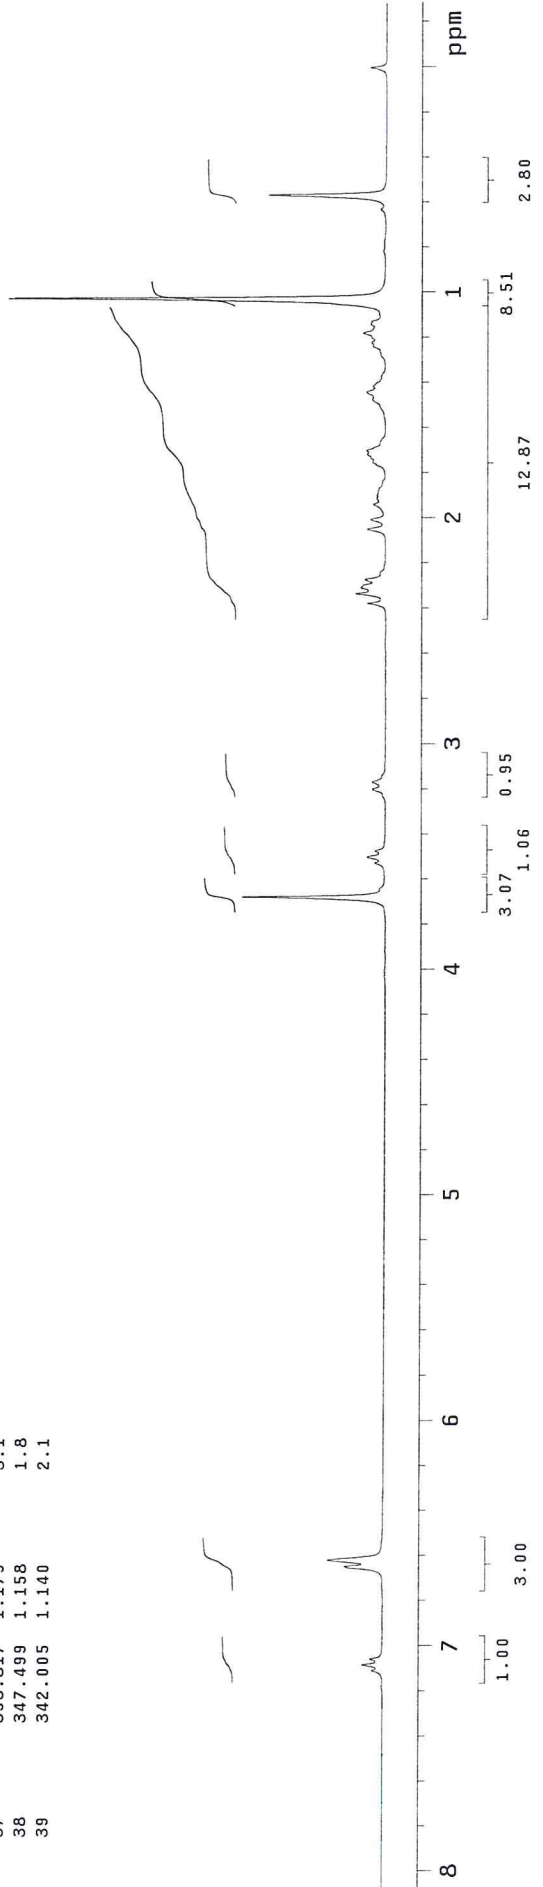

| INDEX | FREQUENCY | PPM     | HEIGHT |
|-------|-----------|---------|--------|
| 1     | 15980.068 | 211.805 | 6.5    |
| 2     | 12042.889 | 159.621 | 8.8    |
| 3     | 10729.350 | 142.210 | 12.7   |
| 4     | 9752.499  | 129.263 | 21.2   |
| 5     | 9170.740  | 121.552 | 21.7   |
| 6     | 8673.726  | 114.964 | 20.4   |
| 7     | 8387.427  | 111.170 | 19.0   |
| 8     | 5975.647  | 79.203  | 18.1   |
| 9     | 5858.837  | 77.655  | 5.3    |
| 10    | 5826.771  | 77.230  | 5.3    |
| 11    | 5794.706  | 76.805  | 5.3    |
| 12    | 5468.325  | 72.479  | 10.8   |
| 13    | 4157.077  | 55.099  | 21.5   |
| 14    | 4048.284  | 53.657  | 20.7   |
| 15    | 3857.036  | 51.122  | 22.3   |
| 16    | 3558.140  | 47.161  | 16.0   |
| 17    | 3279.858  | 43.472  | 21.4   |
| 18    | 2678.631  | 35.503  | 17.1   |
| 19    | 2422.107  | 32.103  | 21.5   |
| 20    | 2349.960  | 31.147  | 19.0   |
| 21    | 2161.003  | 28.643  | 72.3   |
| 22    | 1883.866  | 24.969  | 22.0   |
| 23    | 895.563   | 11.870  | 20.3   |

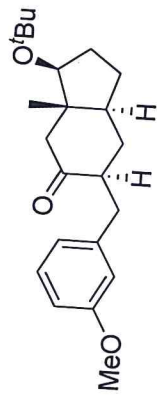

44

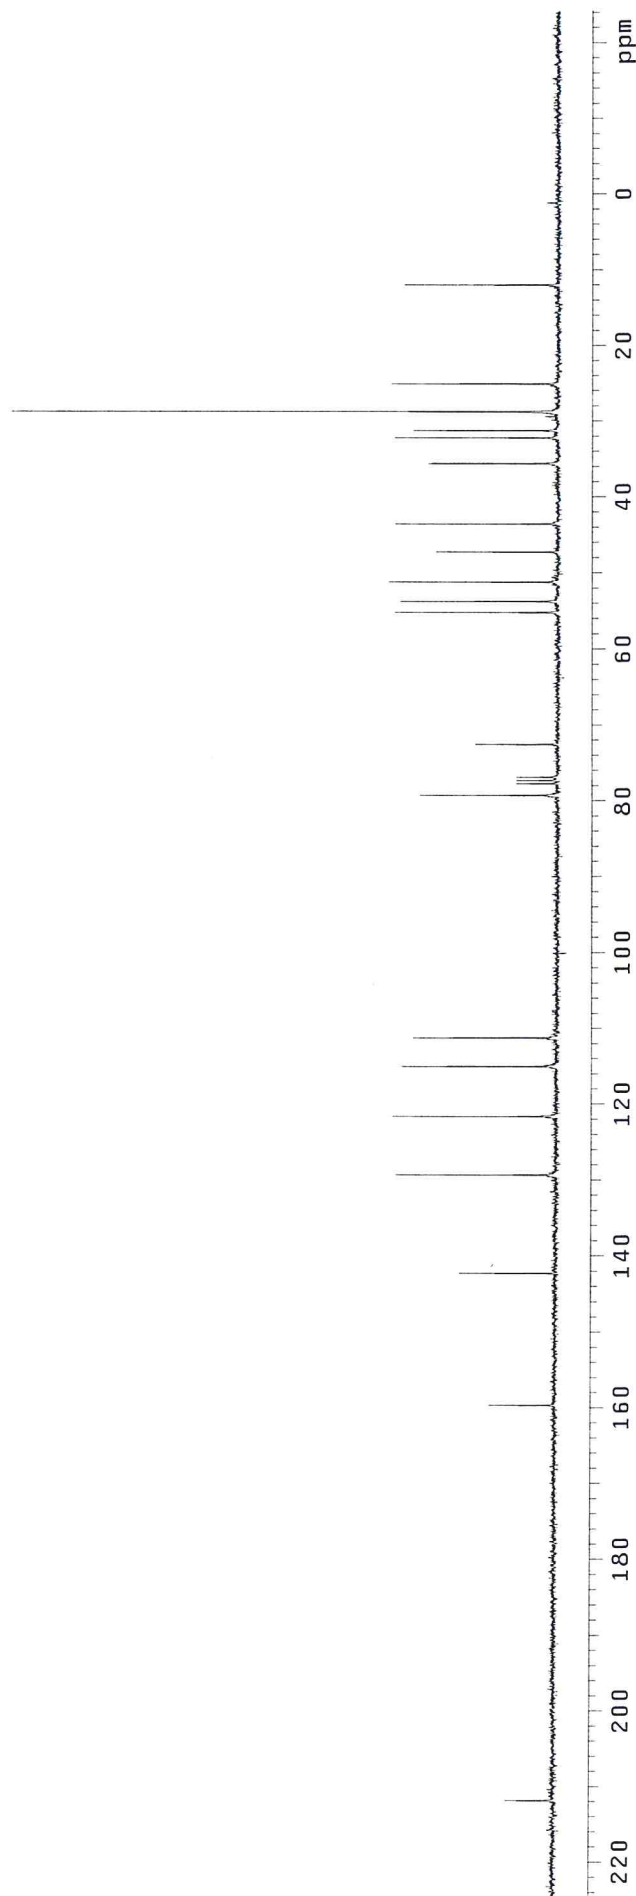

| INDEX | FREQUENCY PPM | HEIGHT | INDEX | FREQUENCY PPM | HEIGHT |
|-------|---------------|--------|-------|---------------|--------|
| 1     | 2195.971      | 0.9    | 40    | 676.317       | 4.6    |
| 2     | 2195.147      | 0.9    | 41    | 663.956       | 5.4    |
| 3     | 2193.499      | 0.8    | 42    | 620.278       | 5.8    |
| 4     | 2178.116      | 1.2    | 43    | 619.179       | 6.3    |
| 5     | 2171.248      | 12.1   | 44    | 551.877       | 1.3    |
| 6     | 2170.424      | 12.1   | 45    | 543.087       | 2.1    |
| 7     | 2165.754      | 4.6    | 46    | 539.241       | 2.1    |
| 8     | 2164.930      | 4.2    | 47    | 529.626       | 6.3    |
| 9     | 2143.503      | 1.2    | 48    | 526.605       | 3.7    |
| 10    | 2142.404      | 1.3    | 49    | 518.913       | 3.8    |
| 11    | 2138.284      | 2.1    | 50    | 488.421       | 1.7    |
| 12    | 2137.460      | 2.1    | 51    | 459.577       | 2.5    |
| 13    | 2129.768      | 4.1    | 52    | 458.478       | 2.6    |
| 14    | 2128.944      | 3.5    | 53    | 456.006       | 2.4    |
| 15    | 2122.626      | 2.5    | 54    | 454.907       | 2.4    |
| 16    | 2121.252      | 2.3    | 55    | 420.844       | 3.5    |
| 17    | 2004.229      | 4.6    | 56    | 417.273       | 4.0    |
| 18    | 1996.537      | 8.1    | 57    | 413.427       | 4.7    |
| 19    | 1989.395      | 11.9   | 58    | 409.307       | 5.0    |
| 20    | 1422.959      | 6.2    | 59    | 402.714       | 6.3    |
| 21    | 1409.498      | 6.1    | 60    | 396.670       | 5.7    |
| 22    | 1108.699      | 38.3   | 61    | 387.605       | 5.1    |
| 23    | 1107.875      | 38.1   | 62    | 375.244       | 4.4    |
| 24    | 1102.930      | 1.6    | 63    | 371.947       | 4.7    |
| 25    | 1102.106      | 1.6    | 64    | 352.993       | 33.7   |
| 26    | 1096.337      | 1.9    | 65    | 330.467       | 4.3    |
| 27    | 1095.239      | 1.9    | 66    | 316.732       | 100.0  |
| 28    | 1089.745      | 0.8    | 67    | 315.908       | 99.2   |
| 29    | 1016.399      | 2.3    | 68    | 295.855       | 2.2    |
| 30    | 1008.158      | 3.9    | 69    | 264.538       | 2.8    |
| 31    | 1000.192      | 2.4    | 70    | 253.001       | 5.4    |
| 32    | 925.198       | 2.3    | 71    | 239.815       | 11.5   |
| 33    | 921.077       | 2.3    | 72    | 232.124       | 11.0   |
| 34    | 912.012       | 2.7    | 73    | 225.805       | 6.0    |
| 35    | 907.892       | 2.5    | 74    | 166.195       | 32.6   |
| 36    | 711.205       | 2.3    | 75    | 0.000         | 2.7    |
| 37    | 701.041       | 3.3    | 76    | -23.899       | 1.2    |
| 38    | 698.019       | 2.3    | 77    | -24.998       | 1.2    |
| 39    | 687.855       | 2.8    |       |               |        |

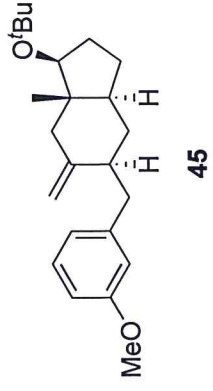

45

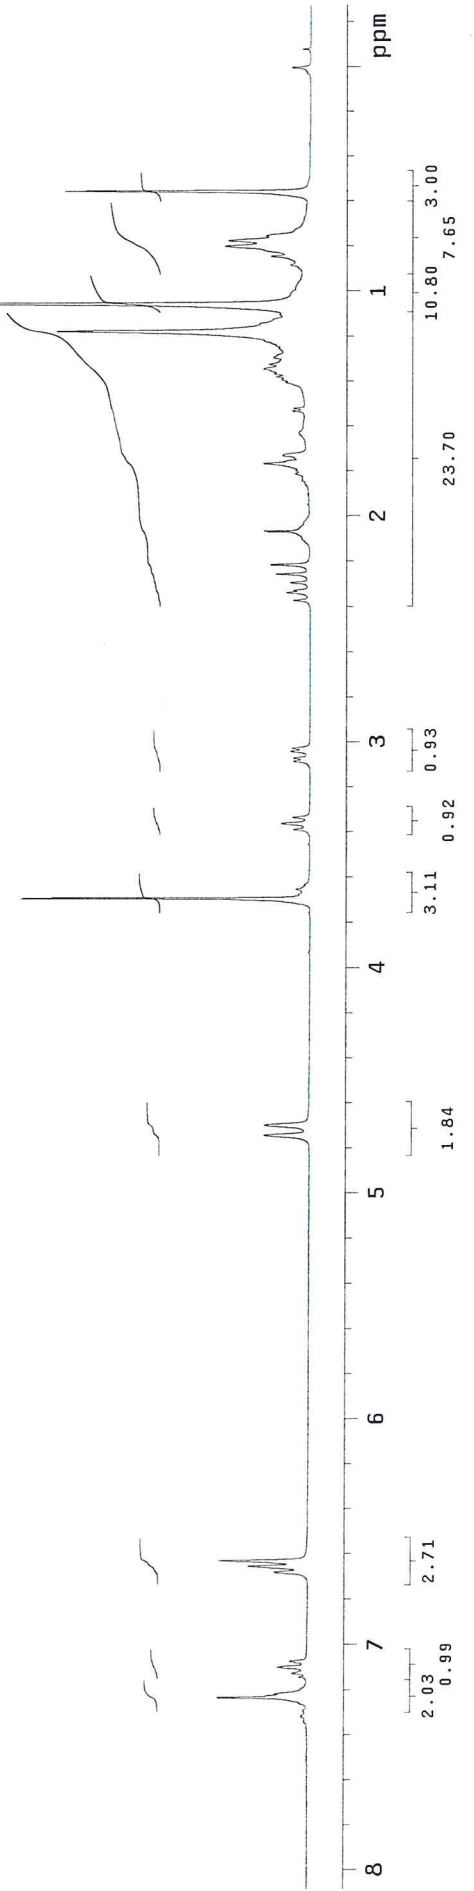

| INDEX | FREQUENCY | PPM     | HEIGHT |
|-------|-----------|---------|--------|
| 1     | 12049.986 | 159.715 | 5.7    |
| 2     | 11346.837 | 150.395 | 8.9    |
| 3     | 10806.305 | 143.230 | 9.0    |
| 4     | 9751.580  | 129.251 | 16.0   |
| 5     | 9721.805  | 128.856 | 5.4    |
| 6     | 9702.337  | 128.598 | 6.0    |
| 7     | 9184.709  | 121.737 | 14.2   |
| 8     | 8683.114  | 115.089 | 14.0   |
| 9     | 8377.347  | 111.036 | 15.6   |
| 10    | 8184.954  | 108.486 | 11.0   |
| 11    | 6033.133  | 79.965  | 13.2   |
| 12    | 5857.918  | 77.643  | 7.9    |
| 13    | 5825.853  | 77.218  | 8.2    |
| 14    | 5794.932  | 76.808  | 7.3    |
| 15    | 5460.536  | 72.376  | 9.0    |
| 16    | 4166.465  | 55.224  | 14.2   |
| 17    | 3675.177  | 48.712  | 13.8   |
| 18    | 3404.911  | 45.130  | 15.0   |
| 19    | 3365.974  | 44.614  | 10.6   |
| 20    | 3327.038  | 44.098  | 19.6   |
| 21    | 2946.833  | 39.058  | 17.4   |
| 22    | 2417.753  | 32.046  | 15.3   |
| 23    | 2400.575  | 31.818  | 15.0   |
| 24    | 2255.135  | 29.890  | 13.2   |
| 25    | 2181.843  | 28.919  | 51.1   |
| 26    | 1931.045  | 25.595  | 15.4   |
| 27    | 841.965   | 11.160  | 15.8   |

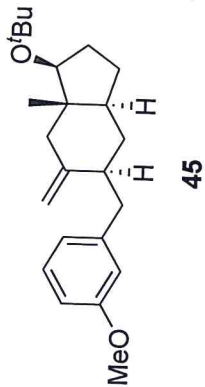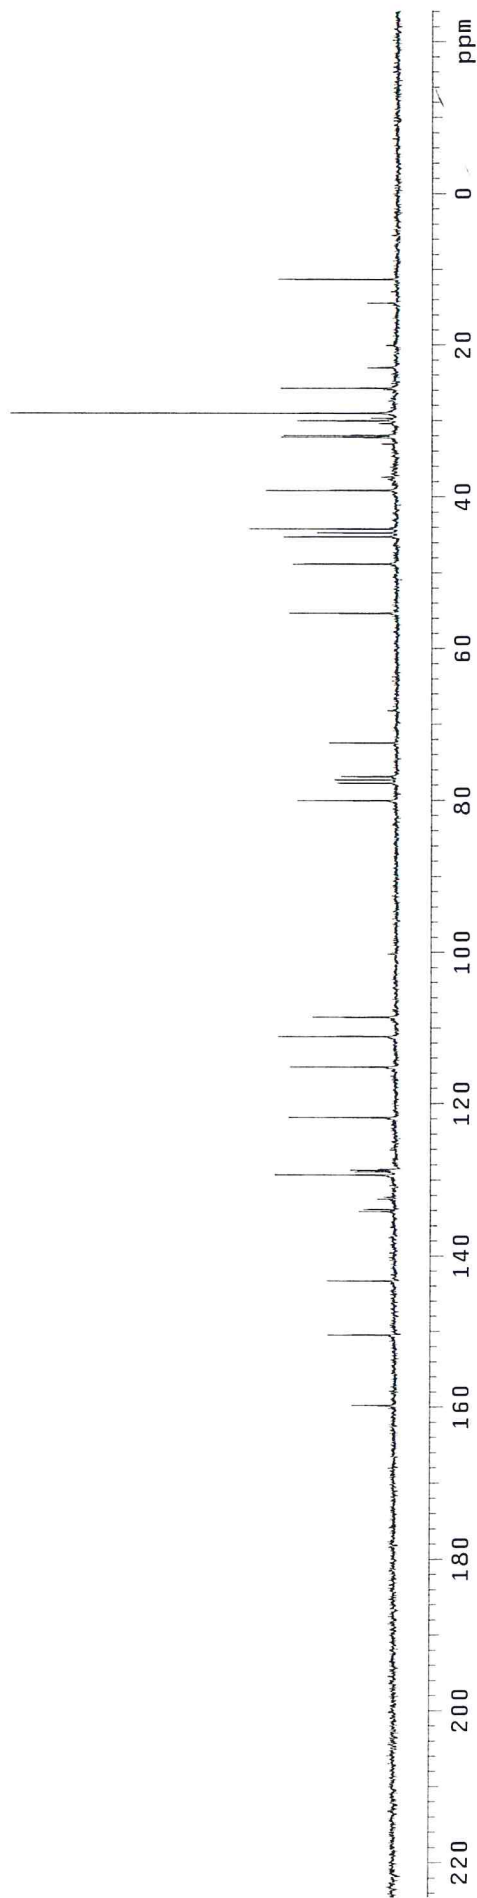

| INDEX | FREQUENCY PPM | HEIGHT | INDEX | FREQUENCY PPM | HEIGHT |
|-------|---------------|--------|-------|---------------|--------|
| 1     | 2140.845      | 7.135  | 40    | 507.190       | 1.690  |
| 2     | 2133.154      | 7.109  | 41    | 398.682       | 1.329  |
| 3     | 2132.055      | 7.106  | 42    | 393.463       | 1.311  |
| 4     | 2129.033      | 7.096  | 43    | 383.848       | 1.279  |
| 5     | 2124.638      | 7.081  | 44    | 380.552       | 1.268  |
| 6     | 2010.087      | 6.699  | 45    | 373.410       | 1.245  |
| 7     | 2001.571      | 6.671  | 46    | 369.839       | 1.233  |
| 8     | 1998.000      | 6.659  | 47    | 360.499       | 1.201  |
| 9     | 1996.077      | 6.653  | 48    | 356.104       | 1.187  |
| 10    | 1992.781      | 6.642  | 49    | 353.357       | 1.178  |
| 11    | 1215.922      | 4.052  | 50    | 349.511       | 1.165  |
| 12    | 1208.780      | 4.029  | 51    | 346.214       | 1.154  |
| 13    | 1145.873      | 3.819  | 52    | 343.193       | 1.144  |
| 14    | 1138.731      | 3.795  | 53    | 337.424       | 1.125  |
| 15    | 1135.160      | 3.783  | 54    | 329.457       | 1.098  |
| 16    | 1128.292      | 3.760  | 55    | 323.414       | 1.078  |
| 17    | 1112.085      | 3.706  | 56    | 316.272       | 1.054  |
| 18    | 1081.318      | 3.604  | 57    | 313.799       | 1.046  |
| 19    | 1074.450      | 3.581  | 58    | 299.240       | 0.997  |
| 20    | 1070.605      | 3.568  | 59    | 265.177       | 0.884  |
| 21    | 1063.737      | 3.545  | 60    | 258.035       | 0.860  |
| 22    | 985.447       | 3.284  | 61    | 250.343       | 0.834  |
| 23    | 978.579       | 3.261  | 62    | 243.476       | 0.811  |
| 24    | 976.931       | 3.256  | 63    | 236.059       | 0.787  |
| 25    | 969.514       | 3.231  | 64    | 210.511       | 0.702  |
| 26    | 828.592       | 2.762  | 65    | 194.304       | 0.648  |
| 27    | 823.098       | 2.743  | 66    | 186.887       | 0.623  |
| 28    | 815.131       | 2.717  |       |               |        |
| 29    | 809.637       | 2.698  |       |               |        |
| 30    | 718.436       | 2.394  |       |               |        |
| 31    | 708.821       | 2.362  |       |               |        |
| 32    | 705.250       | 2.350  |       |               |        |
| 33    | 695.086       | 2.317  |       |               |        |
| 34    | 599.215       | 1.997  |       |               |        |
| 35    | 588.777       | 1.962  |       |               |        |
| 36    | 586.304       | 1.954  |       |               |        |
| 37    | 528.617       | 1.762  |       |               |        |
| 38    | 525.046       | 1.750  |       |               |        |
| 39    | 515.706       | 1.719  |       |               |        |

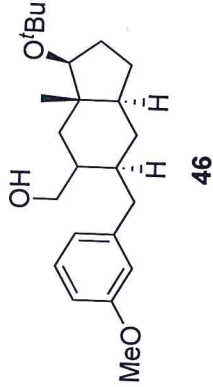

46

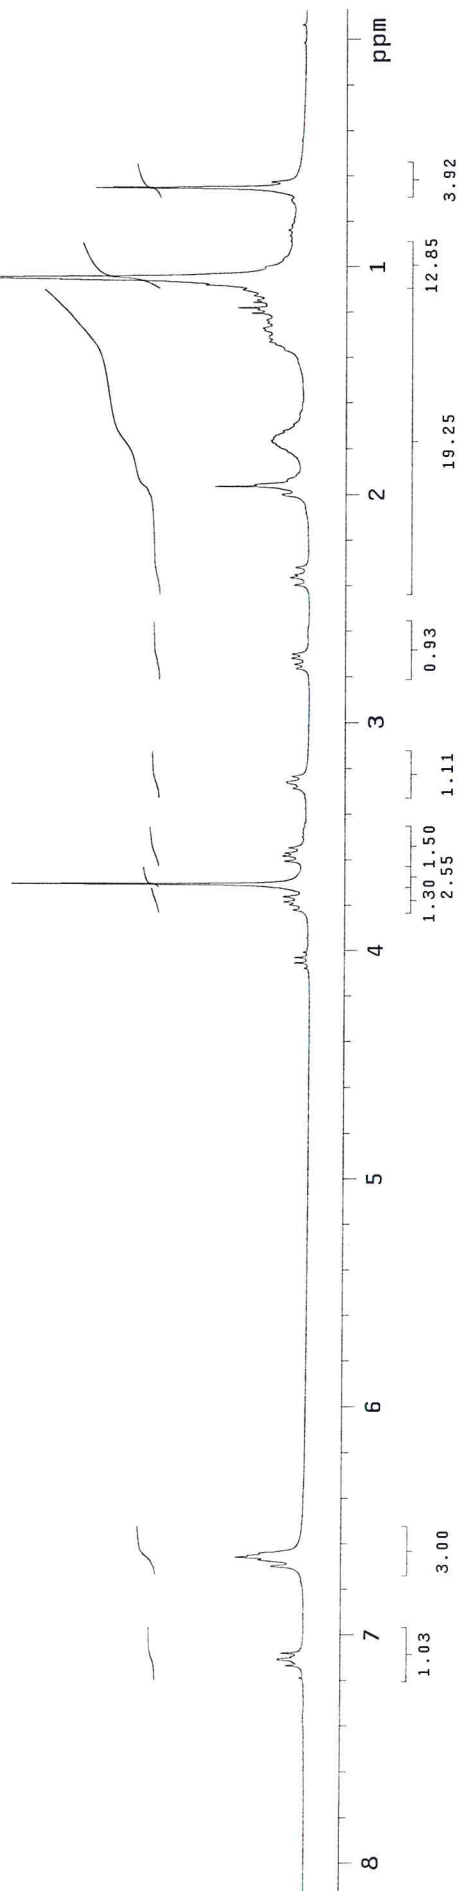



| INDEX | FREQUENCY | PPM     | HEIGHT |
|-------|-----------|---------|--------|
| 1     | 12042.888 | 159.621 | 6.8    |
| 2     | 10814.094 | 143.334 | 8.9    |
| 3     | 9747.918  | 129.202 | 14.6   |
| 4     | 9173.030  | 121.582 | 13.1   |
| 5     | 8671.435  | 114.934 | 15.1   |
| 6     | 8372.539  | 110.972 | 12.8   |
| 7     | 6160.023  | 81.647  | 13.5   |
| 8     | 5857.691  | 77.640  | 5.8    |
| 9     | 5825.626  | 77.215  | 6.0    |
| 10    | 5794.706  | 76.805  | 5.4    |
| 11    | 5451.147  | 72.251  | 10.0   |
| 12    | 4830.452  | 64.024  | 12.3   |
| 13    | 4162.803  | 55.175  | 14.0   |
| 14    | 3489.429  | 46.250  | 16.0   |
| 15    | 3281.003  | 43.488  | 15.8   |
| 16    | 3187.097  | 42.243  | 9.5    |
| 17    | 3118.385  | 41.332  | 13.2   |
| 18    | 3029.060  | 40.148  | 27.7   |
| 19    | 2354.540  | 31.208  | 13.4   |
| 20    | 2175.890  | 28.840  | 50.6   |
| 21    | 2094.581  | 27.762  | 13.3   |
| 22    | 1953.722  | 25.895  | 15.4   |
| 23    | 1005.501  | 13.327  | 16.1   |

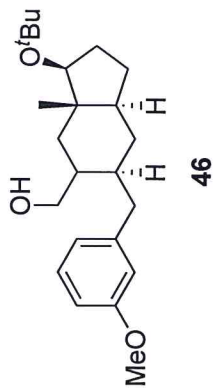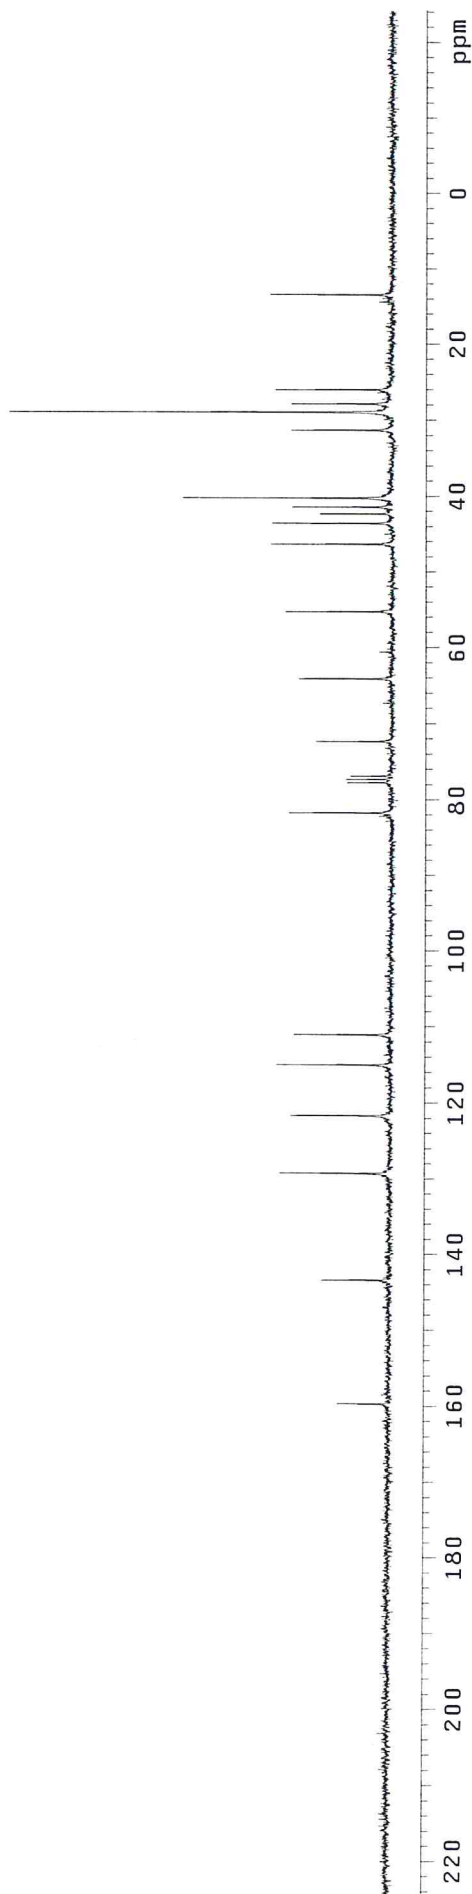

| INDEX | FREQUENCY PPM | HEIGHT | INDEX | FREQUENCY PPM | HEIGHT |
|-------|---------------|--------|-------|---------------|--------|
| 1     | 2941.878      | 9.805  | 40    | 401.155       | 1.337  |
| 2     | 2136.725      | 7.121  | 41    | 394.562       | 1.315  |
| 3     | 2129.308      | 7.097  | 42    | 385.222       | 1.284  |
| 4     | 2121.067      | 7.069  | 43    | 377.530       | 1.258  |
| 5     | 1999.374      | 6.664  | 44    | 373.959       | 1.246  |
| 6     | 1997.451      | 6.657  | 45    | 371.212       | 1.237  |
| 7     | 1991.132      | 6.636  | 46    | 364.345       | 1.214  |
| 8     | 1989.484      | 6.631  | 47    | 359.949       | 1.200  |
| 9     | 1985.364      | 6.617  | 48    | 353.631       | 1.179  |
| 10    | 1108.514      | 3.694  | 49    | 352.807       | 1.176  |
| 11    | 999.182       | 3.330  | 50    | 347.313       | 1.158  |
| 12    | 992.314       | 3.307  | 51    | 345.665       | 1.152  |
| 13    | 983.524       | 3.278  | 52    | 330.282       | 1.101  |
| 14    | 893.971       | 2.979  | 53    | 323.414       | 1.078  |
| 15    | 885.730       | 2.952  | 54    | 311.876       | 1.039  |
| 16    | 880.511       | 2.935  | 55    | 157.768       | 0.526  |
| 17    | 872.544       | 2.908  |       |               |        |
| 18    | 850.843       | 2.836  |       |               |        |
| 19    | 843.151       | 2.810  |       |               |        |
| 20    | 837.382       | 2.791  |       |               |        |
| 21    | 829.691       | 2.765  |       |               |        |
| 22    | 682.450       | 2.274  |       |               |        |
| 23    | 664.320       | 2.214  |       |               |        |
| 24    | 650.859       | 2.169  |       |               |        |
| 25    | 589.326       | 1.964  |       |               |        |
| 26    | 587.952       | 1.960  |       |               |        |
| 27    | 548.395       | 1.828  |       |               |        |
| 28    | 544.824       | 1.816  |       |               |        |
| 29    | 538.781       | 1.796  |       |               |        |
| 30    | 534.660       | 1.782  |       |               |        |
| 31    | 530.540       | 1.768  |       |               |        |
| 32    | 522.573       | 1.742  |       |               |        |
| 33    | 511.585       | 1.705  |       |               |        |
| 34    | 440.437       | 1.468  |       |               |        |
| 35    | 435.767       | 1.452  |       |               |        |
| 36    | 431.921       | 1.440  |       |               |        |
| 37    | 419.835       | 1.399  |       |               |        |
| 38    | 411.319       | 1.371  |       |               |        |
| 39    | 408.022       | 1.360  |       |               |        |

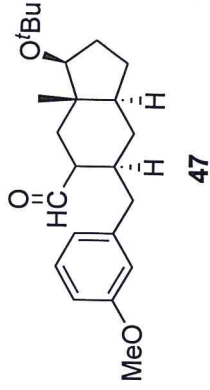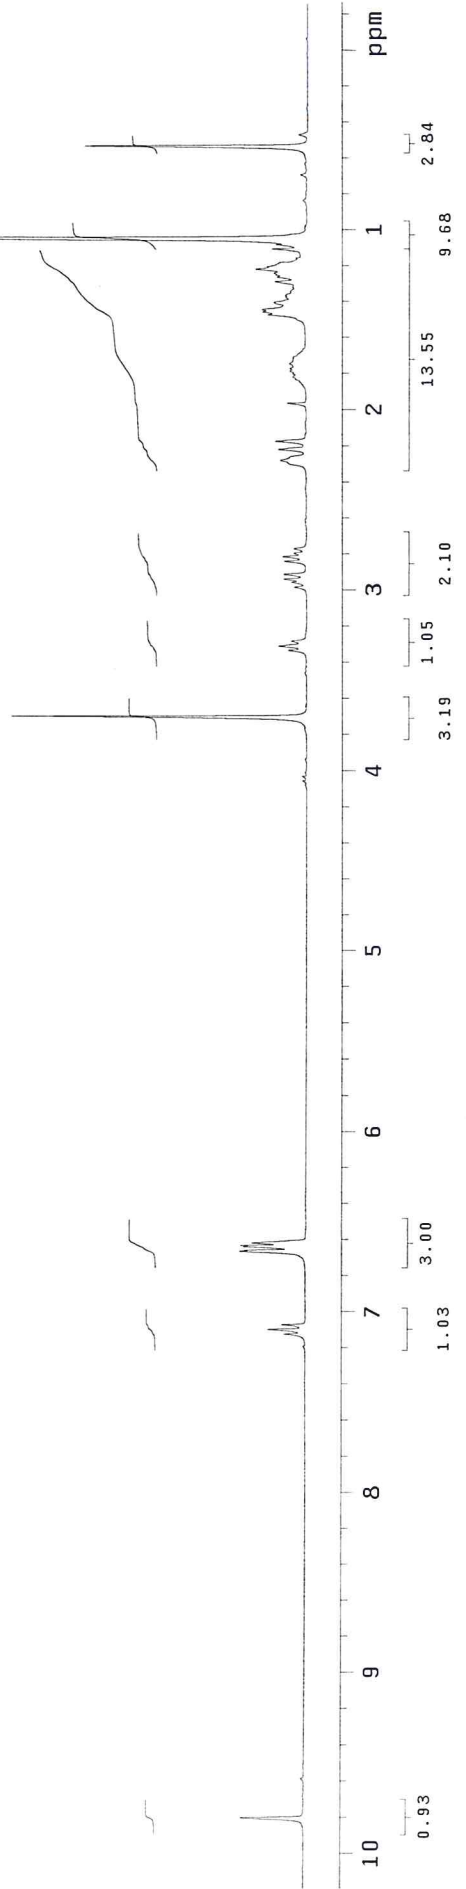

| INDEX | FREQUENCY | PPM     | HEIGHT |
|-------|-----------|---------|--------|
| 1     | 15492.215 | 205.339 | 8.4    |
| 2     | 12050.905 | 159.727 | 4.9    |
| 3     | 10774.012 | 142.802 | 7.8    |
| 4     | 9760.515  | 129.369 | 13.8   |
| 5     | 9161.578  | 121.431 | 14.7   |
| 6     | 8658.838  | 114.767 | 11.4   |
| 7     | 8395.443  | 111.276 | 13.5   |
| 8     | 6095.892  | 80.797  | 13.8   |
| 9     | 5858.836  | 77.655  | 3.1    |
| 10    | 5826.771  | 77.230  | 3.6    |
| 11    | 5794.706  | 76.805  | 3.6    |
| 12    | 5460.309  | 72.373  | 8.4    |
| 13    | 4162.803  | 55.175  | 12.6   |
| 14    | 3720.758  | 49.316  | 14.1   |
| 15    | 3452.782  | 45.764  | 14.2   |
| 16    | 3234.050  | 42.865  | 10.2   |
| 17    | 3222.598  | 42.713  | 15.2   |
| 18    | 2987.833  | 39.602  | 13.6   |
| 19    | 2976.381  | 39.450  | 13.0   |
| 20    | 2355.686  | 31.223  | 13.5   |
| 21    | 2198.794  | 29.144  | 13.4   |
| 22    | 2171.309  | 28.779  | 50.0   |
| 23    | 1951.432  | 25.865  | 13.0   |
| 24    | 990.613   | 13.130  | 16.7   |

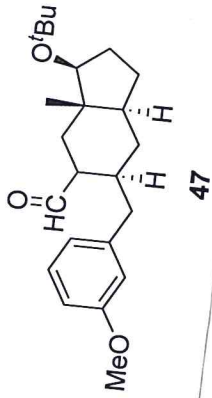

47

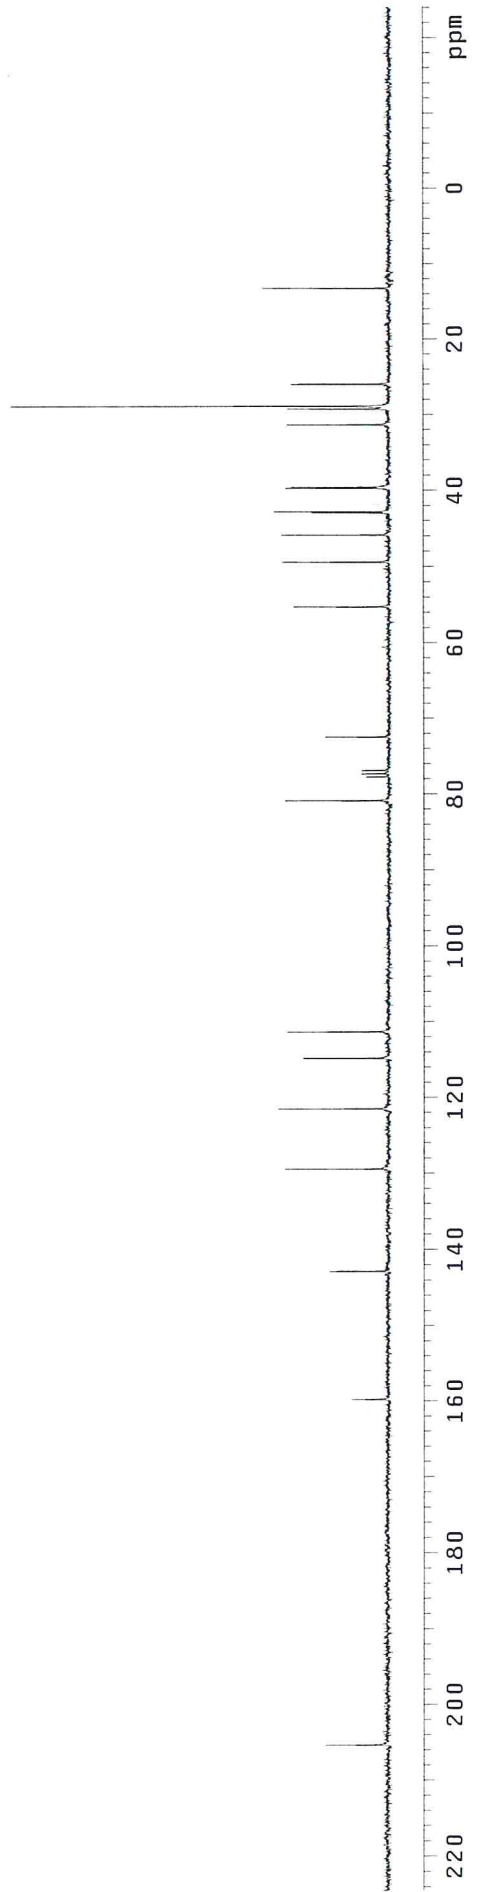

| INDEX | FREQUENCY | PPM   | HEIGHT | INDEX | FREQUENCY | PPM   | HEIGHT |
|-------|-----------|-------|--------|-------|-----------|-------|--------|
| 1     | 2171.248  | 7.236 | 2.0    | 40    | 439.799   | 1.466 | 5.2    |
| 2     | 2066.037  | 6.886 | 7.7    | 41    | 436.502   | 1.455 | 4.6    |
| 3     | 2061.092  | 6.869 | 3.9    | 42    | 434.305   | 1.447 | 4.2    |
| 4     | 2056.972  | 6.855 | 9.5    | 43    | 431.283   | 1.437 | 4.3    |
| 5     | 1995.988  | 6.652 | 11.4   | 44    | 424.141   | 1.414 | 2.8    |
| 6     | 1990.769  | 6.635 | 12.8   | 45    | 416.998   | 1.390 | 3.2    |
| 7     | 1839.133  | 6.129 | 10.0   | 46    | 410.680   | 1.369 | 3.7    |
| 8     | 1135.345  | 3.784 | 5.4    | 47    | 406.285   | 1.354 | 3.9    |
| 9     | 1129.851  | 3.766 | 75.9   | 48    | 400.516   | 1.335 | 3.7    |
| 10    | 1049.913  | 3.499 | 4.4    | 49    | 394.747   | 1.316 | 3.6    |
| 11    | 1041.946  | 3.473 | 7.2    | 50    | 389.528   | 1.298 | 3.6    |
| 12    | 1033.431  | 3.444 | 4.3    | 51    | 382.935   | 1.276 | 2.7    |
| 13    | 851.852   | 2.839 | 3.3    | 52    | 375.793   | 1.252 | 6.1    |
| 14    | 844.985   | 2.816 | 3.9    | 53    | 369.200   | 1.230 | 4.7    |
| 15    | 836.469   | 2.788 | 5.6    | 54    | 348.872   | 1.163 | 200.0  |
| 16    | 829.601   | 2.765 | 5.8    | 55    | 340.906   | 1.136 | 9.0    |
| 17    | 797.461   | 2.658 | 3.9    | 56    | 333.763   | 1.112 | 2.0    |
| 18    | 782.627   | 2.608 | 6.6    | 57    | 215.916   | 0.720 | 55.2   |
| 19    | 767.519   | 2.558 | 3.6    |       |           |       |        |
| 20    | 734.554   | 2.448 | 7.6    |       |           |       |        |
| 21    | 720.544   | 2.401 | 10.6   |       |           |       |        |
| 22    | 712.578   | 2.375 | 2.6    |       |           |       |        |
| 23    | 588.687   | 1.962 | 2.7    |       |           |       |        |
| 24    | 583.468   | 1.945 | 3.7    |       |           |       |        |
| 25    | 575.502   | 1.918 | 10.1   |       |           |       |        |
| 26    | 561.766   | 1.872 | 8.2    |       |           |       |        |
| 27    | 553.800   | 1.846 | 3.1    |       |           |       |        |
| 28    | 496.387   | 1.654 | 2.6    |       |           |       |        |
| 29    | 486.773   | 1.622 | 2.1    |       |           |       |        |
| 30    | 483.202   | 1.610 | 2.3    |       |           |       |        |
| 31    | 479.905   | 1.599 | 3.7    |       |           |       |        |
| 32    | 473.587   | 1.578 | 3.2    |       |           |       |        |
| 33    | 470.016   | 1.566 | 3.7    |       |           |       |        |
| 34    | 462.050   | 1.540 | 4.1    |       |           |       |        |
| 35    | 456.006   | 1.520 | 3.9    |       |           |       |        |
| 36    | 452.984   | 1.510 | 4.4    |       |           |       |        |
| 37    | 449.413   | 1.498 | 3.8    |       |           |       |        |
| 38    | 445.018   | 1.483 | 5.7    |       |           |       |        |
| 39    | 442.820   | 1.476 | 5.6    |       |           |       |        |

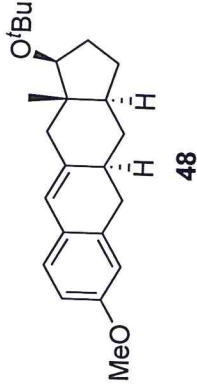

48

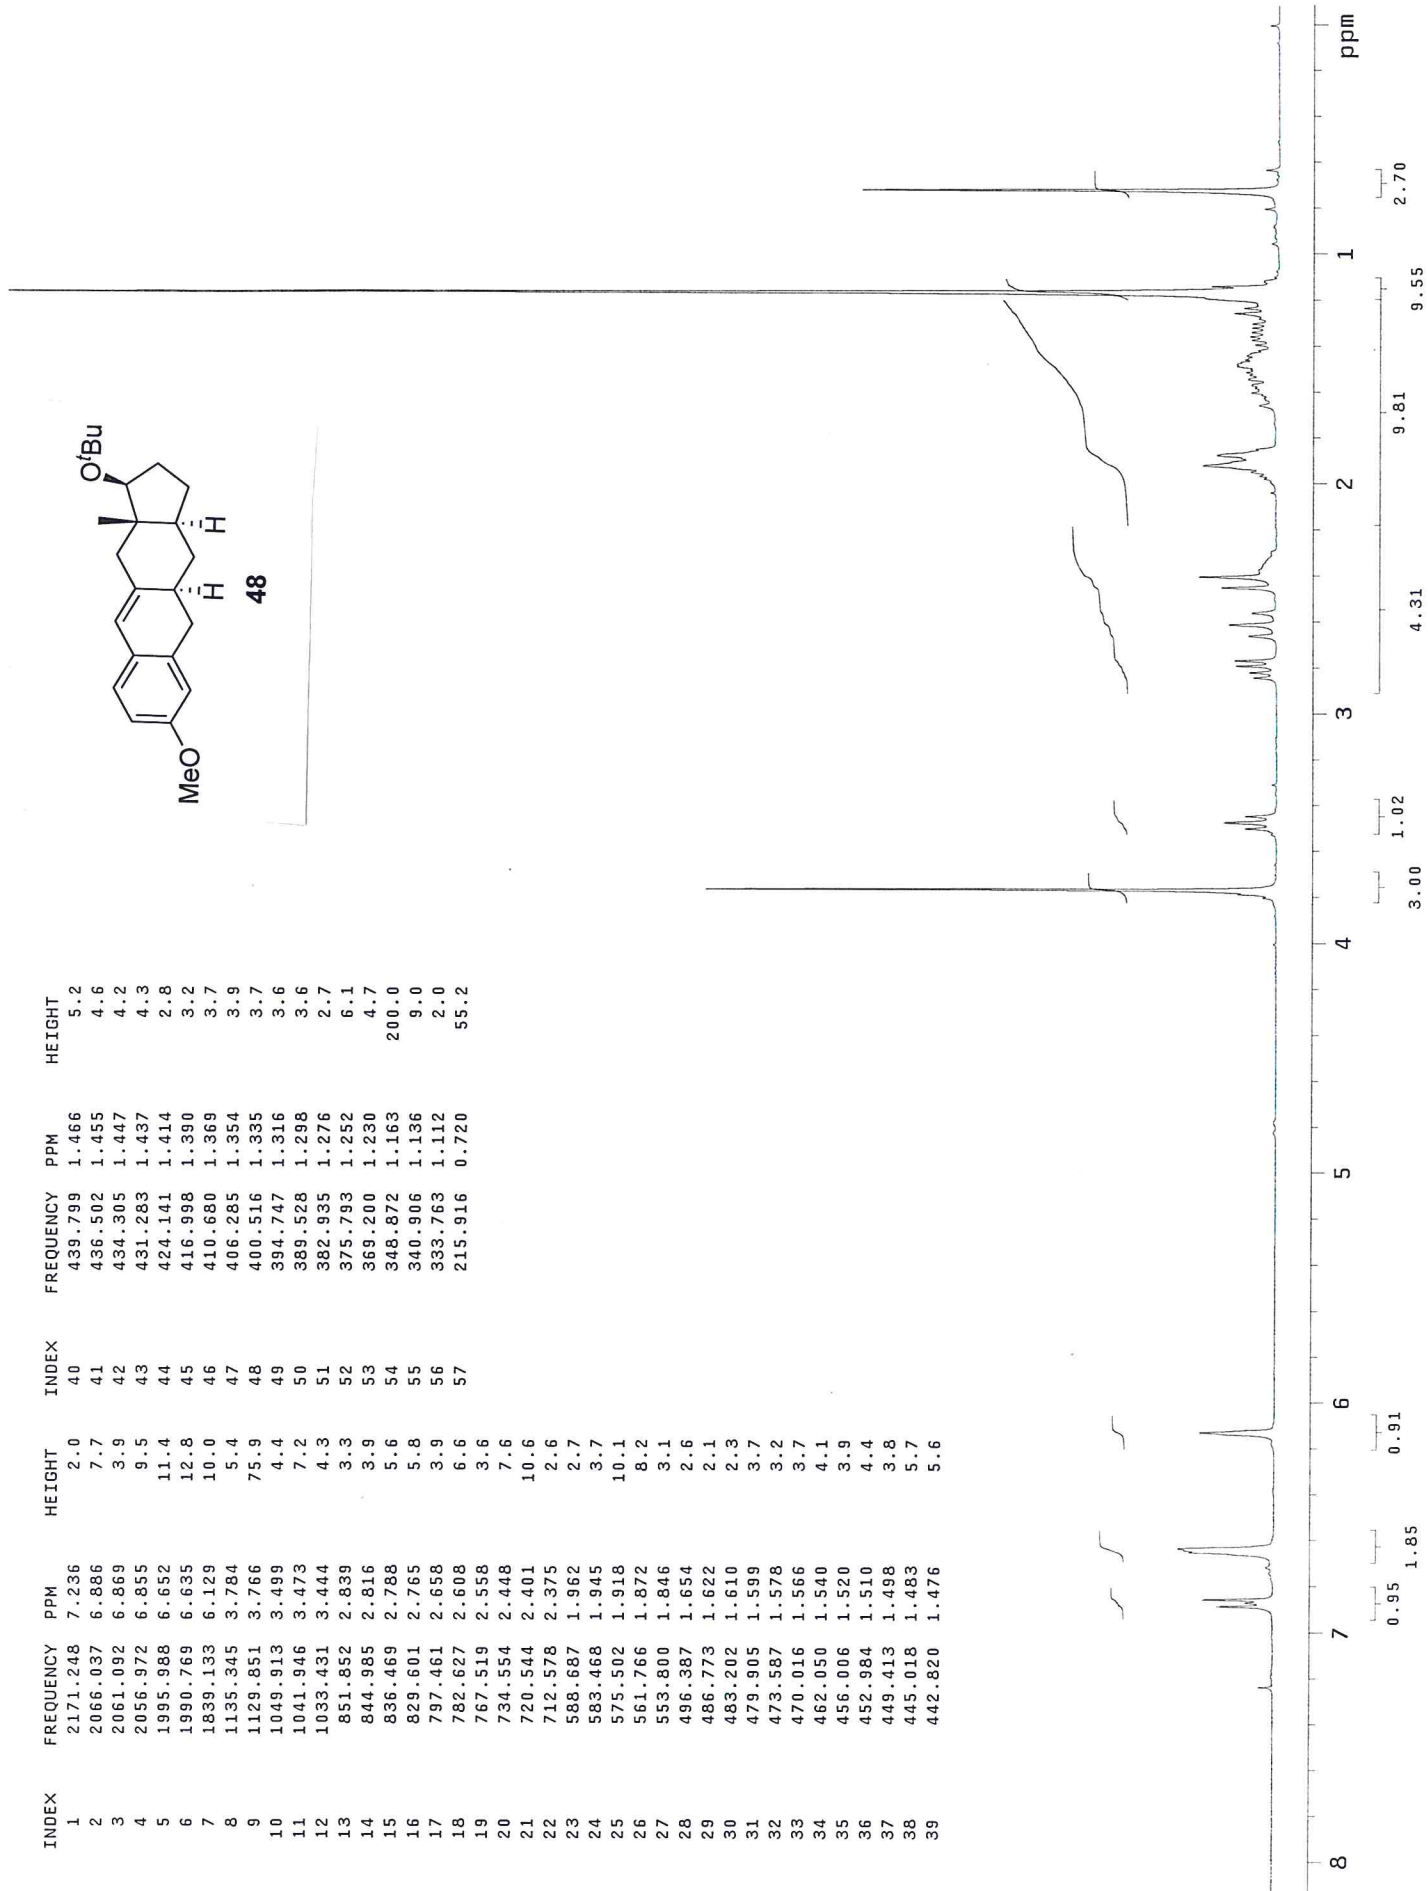

| INDEX | FREQUENCY | PPM     | HEIGHT |
|-------|-----------|---------|--------|
| 1     | 11936.385 | 158.209 | 6.6    |
| 2     | 10534.666 | 139.630 | 9.7    |
| 3     | 10280.433 | 136.260 | 9.4    |
| 4     | 9676.915  | 128.261 | 8.6    |
| 5     | 9509.717  | 126.045 | 19.1   |
| 6     | 9320.760  | 123.541 | 18.1   |
| 7     | 8555.770  | 113.401 | 18.3   |
| 8     | 8386.281  | 111.155 | 15.1   |
| 9     | 6038.632  | 80.038  | 17.9   |
| 10    | 5857.691  | 77.640  | 11.0   |
| 11    | 5825.625  | 77.215  | 11.1   |
| 12    | 5793.560  | 76.790  | 10.0   |
| 13    | 5466.034  | 72.449  | 9.3    |
| 14    | 4181.126  | 55.418  | 17.7   |
| 15    | 3499.735  | 46.387  | 14.7   |
| 16    | 3307.342  | 43.837  | 18.5   |
| 17    | 3287.874  | 43.579  | 11.2   |
| 18    | 2796.585  | 37.067  | 16.4   |
| 19    | 2725.583  | 36.126  | 18.1   |
| 20    | 2601.902  | 34.486  | 17.1   |
| 21    | 2377.444  | 31.511  | 16.1   |
| 22    | 2183.906  | 28.946  | 51.5   |
| 23    | 1943.415  | 25.759  | 19.6   |
| 24    | 869.222   | 11.521  | 19.9   |

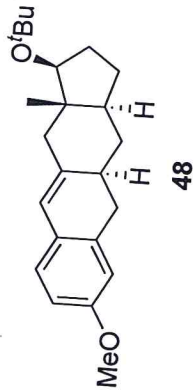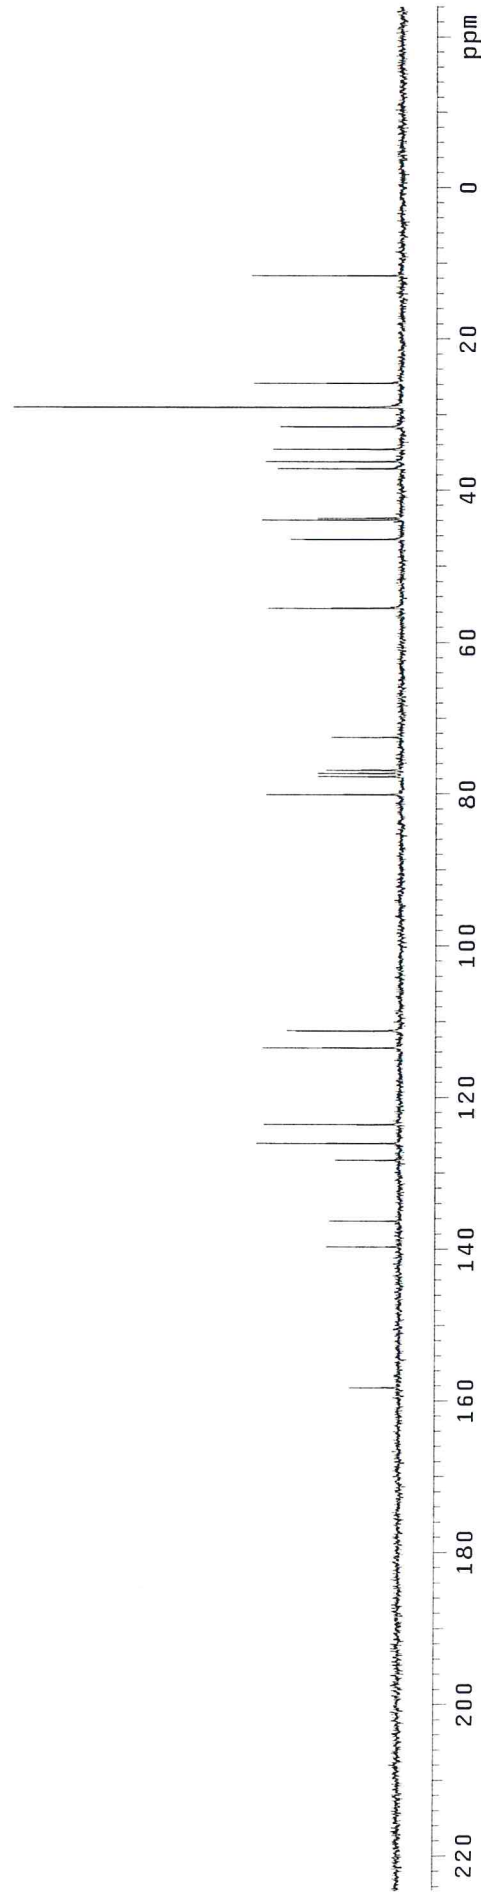

B-4

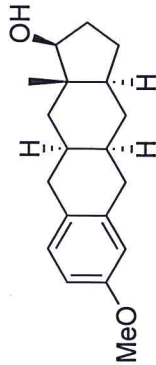

| INDEX | FREQUENCY PPM | HEIGHT | INDEX | FREQUENCY PPM | HEIGHT |
|-------|---------------|--------|-------|---------------|--------|
| 1     | 2075.191      | 6.916  | 40    | 412.418       | 1.375  |
| 2     | 2067.225      | 6.890  | 41    | 404.726       | 1.349  |
| 3     | 1992.231      | 6.640  | 42    | 401.429       | 1.338  |
| 4     | 1989.759      | 6.631  | 43    | 394.287       | 1.314  |
| 5     | 1979.595      | 6.598  | 44    | 390.441       | 1.301  |
| 6     | 1115.930      | 3.719  | 45    | 384.947       | 1.283  |
| 7     | 1088.735      | 3.629  | 46    | 376.706       | 1.255  |
| 8     | 1079.944      | 3.599  | 47    | 372.586       | 1.242  |
| 9     | 1072.253      | 3.574  | 48    | 371.762       | 1.239  |
| 10    | 895.619       | 2.985  | 49    | 365.443       | 1.218  |
| 11    | 889.026       | 2.963  | 50    | 358.301       | 1.194  |
| 12    | 879.412       | 2.931  | 51    | 357.477       | 1.191  |
| 13    | 872.819       | 2.909  | 52    | 354.730       | 1.182  |
| 14    | 818.428       | 2.728  | 53    | 343.193       | 1.144  |
| 15    | 808.264       | 2.694  | 54    | 331.380       | 1.104  |
| 16    | 792.606       | 2.642  | 55    | 227.818       | 0.759  |
| 17    | 785.189       | 2.617  |       |               |        |
| 18    | 745.357       | 2.484  |       |               |        |
| 19    | 742.335       | 2.474  |       |               |        |
| 20    | 729.149       | 2.430  |       |               |        |
| 21    | 726.128       | 2.420  |       |               |        |
| 22    | 643.717       | 2.145  |       |               |        |
| 23    | 635.476       | 2.118  |       |               |        |
| 24    | 625.037       | 2.083  |       |               |        |
| 25    | 600.863       | 2.003  |       |               |        |
| 26    | 595.919       | 1.986  |       |               |        |
| 27    | 592.897       | 1.976  |       |               |        |
| 28    | 587.128       | 1.957  |       |               |        |
| 29    | 584.107       | 1.947  |       |               |        |
| 30    | 582.184       | 1.940  |       |               |        |
| 31    | 581.360       | 1.938  |       |               |        |
| 32    | 573.668       | 1.912  |       |               |        |
| 33    | 566.526       | 1.888  |       |               |        |
| 34    | 561.032       | 1.870  |       |               |        |
| 35    | 438.789       | 1.462  |       |               |        |
| 36    | 432.196       | 1.440  |       |               |        |
| 37    | 425.329       | 1.418  |       |               |        |
| 38    | 418.736       | 1.396  |       |               |        |
| 39    | 415.165       | 1.384  |       |               |        |

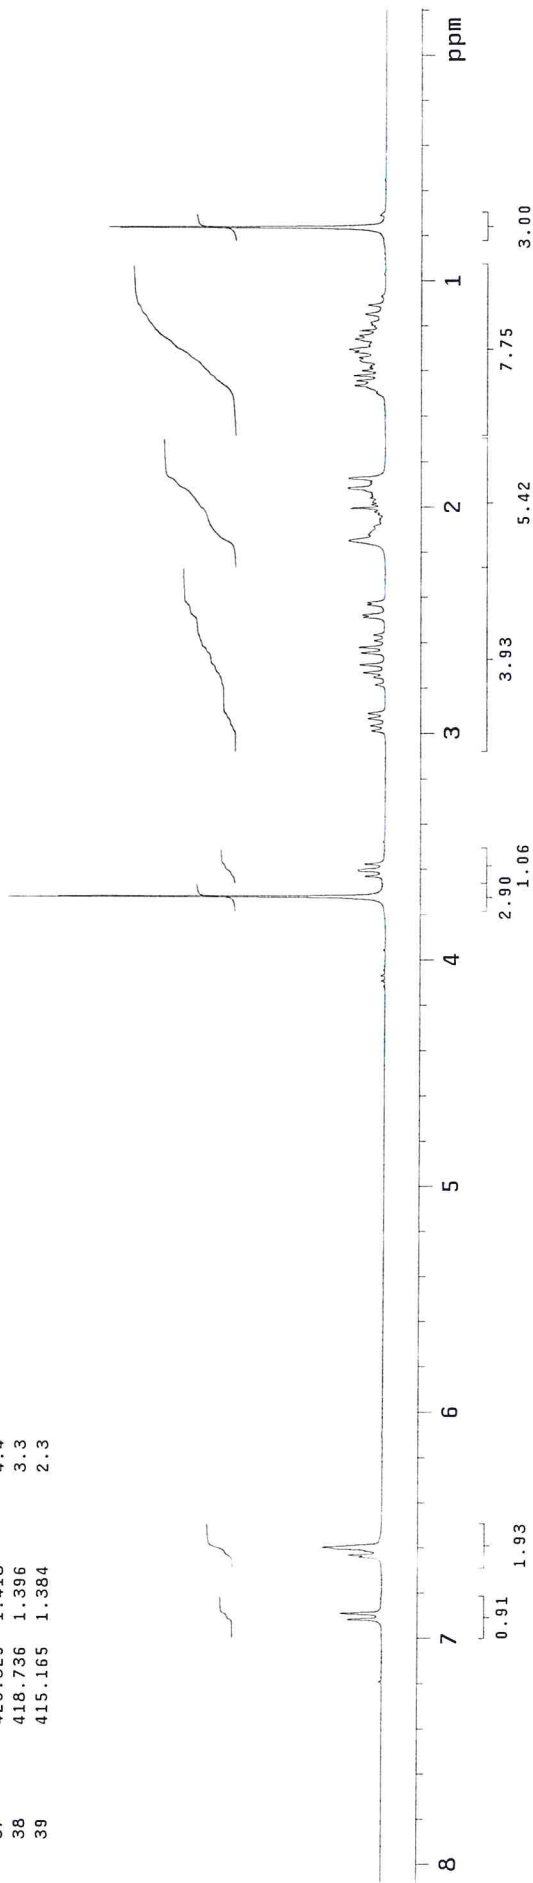

| INDEX | FREQUENCY | PPM     | HEIGHT |
|-------|-----------|---------|--------|
| 1     | 11887.142 | 157.556 | 10.8   |
| 2     | 10385.792 | 137.657 | 18.8   |
| 3     | 9844.115  | 130.477 | 15.1   |
| 4     | 9710.127  | 128.701 | 31.1   |
| 5     | 8577.529  | 113.689 | 28.8   |
| 6     | 8395.443  | 111.276 | 30.3   |
| 7     | 6265.381  | 83.043  | 35.4   |
| 8     | 5858.837  | 77.855  | 5.9    |
| 9     | 5826.772  | 77.230  | 6.8    |
| 10    | 5794.706  | 76.805  | 6.8    |
| 11    | 4167.384  | 55.236  | 27.0   |
| 12    | 3455.073  | 45.795  | 32.4   |
| 13    | 3237.486  | 42.911  | 34.0   |
| 14    | 3208.856  | 42.531  | 25.3   |
| 15    | 2754.214  | 36.505  | 32.8   |
| 16    | 2704.971  | 35.853  | 36.2   |
| 17    | 2507.997  | 33.242  | 29.5   |
| 18    | 2482.803  | 32.908  | 28.6   |
| 19    | 2282.394  | 30.252  | 30.0   |
| 20    | 2254.909  | 29.887  | 34.0   |
| 21    | 1930.819  | 25.592  | 36.7   |
| 22    | 1039.857  | 13.783  | 28.0   |

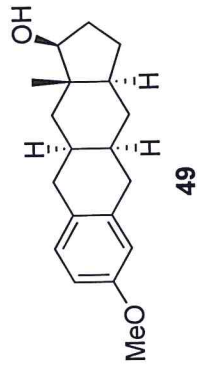

49

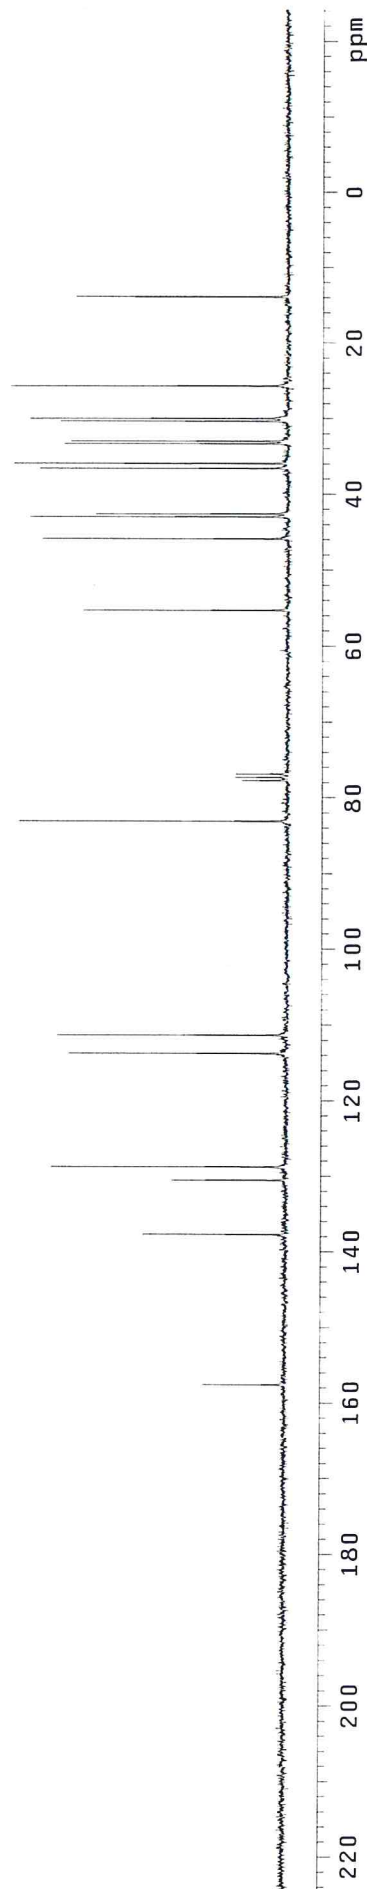

| INDEX | FREQUENCY | PPM   | HEIGHT |
|-------|-----------|-------|--------|
| 1     | 1739.074  | 5.796 | 18.5   |
| 2     | 1097.644  | 3.658 | 11.0   |
| 3     | 991.334   | 3.304 | 13.5   |
| 4     | 761.957   | 2.539 | 8.7    |
| 5     | 726.521   | 2.421 | 8.2    |
| 6     | 710.588   | 2.368 | 19.0   |
| 7     | 693.557   | 2.311 | 30.7   |
| 8     | 691.359   | 2.304 | 32.5   |
| 9     | 619.112   | 2.063 | 23.6   |
| 10    | 614.717   | 2.049 | 25.2   |
| 11    | 607.300   | 2.024 | 25.7   |
| 12    | 602.905   | 2.009 | 23.1   |
| 13    | 481.212   | 1.604 | 19.3   |
| 14    | 471.872   | 1.573 | 19.6   |
| 15    | 466.927   | 1.556 | 19.5   |
| 16    | 454.565   | 1.515 | 15.3   |
| 17    | 439.182   | 1.464 | 13.7   |
| 18    | 432.864   | 1.443 | 13.6   |
| 19    | 422.425   | 1.408 | 15.4   |
| 20    | 366.935   | 1.223 | 3.4    |
| 21    | 343.311   | 1.144 | 3.0    |
| 22    | 292.216   | 0.974 | 11.6   |
| 23    | 280.129   | 0.934 | 17.2   |
| 24    | 261.450   | 0.871 | 70.7   |
| 25    | 203.762   | 0.679 | 4.3    |

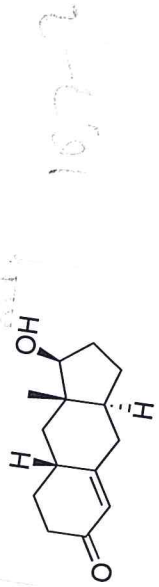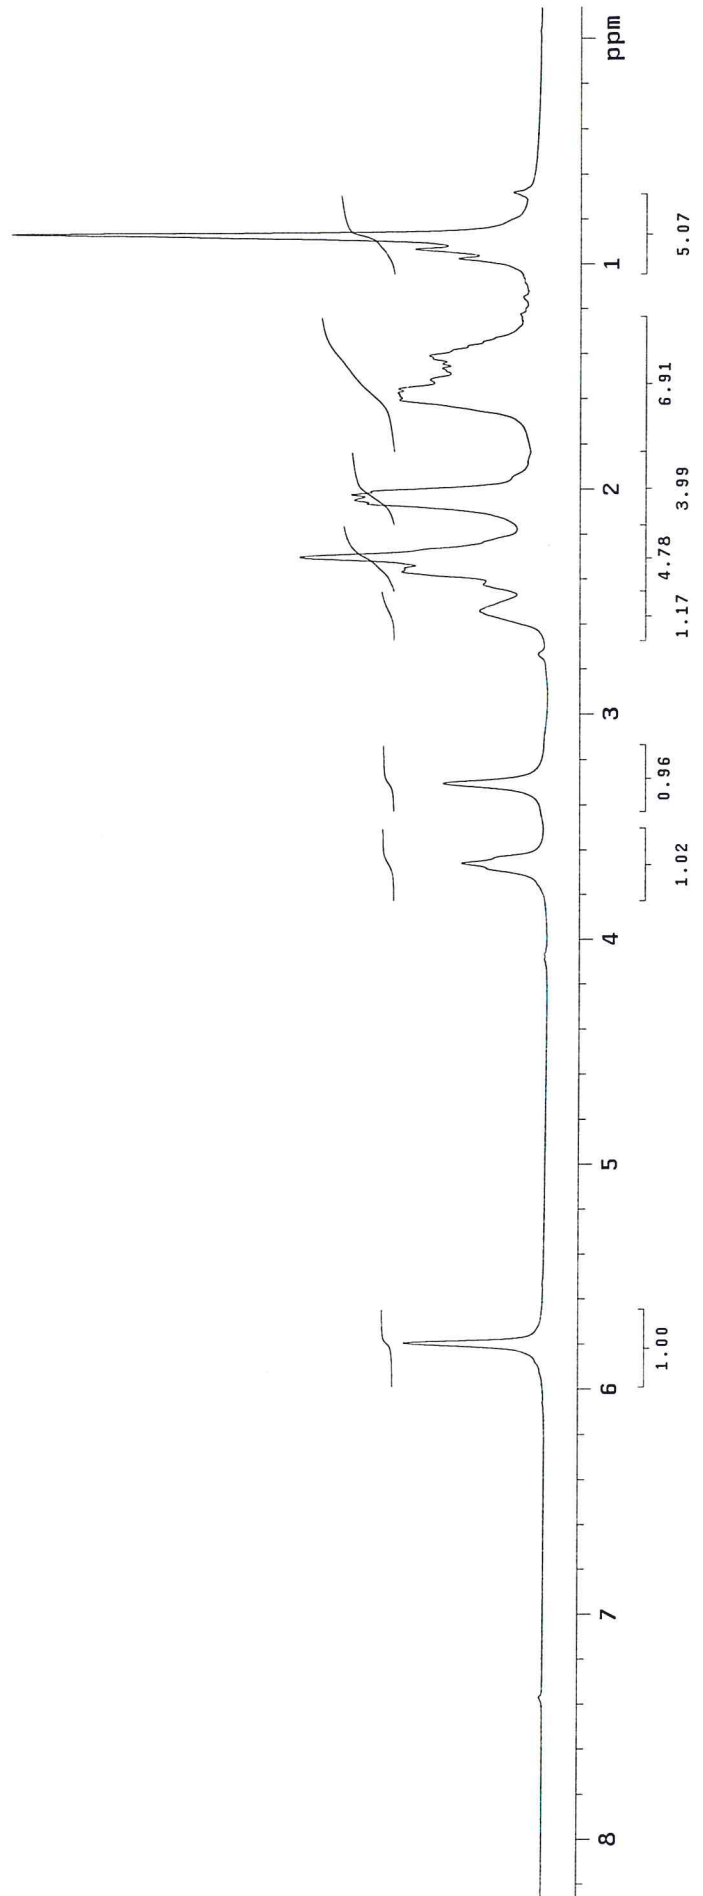



MA 6377-2

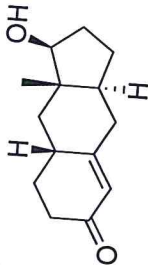

50

| INDEX | FREQUENCY | PPM     | HEIGHT |
|-------|-----------|---------|--------|
| 1     | 15108.576 | 200.254 | 3.3    |
| 2     | 12588.002 | 166.846 | 4.3    |
| 3     | 9462.765  | 125.423 | 20.0   |
| 4     | 6060.392  | 80.326  | 18.4   |
| 5     | 5858.837  | 77.655  | 2.4    |
| 6     | 5825.627  | 77.215  | 2.5    |
| 7     | 5793.561  | 76.790  | 2.7    |
| 8     | 3343.990  | 44.322  | 18.0   |
| 9     | 3331.393  | 44.155  | 18.3   |
| 10    | 3256.955  | 43.169  | 11.3   |
| 11    | 2804.603  | 37.173  | 20.4   |
| 12    | 2691.229  | 35.670  | 21.2   |
| 13    | 2576.709  | 34.153  | 22.4   |
| 14    | 2275.523  | 30.161  | 21.6   |
| 15    | 2269.797  | 30.085  | 24.7   |
| 16    | 1890.737  | 25.060  | 20.4   |
| 17    | 781.044   | 10.352  | 17.8   |

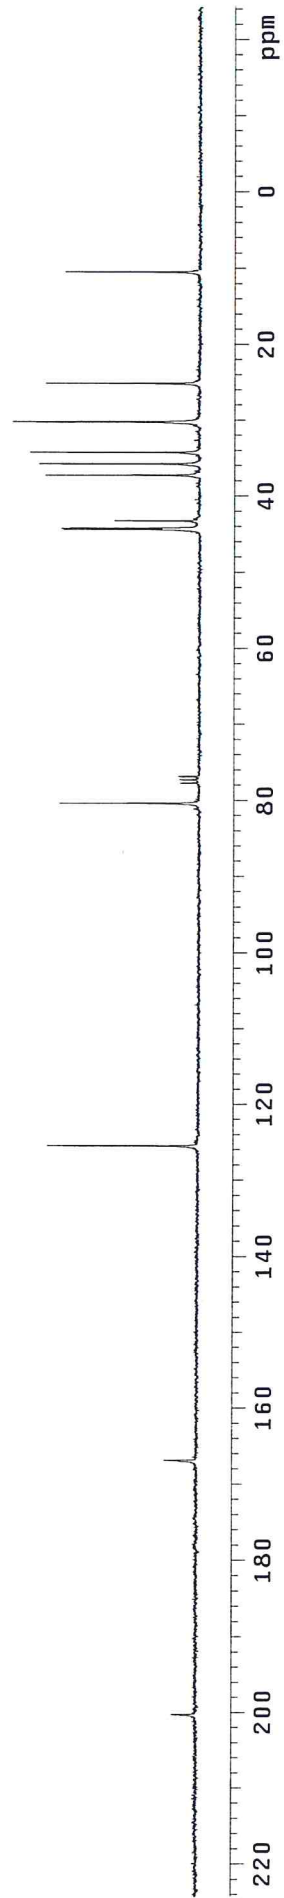

1039

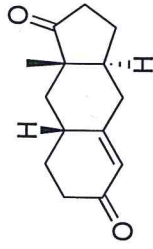

51

| INDEX | FREQUENCY PPM | HEIGHT | INDEX | FREQUENCY PPM | HEIGHT |
|-------|---------------|--------|-------|---------------|--------|
| 1     | 1737.701      | 5.791  | 40    | 511.704       | 1.705  |
| 2     | 760.035       | 2.533  | 41    | 509.231       | 1.697  |
| 3     | 755.365       | 2.517  | 42    | 500.716       | 1.669  |
| 4     | 744.377       | 2.481  | 43    | 498.793       | 1.662  |
| 5     | 740.256       | 2.467  | 44    | 494.123       | 1.647  |
| 6     | 735.312       | 2.451  | 45    | 492.200       | 1.640  |
| 7     | 729.817       | 2.432  | 46    | 489.178       | 1.630  |
| 8     | 725.148       | 2.417  | 47    | 485.332       | 1.618  |
| 9     | 716.357       | 2.387  | 48    | 480.388       | 1.601  |
| 10    | 708.665       | 2.362  | 49    | 477.366       | 1.591  |
| 11    | 704.820       | 2.349  | 50    | 474.619       | 1.582  |
| 12    | 700.699       | 2.335  | 51    | 469.949       | 1.566  |
| 13    | 694.381       | 2.314  | 52    | 337.542       | 1.125  |
| 14    | 689.436       | 2.298  | 53    | 324.906       | 1.083  |
| 15    | 680.371       | 2.268  | 54    | 312.270       | 1.041  |
| 16    | 677.899       | 2.259  | 55    | 286.173       | 0.954  |
| 17    | 675.426       | 2.251  |       |               |        |
| 18    | 673.229       | 2.244  |       |               |        |
| 19    | 663.889       | 2.213  |       |               |        |
| 20    | 658.944       | 2.196  |       |               |        |
| 21    | 648.506       | 2.161  |       |               |        |
| 22    | 639.440       | 2.131  |       |               |        |
| 23    | 630.650       | 2.102  |       |               |        |
| 24    | 622.684       | 2.075  |       |               |        |
| 25    | 619.936       | 2.066  |       |               |        |
| 26    | 614.992       | 2.050  |       |               |        |
| 27    | 610.871       | 2.036  |       |               |        |
| 28    | 605.103       | 2.017  |       |               |        |
| 29    | 599.334       | 1.997  |       |               |        |
| 30    | 592.741       | 1.975  |       |               |        |
| 31    | 586.148       | 1.954  |       |               |        |
| 32    | 580.105       | 1.933  |       |               |        |
| 33    | 571.864       | 1.906  |       |               |        |
| 34    | 566.095       | 1.887  |       |               |        |
| 35    | 535.878       | 1.786  |       |               |        |
| 36    | 529.010       | 1.763  |       |               |        |
| 37    | 523.516       | 1.745  |       |               |        |
| 38    | 518.297       | 1.727  |       |               |        |
| 39    | 516.923       | 1.723  |       |               |        |

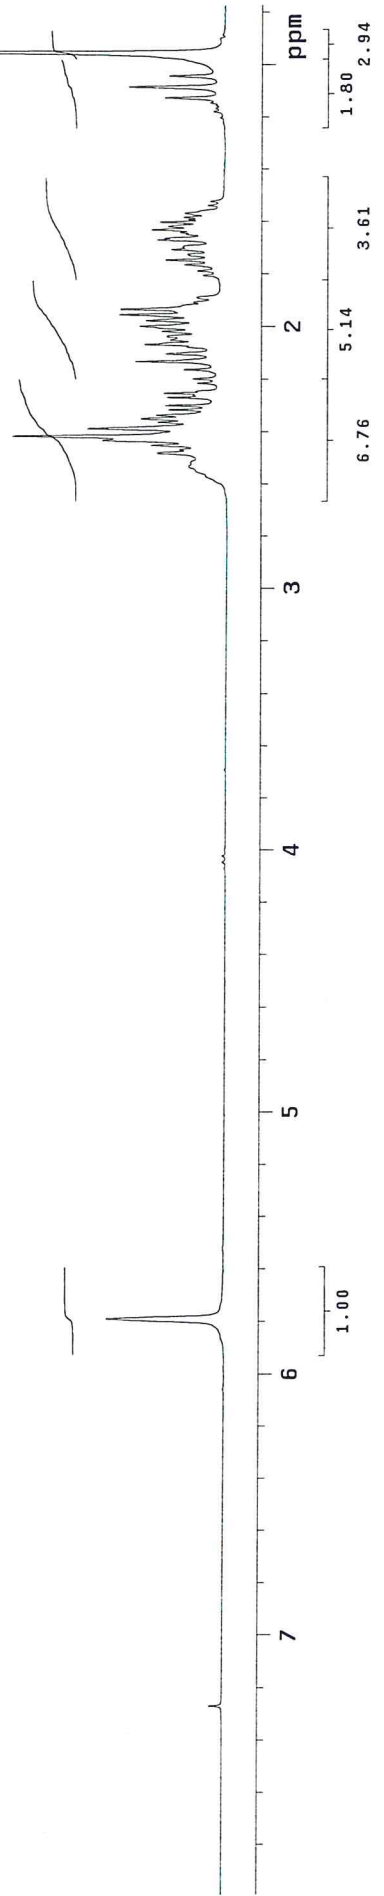

1039

| INDEX | FREQUENCY | PPM     | HEIGHT |
|-------|-----------|---------|--------|
| 1     | 16491.970 | 218.590 | 3.2    |
| 2     | 15046.734 | 199.435 | 4.1    |
| 3     | 12377.285 | 164.053 | 6.2    |
| 4     | 9542.928  | 126.485 | 22.3   |
| 5     | 5856.546  | 77.625  | 7.9    |
| 6     | 5824.481  | 77.200  | 8.3    |
| 7     | 5792.415  | 76.775  | 8.0    |
| 8     | 3599.367  | 47.707  | 8.1    |
| 9     | 3373.764  | 44.717  | 19.9   |
| 10    | 2934.009  | 38.888  | 23.5   |
| 11    | 2813.764  | 37.295  | 24.5   |
| 12    | 2694.664  | 35.716  | 29.7   |
| 13    | 2654.582  | 35.185  | 24.4   |
| 14    | 2559.531  | 33.925  | 25.3   |
| 15    | 2275.522  | 30.161  | 26.7   |
| 16    | 1794.540  | 23.785  | 28.1   |
| 17    | 971.145   | 12.872  | 26.3   |

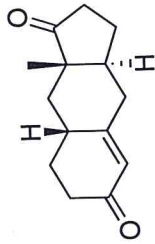

51

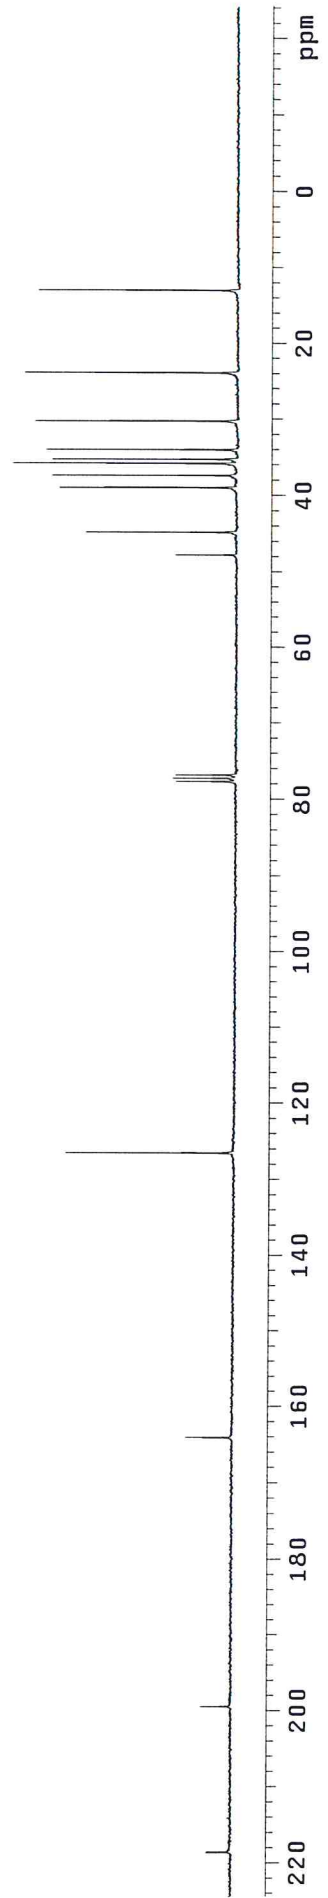

| INDEX | FREQUENCY PPM | HEIGHT |
|-------|---------------|--------|-------|---------------|--------|-------|---------------|--------|-------|---------------|--------|
| 1     | 1758.370      | 5.860  | 40    | 587.863       | 1.959  | 79    | 384.583       | 1.282  | 79    | 384.583       | 22.7   |
| 2     | 1237.534      | 4.124  | 41    | 585.940       | 1.953  | 80    | 377.441       | 1.258  | 80    | 377.441       | 28.9   |
| 3     | 1230.392      | 4.101  | 42    | 580.996       | 1.936  | 81    | 370.299       | 1.234  | 81    | 370.299       | 18.1   |
| 4     | 1115.292      | 3.717  | 43    | 579.347       | 1.931  | 82    | 363.981       | 1.213  | 82    | 363.981       | 12.2   |
| 5     | 1106.776      | 3.689  | 44    | 575.227       | 1.917  | 83    | 356.564       | 1.188  | 83    | 356.564       | 15.4   |
| 6     | 1097.986      | 3.659  | 45    | 573.853       | 1.913  | 84    | 353.817       | 1.179  | 84    | 353.817       | 15.0   |
| 7     | 1066.670      | 3.555  | 46    | 524.132       | 1.747  | 85    | 351.894       | 1.173  | 85    | 351.894       | 17.2   |
| 8     | 774.111       | 2.580  | 47    | 520.836       | 1.736  | 86    | 344.752       | 1.149  | 86    | 344.752       | 14.9   |
| 9     | 769.991       | 2.566  | 48    | 516.715       | 1.722  | 87    | 340.082       | 1.133  | 87    | 340.082       | 9.2    |
| 10    | 760.926       | 2.536  | 49    | 511.771       | 1.706  | 88    | 332.665       | 1.109  | 88    | 332.665       | 6.9    |
| 11    | 755.157       | 2.517  | 50    | 508.749       | 1.696  | 89    | 287.613       | 0.959  | 89    | 287.613       | 5.0    |
| 12    | 737.027       | 2.456  | 51    | 504.079       | 1.680  | 90    | 276.351       | 0.921  | 90    | 276.351       | 200.0  |
| 13    | 733.181       | 2.444  | 52    | 501.057       | 1.670  |       |               |        |       |               |        |
| 14    | 729.060       | 2.430  | 53    | 497.211       | 1.657  |       |               |        |       |               |        |
| 15    | 721.369       | 2.404  | 54    | 493.366       | 1.644  |       |               |        |       |               |        |
| 16    | 716.973       | 2.390  | 55    | 489.794       | 1.632  |       |               |        |       |               |        |
| 17    | 713.128       | 2.377  | 56    | 486.773       | 1.622  |       |               |        |       |               |        |
| 18    | 705.436       | 2.351  | 57    | 483.476       | 1.611  |       |               |        |       |               |        |
| 19    | 700.217       | 2.334  | 58    | 478.532       | 1.595  |       |               |        |       |               |        |
| 20    | 690.877       | 2.303  | 59    | 477.158       | 1.590  |       |               |        |       |               |        |
| 21    | 688.679       | 2.295  | 60    | 473.862       | 1.579  |       |               |        |       |               |        |
| 22    | 685.932       | 2.286  | 61    | 470.016       | 1.566  |       |               |        |       |               |        |
| 23    | 684.009       | 2.280  | 62    | 466.170       | 1.554  |       |               |        |       |               |        |
| 24    | 674.394       | 2.248  | 63    | 461.775       | 1.539  |       |               |        |       |               |        |
| 25    | 669.450       | 2.231  | 64    | 456.006       | 1.520  |       |               |        |       |               |        |
| 26    | 645.001       | 2.150  | 65    | 452.160       | 1.507  |       |               |        |       |               |        |
| 27    | 640.331       | 2.134  | 66    | 447.765       | 1.492  |       |               |        |       |               |        |
| 28    | 636.760       | 2.122  | 67    | 442.820       | 1.476  |       |               |        |       |               |        |
| 29    | 632.914       | 2.109  | 68    | 437.601       | 1.458  |       |               |        |       |               |        |
| 30    | 630.167       | 2.100  | 69    | 434.030       | 1.447  |       |               |        |       |               |        |
| 31    | 627.695       | 2.092  | 70    | 431.558       | 1.438  |       |               |        |       |               |        |
| 32    | 624.673       | 2.082  | 71    | 428.261       | 1.427  |       |               |        |       |               |        |
| 33    | 621.652       | 2.072  | 72    | 425.789       | 1.419  |       |               |        |       |               |        |
| 34    | 619.729       | 2.065  | 73    | 419.471       | 1.398  |       |               |        |       |               |        |
| 35    | 616.707       | 2.055  | 74    | 413.702       | 1.379  |       |               |        |       |               |        |
| 36    | 613.136       | 2.043  | 75    | 407.384       | 1.358  |       |               |        |       |               |        |
| 37    | 609.015       | 2.030  | 76    | 402.988       | 1.343  |       |               |        |       |               |        |
| 38    | 593.632       | 1.978  | 77    | 396.945       | 1.323  |       |               |        |       |               |        |
| 39    | 591.984       | 1.973  | 78    | 392.000       | 1.306  |       |               |        |       |               |        |

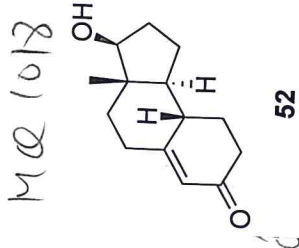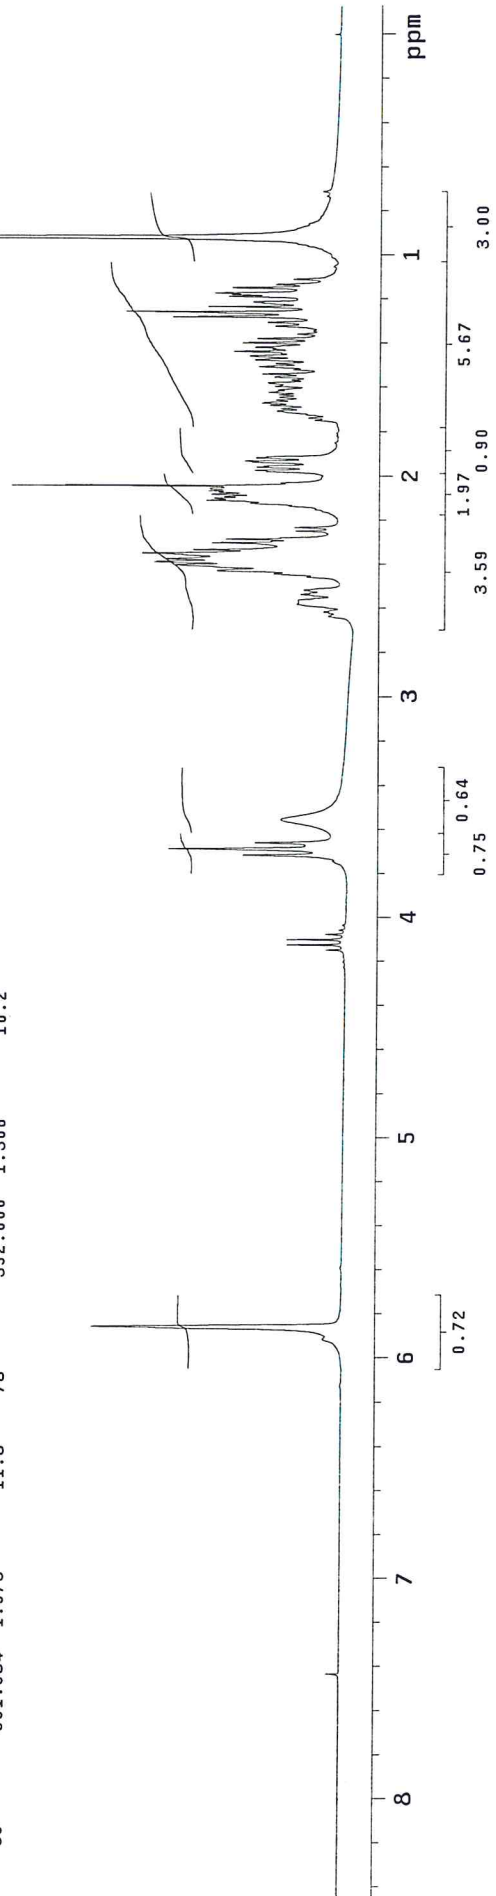

1018

| INDEX | FREQUENCY | PPM     | HEIGHT |
|-------|-----------|---------|--------|
| 1     | 15085.672 | 199.951 | 12.0   |
| 2     | 12605.180 | 167.073 | 14.4   |
| 3     | 9419.248  | 124.846 | 38.9   |
| 4     | 6058.102  | 80.296  | 37.9   |
| 5     | 3802.068  | 50.394  | 31.0   |
| 6     | 3234.051  | 42.865  | 25.0   |
| 7     | 2877.896  | 38.145  | 37.7   |
| 8     | 2757.650  | 36.551  | 32.3   |
| 9     | 2694.664  | 35.716  | 34.9   |
| 10    | 2365.994  | 31.360  | 30.5   |
| 11    | 2259.490  | 29.948  | 37.8   |
| 12    | 2039.613  | 27.034  | 32.6   |
| 13    | 1751.024  | 23.209  | 30.4   |
| 14    | 776.463   | 10.292  | 29.4   |

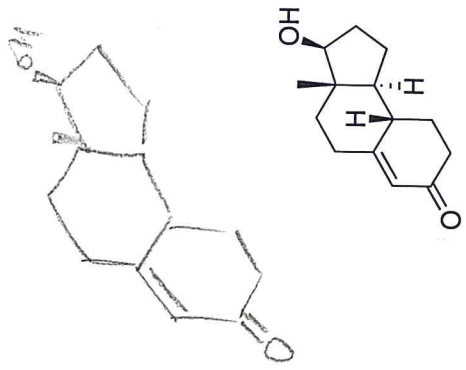

52

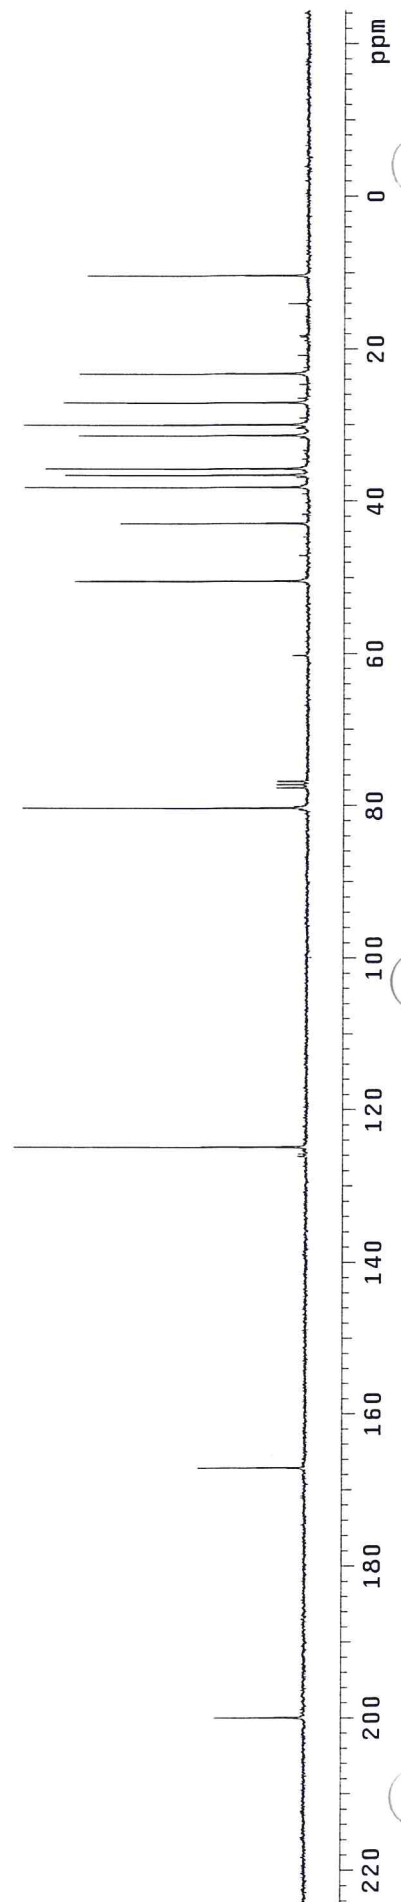

| INDEX | FREQUENCY | PPM   | HEIGHT | INDEX | FREQUENCY | PPM   | HEIGHT |
|-------|-----------|-------|--------|-------|-----------|-------|--------|
| 1     | 1740.448  | 5.801 | 20.2   | 40    | 422.975   | 1.410 | 17.7   |
| 2     | 751.794   | 2.506 | 16.1   | 41    | 416.657   | 1.389 | 17.6   |
| 3     | 742.179   | 2.474 | 20.8   | 42    | 410.339   | 1.368 | 15.6   |
| 4     | 732.290   | 2.441 | 27.2   | 43    | 405.119   | 1.350 | 9.2    |
| 5     | 724.049   | 2.413 | 35.6   | 44    | 397.427   | 1.325 | 6.7    |
| 6     | 710.588   | 2.368 | 18.7   | 45    | 348.805   | 1.162 | 6.2    |
| 7     | 707.017   | 2.356 | 20.5   | 46    | 344.959   | 1.150 | 5.8    |
| 8     | 689.161   | 2.297 | 10.3   | 47    | 338.916   | 1.130 | 6.0    |
| 9     | 684.492   | 2.281 | 11.1   | 48    | 286.173   | 0.954 | 100.0  |
| 10    | 674.602   | 2.248 | 10.7   |       |           |       |        |
| 11    | 669.932   | 2.233 | 12.5   |       |           |       |        |
| 12    | 653.175   | 2.177 | 12.8   |       |           |       |        |
| 13    | 646.308   | 2.154 | 14.7   |       |           |       |        |
| 14    | 637.243   | 2.124 | 19.9   |       |           |       |        |
| 15    | 628.178   | 2.094 | 15.7   |       |           |       |        |
| 16    | 618.288   | 2.061 | 10.5   |       |           |       |        |
| 17    | 609.498   | 2.031 | 15.4   |       |           |       |        |
| 18    | 603.729   | 2.012 | 10.8   |       |           |       |        |
| 19    | 597.411   | 1.991 | 10.6   |       |           |       |        |
| 20    | 591.642   | 1.972 | 10.3   |       |           |       |        |
| 21    | 583.401   | 1.944 | 7.7    |       |           |       |        |
| 22    | 555.931   | 1.853 | 9.7    |       |           |       |        |
| 23    | 550.711   | 1.835 | 9.5    |       |           |       |        |
| 24    | 543.294   | 1.811 | 10.8   |       |           |       |        |
| 25    | 538.625   | 1.795 | 9.5    |       |           |       |        |
| 26    | 504.287   | 1.681 | 4.1    |       |           |       |        |
| 27    | 496.320   | 1.654 | 7.3    |       |           |       |        |
| 28    | 492.749   | 1.642 | 7.9    |       |           |       |        |
| 29    | 483.959   | 1.613 | 12.1   |       |           |       |        |
| 30    | 480.937   | 1.603 | 9.6    |       |           |       |        |
| 31    | 474.894   | 1.583 | 11.8   |       |           |       |        |
| 32    | 472.147   | 1.574 | 11.4   |       |           |       |        |
| 33    | 465.004   | 1.550 | 11.5   |       |           |       |        |
| 34    | 462.532   | 1.542 | 11.0   |       |           |       |        |
| 35    | 454.566   | 1.515 | 8.7    |       |           |       |        |
| 36    | 451.819   | 1.506 | 9.1    |       |           |       |        |
| 37    | 441.380   | 1.471 | 6.7    |       |           |       |        |
| 38    | 435.336   | 1.451 | 10.9   |       |           |       |        |
| 39    | 429.018   | 1.430 | 14.1   |       |           |       |        |

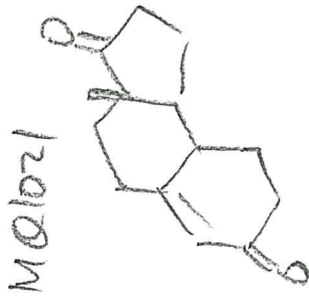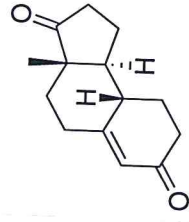

53

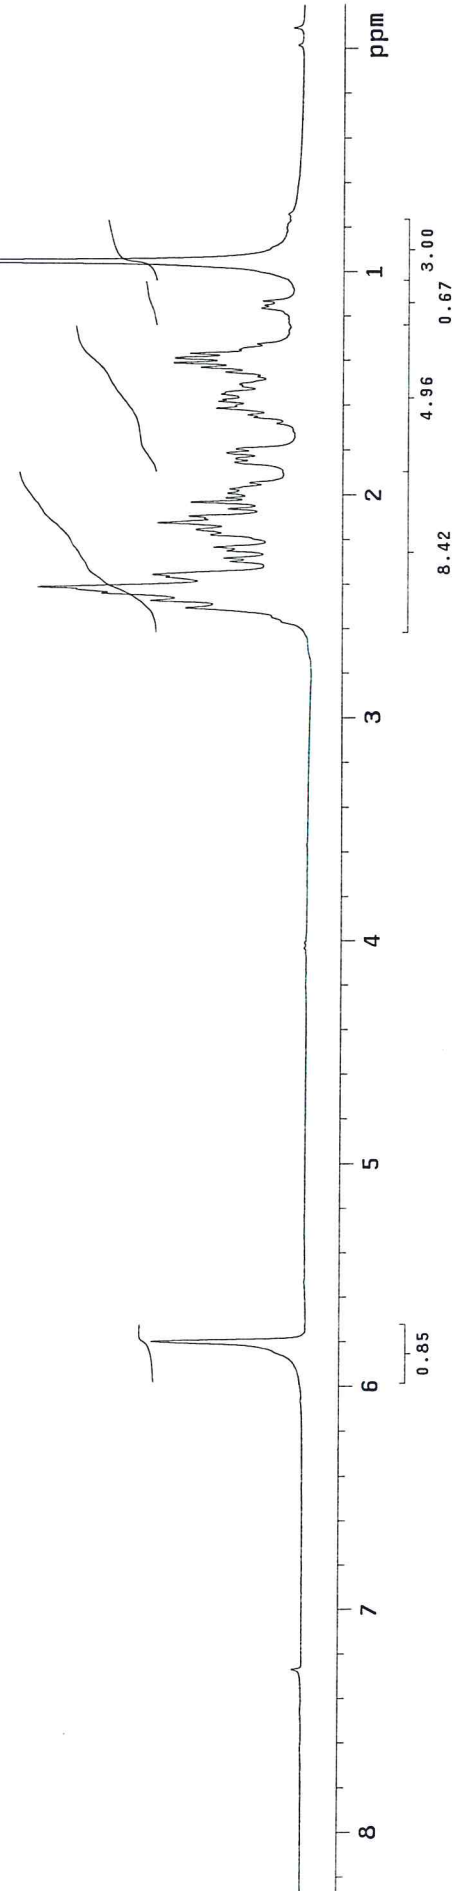

401021

| INDEX | FREQUENCY | PPM     | HEIGHT |
|-------|-----------|---------|--------|
| 1     | 16513.729 | 218.879 | 4.8    |
| 2     | 15016.960 | 199.040 | 5.8    |
| 3     | 12404.770 | 164.417 | 8.6    |
| 4     | 9500.556  | 125.924 | 29.7   |
| 5     | 5857.692  | 77.640  | 5.2    |
| 6     | 5825.626  | 77.215  | 5.9    |
| 7     | 5793.561  | 76.790  | 5.7    |
| 8     | 3818.100  | 50.606  | 29.6   |
| 9     | 3587.916  | 47.555  | 9.3    |
| 10    | 2834.377  | 37.568  | 31.3   |
| 11    | 2762.230  | 36.612  | 33.1   |
| 12    | 2699.244  | 35.777  | 36.0   |
| 13    | 2327.056  | 30.844  | 35.7   |
| 14    | 2321.330  | 30.768  | 31.9   |
| 15    | 2010.982  | 26.654  | 34.0   |
| 16    | 1650.246  | 21.873  | 31.4   |
| 17    | 982.597   | 13.024  | 25.4   |

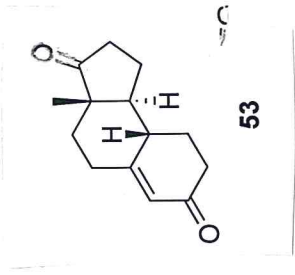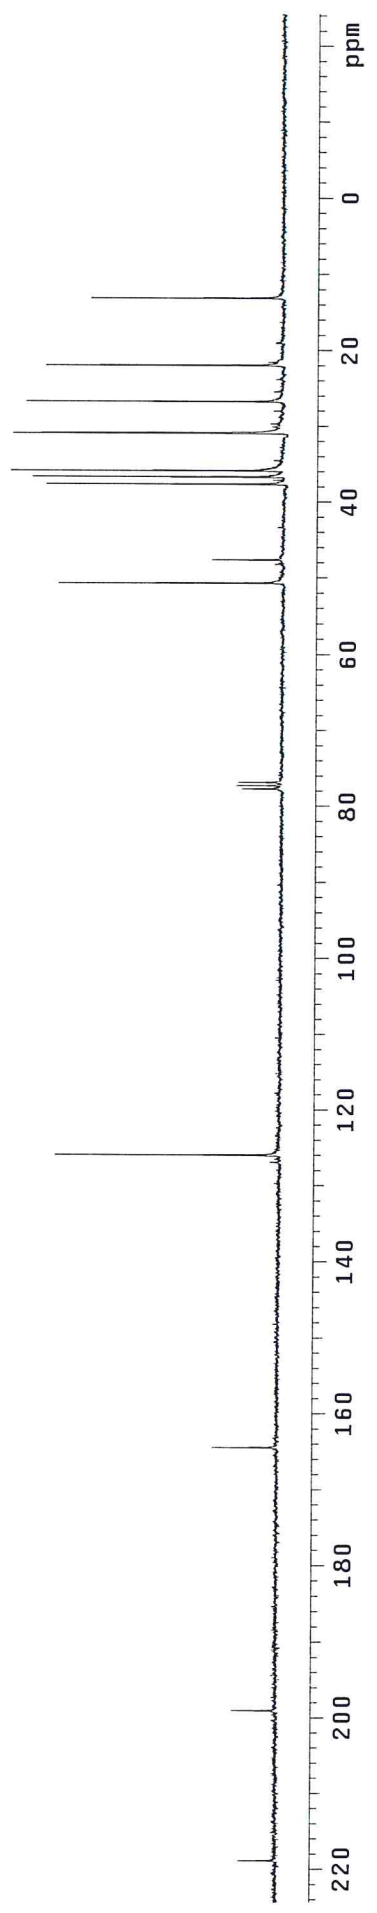

1025

100% MeO

| INDEX | FREQUENCY PPM | HEIGHT |
|-------|---------------|--------|-------|---------------|--------|-------|---------------|--------|-------|---------------|--------|
| 1     | 2180.952      | 7.269  | 40    | 519.002       | 1.730  | 79    | 320.118       | 1.067  | 87.4  |               |        |
| 2     | 2157.053      | 7.189  | 41    | 516.255       | 1.721  | 80    | 316.546       | 1.055  | 85.5  |               |        |
| 3     | 2125.187      | 7.083  | 42    | 514.332       | 1.714  | 81    | 300.888       | 1.003  | 1.6   |               |        |
| 4     | 2122.990      | 7.076  | 43    | 511.585       | 1.705  | 82    | 297.043       | 0.990  | 1.4   |               |        |
| 5     | 2116.397      | 7.054  | 44    | 504.168       | 1.680  | 83    | 288.252       | 0.961  | 1.5   |               |        |
| 6     | 2114.199      | 7.046  | 45    | 502.245       | 1.674  | 84    | 284.132       | 0.947  | 1.6   |               |        |
| 7     | 2039.480      | 6.797  | 46    | 498.949       | 1.663  | 85    | 280.835       | 0.936  | 1.2   |               |        |
| 8     | 2031.239      | 6.770  | 47    | 497.026       | 1.656  | 86    | 275.066       | 0.917  | 1.6   |               |        |
| 9     | 1841.145      | 6.136  | 49    | 462.963       | 1.543  | 87    | 270.946       | 0.903  | 0.8   |               |        |
| 10    | 1127.743      | 3.759  | 49    | 457.194       | 1.524  | 88    | 256.936       | 0.856  | 0.6   |               |        |
| 11    | 1120.600      | 3.735  | 50    | 453.348       | 1.511  | 89    | 253.365       | 0.844  | 0.6   |               |        |
| 12    | 1114.832      | 3.716  | 51    | 448.404       | 1.494  | 90    | 241.278       | 0.804  | 23.9  |               |        |
| 13    | 1002.478      | 3.341  | 52    | 444.832       | 1.483  | 91    | 237.982       | 0.793  | 23.3  |               |        |
| 14    | 995.061       | 3.316  | 53    | 440.987       | 1.470  | 92    | 12.176        | 0.041  | 0.5   |               |        |
| 15    | 987.919       | 3.293  | 54    | 436.866       | 1.456  | 93    | 7.231         | 0.024  | 2.3   |               |        |
| 16    | 986.271       | 3.287  | 55    | 432.746       | 1.442  | 94    | 3.660         | 0.012  | 44.7  |               |        |
| 17    | 815.406       | 2.718  | 56    | 429.174       | 1.430  | 95    | 0.089         | 0.000  | 2.1   |               |        |
| 18    | 803.319       | 2.667  | 57    | 425.329       | 1.418  | 96    | -3.757        | -0.013 | 0.5   |               |        |
| 19    | 800.297       | 2.667  | 58    | 423.406       | 1.411  | 97    | -18.041       | -0.060 | 3.8   |               |        |
| 20    | 787.661       | 2.625  | 59    | 420.933       | 1.403  |       |               |        |       |               |        |
| 21    | 724.480       | 2.415  | 60    | 416.813       | 1.389  |       |               |        |       |               |        |
| 22    | 716.238       | 2.387  | 61    | 412.143       | 1.374  |       |               |        |       |               |        |
| 23    | 711.294       | 2.371  | 62    | 409.121       | 1.364  |       |               |        |       |               |        |
| 24    | 667.067       | 2.223  | 63    | 405.001       | 1.350  |       |               |        |       |               |        |
| 25    | 651.409       | 2.171  | 64    | 400.056       | 1.333  |       |               |        |       |               |        |
| 26    | 640.146       | 2.133  | 65    | 394.012       | 1.313  |       |               |        |       |               |        |
| 27    | 627.510       | 2.091  | 66    | 388.244       | 1.294  |       |               |        |       |               |        |
| 28    | 611.577       | 2.038  | 67    | 381.926       | 1.273  |       |               |        |       |               |        |
| 29    | 598.391       | 1.994  | 68    | 376.432       | 1.255  |       |               |        |       |               |        |
| 30    | 571.470       | 1.905  | 69    | 370.388       | 1.234  |       |               |        |       |               |        |
| 31    | 565.702       | 1.885  | 70    | 364.619       | 1.215  |       |               |        |       |               |        |
| 32    | 557.735       | 1.859  | 71    | 358.576       | 1.195  |       |               |        |       |               |        |
| 33    | 546.198       | 1.820  | 72    | 352.807       | 1.176  |       |               |        |       |               |        |
| 34    | 543.451       | 1.811  | 73    | 347.862       | 1.159  |       |               |        |       |               |        |
| 35    | 539.055       | 1.797  | 74    | 343.193       | 1.144  |       |               |        |       |               |        |
| 36    | 533.287       | 1.777  | 75    | 334.677       | 1.115  |       |               |        |       |               |        |
| 37    | 528.342       | 1.761  | 76    | 330.007       | 1.100  |       |               |        |       |               |        |
| 38    | 526.144       | 1.754  | 77    | 326.161       | 1.087  |       |               |        |       |               |        |
| 39    | 521.200       | 1.737  | 78    | 324.513       | 1.082  |       |               |        |       |               |        |

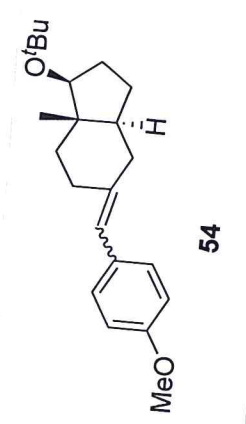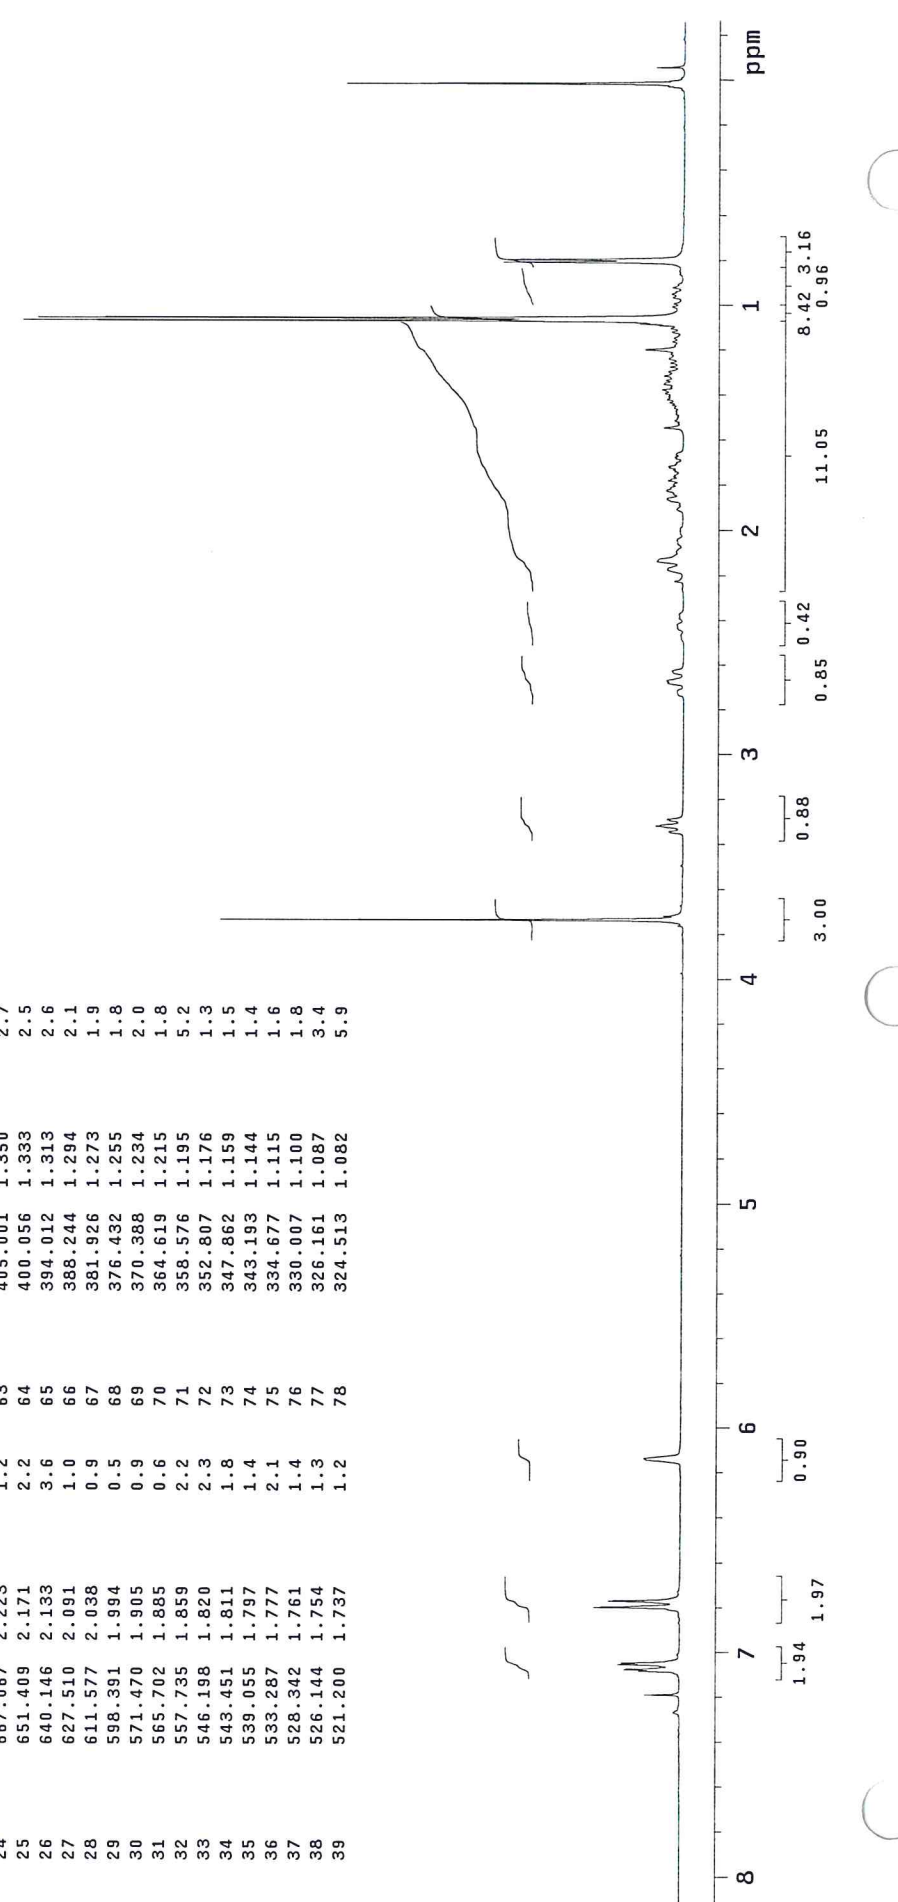



1081

| INDEX | FREQUENCY | PPM     | HEIGHT |
|-------|-----------|---------|--------|
| 1     | 11919.207 | 157.981 | 4.5    |
| 2     | 10678.961 | 141.543 | 4.2    |
| 3     | 10670.944 | 141.436 | 4.6    |
| 4     | 9902.519  | 131.251 | 2.4    |
| 5     | 9887.631  | 131.054 | 2.8    |
| 6     | 9831.516  | 130.310 | 25.9   |
| 7     | 9273.807  | 122.918 | 7.1    |
| 8     | 9257.774  | 122.706 | 9.6    |
| 9     | 8576.383  | 113.674 | 19.9   |
| 10    | 6083.294  | 80.630  | 9.2    |
| 11    | 6077.568  | 80.554  | 9.1    |
| 12    | 5856.545  | 77.625  | 19.1   |
| 13    | 5824.480  | 77.200  | 18.3   |
| 14    | 5792.415  | 76.775  | 17.4   |
| 15    | 5461.453  | 72.388  | 7.1    |
| 16    | 4181.125  | 55.418  | 12.0   |
| 17    | 3489.428  | 46.250  | 8.5    |
| 18    | 3443.620  | 45.643  | 9.6    |
| 19    | 3228.323  | 42.789  | 3.7    |
| 20    | 3223.743  | 42.729  | 3.6    |
| 21    | 2885.910  | 38.251  | 8.0    |
| 22    | 2846.974  | 37.735  | 7.2    |
| 23    | 2838.957  | 37.629  | 9.0    |
| 24    | 2488.528  | 32.984  | 9.8    |
| 25    | 2380.879  | 31.557  | 8.1    |
| 26    | 2370.573  | 31.420  | 8.0    |
| 27    | 2256.053  | 29.902  | 2.4    |
| 28    | 2243.456  | 29.736  | 8.9    |
| 29    | 2183.906  | 28.946  | 41.9   |
| 30    | 1968.609  | 26.093  | 15.7   |
| 31    | 1866.687  | 24.742  | 9.9    |
| 32    | 797.075   | 10.565  | 11.7   |
| 33    | 90.490    | 1.199   | 8.0    |

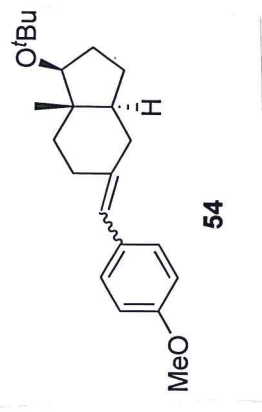

54

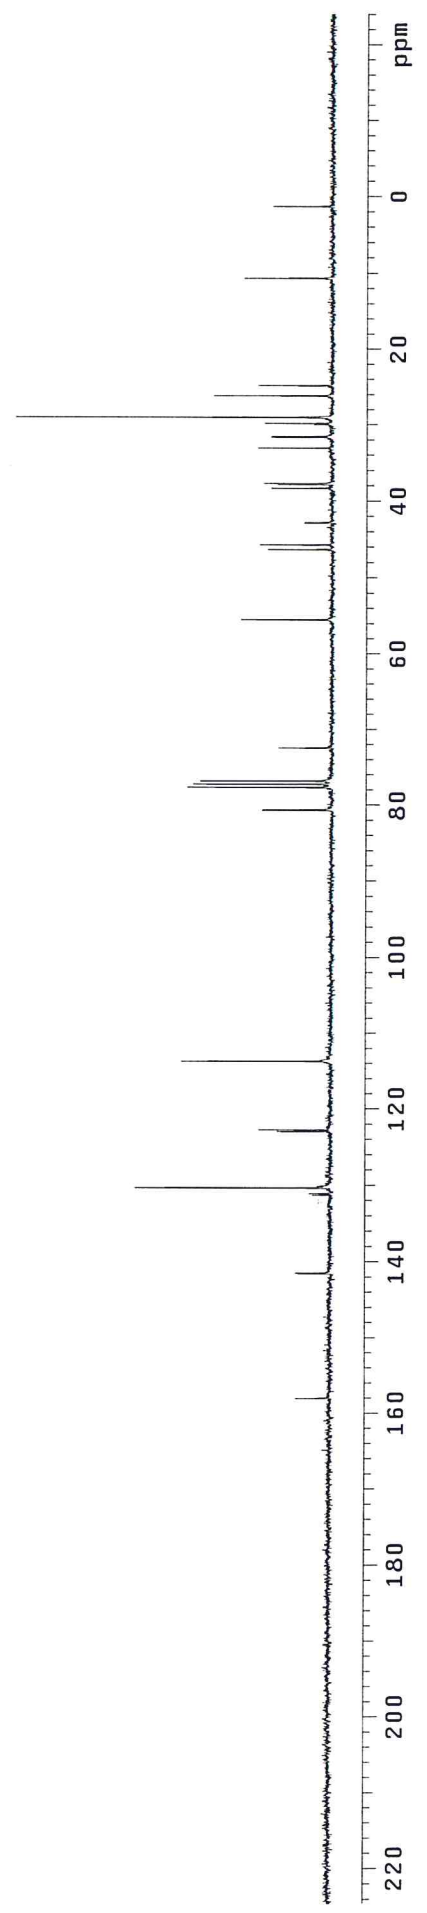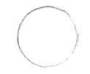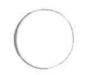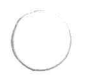

1145

| INDEX | FREQUENCY PPM | HEIGHT | INDEX | FREQUENCY PPM | HEIGHT  | INDEX | FREQUENCY PPM | HEIGHT  | INDEX  | FREQUENCY PPM | HEIGHT |
|-------|---------------|--------|-------|---------------|---------|-------|---------------|---------|--------|---------------|--------|
| 1     | 2177.841      | 7.258  | 1.5   | 40            | 531.275 | 1.771 | 79            | 279.922 | 0.933  | 2.1           |        |
| 2     | 2173.720      | 7.245  | 4.2   | 41            | 527.429 | 1.758 | 80            | 272.230 | 0.907  | 1.7           |        |
| 3     | 2169.875      | 7.232  | 31.1  | 42            | 525.231 | 1.750 | 81            | 265.637 | 0.885  | 1.6           |        |
| 4     | 2167.128      | 7.223  | 9.8   | 43            | 522.759 | 1.742 | 82            | 238.991 | 0.797  | 5.9           |        |
| 5     | 2164.930      | 7.215  | 6.9   | 44            | 510.122 | 1.700 | 83            | 226.355 | 0.754  | 30.3          |        |
| 6     | 2161.084      | 7.202  | 1.7   | 45            | 505.178 | 1.684 | 84            | 224.432 | 0.748  | 26.5          |        |
| 7     | 2137.460      | 7.124  | 1.9   | 46            | 502.705 | 1.675 | 85            | 218.388 | 0.728  | 2.2           |        |
| 8     | 2102.298      | 7.007  | 7.8   | 47            | 495.288 | 1.651 | 86            | -0.000  | -0.000 | 12.1          |        |
| 9     | 2100.650      | 7.001  | 7.8   | 48            | 490.619 | 1.635 | 87            | -24.723 | -0.082 | 1.4           |        |
| 10    | 2093.782      | 6.978  | 10.0  | 49            | 486.498 | 1.621 |               |         |        |               |        |
| 11    | 2091.859      | 6.972  | 7.3   | 50            | 472.488 | 1.575 |               |         |        |               |        |
| 12    | 2023.733      | 6.745  | 16.2  | 51            | 437.052 | 1.457 |               |         |        |               |        |
| 13    | 2017.140      | 6.723  | 6.0   | 52            | 430.733 | 1.436 |               |         |        |               |        |
| 14    | 2015.217      | 6.716  | 11.7  | 53            | 427.712 | 1.425 |               |         |        |               |        |
| 15    | 1565.529      | 5.218  | 1.7   | 54            | 424.965 | 1.416 |               |         |        |               |        |
| 16    | 1560.310      | 5.200  | 2.7   | 55            | 421.394 | 1.404 |               |         |        |               |        |
| 17    | 1558.112      | 5.193  | 2.7   | 56            | 418.921 | 1.396 |               |         |        |               |        |
| 18    | 1109.248      | 3.697  | 5.3   | 57            | 414.526 | 1.382 |               |         |        |               |        |
| 19    | 1102.381      | 3.674  | 69.2  | 58            | 412.328 | 1.374 |               |         |        |               |        |
| 20    | 997.719       | 3.325  | 2.8   | 59            | 406.560 | 1.355 |               |         |        |               |        |
| 21    | 990.302       | 3.300  | 4.3   | 60            | 403.263 | 1.344 |               |         |        |               |        |
| 22    | 988.929       | 3.296  | 4.0   | 61            | 395.022 | 1.317 |               |         |        |               |        |
| 23    | 981.787       | 3.272  | 3.7   | 62            | 392.550 | 1.308 |               |         |        |               |        |
| 24    | 970.249       | 3.234  | 2.4   | 63            | 390.077 | 1.300 |               |         |        |               |        |
| 25    | 966.953       | 3.223  | 2.7   | 64            | 383.759 | 1.279 |               |         |        |               |        |
| 26    | 959.810       | 3.199  | 6.2   | 65            | 376.342 | 1.254 |               |         |        |               |        |
| 27    | 952.668       | 3.175  | 4.0   | 66            | 371.398 | 1.238 |               |         |        |               |        |
| 28    | 748.015       | 2.493  | 2.3   | 67            | 365.629 | 1.219 |               |         |        |               |        |
| 29    | 737.576       | 2.458  | 1.6   | 68            | 352.718 | 1.176 |               |         |        |               |        |
| 30    | 604.345       | 2.014  | 2.4   | 69            | 341.180 | 1.137 |               |         |        |               |        |
| 31    | 592.258       | 1.974  | 4.0   | 70            | 326.346 | 1.088 |               |         |        |               |        |
| 32    | 589.511       | 1.965  | 3.9   | 71            | 314.260 | 1.047 |               |         |        |               |        |
| 33    | 582.644       | 1.942  | 2.5   | 72            | 312.337 | 1.041 |               |         |        |               |        |
| 34    | 576.326       | 1.921  | 1.4   | 73            | 301.623 | 1.005 |               |         |        |               |        |
| 35    | 551.328       | 1.837  | 1.5   | 74            | 299.700 | 0.999 |               |         |        |               |        |
| 36    | 549.680       | 1.832  | 1.7   | 75            | 297.503 | 0.992 |               |         |        |               |        |
| 37    | 545.559       | 1.818  | 2.0   | 76            | 293.108 | 0.977 |               |         |        |               |        |
| 38    | 540.614       | 1.802  | 2.0   | 77            | 288.438 | 0.961 |               |         |        |               |        |
| 39    | 536.769       | 1.789  | 2.1   | 78            | 284.592 | 0.948 |               |         |        |               |        |

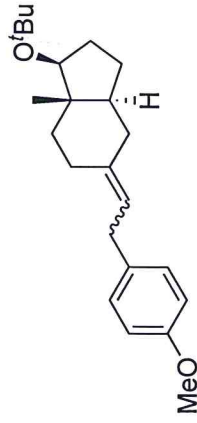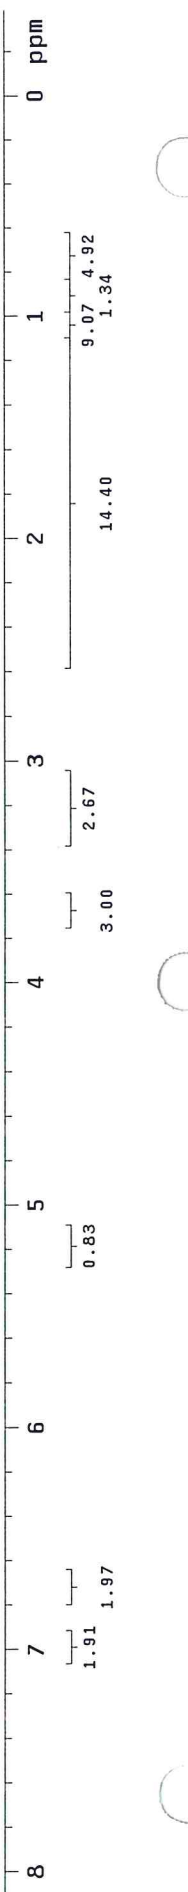

1145

| INDEX | FREQUENCY | PPM     | HEIGHT |
|-------|-----------|---------|--------|
| 1     | 11916.917 | 157.951 | 3.7    |
| 2     | 10541.538 | 139.721 | 5.9    |
| 3     | 10113.235 | 134.044 | 10.7   |
| 4     | 10093.766 | 133.786 | 10.7   |
| 5     | 9758.224  | 129.339 | 28.9   |
| 6     | 9721.578  | 128.853 | 9.6    |
| 7     | 9710.126  | 128.701 | 9.8    |
| 8     | 9703.255  | 128.610 | 8.9    |
| 9     | 9185.627  | 121.749 | 7.4    |
| 10    | 9168.449  | 121.522 | 7.5    |
| 11    | 8601.578  | 114.008 | 29.5   |
| 12    | 6084.440  | 80.645  | 8.1    |
| 13    | 6078.714  | 80.569  | 8.6    |
| 14    | 5857.691  | 77.640  | 7.1    |
| 15    | 5825.626  | 77.215  | 7.4    |
| 16    | 5794.705  | 76.805  | 7.2    |
| 17    | 5458.018  | 72.342  | 7.9    |
| 18    | 4179.981  | 55.403  | 14.7   |
| 19    | 3503.170  | 46.432  | 7.5    |
| 20    | 3455.072  | 45.795  | 9.1    |
| 21    | 3246.647  | 43.032  | 6.1    |
| 22    | 2895.072  | 38.372  | 7.0    |
| 23    | 2851.555  | 37.795  | 7.9    |
| 24    | 2802.311  | 37.143  | 9.8    |
| 25    | 2488.528  | 32.984  | 9.2    |
| 26    | 2473.640  | 32.786  | 8.7    |
| 27    | 2454.172  | 32.528  | 10.3   |
| 28    | 2382.025  | 31.572  | 9.7    |
| 29    | 2376.299  | 31.496  | 8.7    |
| 30    | 2254.908  | 29.887  | 6.2    |
| 31    | 2182.761  | 28.931  | 50.0   |
| 32    | 2161.002  | 28.643  | 11.2   |
| 33    | 1973.190  | 26.153  | 10.5   |
| 34    | 1962.884  | 26.017  | 10.4   |
| 35    | 1803.701  | 23.907  | 9.6    |
| 36    | 797.075   | 10.565  | 8.2    |
| 37    | 793.640   | 10.519  | 8.0    |

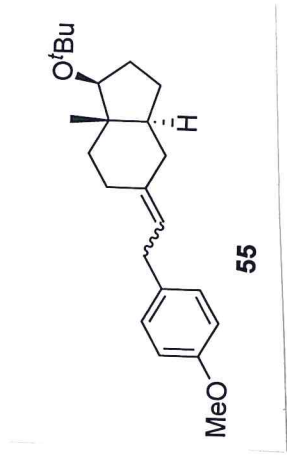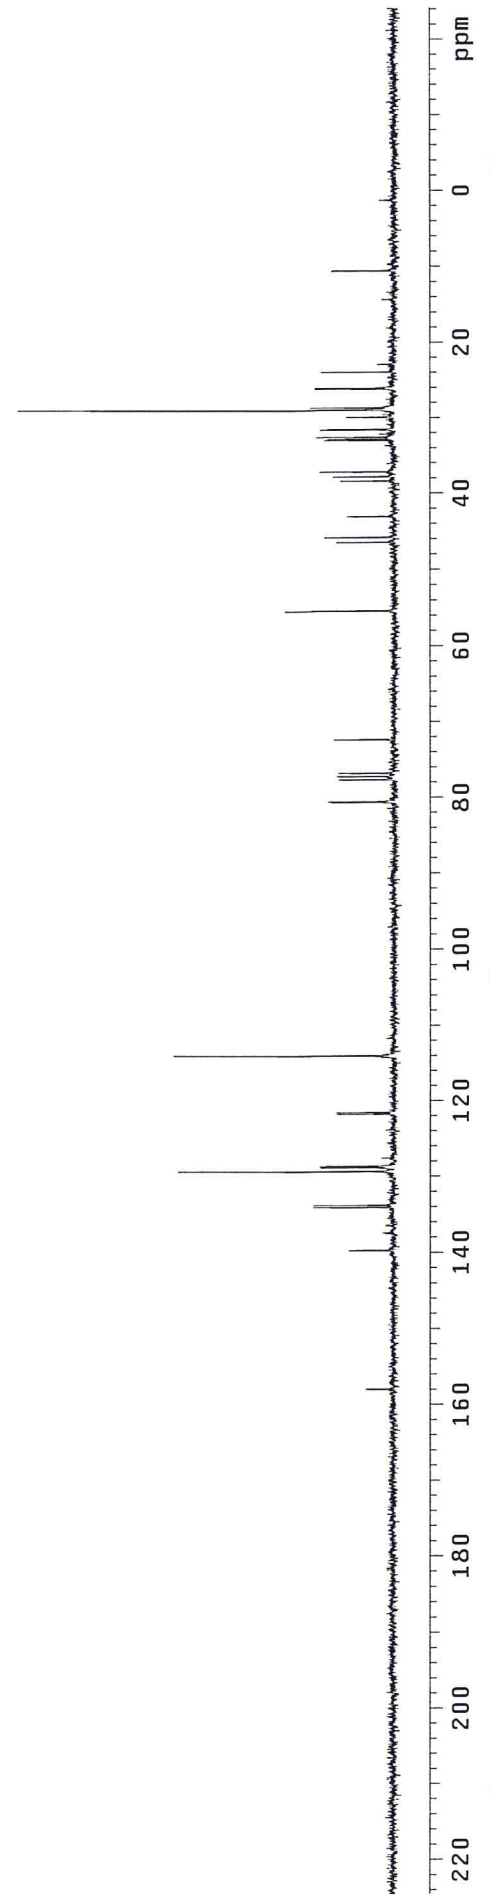

1150

STANDARD 1H OBSERVE

```

exp1 std1h
SAMPLE
date Oct 16 2008
solvent CDCl3
file exp
ACQUISITION
sfrq 300.049
tn H1
at 1.998
np 17984
sw 4500.5
fb 2600
bs 16
tpwr 49
pw 7.0
d1 1.000
tof 0
nt 8
ct 8
alock not used
gain not used
FLAGS
il n
in n
dp y
sp -67.9
wp 2492.1
vs 100
sc 0
wc 250
hzmh 9.97
is 1912.78
rf1 782.1
rfp 0
th 1
ins 3.000
nm cdc ph
DEC. & VT
dfrq 300.049
dn H1
dpwr 30
dof 0
dm nnn
dmm C
dmf 200
wtfile ft
proc not used
fn
werr
wexp
wbs
wnt

```

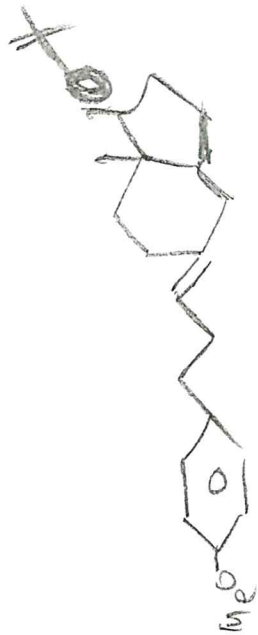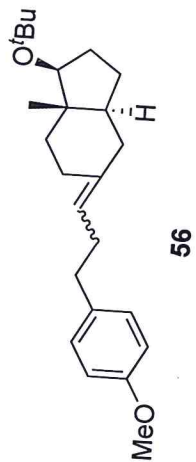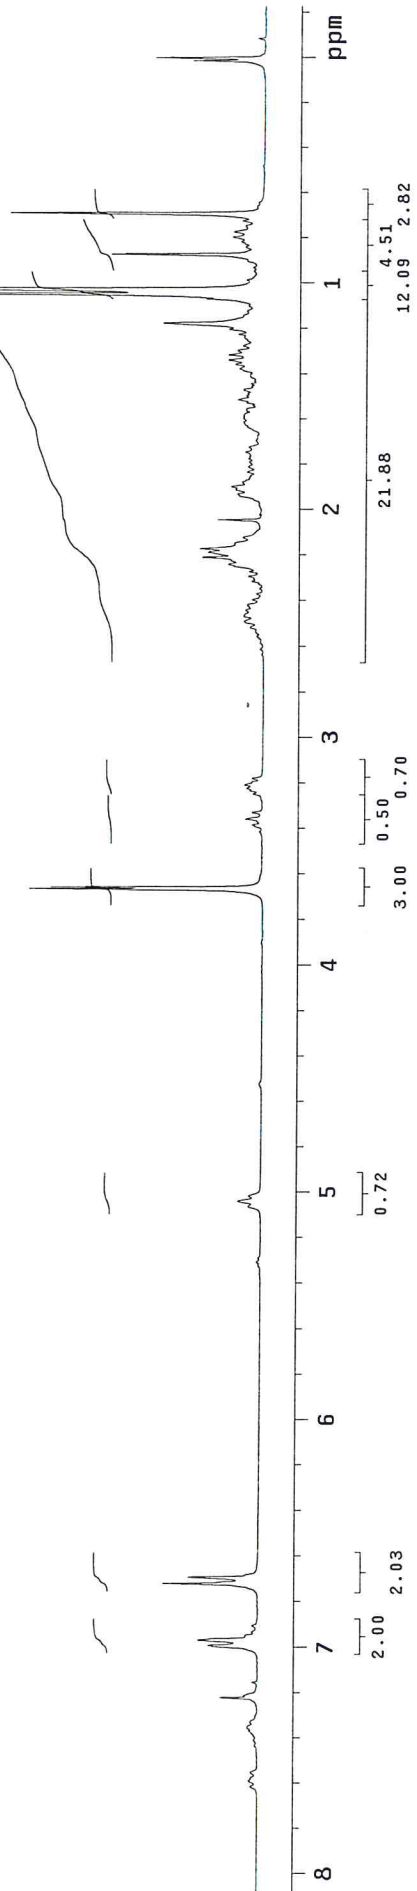

| INDEX | FREQUENCY PPM | HEIGHT  | INDEX | FREQUENCY PPM | HEIGHT |
|-------|---------------|---------|-------|---------------|--------|
| 1     | 11908.901     | 157.845 | 2.8   | 40            |        |
| 2     | 10547.264     | 139.797 | 4.9   | 41            | 4.9    |
| 3     | 10533.522     | 139.615 | 4.2   | 42            | 5.5    |
| 4     | 10143.010     | 134.439 | 4.8   | 43            | 8.8    |
| 5     | 9773.112      | 129.536 | 16.9  | 44            | 55.3   |
| 6     | 9769.677      | 129.491 | 16.4  | 45            | 32.9   |
| 7     | 9761.660      | 129.384 | 4.4   | 46            | 9.6    |
| 8     | 9713.562      | 128.747 | 3.2   | 47            | 9.7    |
| 9     | 9703.255      | 128.610 | 3.2   | 48            | 17.4   |
| 10    | 9694.094      | 128.489 | 2.9   | 49            | 6.1    |
| 11    | 9187.918      | 121.780 | 5.7   | 50            | 11.4   |
| 12    | 9163.869      | 121.461 | 6.7   |               | 6.7    |
| 13    | 8583.255      | 113.765 | 3.7   |               |        |
| 14    | 8575.239      | 113.659 | 21.0  |               |        |
| 15    | 6074.133      | 80.509  | 5.6   |               |        |
| 16    | 6067.262      | 80.418  | 7.7   |               |        |
| 17    | 5996.260      | 79.476  | 6.4   |               |        |
| 18    | 5857.691      | 77.640  | 5.2   |               |        |
| 19    | 5825.626      | 77.215  | 5.0   |               |        |
| 20    | 5793.561      | 76.790  | 5.3   |               |        |
| 21    | 5470.616      | 72.509  | 3.0   |               |        |
| 22    | 5443.131      | 72.145  | 6.9   |               |        |
| 23    | 4165.094      | 55.206  | 10.4  |               |        |
| 24    | 3489.429      | 46.250  | 6.3   |               |        |
| 25    | 3418.427      | 45.309  | 8.1   |               |        |
| 26    | 3370.328      | 44.671  | 6.8   |               |        |
| 27    | 3240.921      | 42.956  | 8.4   |               |        |
| 28    | 3230.615      | 42.820  | 7.6   |               |        |
| 29    | 3177.936      | 42.121  | 2.8   |               |        |
| 30    | 2895.073      | 38.372  | 7.5   |               |        |
| 31    | 2824.070      | 37.431  | 11.6  |               |        |
| 32    | 2794.295      | 37.037  | 7.4   |               |        |
| 33    | 2684.357      | 35.579  | 7.7   |               |        |
| 34    | 2679.776      | 35.519  | 9.6   |               |        |
| 35    | 2664.868      | 35.321  | 7.8   |               |        |
| 36    | 2448.447      | 32.453  | 9.4   |               |        |
| 37    | 2406.074      | 31.891  | 8.5   |               |        |
| 38    | 2372.864      | 31.451  | 8.9   |               |        |
| 39    | 2368.283      | 31.390  | 6.6   |               |        |

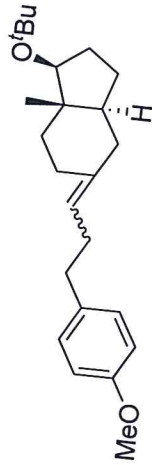

56

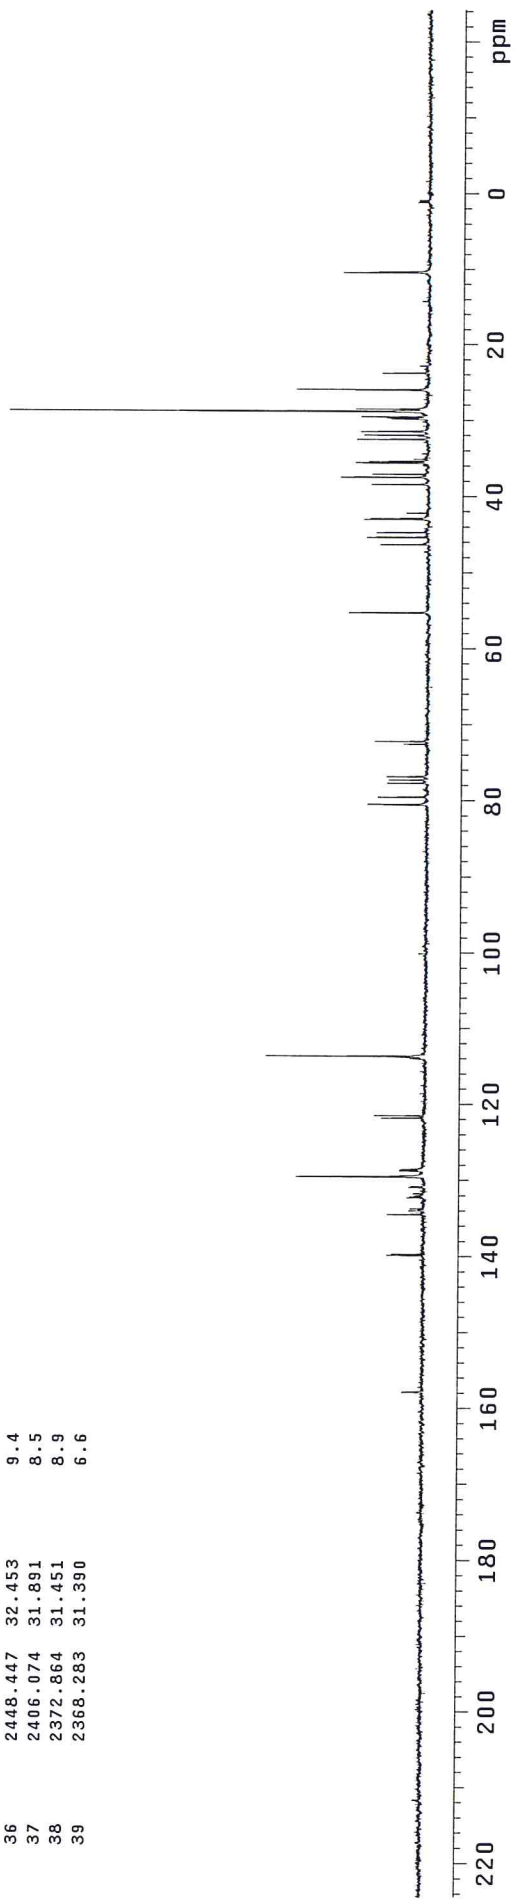

1152

| INDEX | FREQUENCY PPM | HEIGHT | INDEX | FREQUENCY PPM | HEIGHT |
|-------|---------------|--------|-------|---------------|--------|
| 1     | 2107.725      | 7.6    | 40    | 478.190       | 3.4    |
| 2     | 2105.527      | 12.3   | 41    | 475.718       | 3.4    |
| 3     | 2097.011      | 6.4    | 42    | 466.103       | 3.0    |
| 4     | 2017.073      | 4.6    | 43    | 460.884       | 5.9    |
| 5     | 2014.326      | 4.1    | 44    | 453.742       | 3.1    |
| 6     | 2008.557      | 3.8    | 45    | 449.621       | 4.4    |
| 7     | 2006.085      | 3.4    | 46    | 440.556       | 1.7    |
| 8     | 1150.112      | 3.833  | 47    | 438.083       | 1.5    |
| 9     | 1143.794      | 3.812  | 48    | 429.293       | 2.8    |
| 10    | 1134.179      | 3.780  | 49    | 426.821       | 2.4    |
| 11    | 1126.488      | 3.754  | 50    | 417.755       | 4.6    |
| 12    | 817.448       | 3.4    | 51    | 413.086       | 4.1    |
| 13    | 812.228       | 2.707  | 52    | 406.493       | 2.1    |
| 14    | 806.185       | 2.687  | 53    | 400.449       | 2.5    |
| 15    | 660.043       | 2.200  | 54    | 294.963       | 39.9   |
| 16    | 644.385       | 2.148  | 55    | 257.329       | 3.1    |
| 17    | 640.264       | 2.134  | 56    | 227.661       | 3.0    |
| 18    | 635.595       | 2.118  |       |               |        |
| 19    | 631.199       | 2.104  |       |               |        |
| 20    | 626.529       | 2.088  |       |               |        |
| 21    | 622.409       | 2.074  |       |               |        |
| 22    | 608.948       | 2.030  |       |               |        |
| 23    | 605.103       | 2.017  |       |               |        |
| 24    | 595.213       | 1.984  |       |               |        |
| 25    | 591.093       | 1.970  |       |               |        |
| 26    | 586.148       | 1.954  |       |               |        |
| 27    | 581.203       | 1.937  |       |               |        |
| 28    | 577.083       | 1.923  |       |               |        |
| 29    | 569.117       | 1.897  |       |               |        |
| 30    | 556.755       | 1.856  |       |               |        |
| 31    | 543.844       | 1.813  |       |               |        |
| 32    | 534.229       | 1.780  |       |               |        |
| 33    | 524.340       | 1.748  |       |               |        |
| 34    | 519.670       | 1.732  |       |               |        |
| 35    | 510.330       | 1.701  |       |               |        |
| 36    | 507.034       | 1.690  |       |               |        |
| 37    | 498.793       | 1.662  |       |               |        |
| 38    | 494.947       | 1.650  |       |               |        |
| 39    | 491.101       | 1.637  |       |               |        |

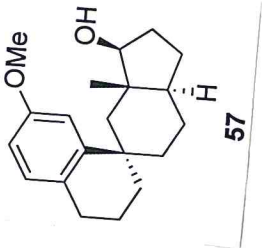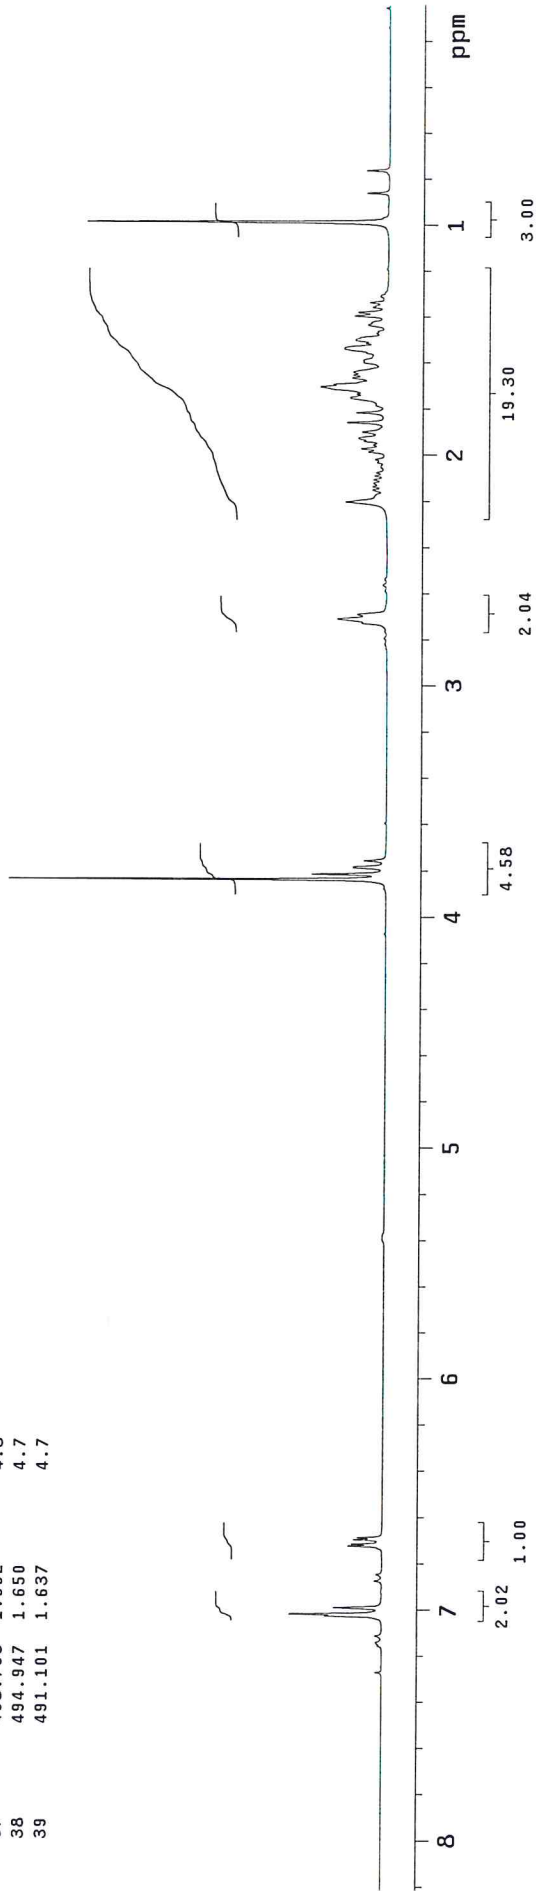

1152

| INDEX | FREQUENCY | PPM     | HEIGHT |
|-------|-----------|---------|--------|
| 1     | 11908.901 | 157.845 | 8.8    |
| 2     | 11132.459 | 147.553 | 8.2    |
| 3     | 9790.290  | 129.764 | 21.8   |
| 4     | 8547.754  | 113.295 | 16.7   |
| 5     | 8351.926  | 110.699 | 13.6   |
| 6     | 6171.475  | 81.799  | 21.1   |
| 7     | 5856.546  | 77.625  | 6.9    |
| 8     | 5825.626  | 77.215  | 7.1    |
| 9     | 5793.561  | 76.790  | 6.7    |
| 10    | 4173.110  | 55.312  | 16.0   |
| 11    | 3244.357  | 43.002  | 11.9   |
| 12    | 3010.737  | 39.905  | 18.8   |
| 13    | 3001.576  | 39.784  | 21.0   |
| 14    | 2924.848  | 38.767  | 17.5   |
| 15    | 2614.500  | 34.653  | 21.1   |
| 16    | 2514.868  | 33.333  | 19.6   |
| 17    | 2488.529  | 32.984  | 19.2   |
| 18    | 2298.426  | 30.464  | 18.6   |
| 19    | 2286.974  | 30.312  | 19.9   |
| 20    | 1943.416  | 25.759  | 18.4   |
| 21    | 1491.064  | 19.763  | 19.2   |
| 22    | 769.591   | 10.200  | 14.7   |

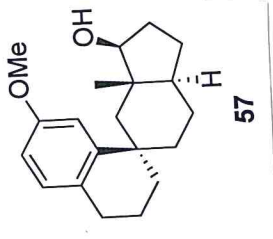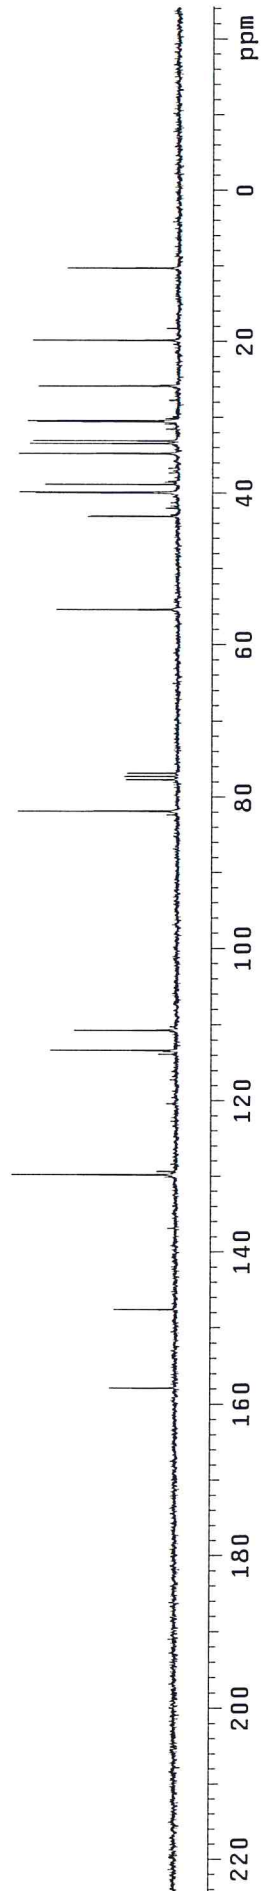

STANDARD 1H OBSERVE

exp1 stdlh  
 SAMPLE DEC. & VT  
 date Aug 1 2008 dfrq 300.049  
 solvent CDC13 dn H1  
 file exp dpwr 30  
 ACQUISITION exp dof 0  
 sfrq 300.049 dm nnn  
 tn 1.998 dmnm C  
 at 17984 dmf 200  
 sw 4500.5 wtfile PROCESSING  
 fb 2600 proc  
 bs 16 fn not used  
 tpwr 49  
 pw 7.0 werr  
 d1 1.000 wexp  
 tof 0 wbs  
 nt 8 wnt  
 ct 8  
 alock n  
 gain not used  
 FLAGS  
 i1 n  
 in n  
 dp y  
 DISPLAY  
 sp -55.2  
 wp 2486.3  
 vs 50  
 sc 0  
 wc 250  
 hzmm 9.95  
 is 1905.45  
 rfl 752.7  
 rfp 0  
 th 1  
 ins 2.000  
 nm cdc ph

1890

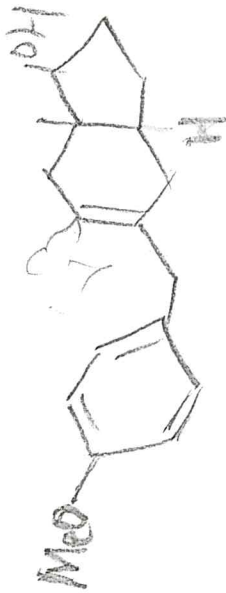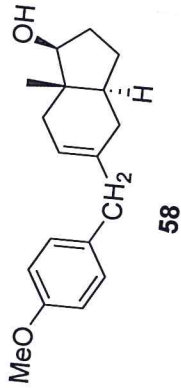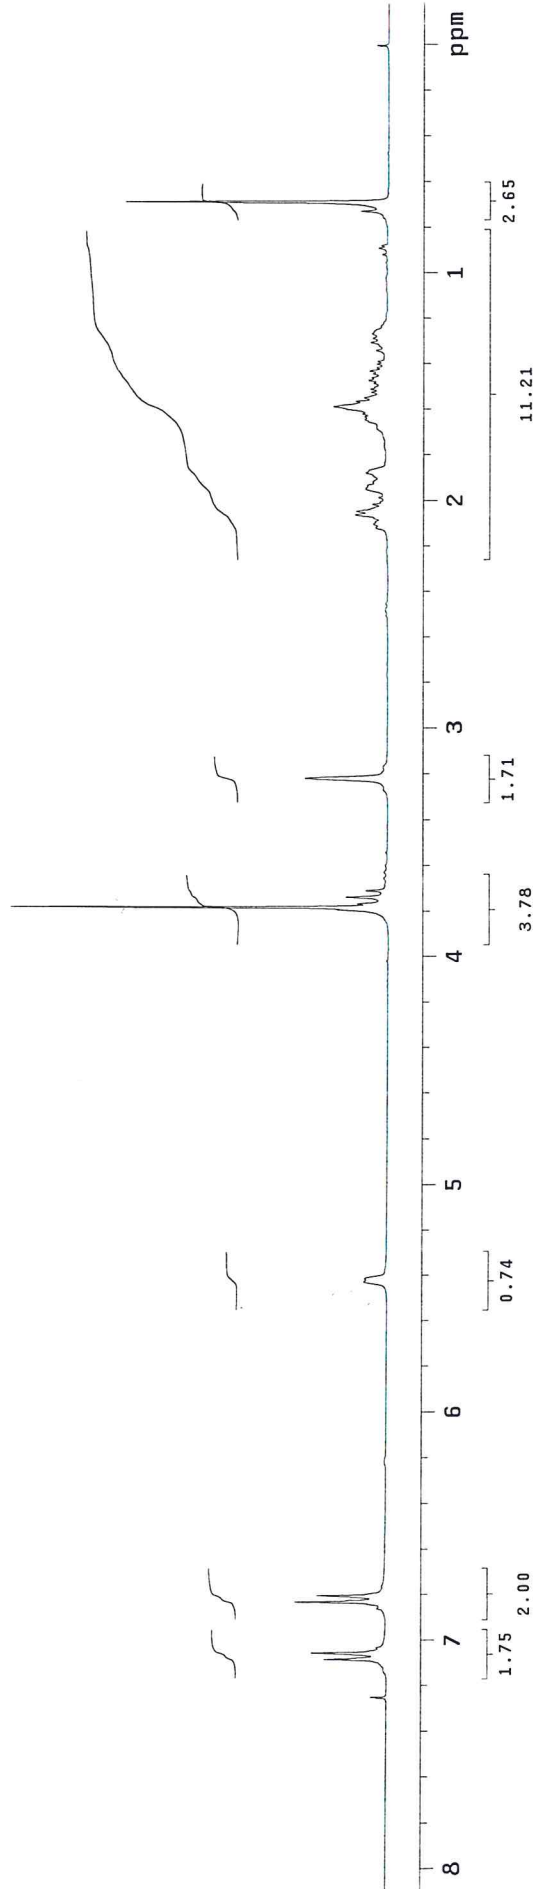



| INDEX | FREQUENCY | PPM     | HEIGHT |
|-------|-----------|---------|--------|
| 1     | 11924.933 | 158.057 | 3.2    |
| 2     | 10334.257 | 136.974 | 7.3    |
| 3     | 10004.441 | 132.602 | 6.7    |
| 4     | 9791.435  | 129.779 | 25.7   |
| 5     | 9193.643  | 121.856 | 13.9   |
| 6     | 8587.835  | 113.826 | 23.8   |
| 7     | 6180.636  | 81.920  | 15.0   |
| 8     | 5857.691  | 77.640  | 8.4    |
| 9     | 5825.626  | 77.215  | 8.5    |
| 10    | 5793.560  | 76.790  | 8.5    |
| 11    | 4177.690  | 55.373  | 12.7   |
| 12    | 3279.858  | 43.472  | 13.8   |
| 13    | 3145.870  | 41.696  | 7.3    |
| 14    | 3117.240  | 41.317  | 11.6   |
| 15    | 2899.653  | 38.433  | 14.5   |
| 16    | 2351.105  | 31.162  | 16.4   |
| 17    | 2332.781  | 30.919  | 15.4   |
| 18    | 1933.108  | 25.622  | 18.6   |
| 19    | 775.317   | 10.276  | 15.4   |

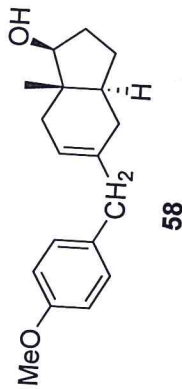

58

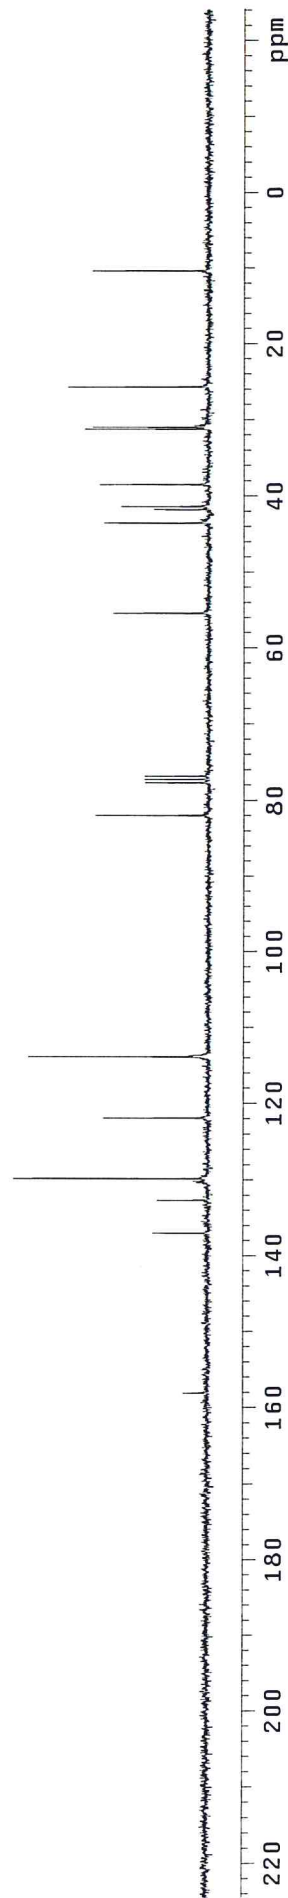

1746

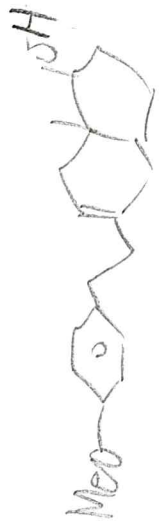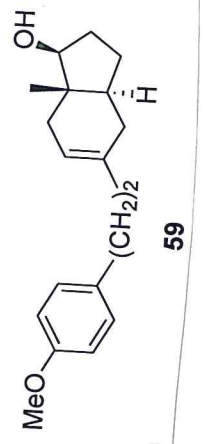

| INDEX | FREQUENCY PPM | HEIGHT | INDEX | FREQUENCY PPM | HEIGHT |
|-------|---------------|--------|-------|---------------|--------|
| 1     | 2135.537      | 7.117  | 40    | 495.014       | 1.650  |
| 2     | 2127.021      | 7.089  | 41    | 493.091       | 1.643  |
| 3     | 2118.505      | 7.061  | 42    | 491.443       | 1.638  |
| 4     | 2049.005      | 6.829  | 43    | 486.223       | 1.620  |
| 5     | 2045.984      | 6.819  | 44    | 482.652       | 1.609  |
| 6     | 2037.468      | 6.790  | 45    | 477.982       | 1.593  |
| 7     | 1600.691      | 5.335  | 46    | 472.488       | 1.575  |
| 8     | 1596.571      | 5.321  | 47    | 467.269       | 1.557  |
| 9     | 1127.654      | 3.758  | 48    | 465.071       | 1.550  |
| 10    | 1117.215      | 3.723  | 49    | 462.050       | 1.540  |
| 11    | 1108.424      | 3.694  | 50    | 454.083       | 1.513  |
| 12    | 804.329       | 2.681  | 51    | 450.237       | 1.501  |
| 13    | 801.856       | 2.672  | 52    | 446.666       | 1.489  |
| 14    | 796.912       | 2.656  | 53    | 441.722       | 1.472  |
| 15    | 789.495       | 2.631  | 54    | 438.150       | 1.460  |
| 16    | 782.078       | 2.607  | 55    | 433.755       | 1.446  |
| 17    | 676.867       | 2.256  | 56    | 428.811       | 1.429  |
| 18    | 668.900       | 2.229  | 57    | 425.789       | 1.419  |
| 19    | 660.934       | 2.203  | 58    | 421.119       | 1.404  |
| 20    | 629.069       | 2.097  | 59    | 415.899       | 1.386  |
| 21    | 625.223       | 2.084  | 60    | 410.405       | 1.368  |
| 22    | 620.278       | 2.067  | 61    | 404.911       | 1.349  |
| 23    | 615.883       | 2.053  | 62    | 399.143       | 1.330  |
| 24    | 612.037       | 2.040  | 63    | 393.649       | 1.312  |
| 25    | 610.389       | 2.034  | 64    | 378.540       | 1.262  |
| 26    | 607.916       | 2.026  | 65    | 373.046       | 1.243  |
| 27    | 602.972       | 2.010  | 66    | 215.916       | 0.720  |
| 28    | 598.302       | 1.994  | 67    | 203.829       | 0.679  |
| 29    | 593.083       | 1.977  |       |               |        |
| 30    | 565.887       | 1.886  |       |               |        |
| 31    | 555.174       | 1.850  |       |               |        |
| 32    | 545.010       | 1.816  |       |               |        |
| 33    | 531.824       | 1.772  |       |               |        |
| 34    | 527.154       | 1.757  |       |               |        |
| 35    | 523.583       | 1.745  |       |               |        |
| 36    | 514.518       | 1.715  |       |               |        |
| 37    | 506.277       | 1.687  |       |               |        |
| 38    | 502.705       | 1.675  |       |               |        |
| 39    | 500.783       | 1.669  |       |               |        |

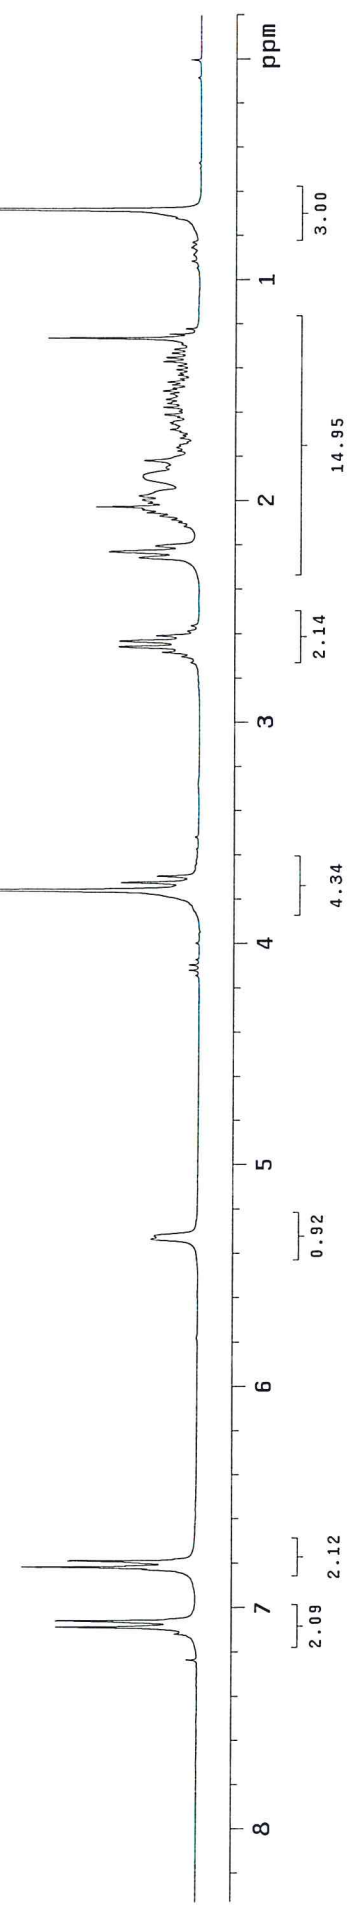

1146

| INDEX | FREQUENCY | PPM     | HEIGHT |
|-------|-----------|---------|--------|
| 1     | 11905.465 | 157.799 | 4.6    |
| 2     | 10307.918 | 136.625 | 11.0   |
| 3     | 10155.607 | 134.606 | 7.2    |
| 4     | 9755.934  | 129.308 | 36.7   |
| 5     | 9098.593  | 120.596 | 16.4   |
| 6     | 8599.288  | 113.978 | 4.8    |
| 7     | 8586.690  | 113.811 | 36.5   |
| 8     | 6176.055  | 81.860  | 17.8   |
| 9     | 5857.691  | 77.640  | 6.3    |
| 10    | 5825.626  | 77.215  | 6.6    |
| 11    | 5793.560  | 76.790  | 5.8    |
| 12    | 4174.255  | 55.327  | 15.8   |
| 13    | 3140.144  | 41.621  | 10.8   |
| 14    | 3110.369  | 41.226  | 17.7   |
| 15    | 3005.011  | 39.829  | 16.2   |
| 16    | 2891.637  | 38.327  | 16.7   |
| 17    | 2552.659  | 33.834  | 19.1   |
| 18    | 2390.042  | 31.678  | 20.6   |
| 19    | 2323.620  | 30.798  | 19.5   |
| 20    | 2217.117  | 29.386  | 4.7    |
| 21    | 1937.690  | 25.683  | 22.2   |
| 22    | 765.010   | 10.140  | 17.4   |

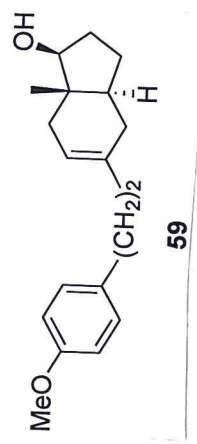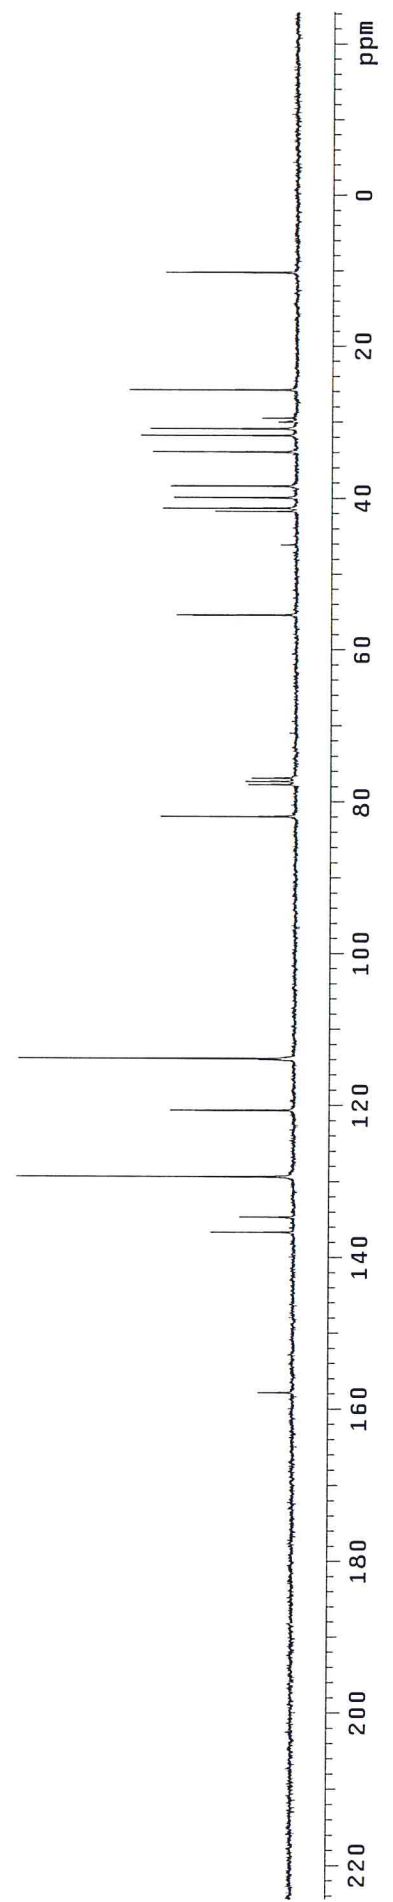

Supplement: NIHMS819451-supplement-Supplementary__2.pdf [file NIHMS819451-supplement-Supplementary__2.pdf]
