# Supplementary material
Source: PubMed Central journal article supplement (PMC5525543)

## Electronic Supplementary Information

### Structure–activity studies of non-steroid analogues structurally-related to neuroprotective estrogens<sup>†</sup>

Mingxing Qian,<sup>a</sup> Elizabeth B. Engler-Chiurazzi,<sup>b</sup> Sara E. Lewis,<sup>b</sup> Nigam P. Rath,<sup>c</sup>

James W. Simpkins,<sup>b</sup> and Douglas F. Covey<sup>\*,a,d,e</sup>

<sup>a</sup>*Department of Developmental Biology, Campus Box 8103, Washington University in St. Louis, School of Medicine, 660 S. Euclid Ave., St. Louis, MO, 63110, USA. Email: [dcovey@wustl.edu](mailto:dcovey@wustl.edu); Fax: +1 314 362 7058; Tele: +1 314-362 1726*

<sup>b</sup>*Center for Basic and Translational Stroke Research, West Virginia University, Morgantown, WV 26506, USA*

<sup>c</sup>*Department of Chemistry and Biochemistry and Center for Nanoscience, University of Missouri–St. Louis, St. Louis, MO, 63121, USA*

<sup>d</sup>*Department of Anesthesiology, Washington University School of Medicine, St. Louis, MO, 63110, USA*

<sup>e</sup>*Department of Psychiatry, Washington University School of Medicine, St. Louis MO, 63110.*

Copies of <sup>1</sup>H and <sup>13</sup>C NMR spectra for compounds 1 to 26.

mq2153

PPF15 Sequence: s2pu1

exp1 std1h

SAMPLE DEC. & VT  
 date Jan 20 2010 dfrq 300.050  
 solvent DMSO dn H1  
 file exp dpwr 30  
 ACQUISITION exp dof 0  
 sfrq 300.050 dm dmm nnn  
 tn 1.998 H1 C  
 np 17984 dmf 200  
 sw 4500.5 wfile PROCESSING  
 fb 2600 proc ft  
 bs 16 fn not used  
 tpwr 49  
 pw 7.0 werr  
 di 1.000 wexp  
 tof 0 wbs  
 nt 8 wnt  
 ct 8  
 alock not used  
 gain n  
 il n  
 in n  
 dp y  
 SP DISPLAY -34.5  
 WD 3032.2  
 VS 100  
 SC 0  
 WC 250  
 hzmm 12.13  
 ls 2419.70  
 rfl 771.3  
 rfp 0  
 th 1  
 ins 3.000  
 nm cdc ph

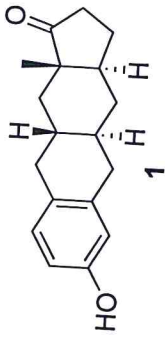

Hg

in DMSO-d6

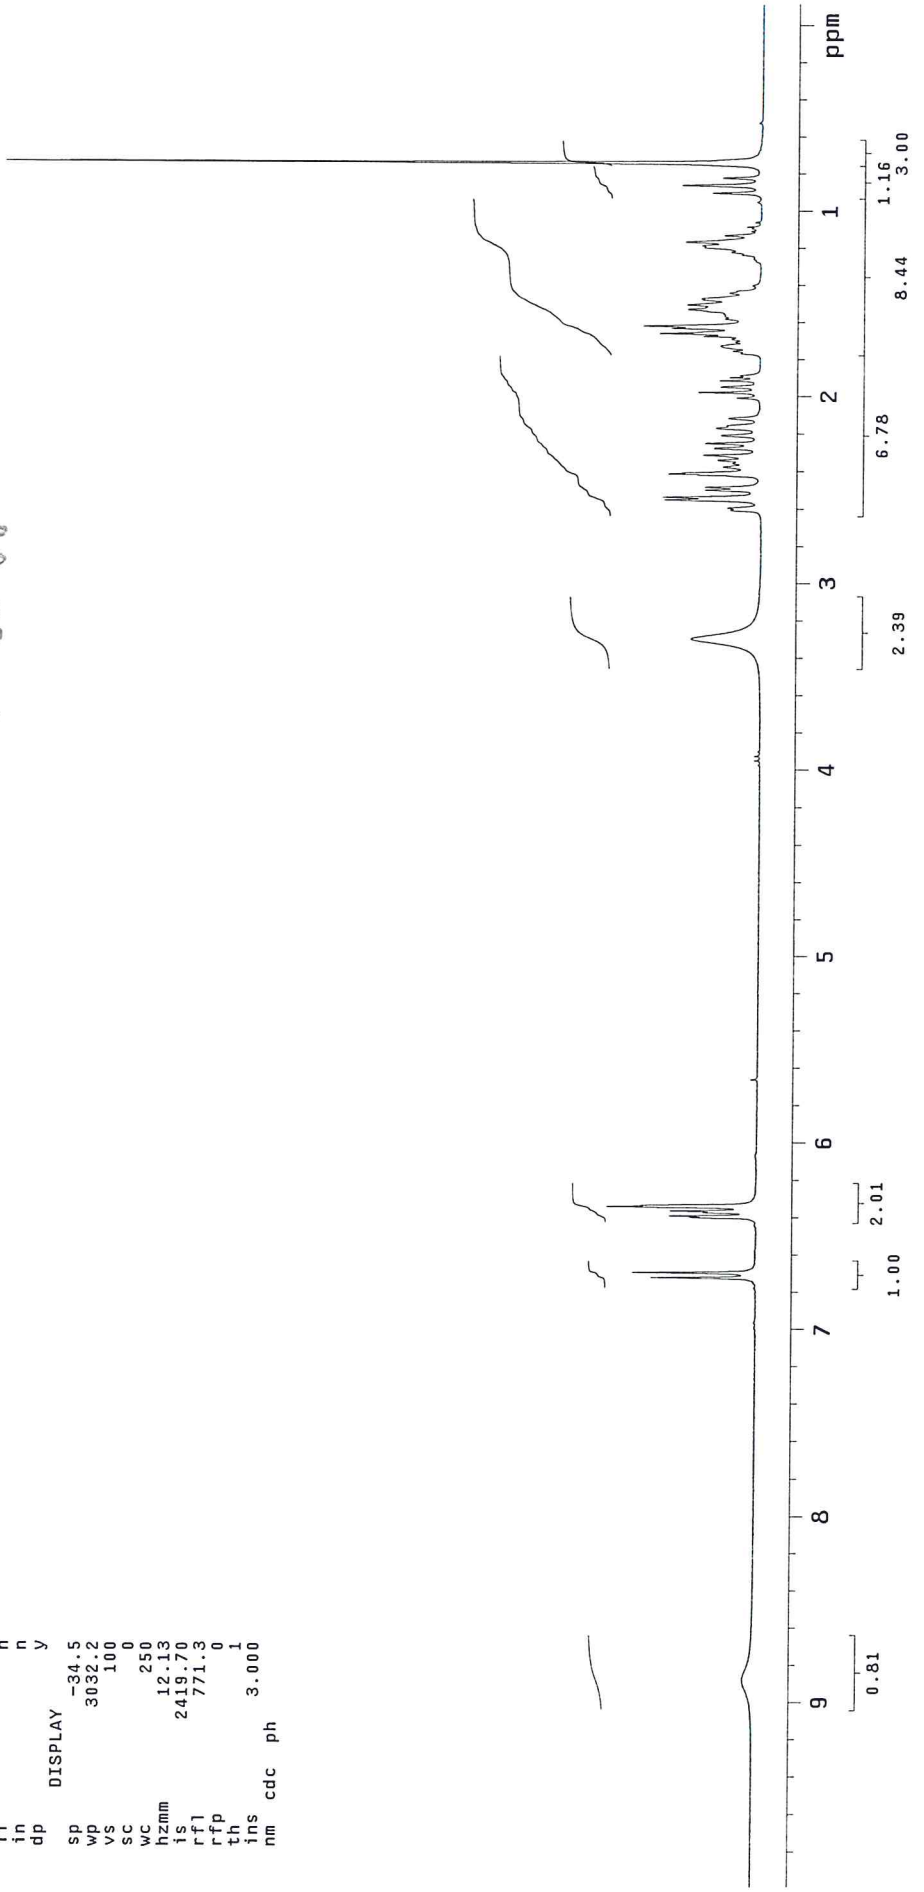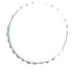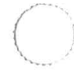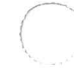

| INDEX | FREQUENCY | PPM     | HEIGHT |
|-------|-----------|---------|--------|
| 1     | 16559.501 | 219.484 | 6.8    |
| 2     | 11692.423 | 154.975 | 9.3    |
| 3     | 10338.803 | 137.033 | 6.7    |
| 4     | 9739.866  | 129.095 | 8.7    |
| 5     | 9528.005  | 126.287 | 8.1    |
| 6     | 8640.479  | 114.523 | 9.1    |
| 7     | 8522.524  | 112.960 | 8.8    |
| 8     | 3595.896  | 47.661  | 7.7    |
| 9     | 3356.550  | 44.489  | 9.8    |
| 10    | 3045.057  | 40.360  | 5.1    |
| 11    | 3024.444  | 40.087  | 15.9   |
| 12    | 3003.830  | 39.814  | 31.2   |
| 13    | 2982.072  | 39.525  | 35.4   |
| 14    | 2961.458  | 39.252  | 32.9   |
| 15    | 2940.845  | 38.979  | 15.6   |
| 16    | 2916.795  | 38.660  | 9.0    |
| 17    | 2772.501  | 36.747  | 8.5    |
| 18    | 2751.887  | 36.474  | 8.7    |
| 19    | 2655.691  | 35.199  | 8.3    |
| 20    | 2575.527  | 34.137  | 10.1   |
| 21    | 2402.603  | 31.845  | 7.6    |
| 22    | 1783.053  | 23.633  | 7.9    |
| 23    | 997.449   | 13.220  | 10.9   |

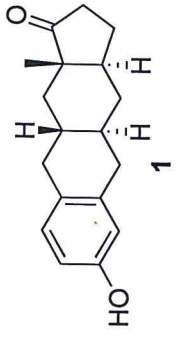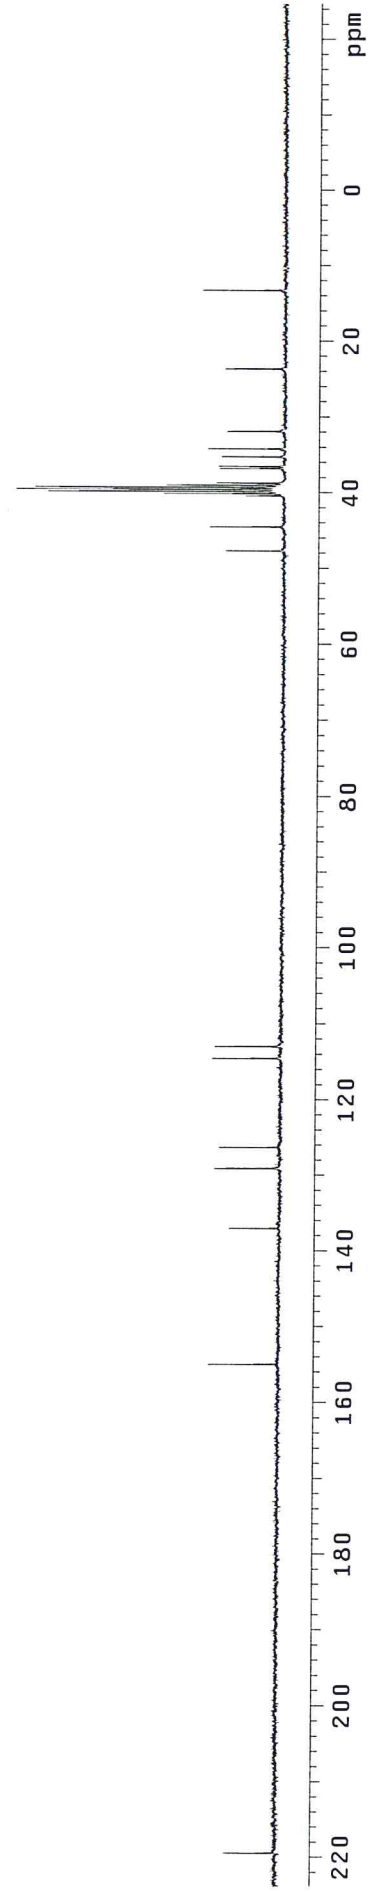

2155

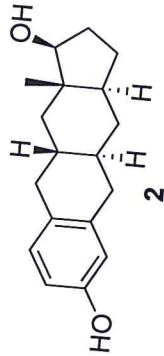

*in DMSo-d6*

| INDEX | FREQUENCY PPM | HEIGHT | INDEX | FREQUENCY PPM | HEIGHT |
|-------|---------------|--------|-------|---------------|--------|
| 1     | 2668.801      | 8.895  | 1.8   | 422.285       | 1.407  |
| 2     | 2657.539      | 8.857  | 22.8  | 418.164       | 1.394  |
| 3     | 2014.185      | 6.713  | 7.3   | 409.923       | 1.366  |
| 4     | 2005.944      | 6.685  | 7.8   | 382.178       | 1.274  |
| 5     | 1917.765      | 6.392  | 6.5   | 374.212       | 1.247  |
| 6     | 1915.293      | 6.383  | 7.1   | 349.489       | 1.165  |
| 7     | 1909.524      | 6.364  | 5.7   | 331.358       | 1.104  |
| 8     | 1907.326      | 6.357  | 7.1   | 324.216       | 1.081  |
| 9     | 1899.085      | 6.329  | 10.8  | 317.074       | 1.057  |
| 10    | 1321.386      | 4.404  | 10.8  | 305.262       | 1.017  |
| 11    | 1316.441      | 4.387  | 10.1  | 293.449       | 0.978  |
| 12    | 1029.927      | 3.433  | 2.6   | 282.461       | 0.941  |
| 13    | 1022.235      | 3.407  | 4.5   | 270.924       | 0.903  |
| 14    | 1016.741      | 3.389  | 4.2   | 253.068       | 0.843  |
| 15    | 1017.290      | 3.390  | 4.2   | 223.126       | 0.744  |
| 16    | 1008.774      | 3.362  | 2.8   | 211.588       | 0.705  |
| 17    | 991.194       | 3.303  | 42.1  | 199.226       | 0.664  |
| 18    | 769.509       | 2.565  | 3.2   | 187.139       | 0.624  |
| 19    | 765.113       | 2.550  | 3.5   | 174.228       | 0.581  |
| 20    | 753.027       | 2.510  | 6.8   | 157.197       | 0.524  |
| 21    | 738.742       | 2.462  | 4.9   | 110.772       | 0.369  |
| 22    | 734.896       | 2.449  | 4.6   |               |        |
| 23    | 725.007       | 2.416  | 3.2   |               |        |
| 24    | 723.359       | 2.411  | 3.7   |               |        |
| 25    | 721.436       | 2.404  | 2.9   |               |        |
| 26    | 704.404       | 2.348  | 3.4   |               |        |
| 27    | 692.592       | 2.308  | 3.7   |               |        |
| 28    | 676.110       | 2.253  | 2.4   |               |        |
| 29    | 651.661       | 2.172  | 3.3   |               |        |
| 30    | 639.849       | 2.132  | 3.9   |               |        |
| 31    | 624.191       | 2.080  | 2.8   |               |        |
| 32    | 567.877       | 1.893  | 5.2   |               |        |
| 33    | 545.626       | 1.818  | 2.1   |               |        |
| 34    | 528.045       | 1.760  | 6.4   |               |        |
| 35    | 524.474       | 1.748  | 6.9   |               |        |
| 36    | 516.233       | 1.720  | 5.7   |               |        |
| 37    | 512.387       | 1.708  | 4.9   |               |        |
| 38    | 450.030       | 1.500  | 4.6   |               |        |
| 39    | 438.492       | 1.461  | 6.3   |               |        |

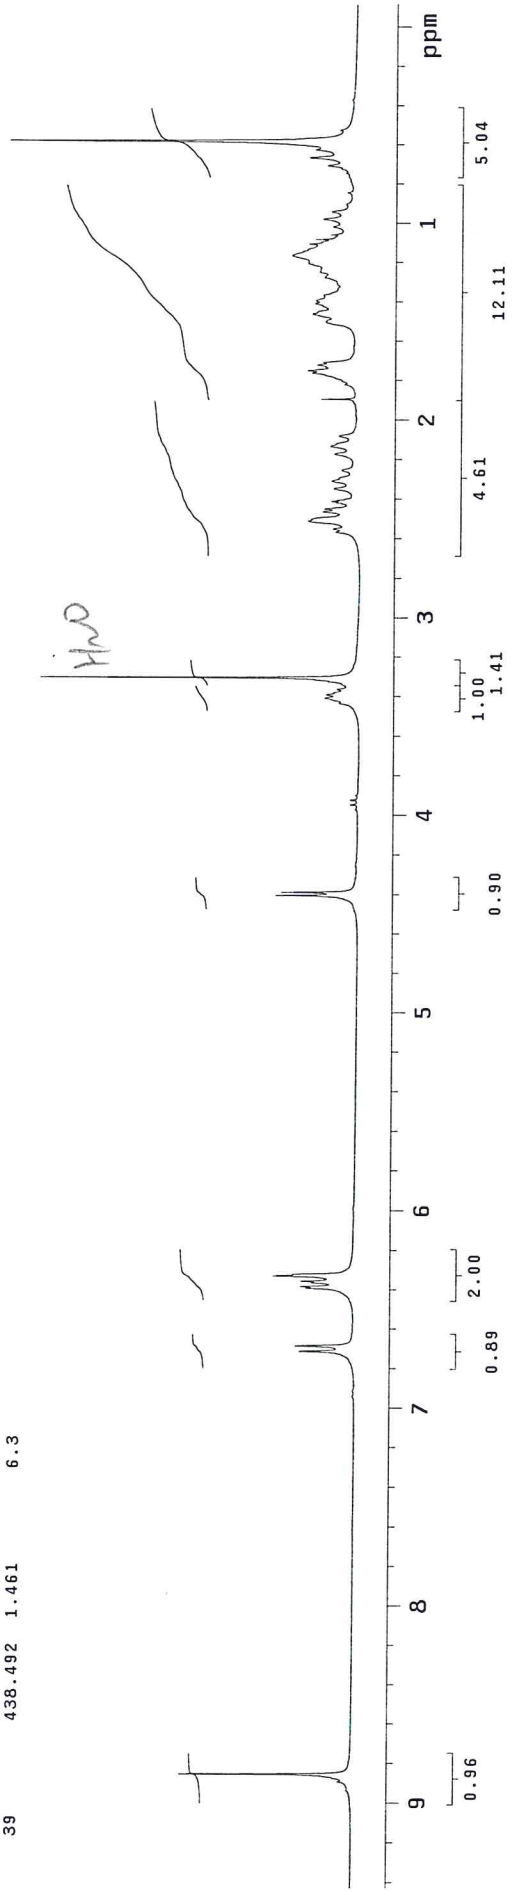

| INDEX | FREQUENCY | PPM     | HEIGHT |
|-------|-----------|---------|--------|
| 1     | 11686.697 | 154.899 | 12.4   |
| 2     | 10350.255 | 137.185 | 11.7   |
| 3     | 9738.721  | 129.080 | 14.3   |
| 4     | 9552.054  | 126.605 | 12.0   |
| 5     | 8641.624  | 114.538 | 13.1   |
| 6     | 8515.653  | 112.869 | 13.2   |
| 7     | 6034.016  | 79.976  | 12.1   |
| 8     | 3339.372  | 44.261  | 12.2   |
| 9     | 3326.775  | 44.094  | 13.8   |
| 10    | 3259.209  | 43.198  | 15.2   |
| 11    | 3043.912  | 40.345  | 5.7    |
| 12    | 3022.153  | 40.056  | 15.6   |
| 13    | 3001.540  | 39.783  | 30.7   |
| 14    | 2980.926  | 39.510  | 37.4   |
| 15    | 2974.055  | 39.419  | 17.6   |
| 16    | 2960.313  | 39.237  | 28.2   |
| 17    | 2938.554  | 38.948  | 13.8   |
| 18    | 2917.941  | 38.675  | 4.7    |
| 19    | 2797.695  | 37.081  | 11.8   |
| 20    | 2777.082  | 36.808  | 11.9   |
| 21    | 2606.448  | 34.547  | 13.1   |
| 22    | 2456.427  | 32.558  | 11.5   |
| 23    | 2242.276  | 29.720  | 12.5   |
| 24    | 1897.572  | 25.151  | 11.5   |
| 25    | 849.719   | 11.262  | 16.8   |

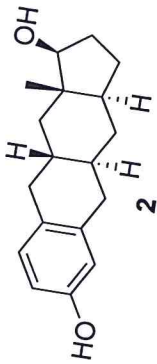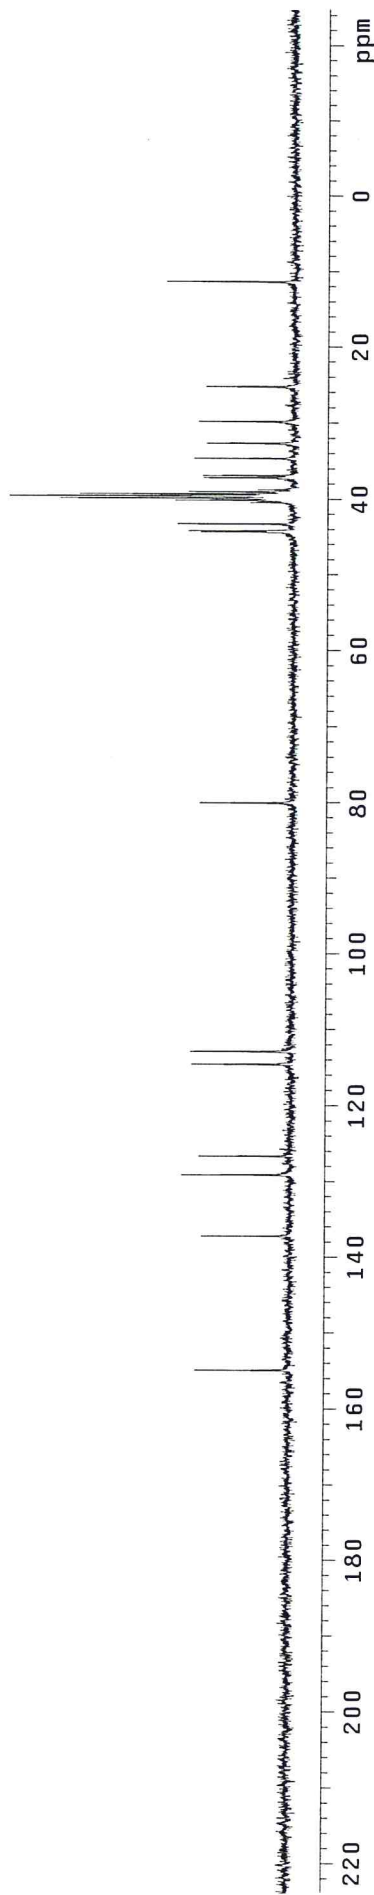

MQZ156

| INDEX | FREQUENCY | PPM   | HEIGHT |
|-------|-----------|-------|--------|
| 1     | 2622.377  | 8.740 | 10.5   |
| 2     | 1974.903  | 6.582 | 8.4    |
| 3     | 1895.514  | 6.317 | 9.5    |
| 4     | 979.656   | 3.265 | 20.3   |
| 5     | 746.983   | 2.490 | 6.3    |
| 6     | 723.633   | 2.412 | 5.9    |
| 7     | 701.657   | 2.338 | 5.8    |
| 8     | 692.317   | 2.307 | 6.3    |
| 9     | 682.153   | 2.273 | 5.4    |
| 10    | 659.353   | 2.197 | 4.1    |
| 11    | 647.815   | 2.159 | 4.0    |
| 12    | 632.432   | 2.108 | 3.0    |
| 13    | 576.942   | 1.923 | 50.0   |
| 14    | 482.719   | 1.609 | 39.8   |
| 15    | 460.194   | 1.534 | 8.9    |
| 16    | 451.129   | 1.504 | 9.0    |
| 17    | 353.609   | 1.179 | 8.7    |
| 18    | 347.840   | 1.159 | 8.7    |
| 19    | 324.765   | 1.082 | 3.7    |
| 20    | 317.623   | 1.059 | 2.2    |
| 21    | 270.374   | 0.901 | 4.6    |
| 22    | 258.287   | 0.861 | 6.1    |
| 23    | 220.104   | 0.734 | 26.3   |

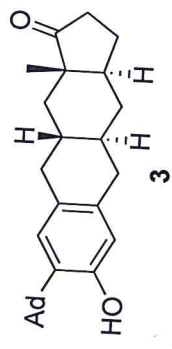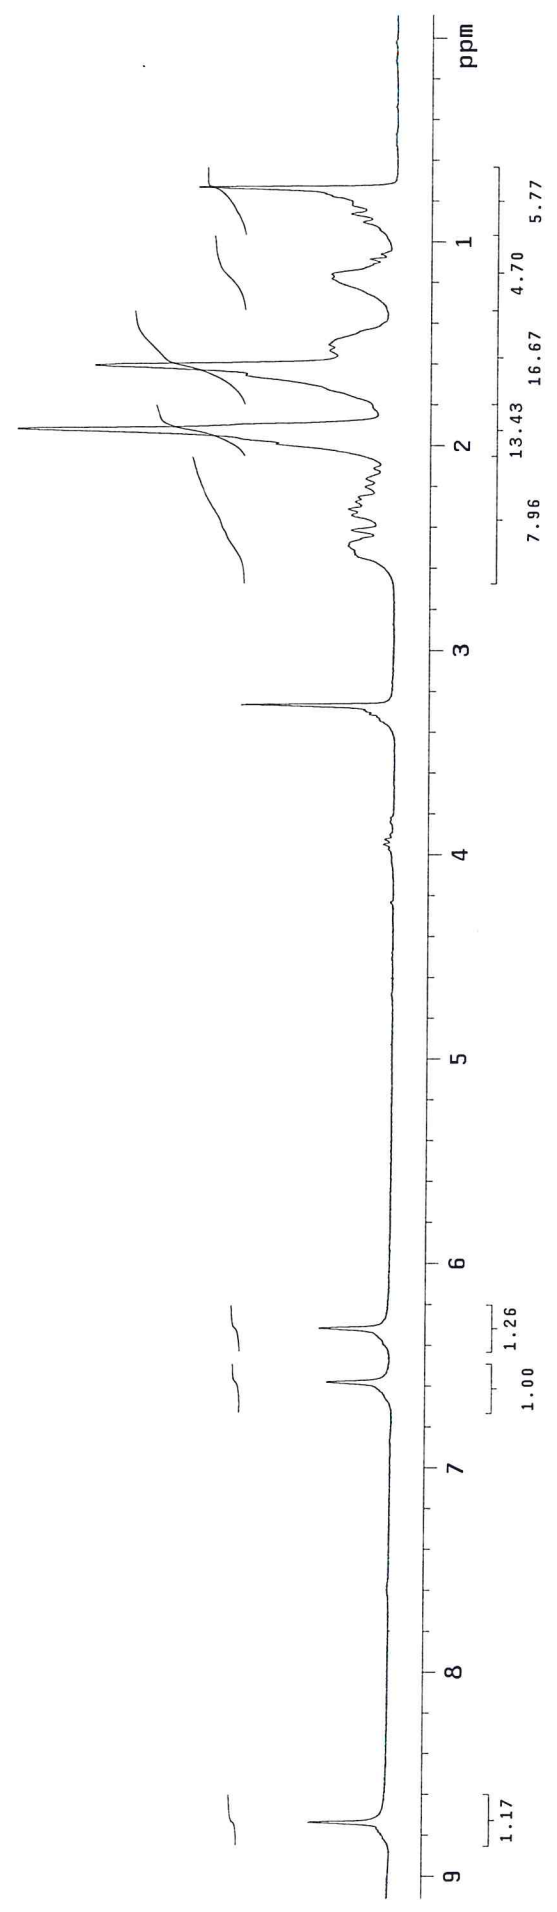

| INDEX | FREQUENCY | PPM     | HEIGHT |
|-------|-----------|---------|--------|
| 1     | 16552.630 | 219.393 | 6.5    |
| 2     | 11589.356 | 153.608 | 6.9    |
| 3     | 10094.876 | 133.800 | 7.0    |
| 4     | 10045.633 | 133.148 | 6.4    |
| 5     | 9497.085  | 125.877 | 7.3    |
| 6     | 9487.923  | 125.755 | 7.3    |
| 7     | 8724.078  | 115.631 | 7.1    |
| 8     | 3592.460  | 47.615  | 8.7    |
| 9     | 3356.550  | 44.489  | 6.6    |
| 10    | 3043.912  | 40.345  | 6.8    |
| 11    | 3022.153  | 40.056  | 40.5   |
| 12    | 3001.540  | 39.783  | 39.4   |
| 13    | 2980.926  | 39.510  | 46.8   |
| 14    | 2959.168  | 39.222  | 38.8   |
| 15    | 2938.554  | 38.948  | 19.8   |
| 16    | 2917.941  | 38.675  | 10.6   |
| 17    | 2766.775  | 36.672  | 19.1   |
| 18    | 2718.677  | 36.034  | 6.4    |
| 19    | 2694.628  | 35.715  | 8.9    |
| 20    | 2652.256  | 35.154  | 6.1    |
| 21    | 2581.253  | 34.213  | 6.7    |
| 22    | 2406.039  | 31.890  | 6.0    |
| 23    | 2143.789  | 28.414  | 25.1   |
| 24    | 1780.762  | 23.603  | 6.3    |
| 25    | 994.014   | 13.175  | 9.7    |

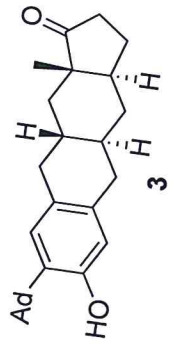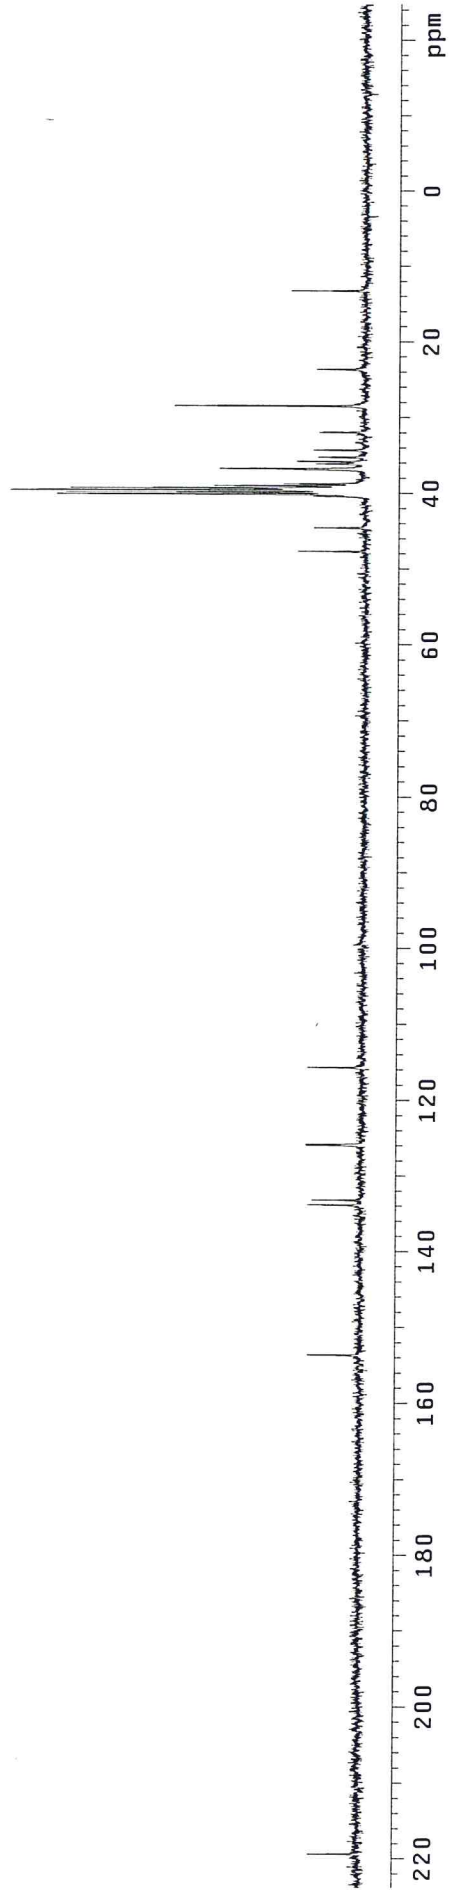

MQ2157

| INDEX | FREQUENCY | PPM   | HEIGHT |
|-------|-----------|-------|--------|
| 1     | 2067.090  | 6.889 | 8.3    |
| 2     | 1915.729  | 6.385 | 8.6    |
| 3     | 1551.748  | 5.172 | 1.7    |
| 4     | 1124.586  | 3.748 | 5.1    |
| 5     | 817.469   | 2.724 | 7.1    |
| 6     | 801.811   | 2.672 | 8.2    |
| 7     | 754.013   | 2.513 | 4.6    |
| 8     | 742.200   | 2.474 | 5.2    |
| 9     | 724.619   | 2.415 | 5.8    |
| 10    | 710.610   | 2.368 | 5.7    |
| 11    | 696.050   | 2.320 | 4.5    |
| 12    | 634.517   | 2.115 | 50.0   |
| 13    | 591.389   | 1.971 | 7.5    |
| 14    | 582.324   | 1.941 | 7.1    |
| 15    | 534.251   | 1.781 | 40.8   |
| 16    | 505.956   | 1.686 | 12.9   |
| 17    | 417.777   | 1.392 | 12.5   |
| 18    | 402.943   | 1.343 | 10.7   |
| 19    | 387.285   | 1.291 | 9.7    |
| 20    | 353.222   | 1.177 | 5.2    |
| 21    | 341.410   | 1.138 | 4.2    |
| 22    | 274.107   | 0.914 | 10.9   |
| 23    | 263.119   | 0.877 | 8.7    |
| 24    | 240.868   | 0.803 | 27.7   |

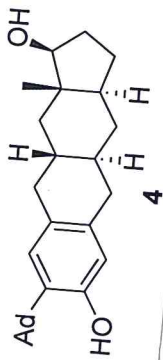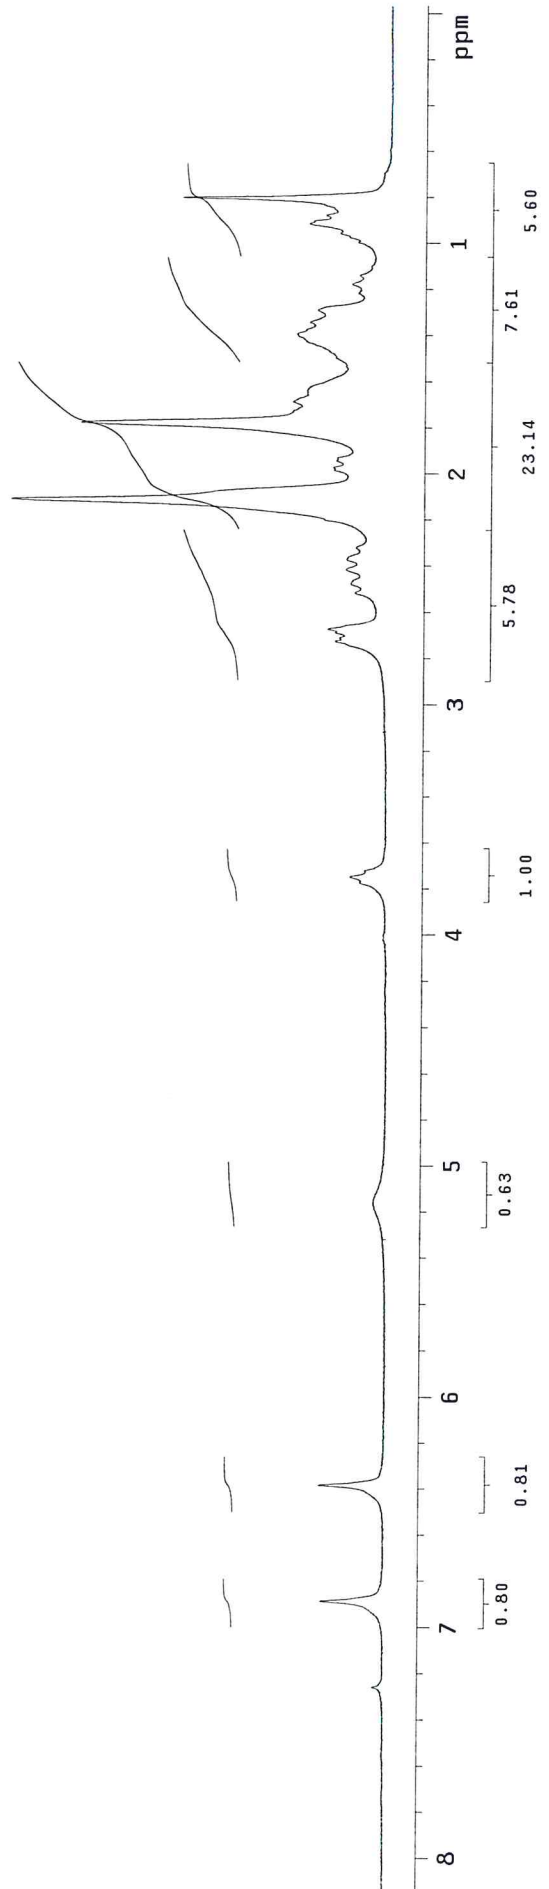



| INDEX | FREQUENCY | PPM     | HEIGHT |
|-------|-----------|---------|--------|
| 1     | 11494.166 | 152.348 | 5.0    |
| 2     | 10180.628 | 134.937 | 4.4    |
| 3     | 10118.787 | 134.118 | 4.3    |
| 4     | 9688.194  | 128.411 | 4.7    |
| 5     | 9580.546  | 126.984 | 6.8    |
| 6     | 8772.038  | 116.268 | 7.7    |
| 7     | 6179.317  | 81.903  | 7.5    |
| 8     | 5841.485  | 77.425  | 17.4   |
| 9     | 5809.419  | 77.000  | 18.0   |
| 10    | 5777.354  | 76.575  | 17.3   |
| 11    | 3363.283  | 44.578  | 8.3    |
| 12    | 3341.524  | 44.290  | 7.2    |
| 13    | 3286.555  | 43.561  | 7.1    |
| 14    | 3070.113  | 40.692  | 22.7   |
| 15    | 2995.676  | 39.706  | 8.2    |
| 16    | 2825.042  | 37.444  | 7.3    |
| 17    | 2796.412  | 37.065  | 22.3   |
| 18    | 2768.927  | 36.700  | 7.9    |
| 19    | 2738.007  | 36.290  | 6.2    |
| 20    | 2630.358  | 34.864  | 7.4    |
| 21    | 2475.757  | 32.815  | 7.3    |
| 22    | 2286.800  | 30.310  | 7.5    |
| 23    | 2190.604  | 29.035  | 26.0   |
| 24    | 1914.612  | 25.377  | 7.5    |
| 25    | 832.403   | 11.033  | 8.6    |

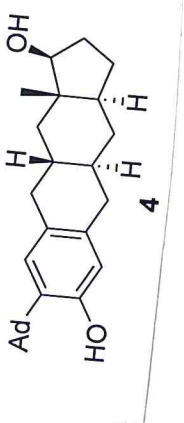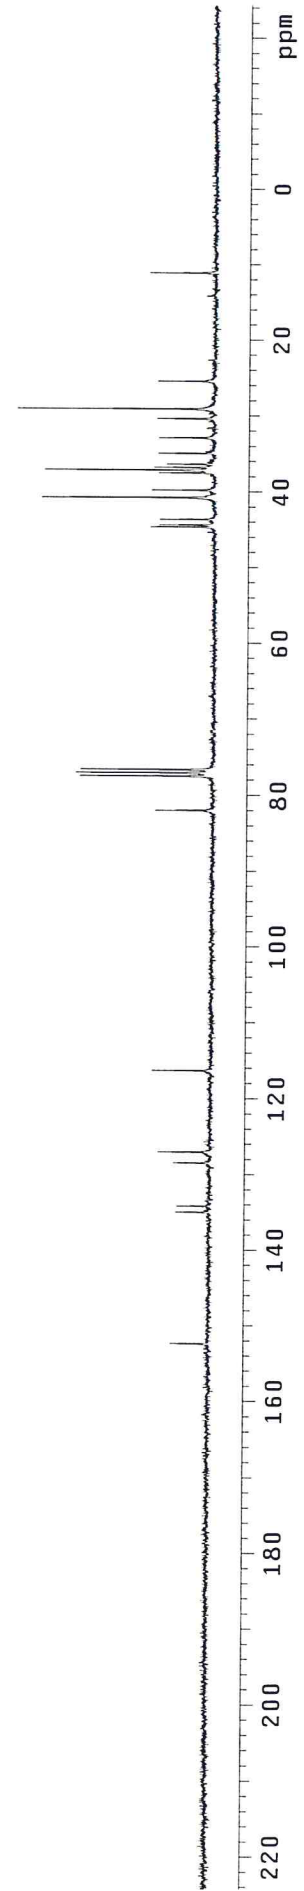

mq1261

Pulse Sequence: s2pu1

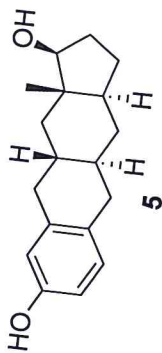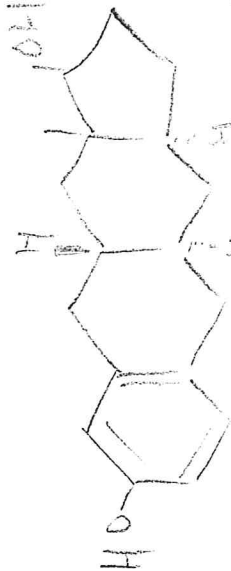

*in acetone-d6*

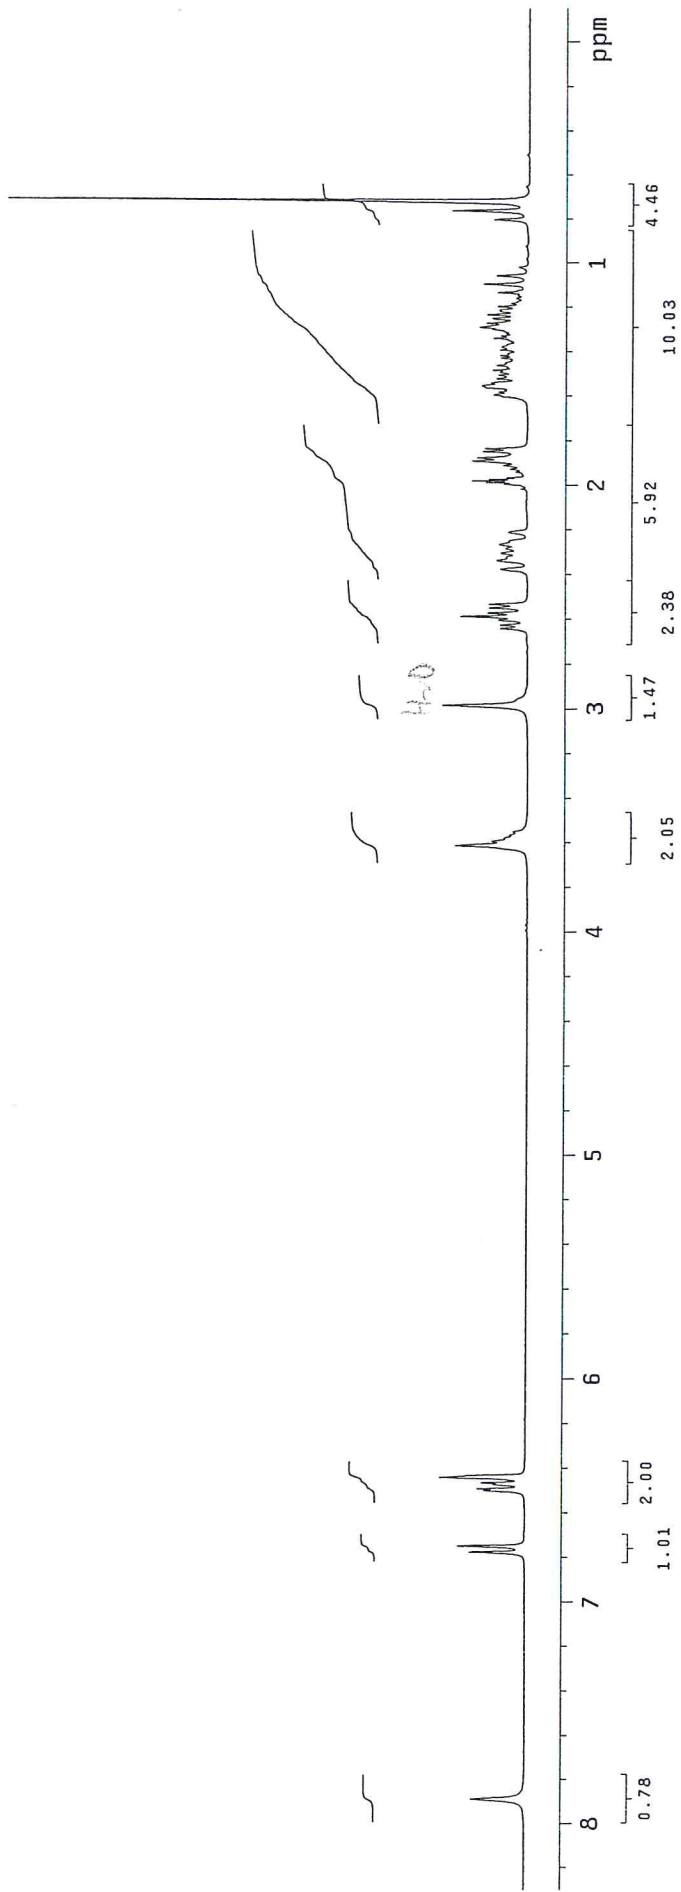

6

Q

O

mq1261C

Pulse Sequence: s2pu1

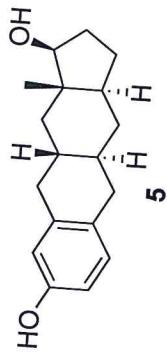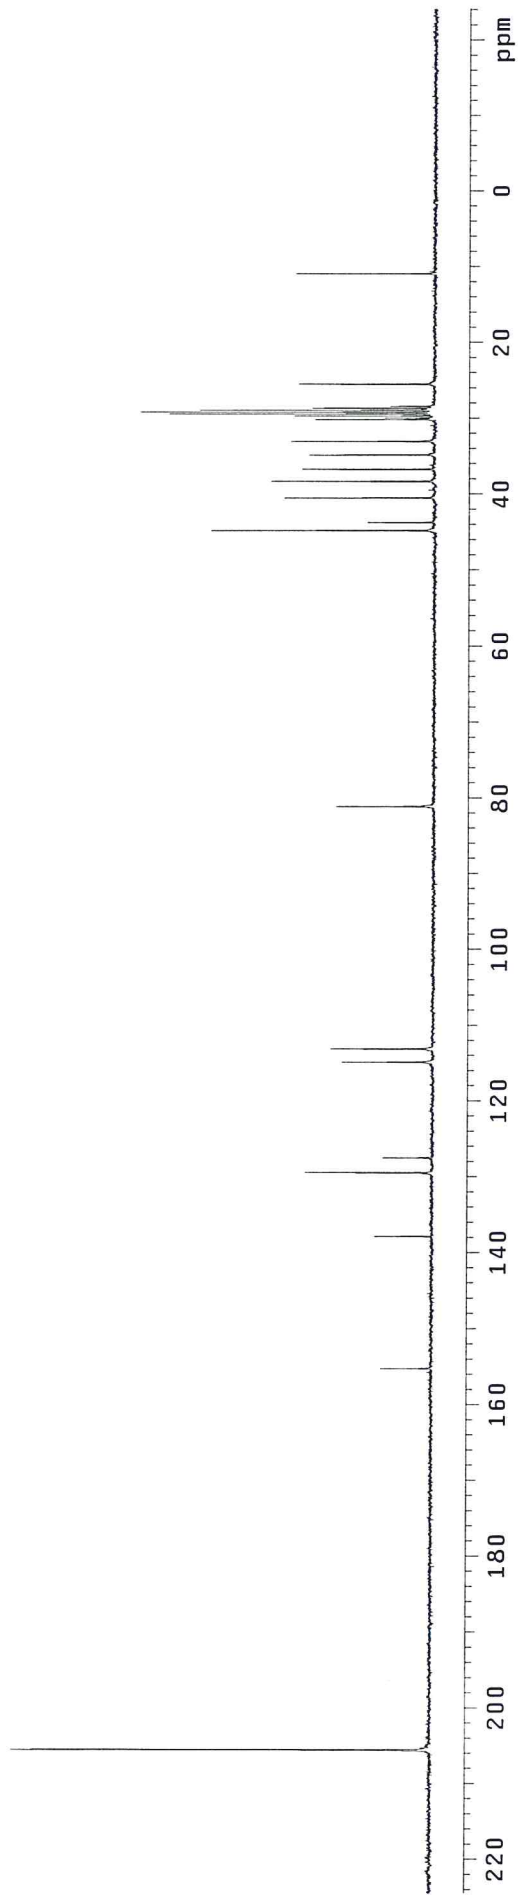

1262

| INDEX | FREQUENCY PPM | HEIGHT | INDEX | FREQUENCY PPM | HEIGHT |
|-------|---------------|--------|-------|---------------|--------|
| 1     | 2611.938      | 8.705  | 40    | 309.107       | 1.030  |
| 2     | 1975.178      | 6.583  | 41    | 297.845       | 0.993  |
| 3     | 1891.943      | 6.305  | 42    | 286.307       | 0.954  |
| 4     | 1317.540      | 4.391  | 43    | 211.863       | 0.706  |
| 5     | 1312.870      | 4.376  | 44    | 200.050       | 0.667  |
| 6     | 1023.883      | 3.412  | 45    | 187.964       | 0.626  |
| 7     | 1019.213      | 3.397  | 46    | 174.778       | 0.582  |
| 8     | 1010.697      | 3.368  |       |               |        |
| 9     | 979.107       | 3.263  |       |               |        |
| 10    | 762.092       | 2.540  |       |               |        |
| 11    | 757.696       | 2.525  |       |               |        |
| 12    | 745.884       | 2.486  |       |               |        |
| 13    | 741.764       | 2.472  |       |               |        |
| 14    | 725.556       | 2.418  |       |               |        |
| 15    | 723.908       | 2.413  |       |               |        |
| 16    | 721.985       | 2.406  |       |               |        |
| 17    | 686.549       | 2.288  |       |               |        |
| 18    | 674.736       | 2.249  |       |               |        |
| 19    | 653.584       | 2.178  |       |               |        |
| 20    | 642.047       | 2.140  |       |               |        |
| 21    | 625.839       | 2.086  |       |               |        |
| 22    | 578.041       | 1.926  |       |               |        |
| 23    | 569.251       | 1.897  |       |               |        |
| 24    | 531.616       | 1.772  |       |               |        |
| 25    | 527.771       | 1.759  |       |               |        |
| 26    | 519.255       | 1.731  |       |               |        |
| 27    | 515.409       | 1.718  |       |               |        |
| 28    | 482.719       | 1.609  |       |               |        |
| 29    | 452.777       | 1.509  |       |               |        |
| 30    | 440.690       | 1.469  |       |               |        |
| 31    | 420.637       | 1.402  |       |               |        |
| 32    | 382.453       | 1.275  |       |               |        |
| 33    | 361.576       | 1.205  |       |               |        |
| 34    | 353.334       | 1.178  |       |               |        |
| 35    | 343.445       | 1.145  |       |               |        |
| 36    | 340.973       | 1.136  |       |               |        |
| 37    | 332.732       | 1.109  |       |               |        |
| 38    | 325.590       | 1.085  |       |               |        |
| 39    | 318.447       | 1.061  |       |               |        |

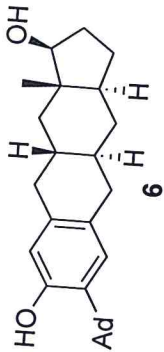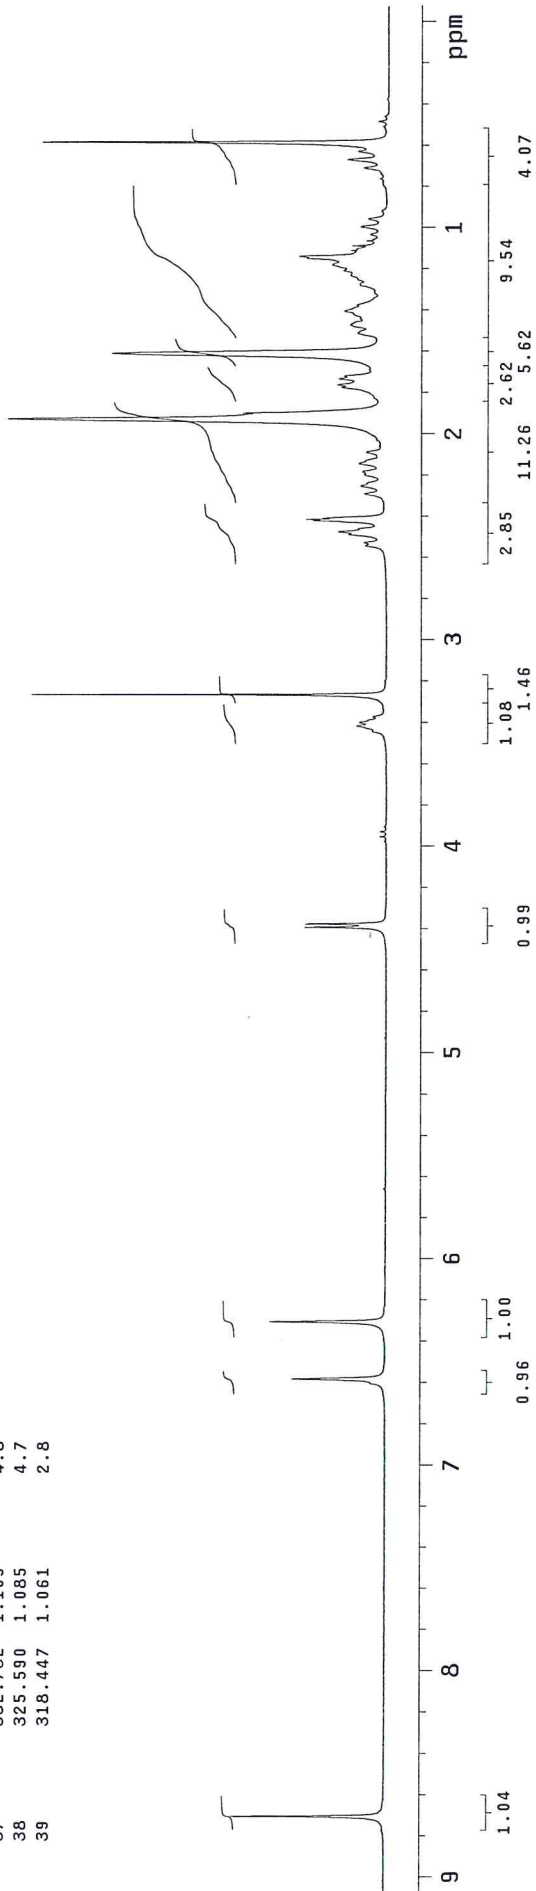

1262

| INDEX | FREQUENCY | PPM     | HEIGHT |
|-------|-----------|---------|--------|
| 1     | 11628.582 | 154.128 | 8.8    |
| 2     | 10168.459 | 134.776 | 6.8    |
| 3     | 10092.876 | 133.774 | 5.4    |
| 4     | 9553.489  | 126.625 | 9.0    |
| 5     | 9548.909  | 126.564 | 7.1    |
| 6     | 8775.902  | 116.318 | 6.9    |
| 7     | 6080.114  | 80.588  | 8.2    |
| 8     | 3386.616  | 44.887  | 6.7    |
| 9     | 3378.599  | 44.781  | 9.0    |
| 10    | 3307.597  | 43.840  | 11.9   |
| 11    | 3092.301  | 40.986  | 6.7    |
| 12    | 3071.687  | 40.713  | 41.2   |
| 13    | 3060.235  | 40.561  | 13.1   |
| 14    | 3051.073  | 40.440  | 48.7   |
| 15    | 3030.460  | 40.167  | 54.3   |
| 16    | 3008.701  | 39.878  | 48.3   |
| 17    | 2988.088  | 39.605  | 24.9   |
| 18    | 2967.474  | 39.332  | 8.2    |
| 19    | 2840.358  | 37.647  | 7.0    |
| 20    | 2815.163  | 37.313  | 17.2   |
| 21    | 2801.421  | 37.131  | 7.7    |
| 22    | 2743.016  | 36.357  | 9.9    |
| 23    | 2633.077  | 34.900  | 7.8    |
| 24    | 2512.832  | 33.306  | 6.3    |
| 25    | 2289.519  | 30.346  | 6.1    |
| 26    | 2192.177  | 29.056  | 26.2   |
| 27    | 1943.670  | 25.762  | 6.7    |
| 28    | 894.672   | 11.858  | 9.9    |

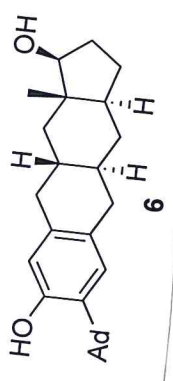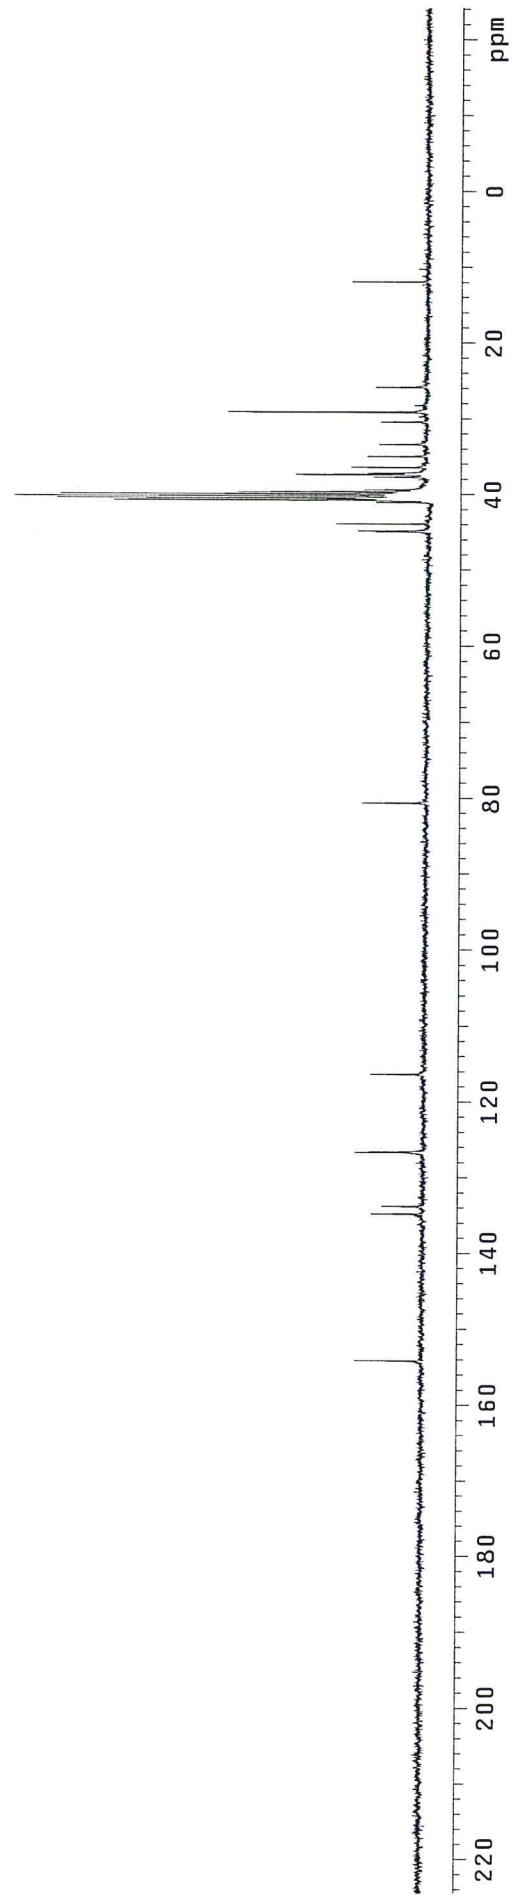

mq2072

Pulse Sequence: s2pu1

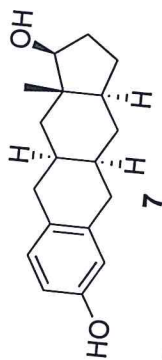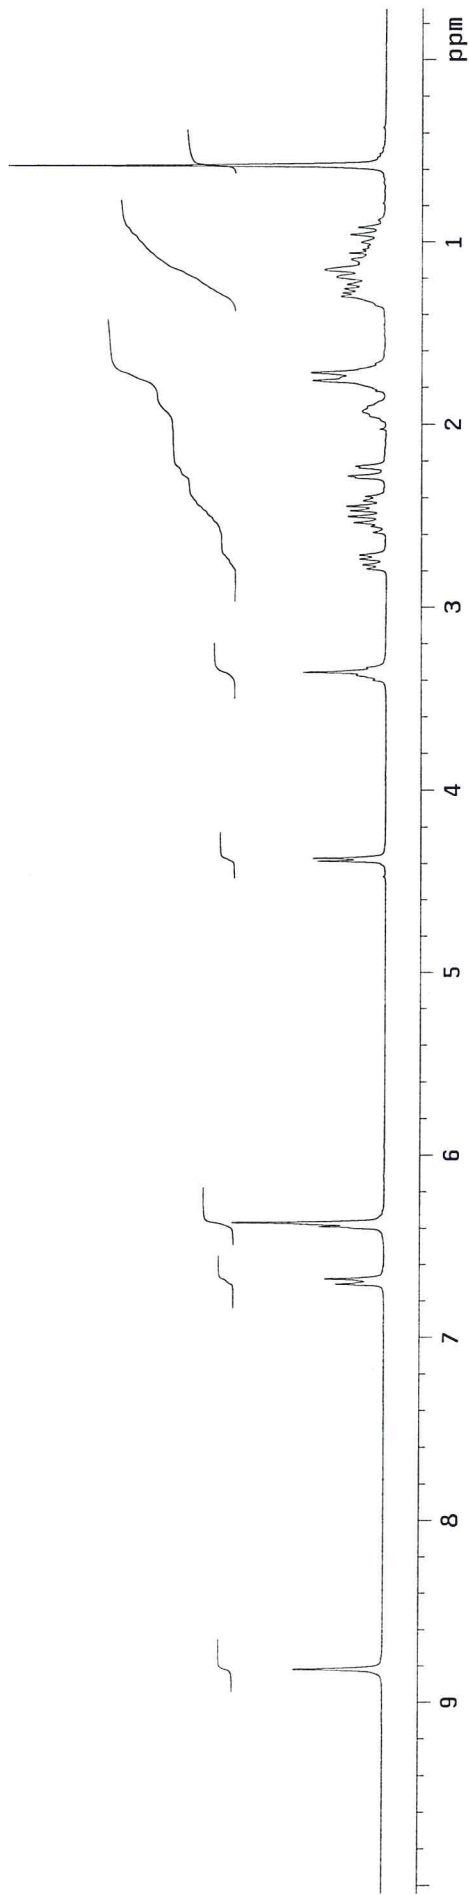

mq2072C

Pulse Sequence: s2pu1

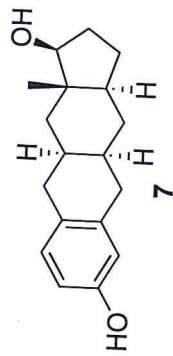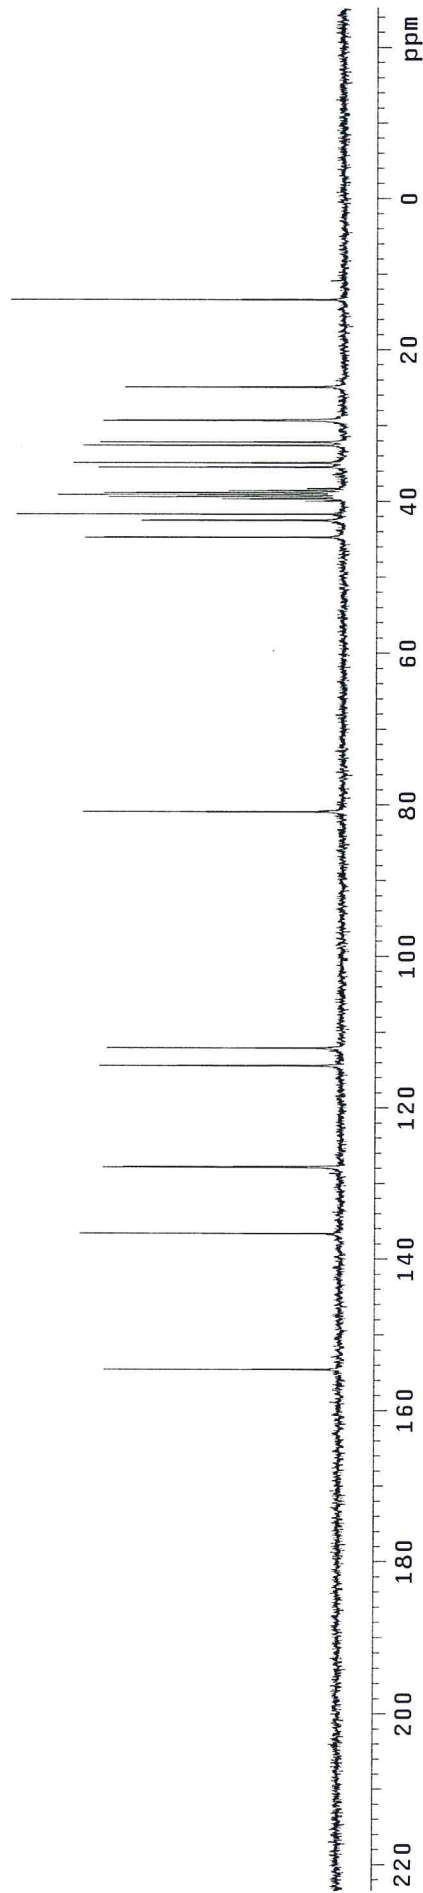

MQ2075

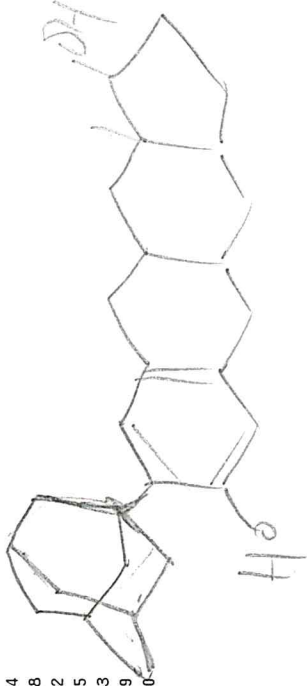

acetone-d6

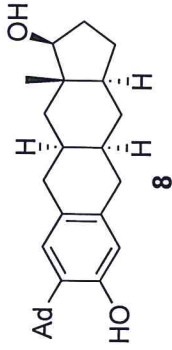

| INDEX | FREQUENCY | PPM   | HEIGHT | INDEX | FREQUENCY | PPM   | HEIGHT |
|-------|-----------|-------|--------|-------|-----------|-------|--------|
| 1     | 2322.206  | 7.739 | 7.2    | 40    | 400.113   | 1.333 | 4.1    |
| 2     | 2015.638  | 6.718 | 13.2   | 41    | 396.267   | 1.321 | 3.3    |
| 3     | 1929.381  | 6.430 | 13.6   | 42    | 390.773   | 1.302 | 4.2    |
| 4     | 1061.047  | 3.536 | 4.3    | 43    | 388.300   | 1.294 | 5.1    |
| 5     | 1055.003  | 3.516 | 7.2    | 44    | 378.961   | 1.263 | 5.2    |
| 6     | 858.316   | 2.861 | 3.7    | 45    | 370.719   | 1.236 | 9.8    |
| 7     | 850.899   | 2.836 | 10.1   | 46    | 367.972   | 1.226 | 7.5    |
| 8     | 842.384   | 2.807 | 5.6    | 47    | 361.105   | 1.203 | 9.4    |
| 9     | 835.516   | 2.785 | 4.5    | 48    | 355.886   | 1.186 | 4.8    |
| 10    | 830.846   | 2.769 | 3.2    | 49    | 349.018   | 1.163 | 6.2    |
| 11    | 820.133   | 2.733 | 2.8    | 50    | 336.656   | 1.122 | 3.5    |
| 12    | 814.639   | 2.715 | 3.8    | 51    | 242.708   | 0.809 | 4.3    |
| 13    | 803.925   | 2.679 | 3.9    | 52    | 235.566   | 0.785 | 3.9    |
| 14    | 755.303   | 2.517 | 3.8    | 53    | 226.501   | 0.755 | 50.0   |
| 15    | 748.435   | 2.494 | 4.5    |       |           |       |        |
| 16    | 739.370   | 2.464 | 2.8    |       |           |       |        |
| 17    | 732.228   | 2.440 | 2.9    |       |           |       |        |
| 18    | 701.461   | 2.338 | 4.2    |       |           |       |        |
| 19    | 698.439   | 2.328 | 4.5    |       |           |       |        |
| 20    | 685.254   | 2.284 | 3.8    |       |           |       |        |
| 21    | 682.232   | 2.274 | 4.0    |       |           |       |        |
| 22    | 625.094   | 2.083 | 38.3   |       |           |       |        |
| 23    | 622.622   | 2.075 | 46.1   |       |           |       |        |
| 24    | 606.139   | 2.020 | 5.4    |       |           |       |        |
| 25    | 598.722   | 1.995 | 6.1    |       |           |       |        |
| 26    | 596.250   | 1.987 | 9.0    |       |           |       |        |
| 27    | 594.053   | 1.980 | 13.7   |       |           |       |        |
| 28    | 591.855   | 1.973 | 15.2   |       |           |       |        |
| 29    | 589.383   | 1.964 | 16.2   |       |           |       |        |
| 30    | 567.681   | 1.892 | 8.3    |       |           |       |        |
| 31    | 562.462   | 1.875 | 5.4    |       |           |       |        |
| 32    | 555.319   | 1.851 | 10.3   |       |           |       |        |
| 33    | 549.276   | 1.831 | 5.5    |       |           |       |        |
| 34    | 540.760   | 1.802 | 2.6    |       |           |       |        |
| 35    | 512.191   | 1.707 | 40.3   |       |           |       |        |
| 36    | 425.111   | 1.417 | 6.4    |       |           |       |        |
| 37    | 419.067   | 1.397 | 7.7    |       |           |       |        |
| 38    | 411.650   | 1.372 | 7.3    |       |           |       |        |
| 39    | 405.881   | 1.353 | 6.1    |       |           |       |        |

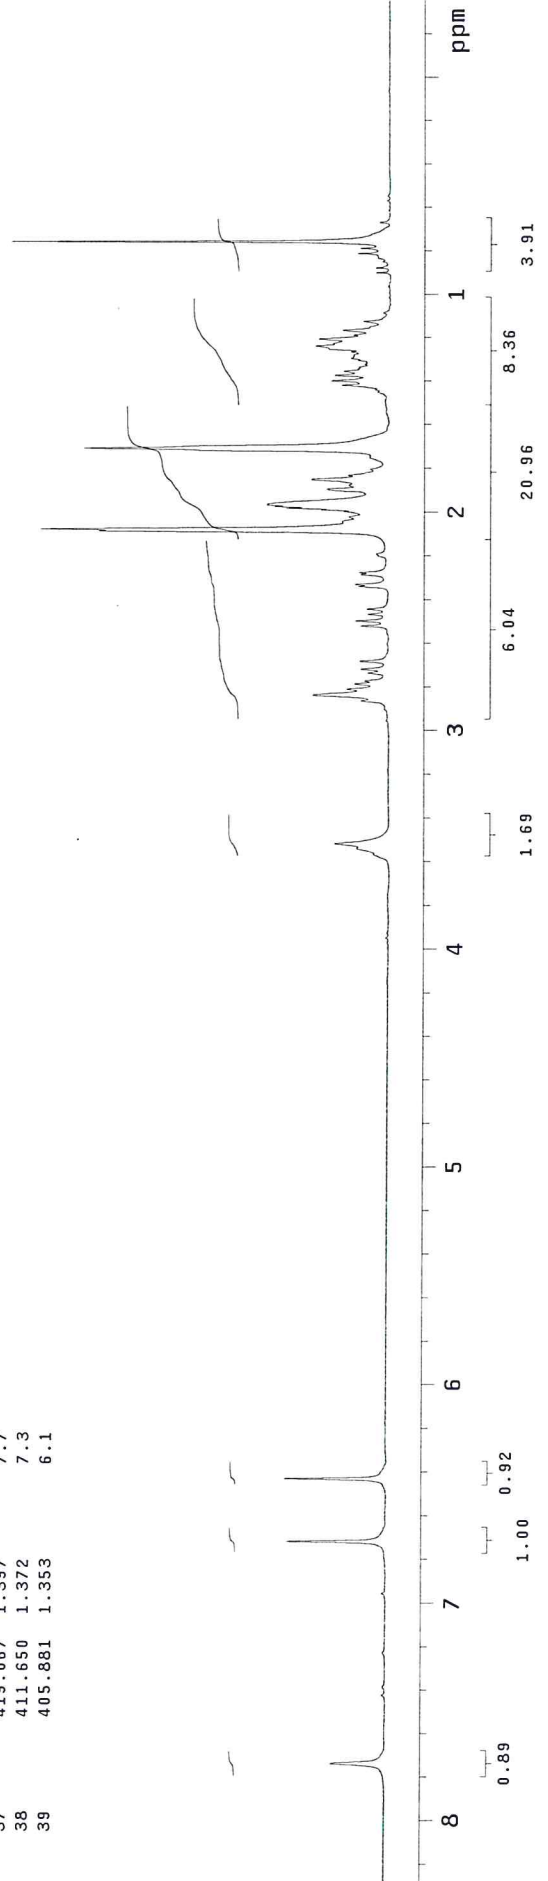



| INDEX | FREQUENCY | PPM     | HEIGHT |
|-------|-----------|---------|--------|
| 1     | 15499.344 | 205.433 | 82.8   |
| 2     | 11599.956 | 153.749 | 5.7    |
| 3     | 10115.783 | 134.077 | 5.3    |
| 4     | 10072.266 | 133.501 | 3.9    |
| 5     | 9694.352  | 128.492 | 5.6    |
| 6     | 9498.523  | 125.896 | 10.6   |
| 7     | 8770.179  | 116.242 | 10.2   |
| 8     | 6222.121  | 82.470  | 9.3    |
| 9     | 3481.670  | 46.147  | 12.0   |
| 10    | 3259.502  | 43.202  | 9.9    |
| 11    | 3218.275  | 42.656  | 6.0    |
| 12    | 3071.690  | 40.713  | 36.5   |
| 13    | 2806.005  | 37.192  | 32.5   |
| 14    | 2741.874  | 36.342  | 12.0   |
| 15    | 2672.017  | 35.416  | 11.9   |
| 16    | 2557.498  | 33.898  | 10.1   |
| 17    | 2489.931  | 33.002  | 11.5   |
| 18    | 2265.473  | 30.027  | 18.2   |
| 19    | 2254.021  | 29.875  | 6.8    |
| 20    | 2234.553  | 29.617  | 20.9   |
| 21    | 2213.939  | 29.344  | 65.0   |
| 22    | 2195.616  | 29.101  | 54.6   |
| 23    | 2176.148  | 28.843  | 47.3   |
| 24    | 2156.680  | 28.585  | 24.3   |
| 25    | 2137.211  | 28.327  | 8.8    |
| 26    | 1931.076  | 25.595  | 12.8   |
| 27    | 1050.421  | 13.923  | 12.4   |

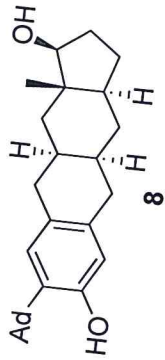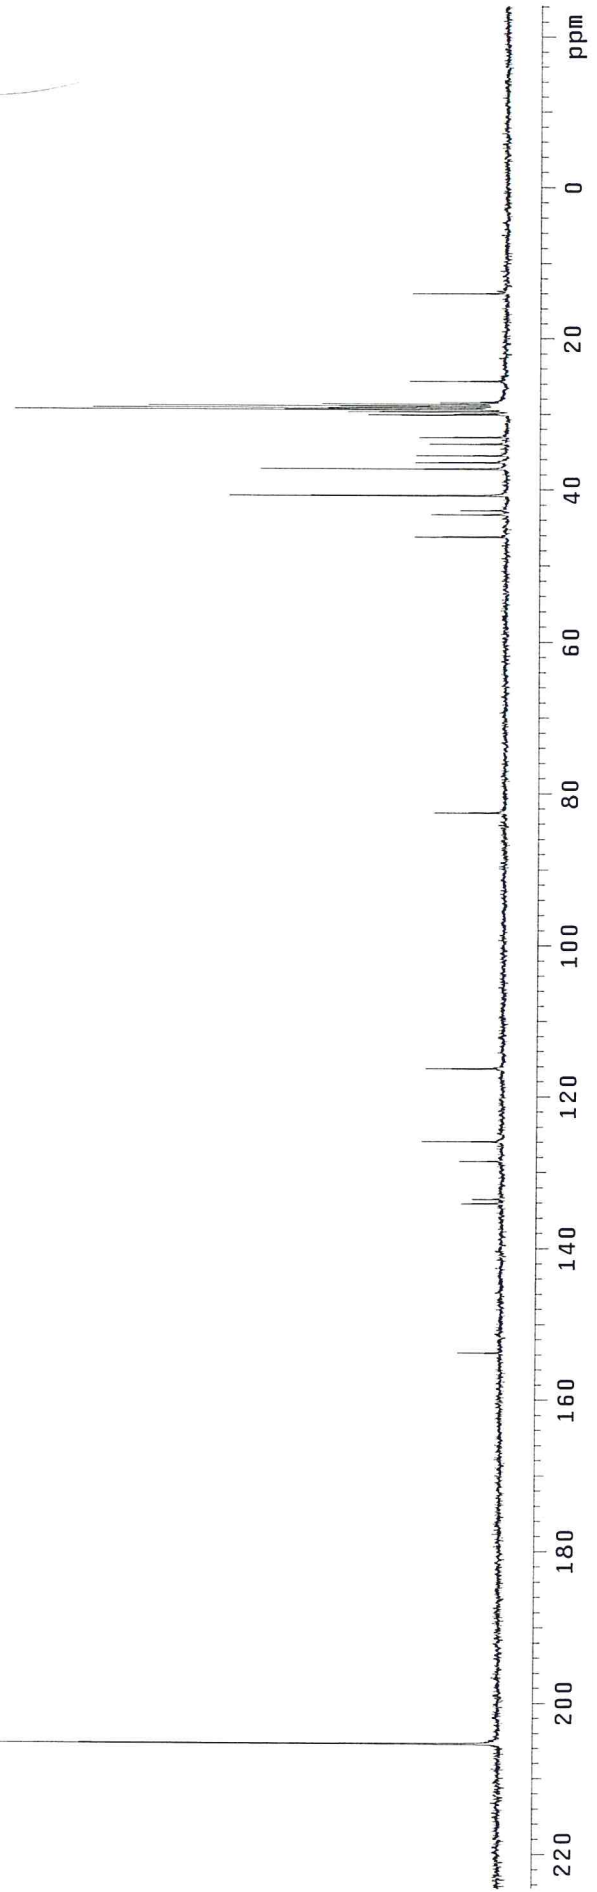

M21310

| INDEX | FREQUENCY | PPM   | HEIGHT |
|-------|-----------|-------|--------|
| 1     | 2680.614  | 8.934 | 25.7   |
| 2     | 2096.596  | 6.988 | 13.1   |
| 3     | 2088.904  | 6.962 | 14.0   |
| 4     | 1938.917  | 6.462 | 14.1   |
| 5     | 1930.676  | 6.435 | 13.3   |
| 6     | 1913.095  | 6.376 | 24.2   |
| 7     | 999.435   | 3.331 | 10.4   |
| 8     | 789.837   | 2.632 | 15.4   |
| 9     | 772.530   | 2.575 | 5.3    |
| 10    | 726.106   | 2.420 | 3.4    |
| 11    | 707.975   | 2.360 | 5.9    |
| 12    | 700.284   | 2.334 | 7.0    |
| 13    | 689.296   | 2.297 | 9.1    |
| 14    | 680.780   | 2.269 | 11.6   |
| 15    | 676.385   | 2.254 | 11.2   |
| 16    | 663.199   | 2.210 | 10.7   |
| 17    | 610.181   | 2.034 | 12.3   |
| 18    | 599.468   | 1.998 | 17.6   |
| 19    | 589.304   | 1.964 | 9.0    |
| 20    | 579.415   | 1.931 | 7.4    |
| 21    | 571.723   | 1.905 | 6.7    |
| 22    | 532.990   | 1.776 | 10.8   |
| 23    | 478.873   | 1.596 | 26.3   |
| 24    | 467.061   | 1.557 | 25.4   |
| 25    | 445.634   | 1.485 | 8.3    |
| 26    | 428.878   | 1.429 | 9.6    |
| 27    | 418.439   | 1.395 | 10.9   |
| 28    | 406.627   | 1.355 | 9.5    |
| 29    | 393.990   | 1.313 | 9.0    |
| 30    | 387.947   | 1.293 | 9.3    |
| 31    | 365.971   | 1.220 | 7.5    |
| 32    | 354.708   | 1.182 | 11.2   |
| 33    | 343.170   | 1.144 | 10.3   |
| 34    | 332.457   | 1.108 | 5.4    |
| 35    | 296.746   | 0.989 | 8.8    |
| 36    | 285.208   | 0.951 | 13.3   |
| 37    | 273.671   | 0.912 | 7.4    |
| 38    | 215.159   | 0.717 | 75.6   |

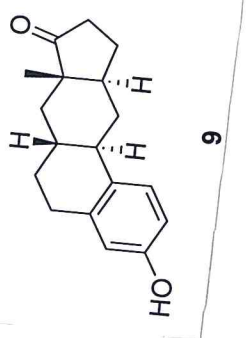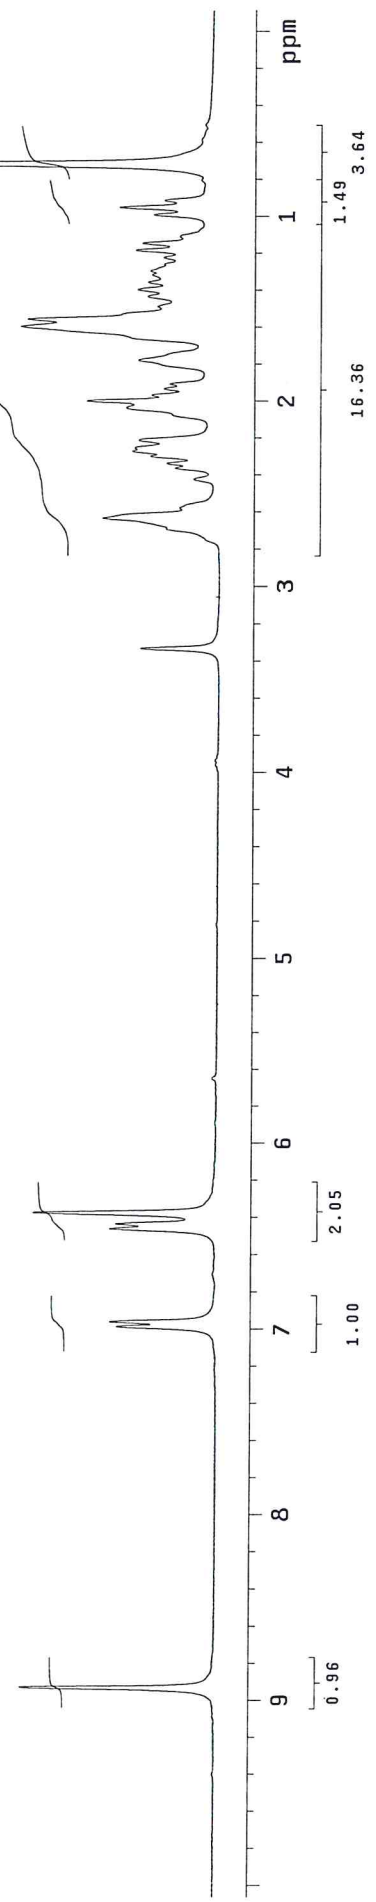

1310

13C OBSERVE

Pulse Sequence: s2pul  
Solvent: DMSO  
Ambient temperature  
GEMINI-300BB "mbp-nmr"

Relax. delay 1.327 sec  
Pulse 54.0 degrees  
Acq. time 0.873 sec  
Width 18761.7 Hz  
320 repetitions  
OBSERVE C13, 75.4473439 MHz  
DECOUPLE H1, 300.0504026 MHz  
Power 39 dB  
continuously on  
WALTZ-16 modulated  
DATA PROCESSING  
Line broadening 1.1 Hz  
FT size 32768  
Total time 0 min, 0 sec

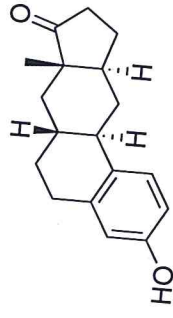

9

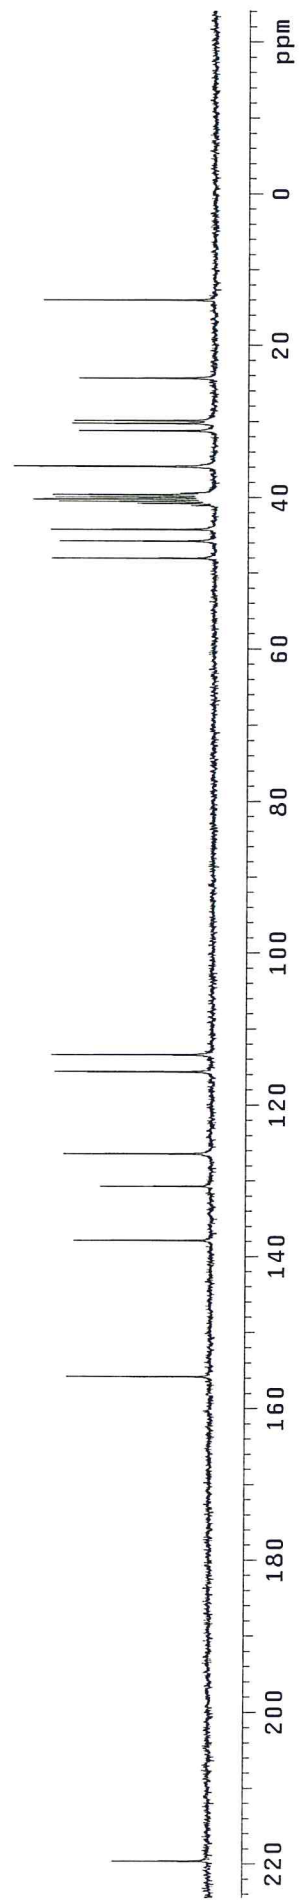

1311

| INDEX | FREQUENCY PPM | HEIGHT | INDEX | FREQUENCY PPM | HEIGHT |
|-------|---------------|--------|-------|---------------|--------|
| 40    | 522.905       | 1.743  | 40    | 522.905       | 1.743  |
| 41    | 511.917       | 1.706  | 41    | 511.917       | 1.706  |
| 42    | 509.719       | 1.699  | 42    | 509.719       | 1.699  |
| 43    | 505.873       | 1.686  | 43    | 505.873       | 1.686  |
| 44    | 502.027       | 1.673  | 44    | 502.027       | 1.673  |
| 45    | 499.830       | 1.666  | 45    | 499.830       | 1.666  |
| 46    | 495.709       | 1.652  | 46    | 495.709       | 1.652  |
| 47    | 493.511       | 1.645  | 47    | 493.511       | 1.645  |
| 48    | 463.844       | 1.546  | 48    | 463.844       | 1.546  |
| 49    | 461.371       | 1.538  | 49    | 461.371       | 1.538  |
| 50    | 458.624       | 1.528  | 50    | 458.624       | 1.528  |
| 51    | 455.328       | 1.518  | 51    | 455.328       | 1.518  |
| 52    | 444.889       | 1.483  | 52    | 444.889       | 1.483  |
| 53    | 433.626       | 1.445  | 53    | 433.626       | 1.445  |
| 54    | 422.089       | 1.407  | 54    | 422.089       | 1.407  |
| 55    | 416.045       | 1.387  | 55    | 416.045       | 1.387  |
| 56    | 410.551       | 1.368  | 56    | 410.551       | 1.368  |
| 57    | 406.705       | 1.355  | 57    | 406.705       | 1.355  |
| 58    | 405.057       | 1.350  | 58    | 405.057       | 1.350  |
| 59    | 401.486       | 1.338  | 59    | 401.486       | 1.338  |
| 60    | 395.717       | 1.319  | 60    | 395.717       | 1.319  |
| 61    | 393.520       | 1.312  | 61    | 393.520       | 1.312  |
| 62    | 384.729       | 1.282  | 62    | 384.729       | 1.282  |
| 63    | 364.401       | 1.214  | 63    | 364.401       | 1.214  |
| 64    | 348.469       | 1.161  | 64    | 348.469       | 1.161  |
| 65    | 336.931       | 1.123  | 65    | 336.931       | 1.123  |
| 66    | 325.394       | 1.084  | 66    | 325.394       | 1.084  |
| 67    | 313.856       | 1.046  | 67    | 313.856       | 1.046  |
| 68    | 271.002       | 0.903  | 68    | 271.002       | 0.903  |
| 69    | 259.190       | 0.854  | 69    | 259.190       | 0.854  |
| 70    | 252.872       | 0.843  | 70    | 252.872       | 0.843  |
| 71    | 247.103       | 0.824  | 71    | 247.103       | 0.824  |
| 72    | 211.941       | 0.706  | 72    | 211.941       | 0.706  |
| 73    | -21.556       | -0.072 | 73    | -21.556       | -0.072 |

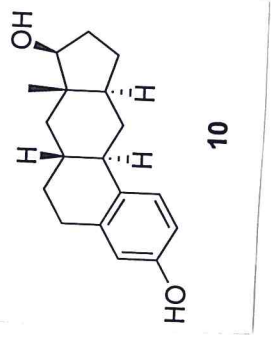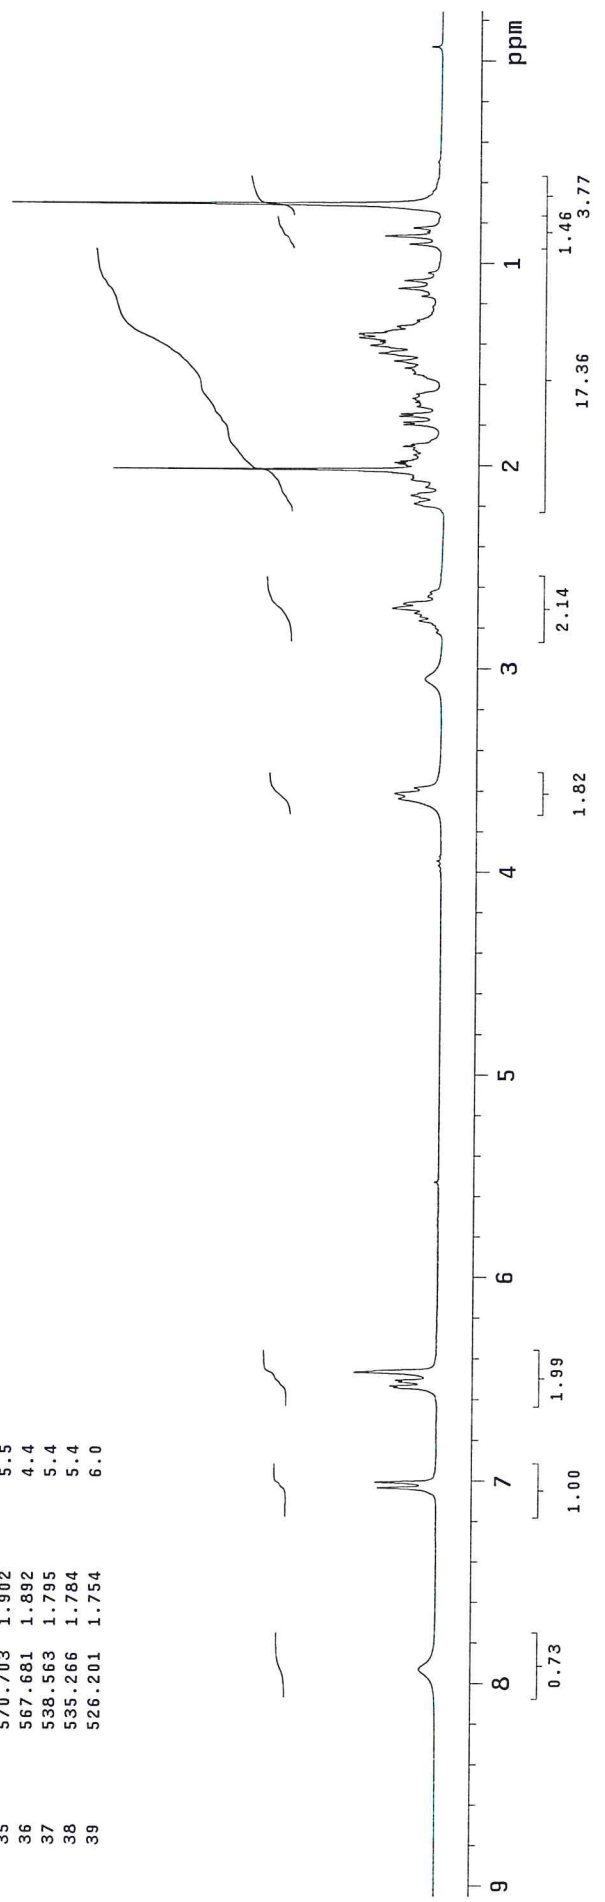

1311

| INDEX | FREQUENCY | PPM     | HEIGHT |
|-------|-----------|---------|--------|
| 1     | 15516.522 | 205.660 | 33.8   |
| 2     | 11714.475 | 155.267 | 6.2    |
| 3     | 10400.937 | 137.857 | 7.4    |
| 4     | 9925.681  | 131.558 | 7.1    |
| 5     | 9505.395  | 125.987 | 15.0   |
| 6     | 8694.597  | 115.241 | 12.4   |
| 7     | 8512.511  | 112.827 | 12.3   |
| 8     | 6113.328  | 81.028  | 12.2   |
| 9     | 3431.281  | 45.479  | 16.6   |
| 10    | 3396.926  | 45.024  | 15.8   |
| 11    | 3346.537  | 44.356  | 16.2   |
| 12    | 3275.535  | 43.415  | 9.1    |
| 13    | 2724.696  | 36.114  | 16.2   |
| 14    | 2366.250  | 31.363  | 16.3   |
| 15    | 2283.796  | 30.270  | 12.7   |
| 16    | 2271.199  | 30.103  | 24.1   |
| 17    | 2256.312  | 29.906  | 5.4    |
| 18    | 2237.988  | 29.663  | 9.2    |
| 19    | 2218.520  | 29.405  | 19.1   |
| 20    | 2199.052  | 29.147  | 23.2   |
| 21    | 2179.583  | 28.889  | 20.8   |
| 22    | 2160.115  | 28.631  | 11.2   |
| 23    | 2140.647  | 28.373  | 4.5    |
| 24    | 1927.641  | 25.549  | 18.8   |
| 25    | 840.851   | 11.145  | 13.8   |

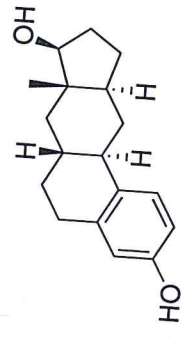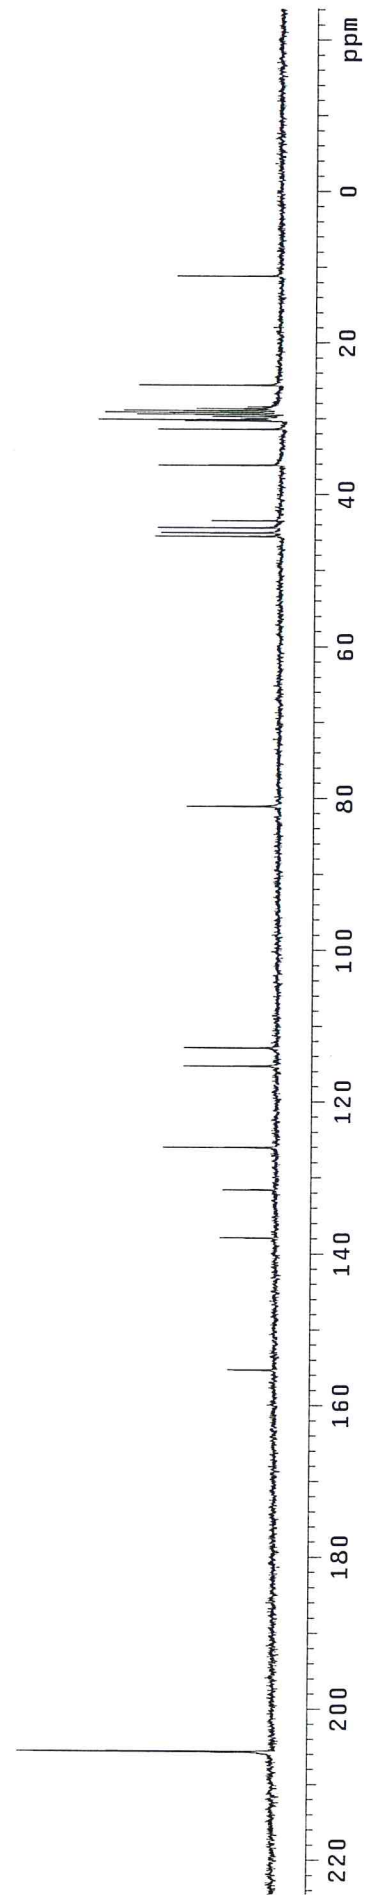

1313

CDCl<sub>3</sub>-G2060

| INDEX | FREQUENCY | PPM    | HEIGHT |
|-------|-----------|--------|--------|
| 1     | 2106.363  | 7.020  | 13.8   |
| 2     | 2097.023  | 6.989  | 14.9   |
| 3     | 1918.741  | 6.395  | 13.8   |
| 4     | 818.283   | 2.727  | 4.2    |
| 5     | 811.965   | 2.706  | 4.3    |
| 6     | 806.471   | 2.688  | 4.6    |
| 7     | 795.208   | 2.650  | 6.0    |
| 8     | 796.856   | 2.656  | 6.3    |
| 9     | 791.088   | 2.637  | 5.7    |
| 10    | 780.374   | 2.601  | 2.6    |
| 11    | 716.643   | 2.388  | 10.7   |
| 12    | 705.655   | 2.352  | 8.3    |
| 13    | 698.513   | 2.328  | 8.8    |
| 14    | 649.341   | 2.164  | 7.7    |
| 15    | 613.355   | 2.044  | 59.2   |
| 16    | 600.993   | 2.003  | 10.8   |
| 17    | 585.885   | 1.953  | 23.4   |
| 18    | 568.579   | 1.895  | 7.4    |
| 19    | 498.804   | 1.662  | 56.6   |
| 20    | 476.279   | 1.587  | 5.4    |
| 21    | 463.368   | 1.544  | 5.4    |
| 22    | 453.204   | 1.510  | 5.2    |
| 23    | 441.117   | 1.470  | 3.6    |
| 24    | 415.020   | 1.383  | 6.8    |
| 25    | 409.251   | 1.364  | 6.5    |
| 26    | 402.658   | 1.342  | 8.4    |
| 27    | 390.846   | 1.303  | 6.0    |
| 28    | 378.210   | 1.260  | 2.6    |
| 29    | 344.971   | 1.150  | 4.8    |
| 30    | 331.510   | 1.105  | 5.3    |
| 31    | 318.874   | 1.063  | 6.9    |
| 32    | 306.787   | 1.022  | 3.5    |
| 33    | 238.661   | 0.795  | 42.7   |
| 34    | -9.121    | -0.030 | 2.4    |

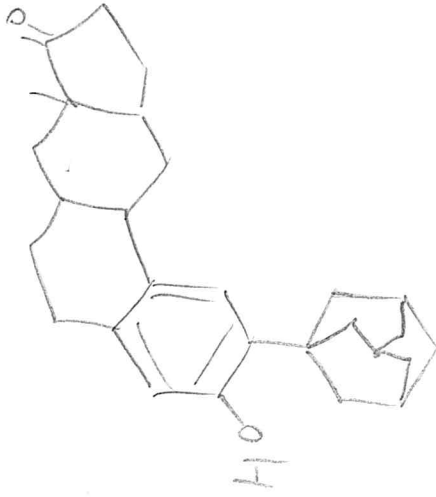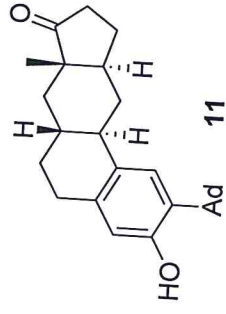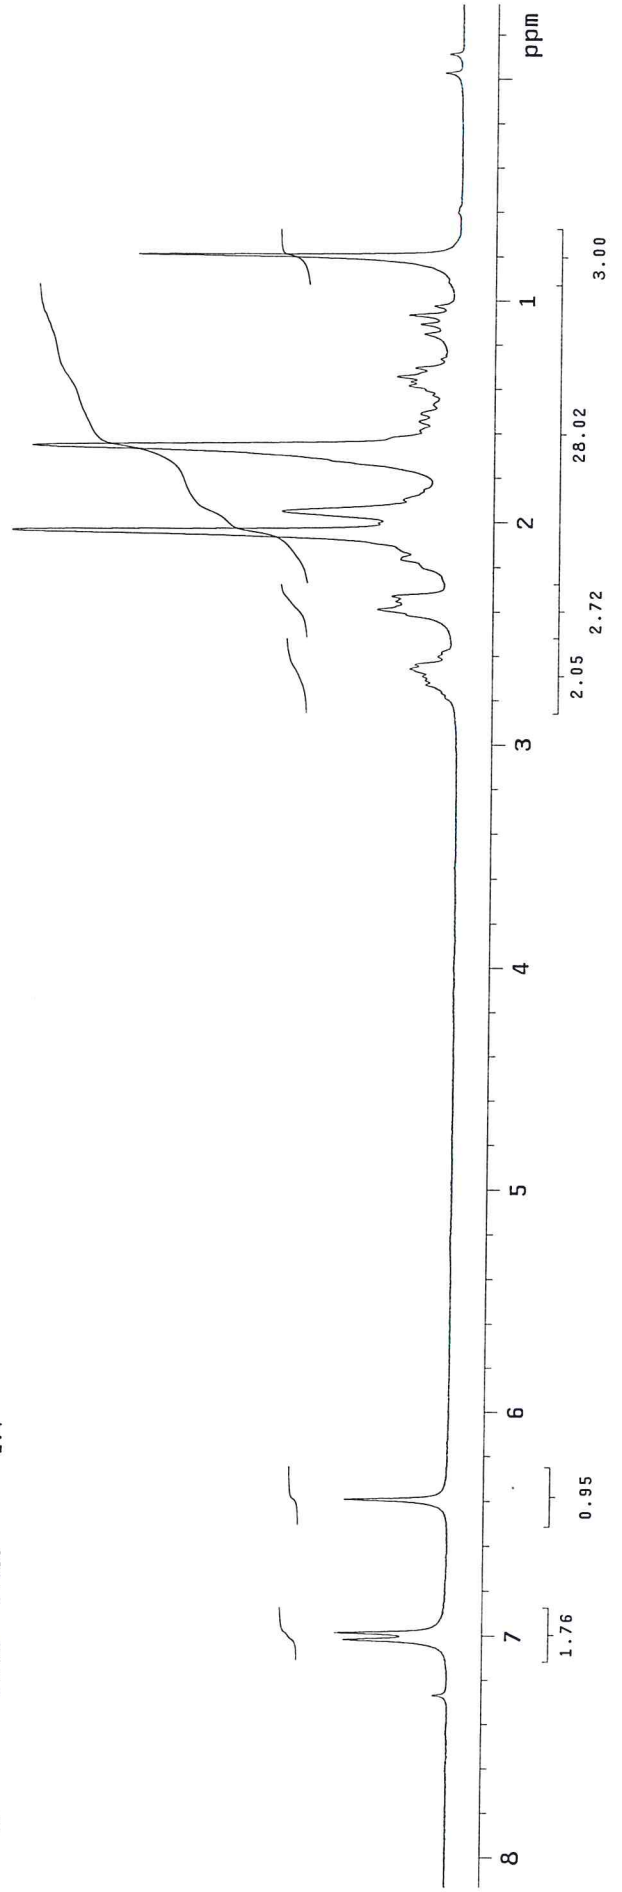

1313

| INDEX | FREQUENCY | PPM     | HEIGHT |
|-------|-----------|---------|--------|
| 1     | 16637.441 | 220.517 | 4.8    |
| 2     | 15625.088 | 207.099 | 9.3    |
| 3     | 11571.099 | 153.366 | 5.8    |
| 4     | 10171.671 | 134.818 | 6.4    |
| 5     | 10090.362 | 133.740 | 4.8    |
| 6     | 9844.145  | 130.477 | 5.6    |
| 7     | 9294.452  | 123.191 | 6.8    |
| 8     | 8794.002  | 116.558 | 7.6    |
| 9     | 5857.722  | 77.640  | 16.3   |
| 10    | 5825.657  | 77.215  | 17.7   |
| 11    | 5793.591  | 76.790  | 17.1   |
| 12    | 3621.157  | 47.996  | 7.6    |
| 13    | 3464.265  | 45.916  | 7.6    |
| 14    | 3349.746  | 44.398  | 7.4    |
| 15    | 3057.721  | 40.528  | 21.4   |
| 16    | 2951.218  | 39.116  | 6.0    |
| 17    | 2796.617  | 37.067  | 19.5   |
| 18    | 2761.115  | 36.597  | 7.5    |
| 19    | 2690.113  | 35.655  | 12.9   |
| 20    | 2329.377  | 30.874  | 7.1    |
| 21    | 2296.166  | 30.434  | 3.9    |
| 22    | 2276.698  | 30.176  | 6.7    |
| 23    | 2257.230  | 29.918  | 8.7    |
| 24    | 2237.761  | 29.660  | 7.8    |
| 25    | 2230.890  | 29.569  | 8.8    |
| 26    | 2206.841  | 29.250  | 9.0    |
| 27    | 2193.099  | 29.068  | 26.1   |
| 28    | 1809.459  | 23.983  | 7.0    |
| 29    | 1022.710  | 13.555  | 7.4    |

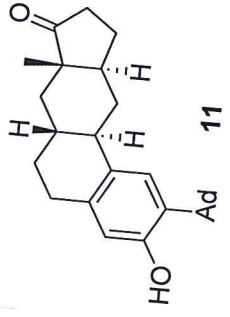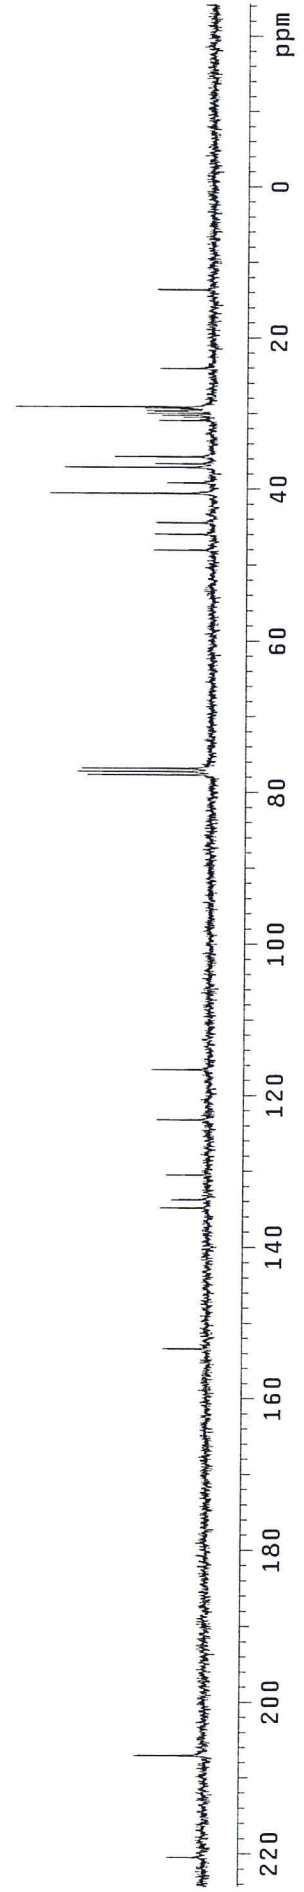

1312

| INDEX | FREQUENCY PPM | HEIGHT | INDEX | FREQUENCY PPM | HEIGHT |
|-------|---------------|--------|-------|---------------|--------|
| 1     | 2181.345      | 7.270  | 40    | 231.782       | 0.772  |
| 2     | 2104.978      | 7.015  | 41    | 205.685       | 0.686  |
| 3     | 2081.353      | 6.937  | 42    | -32.207       | -0.107 |
| 4     | 1915.158      | 6.383  |       |               |        |
| 5     | 1565.462      | 5.217  |       |               |        |
| 6     | 1097.919      | 3.659  |       |               |        |
| 7     | 1090.227      | 3.634  |       |               |        |
| 8     | 1082.535      | 3.608  |       |               |        |
| 9     | 817.448       | 2.724  |       |               |        |
| 10    | 811.129       | 2.703  |       |               |        |
| 11    | 805.910       | 2.686  |       |               |        |
| 12    | 799.867       | 2.666  |       |               |        |
| 13    | 793.823       | 2.646  |       |               |        |
| 14    | 787.780       | 2.626  |       |               |        |
| 15    | 776.517       | 2.588  |       |               |        |
| 16    | 771.572       | 2.572  |       |               |        |
| 17    | 744.377       | 2.481  |       |               |        |
| 18    | 664.164       | 2.214  |       |               |        |
| 19    | 651.527       | 2.171  |       |               |        |
| 20    | 618.838       | 2.062  |       |               |        |
| 21    | 612.245       | 2.040  |       |               |        |
| 22    | 584.775       | 1.949  |       |               |        |
| 23    | 530.933       | 1.769  |       |               |        |
| 24    | 527.636       | 1.759  |       |               |        |
| 25    | 518.846       | 1.729  |       |               |        |
| 26    | 515.550       | 1.718  |       |               |        |
| 27    | 498.243       | 1.661  |       |               |        |
| 28    | 468.026       | 1.560  |       |               |        |
| 29    | 457.587       | 1.525  |       |               |        |
| 30    | 443.852       | 1.479  |       |               |        |
| 31    | 429.018       | 1.430  |       |               |        |
| 32    | 407.591       | 1.358  |       |               |        |
| 33    | 388.637       | 1.295  |       |               |        |
| 34    | 366.111       | 1.220  |       |               |        |
| 35    | 354.849       | 1.183  |       |               |        |
| 36    | 346.333       | 1.154  |       |               |        |
| 37    | 274.361       | 0.914  |       |               |        |
| 38    | 262.274       | 0.874  |       |               |        |
| 39    | 250.187       | 0.834  |       |               |        |

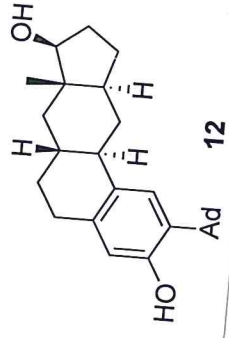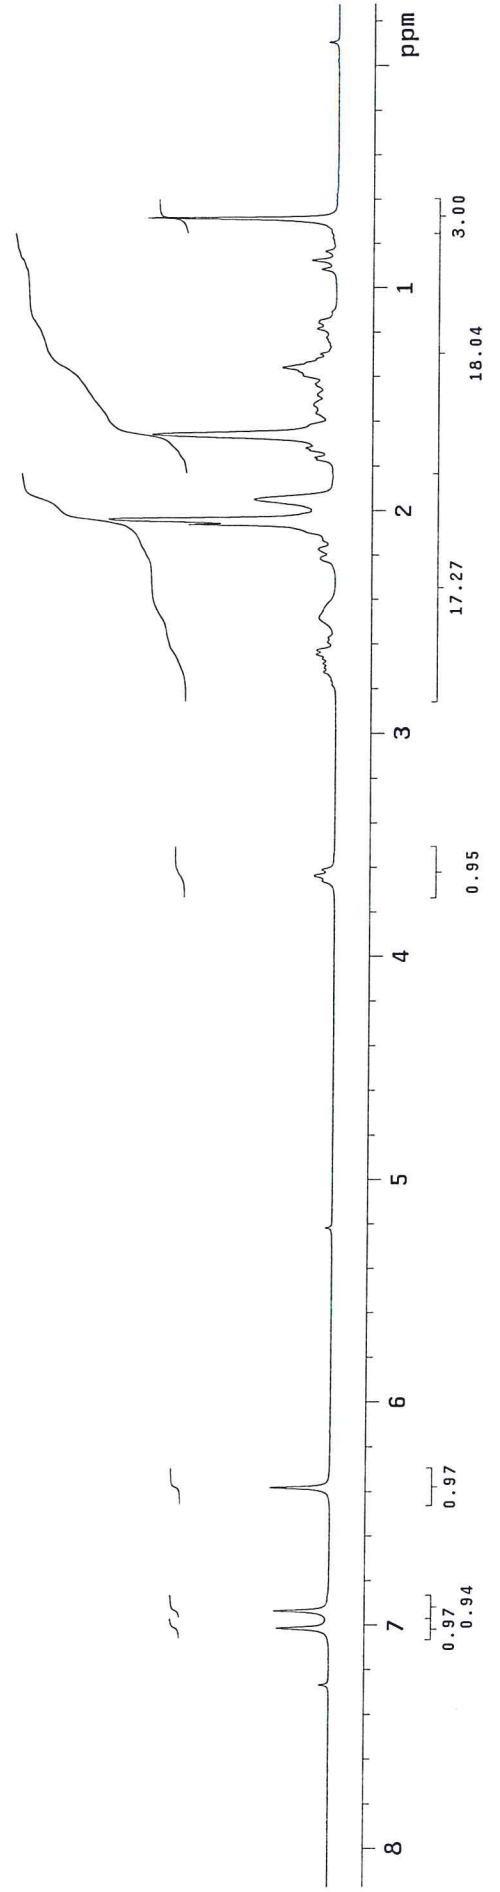



1312

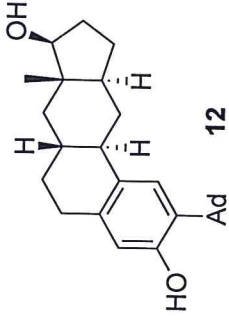

12

| INDEX | FREQUENCY | PPM     | HEIGHT |
|-------|-----------|---------|--------|
| 1     | 15630.784 | 207.176 | 9.4    |
| 2     | 11557.326 | 153.185 | 5.1    |
| 3     | 10178.512 | 134.909 | 5.4    |
| 4     | 10081.170 | 133.619 | 5.8    |
| 5     | 9896.794  | 131.175 | 4.8    |
| 6     | 9295.566  | 123.207 | 5.3    |
| 7     | 8790.536  | 116.513 | 6.9    |
| 8     | 6148.571  | 81.495  | 5.9    |
| 9     | 5857.692  | 77.640  | 19.1   |
| 10    | 5825.626  | 77.215  | 18.8   |
| 11    | 5793.561  | 76.790  | 19.1   |
| 12    | 3427.588  | 45.430  | 7.2    |
| 13    | 3370.329  | 44.671  | 5.3    |
| 14    | 3353.151  | 44.444  | 6.3    |
| 15    | 3266.116  | 43.290  | 7.0    |
| 16    | 3058.836  | 40.543  | 18.8   |
| 17    | 2798.876  | 37.097  | 16.1   |
| 18    | 2759.940  | 36.581  | 7.7    |
| 19    | 2704.970  | 35.853  | 6.4    |
| 20    | 2353.396  | 31.193  | 5.8    |
| 21    | 2297.281  | 30.449  | 3.7    |
| 22    | 2289.265  | 30.343  | 5.5    |
| 23    | 2277.813  | 30.191  | 7.1    |
| 24    | 2258.344  | 29.933  | 12.7   |
| 25    | 2238.876  | 29.675  | 7.6    |
| 26    | 2218.263  | 29.402  | 7.2    |
| 27    | 2194.214  | 29.083  | 21.8   |
| 28    | 1925.093  | 25.516  | 5.7    |
| 29    | 846.319   | 11.217  | 6.4    |

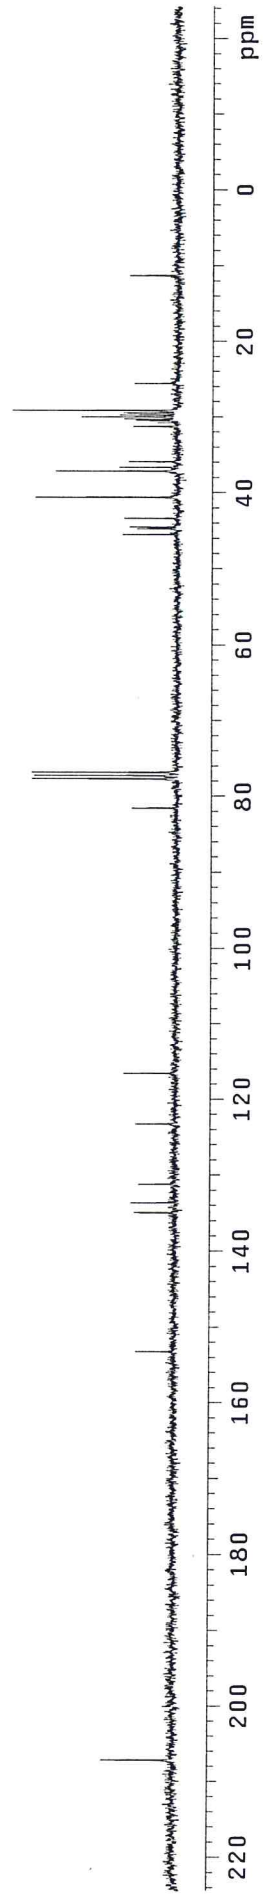

MQ 1042

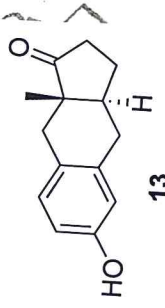

| INDEX | FREQUENCY PPM | HEIGHT | INDEX | FREQUENCY PPM | HEIGHT |
|-------|---------------|--------|-------|---------------|--------|
| 1     | 2181.345      | 7.270  | 40    | 531.208       | 1.770  |
| 2     | 2101.407      | 7.004  | 41    | 528.735       | 1.762  |
| 3     | 2093.440      | 6.977  | 42    | 519.670       | 1.732  |
| 4     | 2011.304      | 6.703  | 43    | 509.781       | 1.699  |
| 5     | 2009.107      | 6.696  | 44    | 508.133       | 1.694  |
| 6     | 2000.591      | 6.668  | 45    | 272.163       | 0.907  |
| 7     | 1998.119      | 6.659  | 46    | 265.021       | 0.883  |
| 8     | 1805.277      | 6.017  | 47    | 2.955         | 0.010  |
| 9     | 885.299       | 2.951  |       |               |        |
| 10    | 879.805       | 2.932  |       |               |        |
| 11    | 868.542       | 2.895  |       |               |        |
| 12    | 863.598       | 2.878  |       |               |        |
| 13    | 836.402       | 2.788  |       |               |        |
| 14    | 820.469       | 2.734  |       |               |        |
| 15    | 815.799       | 2.719  |       |               |        |
| 16    | 810.305       | 2.701  |       |               |        |
| 17    | 799.592       | 2.665  |       |               |        |
| 18    | 793.823       | 2.646  |       |               |        |
| 19    | 781.187       | 2.604  |       |               |        |
| 20    | 772.122       | 2.573  |       |               |        |
| 21    | 761.683       | 2.539  |       |               |        |
| 22    | 752.892       | 2.509  |       |               |        |
| 23    | 696.304       | 2.321  |       |               |        |
| 24    | 687.513       | 2.291  |       |               |        |
| 25    | 677.899       | 2.259  |       |               |        |
| 26    | 668.284       | 2.227  |       |               |        |
| 27    | 658.944       | 2.196  |       |               |        |
| 28    | 649.055       | 2.163  |       |               |        |
| 29    | 643.011       | 2.143  |       |               |        |
| 30    | 636.968       | 2.123  |       |               |        |
| 31    | 634.221       | 2.114  |       |               |        |
| 32    | 631.199       | 2.104  |       |               |        |
| 33    | 623.508       | 2.078  |       |               |        |
| 34    | 619.387       | 2.064  |       |               |        |
| 35    | 612.794       | 2.042  |       |               |        |
| 36    | 607.300       | 2.024  |       |               |        |
| 37    | 601.531       | 2.005  |       |               |        |
| 38    | 594.939       | 1.983  |       |               |        |
| 39    | 540.273       | 1.801  |       |               |        |

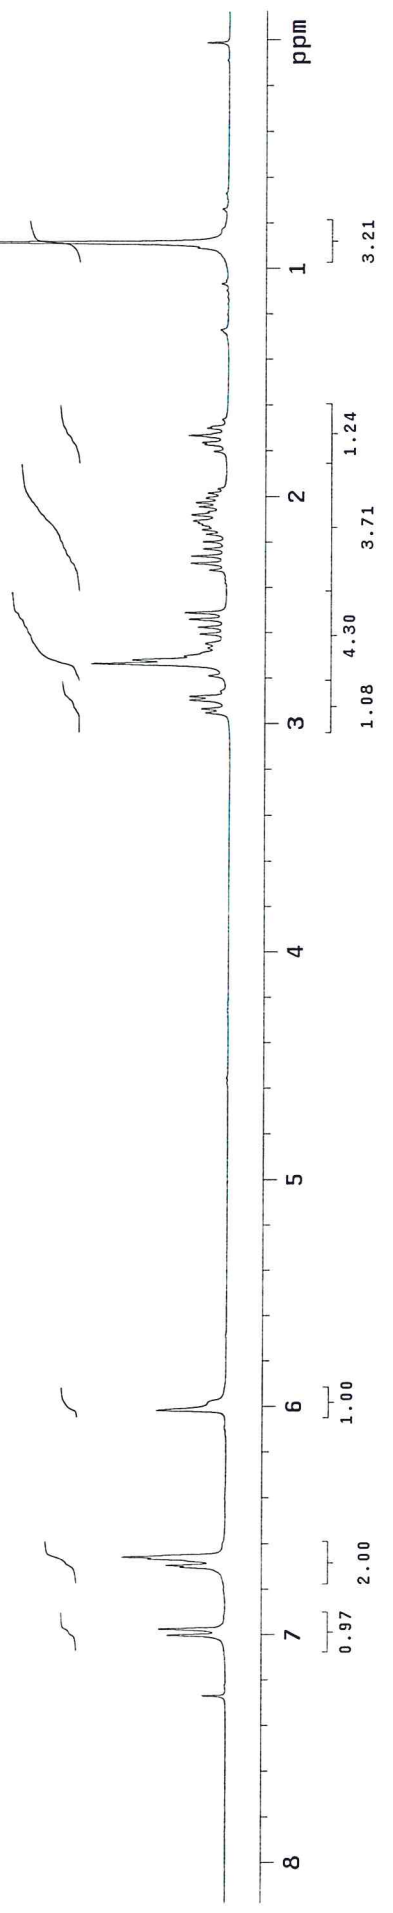

1042

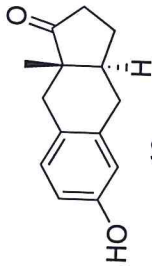

| INDEX | FREQUENCY | PPM     | HEIGHT |
|-------|-----------|---------|--------|
| 1     | 16796.592 | 222.628 | 5.4    |
| 2     | 11621.456 | 154.035 | 12.4   |
| 3     | 10320.515 | 136.792 | 7.6    |
| 4     | 9942.601  | 131.783 | 26.0   |
| 5     | 9569.267  | 126.834 | 8.5    |
| 6     | 8740.146  | 115.845 | 27.2   |
| 7     | 8598.142  | 113.963 | 27.3   |
| 8     | 5856.546  | 77.625  | 10.6   |
| 9     | 5824.480  | 77.200  | 11.7   |
| 10    | 5792.415  | 76.775  | 11.8   |
| 11    | 3576.463  | 47.404  | 10.7   |
| 12    | 3163.048  | 41.924  | 20.8   |
| 13    | 2765.665  | 36.657  | 26.8   |
| 14    | 2746.197  | 36.399  | 23.6   |
| 15    | 2385.460  | 31.618  | 23.4   |
| 16    | 1847.219  | 24.484  | 23.7   |
| 17    | 1016.953  | 13.479  | 27.4   |

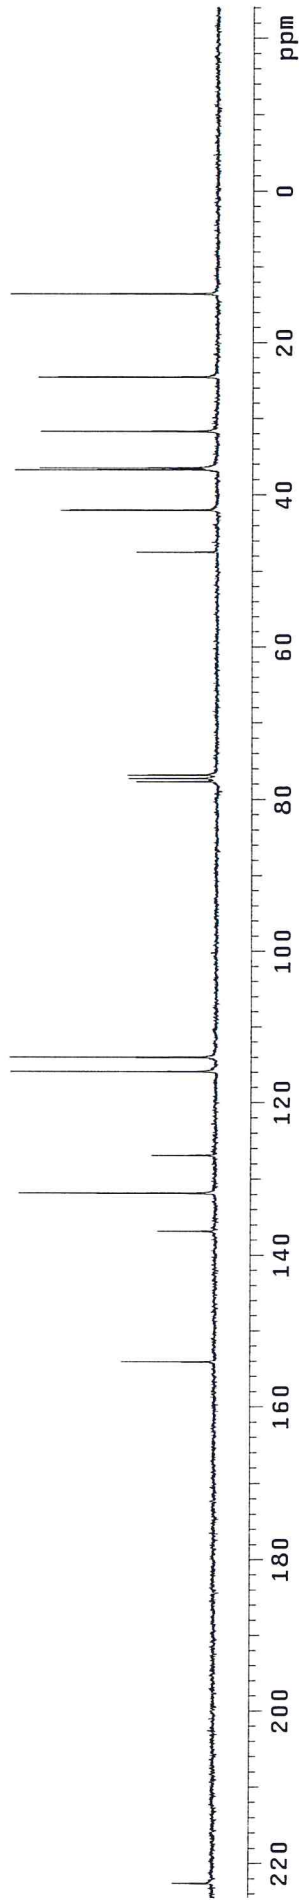

| INDEX | FREQUENCY | PPM   | HEIGHT |
|-------|-----------|-------|--------|
| 1     | 2649.297  | 8.830 | 15.5   |
| 2     | 2466.071  | 8.219 | 4.1    |
| 3     | 2002.648  | 6.674 | 11.7   |
| 4     | 1922.435  | 6.407 | 13.4   |
| 5     | 973.063   | 3.243 | 37.7   |
| 6     | 805.495   | 2.685 | 2.0    |
| 7     | 801.099   | 2.670 | 2.4    |
| 8     | 789.013   | 2.630 | 3.4    |
| 9     | 785.441   | 2.618 | 3.5    |
| 10    | 744.511   | 2.481 | 3.5    |
| 11    | 726.930   | 2.423 | 16.2   |
| 12    | 723.084   | 2.410 | 11.2   |
| 13    | 706.602   | 2.355 | 3.0    |
| 14    | 696.163   | 2.320 | 3.5    |
| 15    | 687.647   | 2.292 | 3.6    |
| 16    | 625.015   | 2.083 | 3.1    |
| 17    | 615.675   | 2.052 | 2.7    |
| 18    | 606.061   | 2.020 | 2.1    |
| 19    | 597.545   | 1.991 | 4.7    |
| 20    | 580.513   | 1.935 | 50.0   |
| 21    | 549.747   | 1.832 | 3.6    |
| 22    | 544.253   | 1.814 | 2.6    |
| 23    | 537.934   | 1.793 | 2.0    |
| 24    | 483.269   | 1.611 | 38.8   |
| 25    | 466.512   | 1.555 | 4.3    |
| 26    | 456.348   | 1.521 | 2.4    |
| 27    | 192.908   | 0.643 | 39.3   |

1044  
DMSO

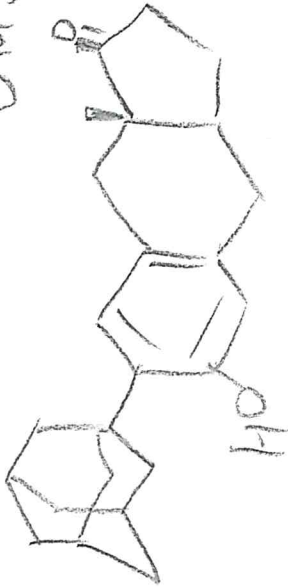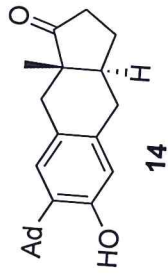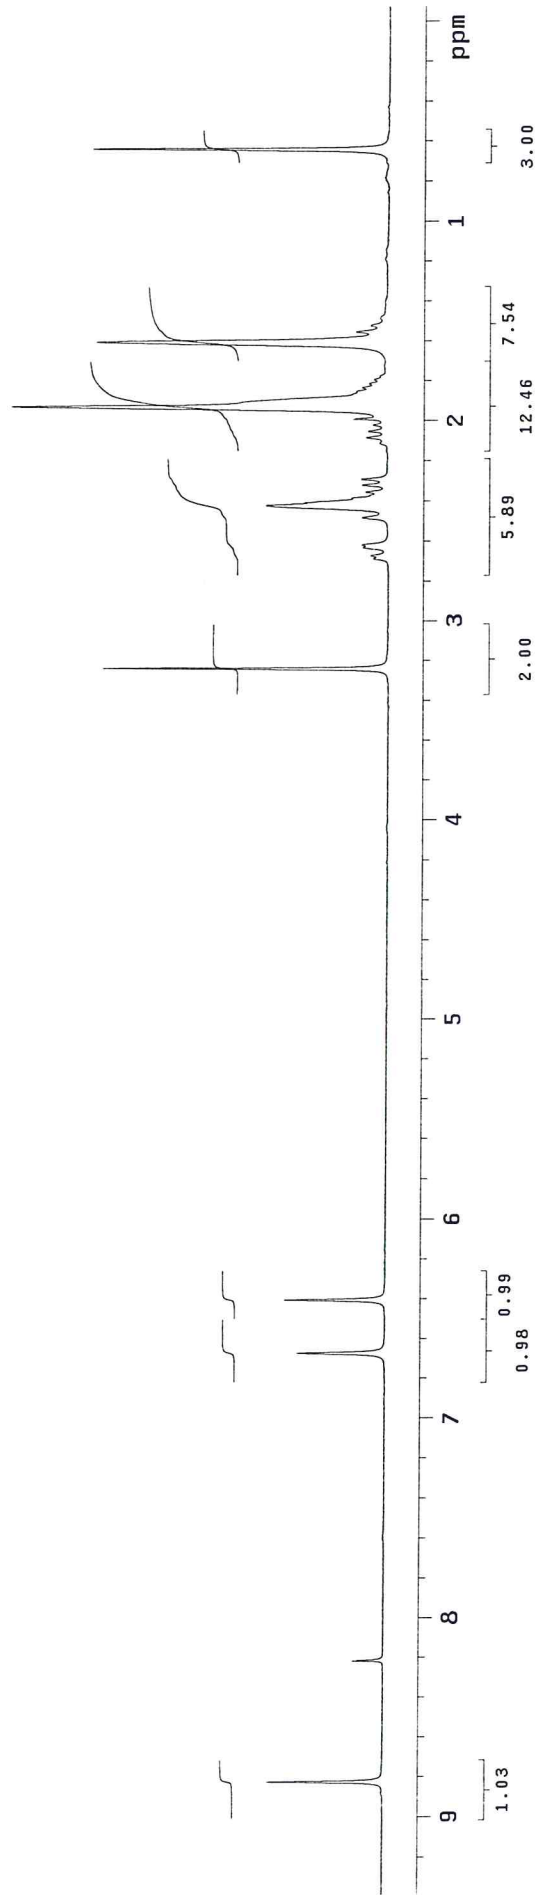

1044

| INDEX | FREQUENCY | PPM     | HEIGHT |
|-------|-----------|---------|--------|
| 1     | 16613.325 | 220.197 | 8.2    |
| 2     | 11595.082 | 153.684 | 13.0   |
| 3     | 10090.296 | 133.739 | 9.3    |
| 4     | 10030.746 | 132.950 | 11.8   |
| 5     | 9639.089  | 127.759 | 13.0   |
| 6     | 9371.113  | 124.207 | 11.2   |
| 7     | 8788.209  | 116.481 | 12.0   |
| 8     | 3506.571  | 46.477  | 15.4   |
| 9     | 3097.736  | 41.058  | 13.3   |
| 10    | 3043.912  | 40.345  | 7.4    |
| 11    | 3022.154  | 40.056  | 22.4   |
| 12    | 3010.702  | 39.905  | 37.2   |
| 13    | 3001.540  | 39.783  | 44.3   |
| 14    | 2980.927  | 39.510  | 49.5   |
| 15    | 2959.168  | 39.222  | 40.7   |
| 16    | 2938.554  | 38.948  | 21.0   |
| 17    | 2917.941  | 38.675  | 7.1    |
| 18    | 2761.049  | 36.596  | 31.4   |
| 19    | 2743.871  | 36.368  | 11.9   |
| 20    | 2698.063  | 35.761  | 13.5   |
| 21    | 2686.612  | 35.609  | 11.0   |
| 22    | 2281.213  | 30.236  | 10.9   |
| 23    | 2139.208  | 28.354  | 44.0   |
| 24    | 1800.231  | 23.861  | 11.6   |
| 25    | 983.707   | 13.038  | 16.8   |

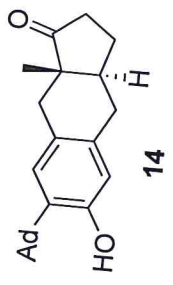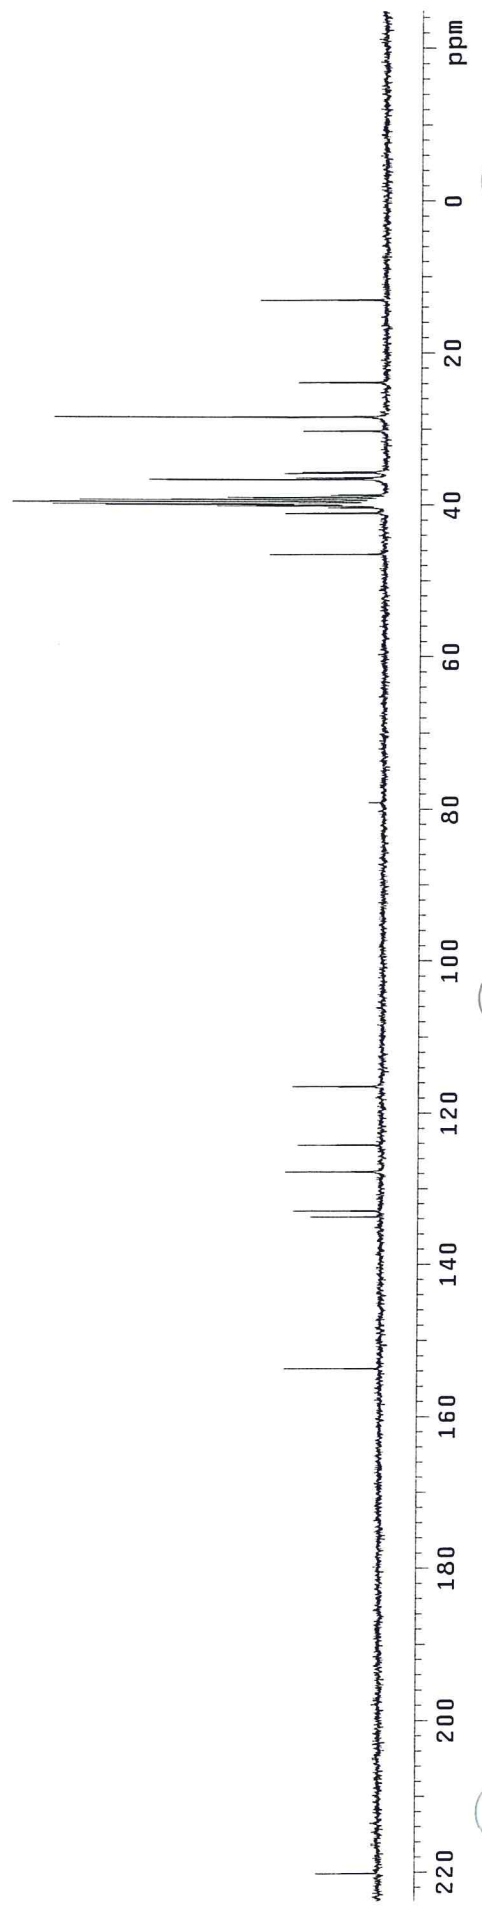

1043

| INDEX | FREQUENCY | PPM   | HEIGHT | INDEX | FREQUENCY | PPM   | HEIGHT |
|-------|-----------|-------|--------|-------|-----------|-------|--------|
| 1     | 2380.992  | 7.935 | 25.5   | 40    | 456.976   | 1.523 | 6.8    |
| 2     | 2039.811  | 6.798 | 12.6   | 41    | 452.855   | 1.509 | 4.6    |
| 3     | 2031.845  | 6.772 | 15.0   | 42    | 447.911   | 1.493 | 4.9    |
| 4     | 1960.422  | 6.534 | 9.0    | 43    | 444.065   | 1.480 | 6.5    |
| 5     | 1957.950  | 6.525 | 12.5   | 44    | 440.219   | 1.467 | 3.2    |
| 6     | 1949.434  | 6.497 | 32.1   | 45    | 435.275   | 1.451 | 3.1    |
| 7     | 1163.511  | 3.878 | 10.3   | 46    | 431.703   | 1.439 | 3.0    |
| 8     | 1158.566  | 3.861 | 12.4   | 47    | 414.672   | 1.382 | 3.5    |
| 9     | 1133.568  | 3.778 | 4.1    | 48    | 403.958   | 1.346 | 6.4    |
| 10    | 1128.623  | 3.761 | 4.1    | 49    | 398.464   | 1.328 | 5.6    |
| 11    | 1125.052  | 3.750 | 7.8    | 50    | 392.146   | 1.307 | 4.6    |
| 12    | 1120.382  | 3.734 | 6.8    | 51    | 386.927   | 1.290 | 3.8    |
| 13    | 1116.262  | 3.720 | 4.3    | 52    | 186.944   | 0.623 | 100.0  |
| 14    | 1111.867  | 3.706 | 3.4    |       |           |       |        |
| 15    | 974.515   | 3.248 | 10.7   |       |           |       |        |
| 16    | 798.981   | 2.663 | 17.1   |       |           |       |        |
| 17    | 793.487   | 2.645 | 6.2    |       |           |       |        |
| 18    | 783.323   | 2.611 | 22.1   |       |           |       |        |
| 19    | 777.279   | 2.591 | 8.6    |       |           |       |        |
| 20    | 729.481   | 2.431 | 5.9    |       |           |       |        |
| 21    | 713.823   | 2.379 | 16.9   |       |           |       |        |
| 22    | 699.538   | 2.331 | 10.3   |       |           |       |        |
| 23    | 603.942   | 2.013 | 49.2   |       |           |       |        |
| 24    | 597.624   | 1.992 | 4.3    |       |           |       |        |
| 25    | 593.228   | 1.977 | 5.8    |       |           |       |        |
| 26    | 588.833   | 1.962 | 6.9    |       |           |       |        |
| 27    | 584.987   | 1.950 | 5.3    |       |           |       |        |
| 28    | 580.043   | 1.933 | 4.5    |       |           |       |        |
| 29    | 575.647   | 1.919 | 5.7    |       |           |       |        |
| 30    | 572.626   | 1.908 | 2.7    |       |           |       |        |
| 31    | 566.857   | 1.889 | 5.0    |       |           |       |        |
| 32    | 507.247   | 1.691 | 2.4    |       |           |       |        |
| 33    | 503.126   | 1.677 | 3.5    |       |           |       |        |
| 34    | 499.555   | 1.665 | 5.0    |       |           |       |        |
| 35    | 490.215   | 1.634 | 8.8    |       |           |       |        |
| 36    | 483.347   | 1.611 | 8.2    |       |           |       |        |
| 37    | 476.205   | 1.587 | 6.2    |       |           |       |        |
| 38    | 470.711   | 1.569 | 5.5    |       |           |       |        |
| 39    | 465.492   | 1.551 | 4.8    |       |           |       |        |

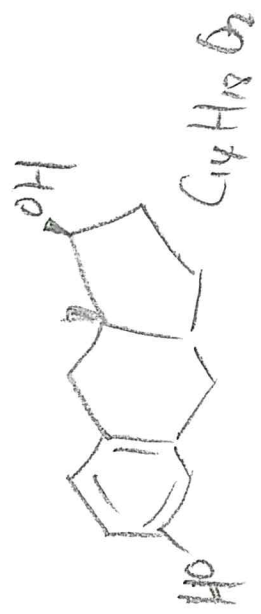

in acetone-d<sub>6</sub>

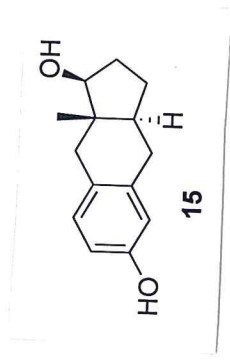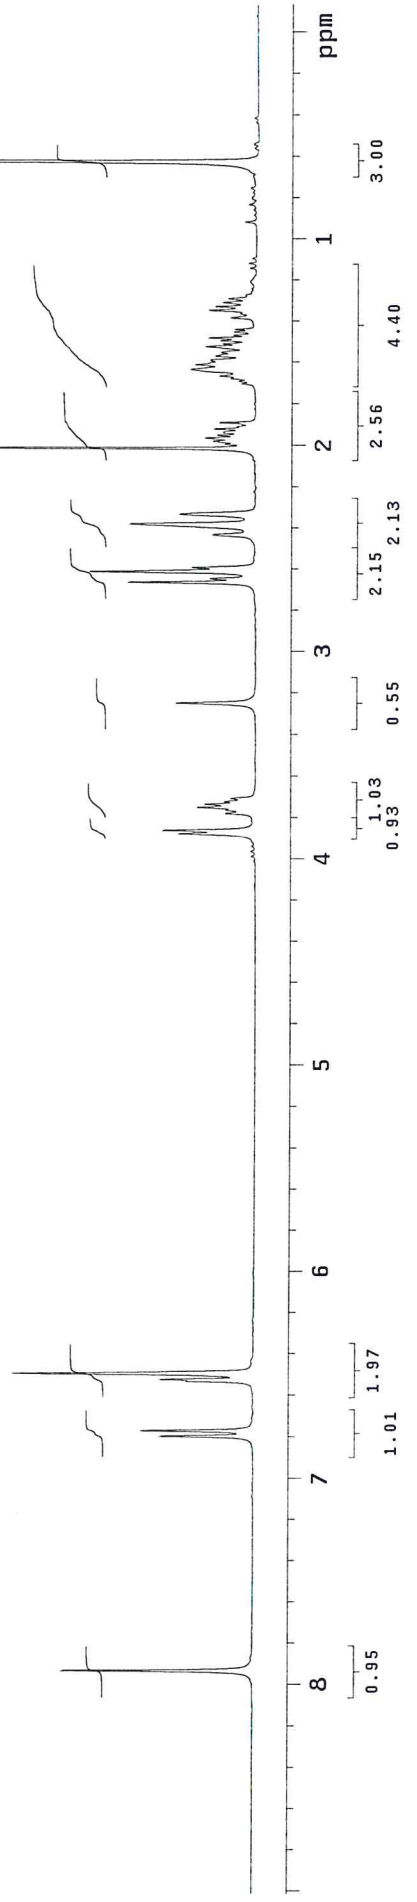

1047

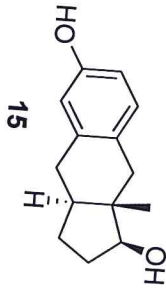

| INDEX | FREQUENCY | PPM     | HEIGHT |
|-------|-----------|---------|--------|
| 1     | 15592.307 | 206.665 | 11.5   |
| 2     | 11765.066 | 155.937 | 8.5    |
| 3     | 10410.300 | 137.981 | 8.5    |
| 4     | 9929.318  | 131.606 | 16.7   |
| 5     | 9656.762  | 127.993 | 6.1    |
| 6     | 8779.543  | 116.367 | 18.5   |
| 7     | 8613.490  | 114.166 | 17.5   |
| 8     | 6166.208  | 81.729  | 16.6   |
| 9     | 3276.882  | 43.433  | 8.5    |
| 10    | 3236.800  | 42.901  | 18.6   |
| 11    | 3171.524  | 42.036  | 13.3   |
| 12    | 2480.972  | 32.883  | 25.0   |
| 13    | 2350.419  | 31.153  | 16.1   |
| 14    | 2298.886  | 30.470  | 4.0    |
| 15    | 2279.417  | 30.212  | 8.3    |
| 16    | 2259.949  | 29.954  | 10.0   |
| 17    | 2240.481  | 29.696  | 8.7    |
| 18    | 2221.012  | 29.438  | 4.3    |
| 19    | 1987.393  | 26.341  | 24.8   |
| 20    | 786.083   | 10.419  | 19.1   |

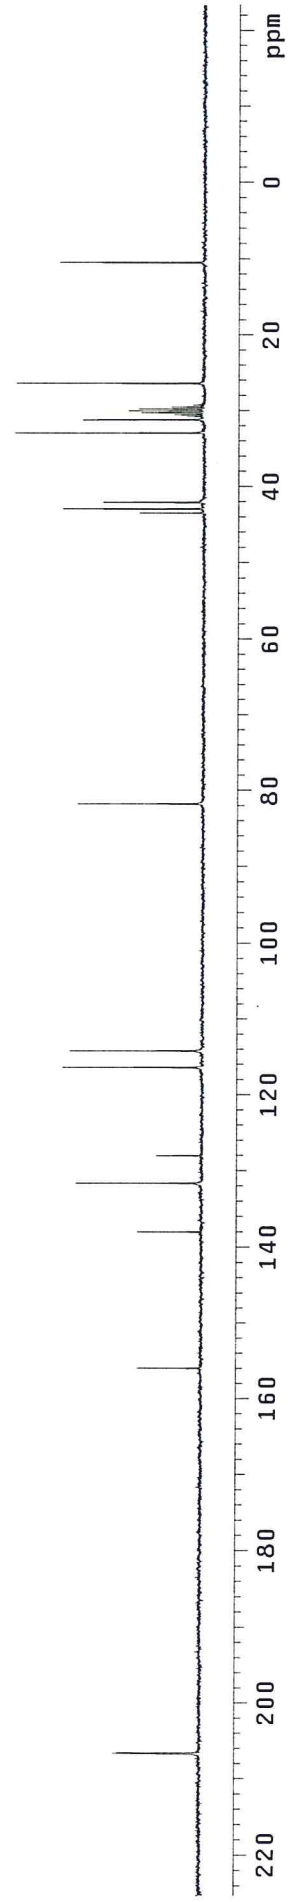

MO-1045

| INDEX | FREQUENCY PPM | HEIGHT | INDEX | FREQUENCY PPM | HEIGHT |
|-------|---------------|--------|-------|---------------|--------|
| 1     | 2181.345      | 7.270  | 6.8   |               |        |
| 2     | 2068.717      | 6.895  | 9.1   |               |        |
| 3     | 1930.542      | 6.434  | 9.7   |               |        |
| 4     | 1607.217      | 5.357  | 5.2   |               |        |
| 5     | 1178.407      | 3.927  | 2.4   |               |        |
| 6     | 1170.165      | 3.900  | 4.6   |               |        |
| 7     | 1161.375      | 3.871  | 2.4   |               |        |
| 8     | 839.973       | 2.799  | 3.8   |               |        |
| 9     | 824.590       | 2.748  | 7.2   |               |        |
| 10    | 811.953       | 2.706  | 3.0   |               |        |
| 11    | 807.284       | 2.691  | 2.9   |               |        |
| 12    | 771.572       | 2.572  | 4.4   |               |        |
| 13    | 756.464       | 2.521  | 5.0   |               |        |
| 14    | 745.201       | 2.484  | 2.5   |               |        |
| 15    | 728.719       | 2.429  | 1.5   |               |        |
| 16    | 661.966       | 2.206  | 5.4   |               |        |
| 17    | 638.067       | 2.127  | 37.5  |               |        |
| 18    | 623.508       | 2.078  | 13.2  |               |        |
| 19    | 536.702       | 1.789  | 35.4  |               |        |
| 20    | 527.911       | 1.759  | 11.7  |               |        |
| 21    | 513.077       | 1.710  | 2.4   |               |        |
| 22    | 507.308       | 1.691  | 2.2   |               |        |
| 23    | 492.200       | 1.640  | 4.2   |               |        |
| 24    | 481.212       | 1.604  | 2.4   |               |        |
| 25    | 477.366       | 1.591  | 2.3   |               |        |
| 26    | 472.696       | 1.575  | 2.2   |               |        |
| 27    | 468.575       | 1.562  | 2.3   |               |        |
| 28    | 459.236       | 1.531  | 1.8   |               |        |
| 29    | 443.852       | 1.479  | 2.2   |               |        |
| 30    | 438.908       | 1.463  | 2.0   |               |        |
| 31    | 432.589       | 1.442  | 1.6   |               |        |
| 32    | 427.095       | 1.423  | 1.2   |               |        |
| 33    | 405.394       | 1.351  | 0.9   |               |        |
| 34    | 384.516       | 1.282  | 5.2   |               |        |
| 35    | 378.473       | 1.261  | 1.4   |               |        |
| 36    | 272.163       | 0.907  | 1.1   |               |        |
| 37    | 264.197       | 0.881  | 0.9   |               |        |
| 38    | 226.837       | 0.756  | 30.4  |               |        |
| 39    | 7.350         | 0.024  | 1.5   |               |        |

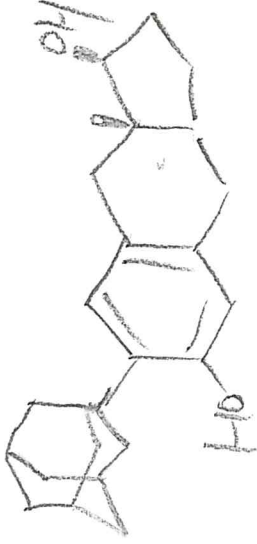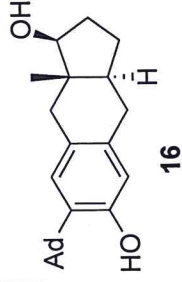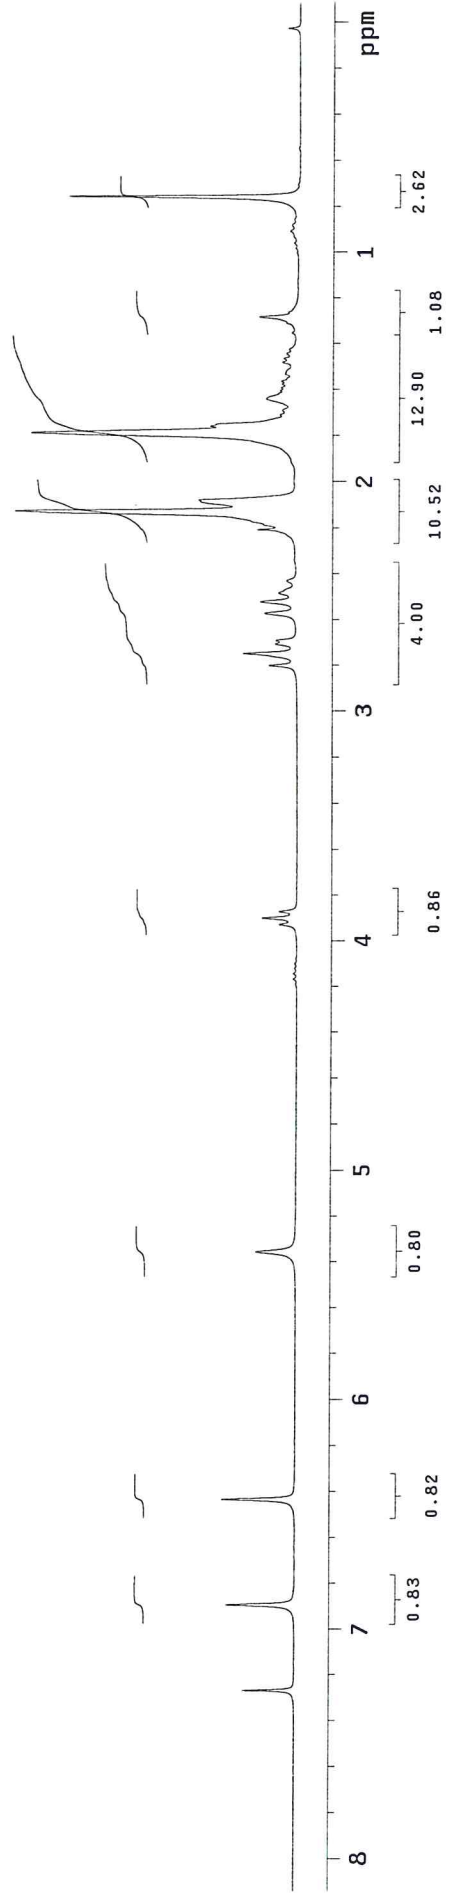



| INDEX | FREQUENCY | PPM     | HEIGHT |
|-------|-----------|---------|--------|
| 1     | 11509.454 | 152.550 | 6.8    |
| 2     | 10154.689 | 134.594 | 7.5    |
| 3     | 10123.769 | 134.184 | 7.5    |
| 4     | 9698.901  | 128.553 | 17.6   |
| 5     | 9638.206  | 127.748 | 7.3    |
| 6     | 8833.134  | 117.077 | 15.0   |
| 7     | 6187.734  | 82.014  | 16.3   |
| 8     | 5855.628  | 77.612  | 12.1   |
| 9     | 5823.562  | 77.187  | 12.9   |
| 10    | 5791.497  | 76.762  | 13.7   |
| 11    | 3430.105  | 45.464  | 5.8    |
| 12    | 3229.696  | 42.807  | 12.0   |
| 13    | 3180.453  | 42.155  | 17.1   |
| 14    | 3112.886  | 41.259  | 14.4   |
| 15    | 3084.256  | 40.880  | 53.3   |
| 16    | 2812.845  | 37.282  | 47.6   |
| 17    | 2754.440  | 36.508  | 9.6    |
| 18    | 2733.827  | 36.235  | 9.2    |
| 19    | 2369.655  | 31.408  | 15.7   |
| 20    | 2328.428  | 30.862  | 17.9   |
| 21    | 2208.182  | 29.268  | 60.2   |
| 22    | 1940.207  | 25.716  | 18.9   |
| 23    | 764.092   | 10.128  | 19.9   |

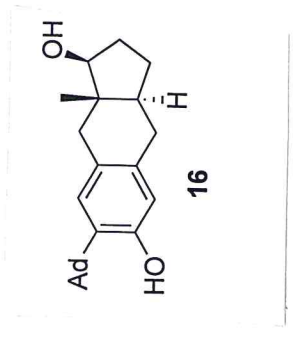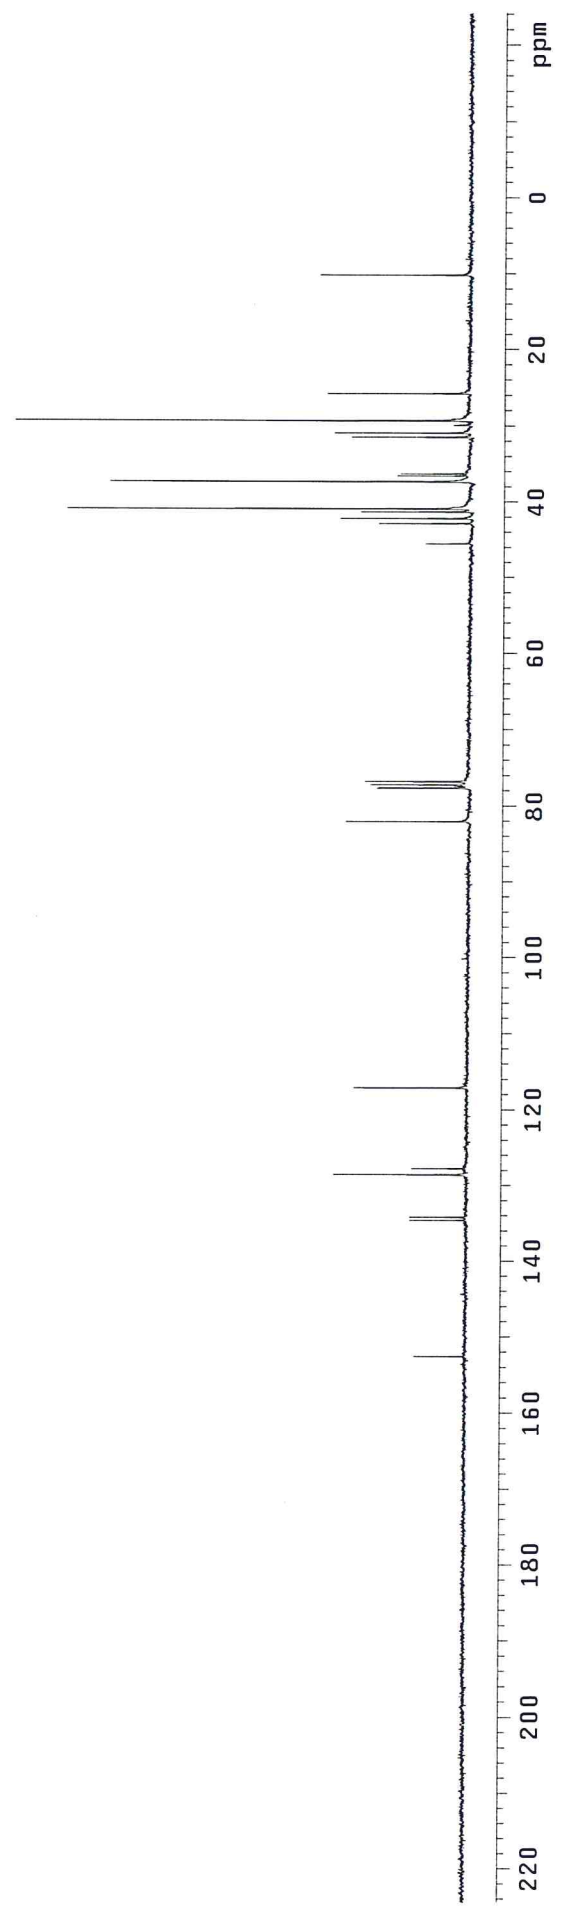

M&1022

| INDEX | FREQUENCY PPM | HEIGHT | INDEX | FREQUENCY PPM | HEIGHT |
|-------|---------------|--------|-------|---------------|--------|
| 1     | 2179.489      | 7.264  | 40    | -0.000        | -0.000 |
| 2     | 2178.940      | 7.262  |       |               | 9.8    |
| 3     | 2099.001      | 6.996  |       |               |        |
| 4     | 2090.211      | 6.966  |       |               |        |
| 5     | 2005.603      | 6.684  |       |               |        |
| 6     | 1999.010      | 6.662  |       |               |        |
| 7     | 1474.328      | 4.914  |       |               |        |
| 8     | 881.245       | 2.937  |       |               |        |
| 9     | 872.730       | 2.909  |       |               |        |
| 10    | 868.609       | 2.895  |       |               |        |
| 11    | 809.273       | 2.697  |       |               |        |
| 12    | 800.758       | 2.669  |       |               |        |
| 13    | 791.143       | 2.637  |       |               |        |
| 14    | 781.803       | 2.606  |       |               |        |
| 15    | 738.950       | 2.463  |       |               |        |
| 16    | 729.884       | 2.433  |       |               |        |
| 17    | 724.116       | 2.413  |       |               |        |
| 18    | 720.270       | 2.401  |       |               |        |
| 19    | 713.677       | 2.379  |       |               |        |
| 20    | 704.337       | 2.347  |       |               |        |
| 21    | 694.722       | 2.315  |       |               |        |
| 22    | 686.207       | 2.287  |       |               |        |
| 23    | 595.830       | 1.986  |       |               |        |
| 24    | 592.533       | 1.975  |       |               |        |
| 25    | 589.786       | 1.966  |       |               |        |
| 26    | 583.193       | 1.944  |       |               |        |
| 27    | 577.150       | 1.924  |       |               |        |
| 28    | 574.403       | 1.914  |       |               |        |
| 29    | 564.788       | 1.882  |       |               |        |
| 30    | 562.041       | 1.873  |       |               |        |
| 31    | 552.427       | 1.841  |       |               |        |
| 32    | 543.361       | 1.811  |       |               |        |
| 33    | 538.966       | 1.796  |       |               |        |
| 34    | 534.296       | 1.781  |       |               |        |
| 35    | 529.901       | 1.766  |       |               |        |
| 36    | 520.836       | 1.736  |       |               |        |
| 37    | 493.091       | 1.643  |       |               |        |
| 38    | 218.114       | 0.727  |       |               |        |
| 39    | 0.824         | 0.003  |       |               |        |

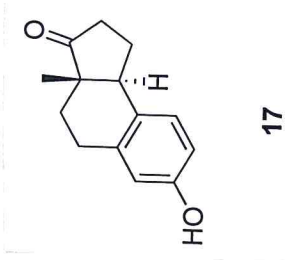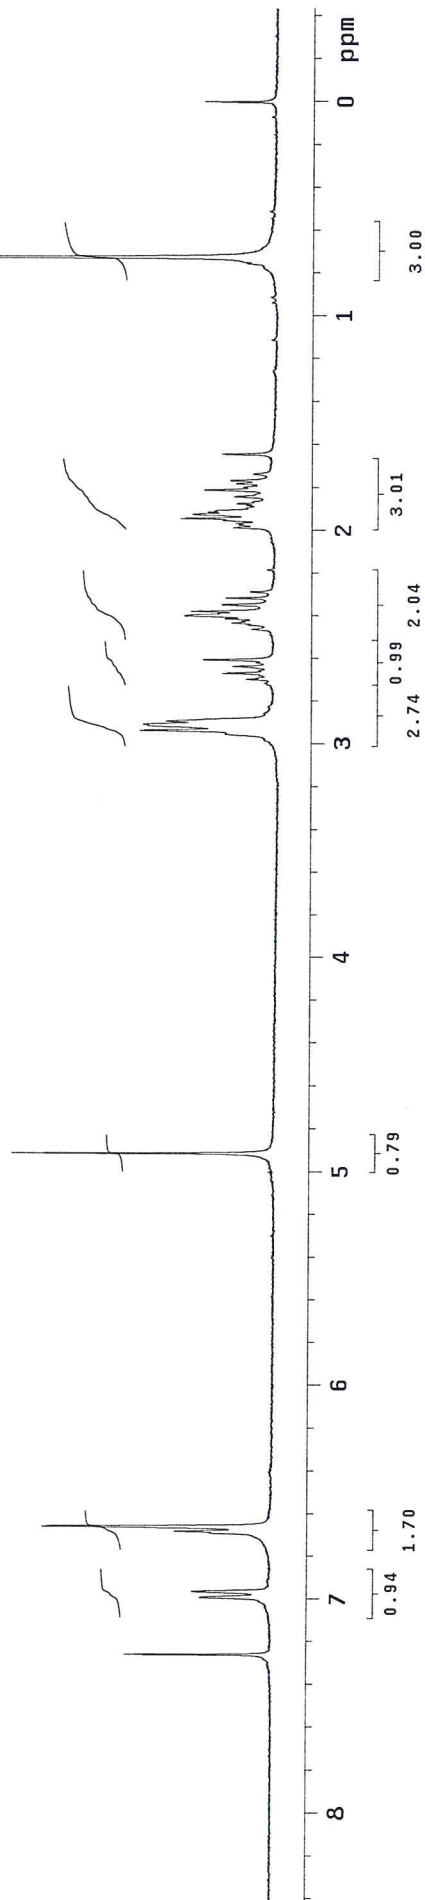

| INDEX | FREQUENCY | PPM     | HEIGHT |
|-------|-----------|---------|--------|
| 1     | 16659.168 | 220.806 | 3.1    |
| 2     | 11640.924 | 154.293 | 5.0    |
| 3     | 10433.889 | 138.294 | 4.2    |
| 4     | 9828.081  | 130.265 | 4.8    |
| 5     | 9537.201  | 126.409 | 14.6   |
| 6     | 8709.226  | 115.435 | 13.3   |
| 7     | 8524.849  | 112.991 | 17.1   |
| 8     | 7560.595  | 100.211 | -2.7   |
| 9     | 5857.691  | 77.640  | 29.6   |
| 10    | 5825.625  | 77.215  | 30.4   |
| 11    | 5793.560  | 76.790  | 27.3   |
| 12    | 3638.303  | 48.223  | 5.3    |
| 13    | 3481.411  | 46.144  | 11.8   |
| 14    | 2771.391  | 36.733  | 20.7   |
| 15    | 2185.051  | 28.961  | 15.5   |
| 16    | 2013.272  | 26.685  | 18.2   |
| 17    | 1633.067  | 21.645  | 18.5   |
| 18    | 1063.905  | 14.101  | 19.9   |

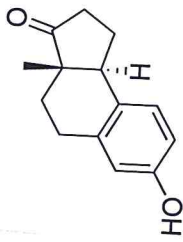

17

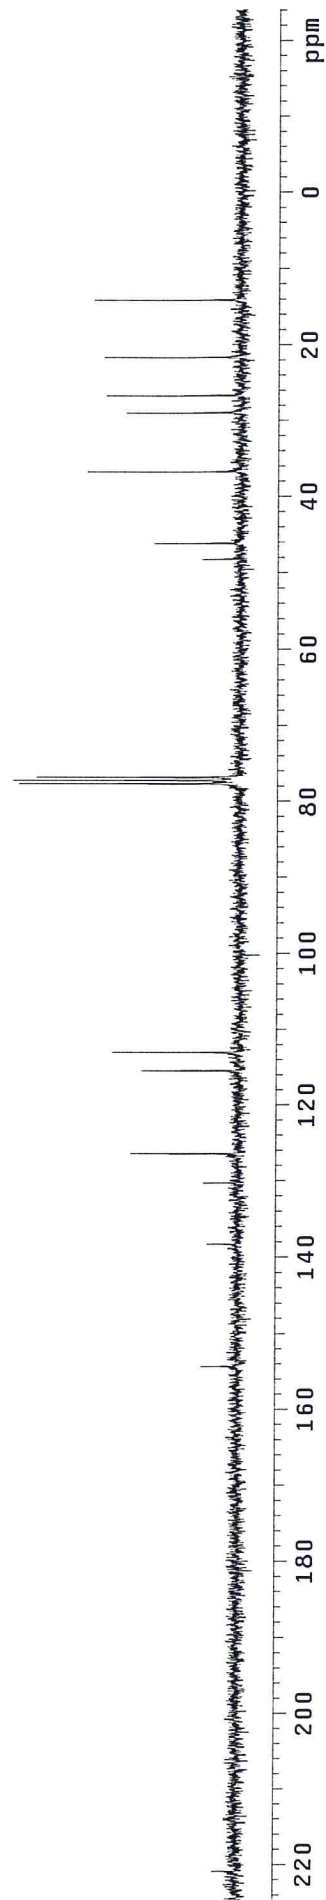

103D

| INDEX | FREQUENCY PPM | HEIGHT | INDEX | FREQUENCY PPM | HEIGHT |
|-------|---------------|--------|-------|---------------|--------|
| 1     | 2181.345      | 7.270  | 58.8  |               |        |
| 2     | 2078.332      | 6.927  | 21.9  |               |        |
| 3     | 1942.354      | 6.473  | 24.6  |               |        |
| 4     | 1408.607      | 4.695  | 29.3  |               |        |
| 5     | 884.475       | 2.948  | 9.1   |               |        |
| 6     | 878.431       | 2.928  | 10.4  |               |        |
| 7     | 867.443       | 2.891  | 16.3  |               |        |
| 8     | 862.499       | 2.875  | 15.2  |               |        |
| 9     | 858.103       | 2.860  | 15.1  |               |        |
| 10    | 809.756       | 2.699  | 7.3   |               |        |
| 11    | 801.789       | 2.672  | 7.5   |               |        |
| 12    | 791.900       | 2.639  | 8.7   |               |        |
| 13    | 782.560       | 2.608  | 8.3   |               |        |
| 14    | 728.719       | 2.429  | 8.6   |               |        |
| 15    | 722.400       | 2.408  | 10.6  |               |        |
| 16    | 720.203       | 2.400  | 9.2   |               |        |
| 17    | 711.687       | 2.372  | 9.1   |               |        |
| 18    | 703.171       | 2.344  | 8.3   |               |        |
| 19    | 692.733       | 2.309  | 7.8   |               |        |
| 20    | 683.942       | 2.279  | 5.9   |               |        |
| 21    | 640.264       | 2.134  | 100.0 |               |        |
| 22    | 630.925       | 2.103  | 34.3  |               |        |
| 23    | 617.464       | 2.058  | 12.7  |               |        |
| 24    | 600.433       | 2.001  | 11.1  |               |        |
| 25    | 590.818       | 1.969  | 14.6  |               |        |
| 26    | 581.753       | 1.939  | 15.1  |               |        |
| 27    | 579.281       | 1.931  | 14.1  |               |        |
| 28    | 566.919       | 1.889  | 11.2  |               |        |
| 29    | 538.350       | 1.794  | 84.5  |               |        |
| 30    | 527.911       | 1.759  | 10.0  |               |        |
| 31    | 518.846       | 1.729  | 6.8   |               |        |
| 32    | 477.915       | 1.593  | 30.8  |               |        |
| 33    | 388.362       | 1.294  | 6.5   |               |        |
| 34    | 381.220       | 1.271  | 11.3  |               |        |
| 35    | 374.078       | 1.247  | 4.7   |               |        |
| 36    | 228.211       | 0.761  | 76.4  |               |        |
| 37    | 23.832        | 0.079  | 3.8   |               |        |
| 38    | 24.382        | 0.081  | 3.9   |               |        |
| 39    | 2.955         | 0.010  | 10.7  |               |        |

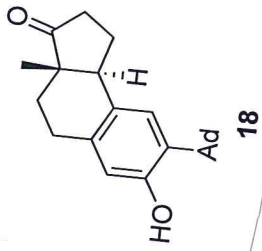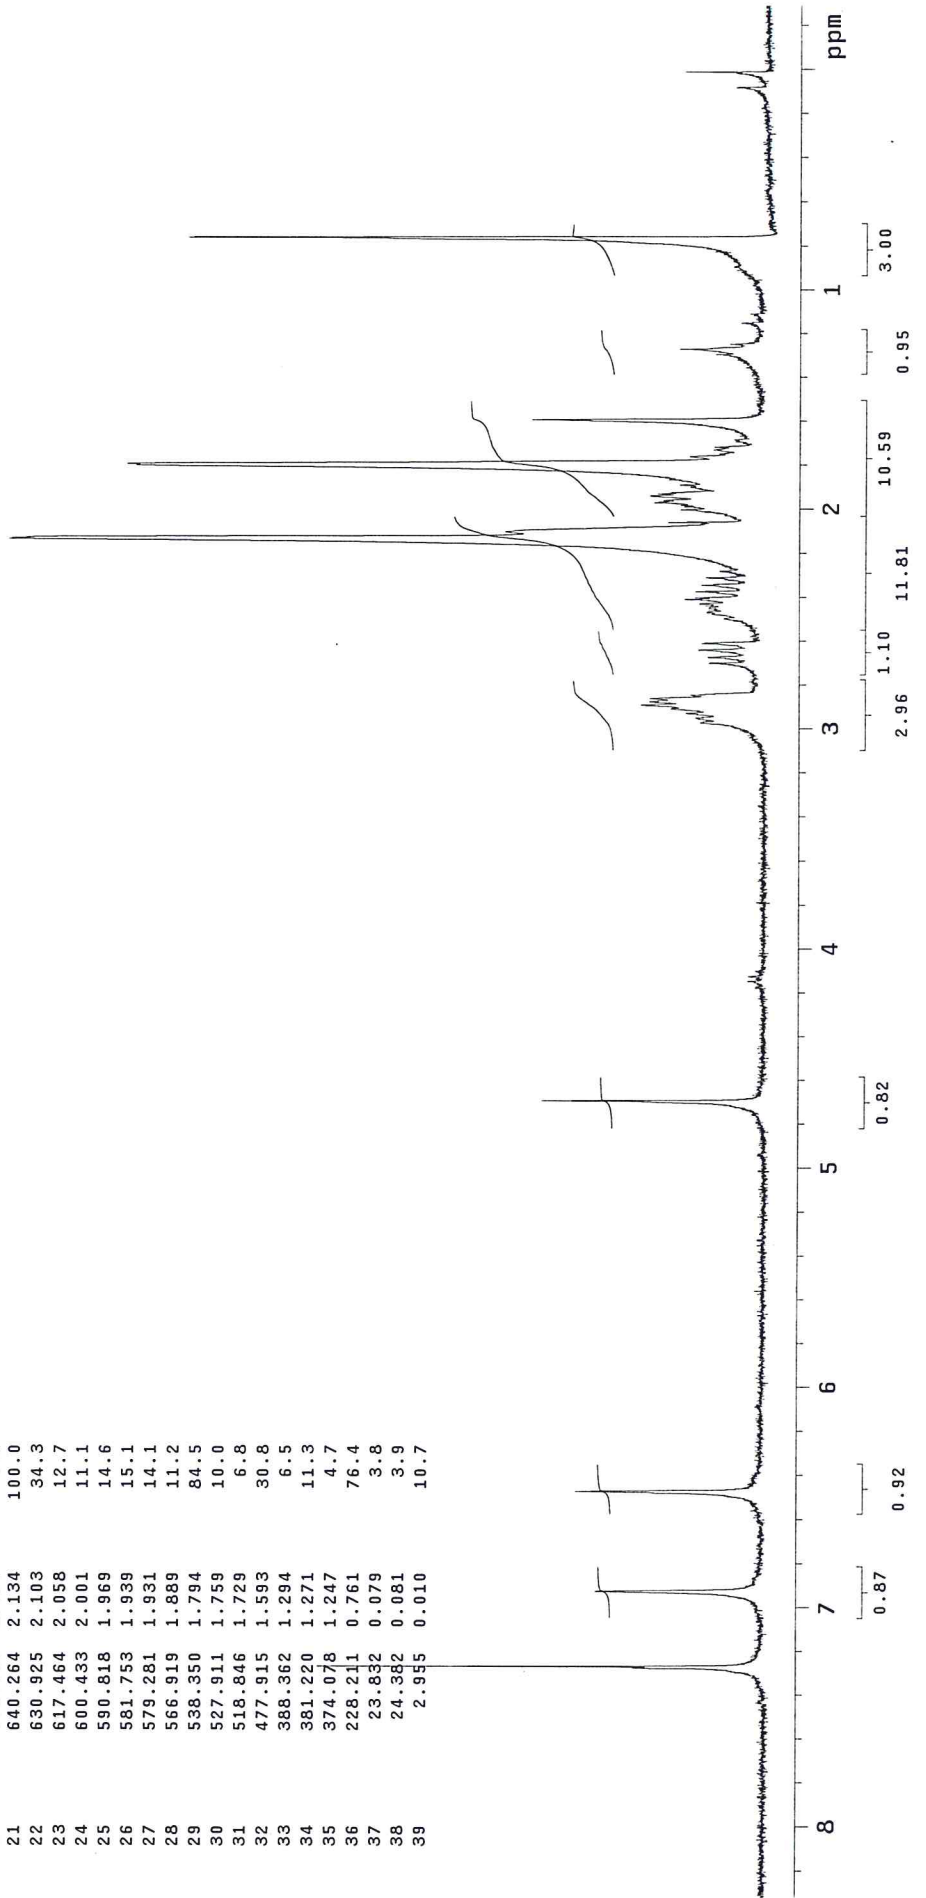

MQ 1030

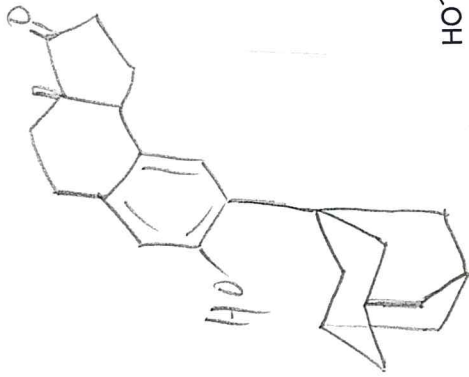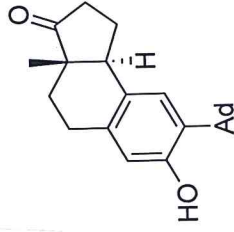

18

| INDEX | FREQUENCY | PPM     | HEIGHT |
|-------|-----------|---------|--------|
| 1     | 16699.250 | 221.338 | 5.6    |
| 2     | 11561.906 | 153.245 | 8.2    |
| 3     | 10155.607 | 134.606 | 8.4    |
| 4     | 10133.848 | 134.317 | 7.4    |
| 5     | 9758.224  | 129.339 | 6.9    |
| 6     | 9326.486  | 123.616 | 16.9   |
| 7     | 8811.148  | 116.786 | 17.4   |
| 8     | 5856.546  | 77.625  | 7.7    |
| 9     | 5824.480  | 77.200  | 8.5    |
| 10    | 5792.415  | 76.775  | 7.8    |
| 11    | 3639.449  | 48.238  | 8.4    |
| 12    | 3502.025  | 46.417  | 17.9   |
| 13    | 3081.739  | 40.846  | 55.1   |
| 14    | 2811.473  | 37.264  | 58.5   |
| 15    | 2771.391  | 36.733  | 23.1   |
| 16    | 2766.810  | 36.672  | 14.4   |
| 17    | 2207.955  | 29.265  | 66.0   |
| 18    | 2195.358  | 29.098  | 20.2   |
| 19    | 1951.432  | 25.865  | 17.3   |
| 20    | 1635.358  | 21.676  | 19.1   |
| 21    | 1043.292  | 13.828  | 19.5   |

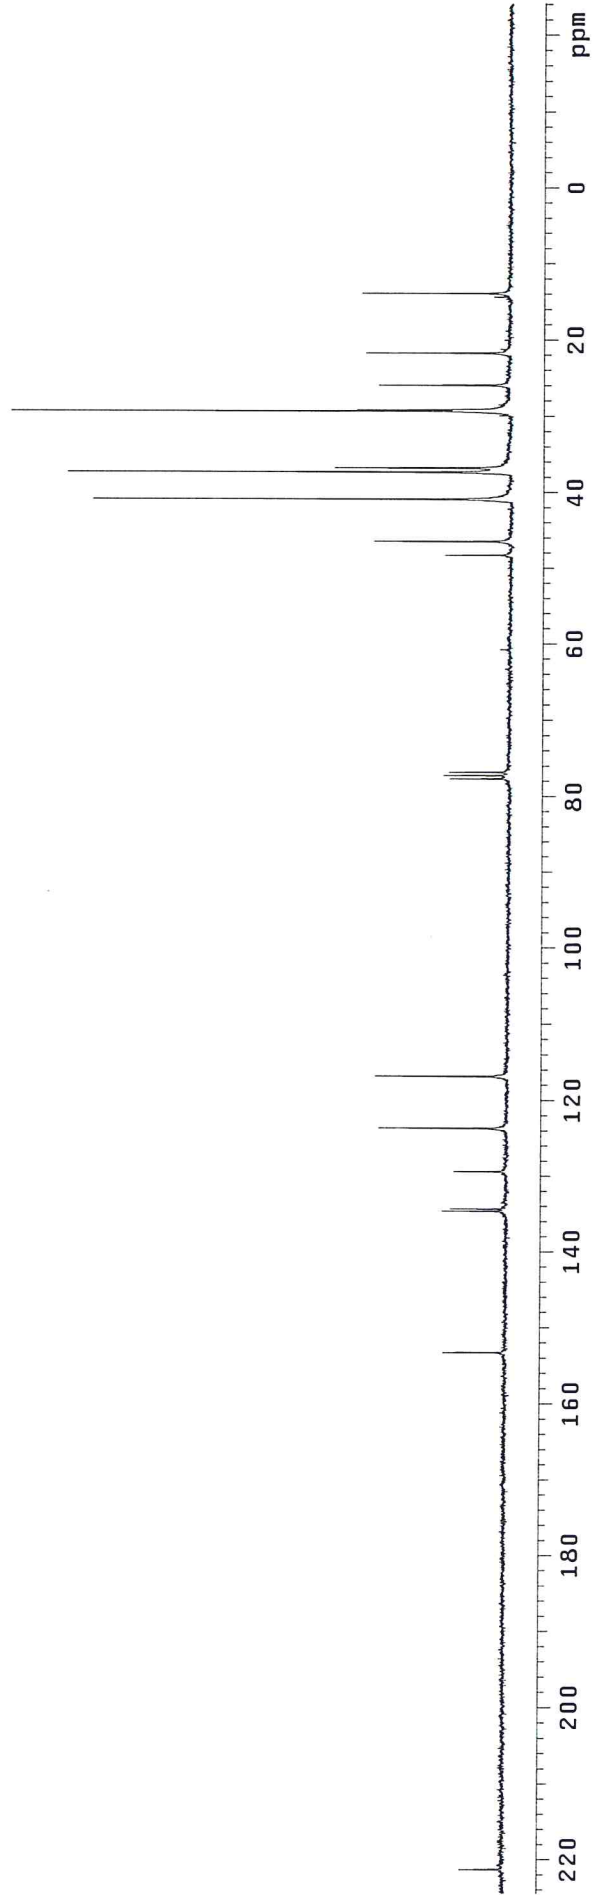

| INDEX | FREQUENCY PPM | HEIGHT |
|-------|---------------|--------|-------|---------------|--------|-------|---------------|--------|-------|---------------|--------|
| 1     | 2180.588      | 7.267  | 40    | 626.871       | 2.089  | 79    | 249.430       | 0.831  | 79    | 249.430       | 0.831  |
| 2     | 2180.039      | 7.266  | 41    | 616.432       | 2.054  | 80    | 199.159       | 0.664  | 80    | 199.159       | 0.664  |
| 3     | 2178.116      | 7.259  | 42    | 609.839       | 2.032  | 81    | 193.665       | 0.645  | 81    | 193.665       | 0.645  |
| 4     | 2175.369      | 7.250  | 43    | 601.598       | 2.005  | 82    | 193.116       | 0.644  | 82    | 193.116       | 0.644  |
| 5     | 2174.819      | 7.248  | 44    | 597.753       | 1.992  | 83    | 166.744       | 0.556  | 83    | 166.744       | 0.556  |
| 6     | 2057.521      | 6.857  | 45    | 596.654       | 1.989  | 84    | 167.294       | 0.558  | 84    | 167.294       | 0.558  |
| 7     | 2056.422      | 6.854  | 46    | 592.533       | 1.975  | 85    | 130.209       | 0.434  | 85    | 130.209       | 0.434  |
| 8     | 2049.280      | 6.830  | 47    | 589.237       | 1.964  | 86    | 21.427        | 0.071  | 86    | 21.427        | 0.071  |
| 9     | 2048.181      | 6.826  | 48    | 584.567       | 1.948  | 87    | -0.000        | -0.000 | 87    | -0.000        | -0.000 |
| 10    | 1986.923      | 6.622  | 49    | 579.897       | 1.933  |       |               |        |       |               |        |
| 11    | 1979.780      | 6.598  | 50    | 522.484       | 1.741  |       |               |        |       |               |        |
| 12    | 1977.308      | 6.590  | 51    | 515.616       | 1.718  |       |               |        |       |               |        |
| 13    | 1898.469      | 6.327  | 52    | 510.397       | 1.701  |       |               |        |       |               |        |
| 14    | 1588.329      | 5.294  | 53    | 506.002       | 1.686  |       |               |        |       |               |        |
| 15    | 1250.171      | 4.167  | 54    | 503.804       | 1.679  |       |               |        |       |               |        |
| 16    | 1242.754      | 4.142  | 55    | 502.156       | 1.674  |       |               |        |       |               |        |
| 17    | 1235.612      | 4.118  | 56    | 499.134       | 1.664  |       |               |        |       |               |        |
| 18    | 1228.469      | 4.094  | 57    | 497.211       | 1.657  |       |               |        |       |               |        |
| 19    | 1177.649      | 3.925  | 58    | 492.541       | 1.642  |       |               |        |       |               |        |
| 20    | 1173.804      | 3.912  | 59    | 488.696       | 1.629  |       |               |        |       |               |        |
| 21    | 1170.232      | 3.900  | 60    | 487.597       | 1.625  |       |               |        |       |               |        |
| 22    | 1168.584      | 3.895  | 61    | 477.433       | 1.591  |       |               |        |       |               |        |
| 23    | 1161.442      | 3.871  | 62    | 468.093       | 1.560  |       |               |        |       |               |        |
| 24    | 869.159       | 2.897  | 63    | 464.797       | 1.549  |       |               |        |       |               |        |
| 25    | 864.763       | 2.882  | 64    | 455.457       | 1.518  |       |               |        |       |               |        |
| 26    | 860.093       | 2.867  | 65    | 385.682       | 1.285  |       |               |        |       |               |        |
| 27    | 855.423       | 2.851  | 66    | 383.210       | 1.277  |       |               |        |       |               |        |
| 28    | 776.309       | 2.587  | 67    | 378.540       | 1.262  |       |               |        |       |               |        |
| 29    | 768.892       | 2.563  | 68    | 376.342       | 1.254  |       |               |        |       |               |        |
| 30    | 757.629       | 2.525  | 69    | 371.398       | 1.238  |       |               |        |       |               |        |
| 31    | 709.007       | 2.363  | 70    | 369.200       | 1.230  |       |               |        |       |               |        |
| 32    | 705.436       | 2.351  | 71    | 336.236       | 1.121  |       |               |        |       |               |        |
| 33    | 698.019       | 2.326  | 72    | 313.435       | 1.045  |       |               |        |       |               |        |
| 34    | 696.371       | 2.321  | 73    | 310.963       | 1.036  |       |               |        |       |               |        |
| 35    | 691.426       | 2.304  | 74    | 293.108       | 0.977  |       |               |        |       |               |        |
| 36    | 688.679       | 2.295  | 75    | 286.515       | 0.955  |       |               |        |       |               |        |
| 37    | 687.031       | 2.290  | 76    | 280.196       | 0.934  |       |               |        |       |               |        |
| 38    | 679.339       | 2.264  | 77    | 265.088       | 0.883  |       |               |        |       |               |        |
| 39    | 674.669       | 2.249  | 78    | 255.473       | 0.851  |       |               |        |       |               |        |

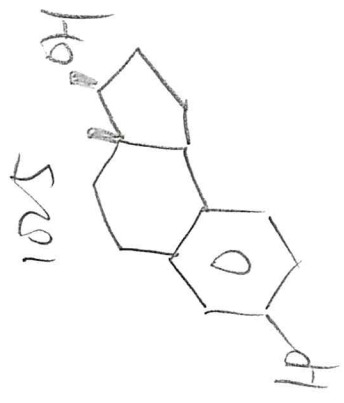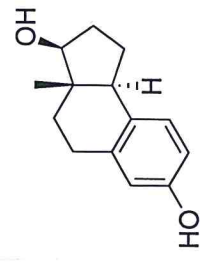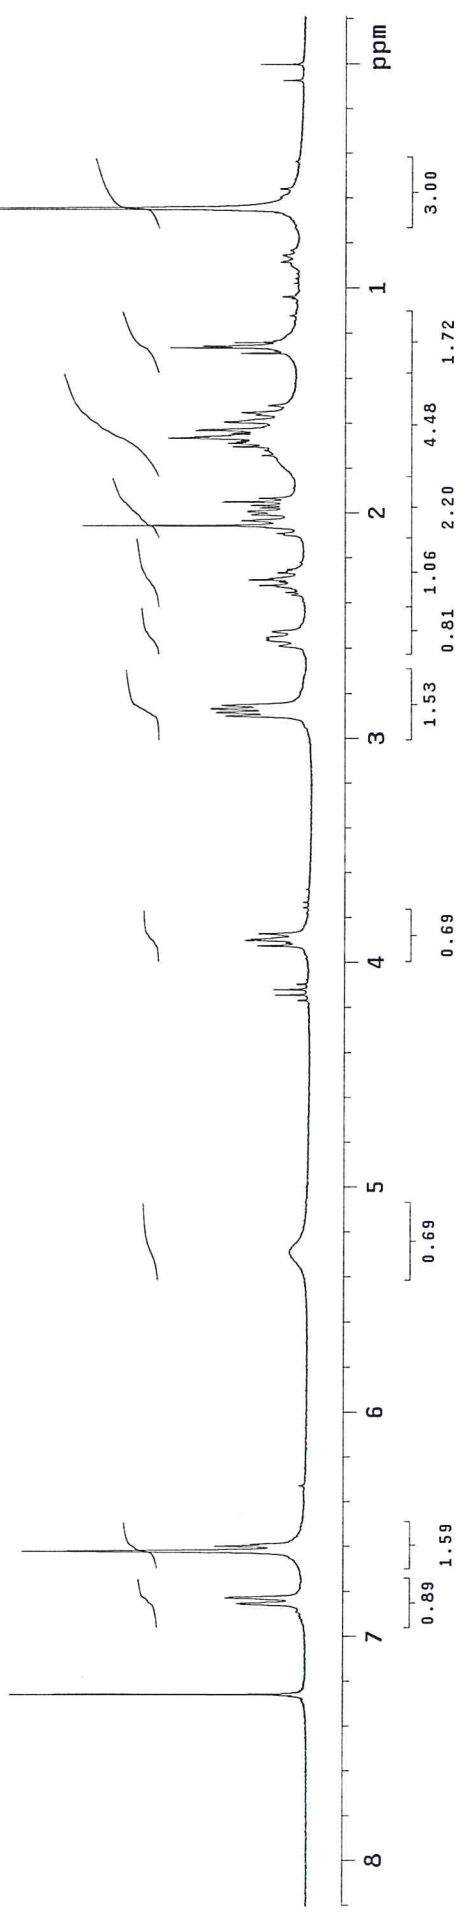

8 7 6 5 4 3 2 1 ppm

| INDEX | FREQUENCY | PPM     | HEIGHT |
|-------|-----------|---------|--------|
| 1     | 11604.278 | 153.807 | 4.6    |
| 2     | 10394.952 | 137.778 | 4.2    |
| 3     | 9947.181  | 131.843 | 4.4    |
| 4     | 9566.977  | 126.804 | 13.8   |
| 5     | 8692.048  | 115.207 | 15.3   |
| 6     | 8506.526  | 112.748 | 16.1   |
| 7     | 6135.973  | 81.328  | 14.9   |
| 8     | 5857.691  | 77.640  | 24.5   |
| 9     | 5825.625  | 77.215  | 24.9   |
| 10    | 5793.560  | 76.790  | 24.6   |
| 11    | 3453.927  | 45.780  | 15.9   |
| 12    | 3278.712  | 43.457  | 5.1    |
| 13    | 2558.384  | 33.910  | 14.0   |
| 14    | 2369.427  | 31.405  | 17.1   |
| 15    | 2039.611  | 27.034  | 17.1   |
| 16    | 1761.329  | 23.345  | 16.8   |
| 17    | 808.527   | 10.716  | 12.4   |

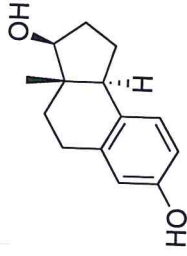

19

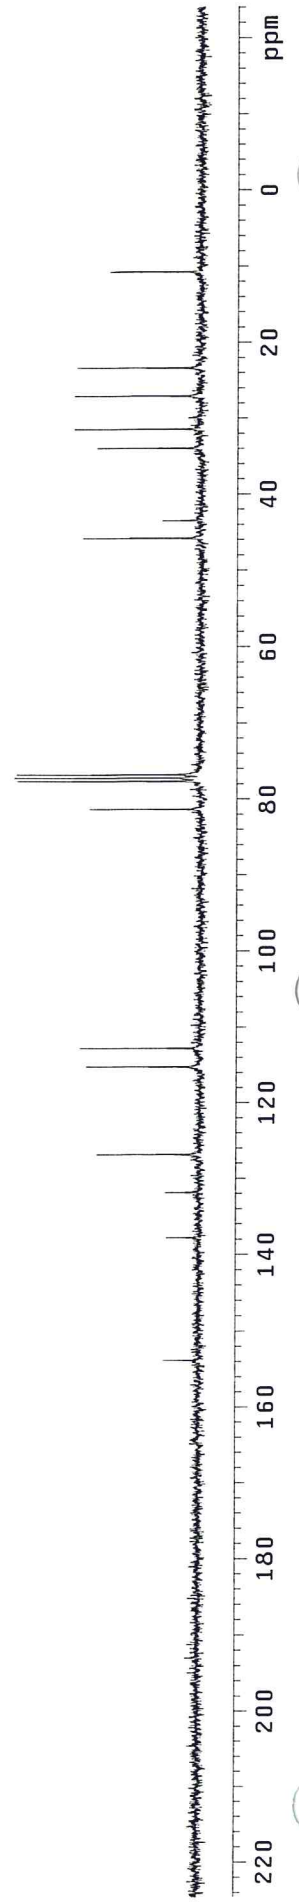

1031

| INDEX | FREQUENCY PPM | HEIGHT | INDEX | FREQUENCY PPM | HEIGHT |
|-------|---------------|--------|-------|---------------|--------|
| 1     | 2181.345      | 7.270  | 40    | 269.141       | 0.897  |
| 2     | 2040.148      | 6.799  | 41    | 201.565       | 0.672  |
| 3     | 1933.838      | 6.445  | 42    | 25.480        | 0.085  |
| 4     | 1425.364      | 4.750  | 43    | 4.054         | 0.014  |
| 5     | 1174.835      | 3.915  |       |               |        |
| 6     | 1167.693      | 3.892  |       |               |        |
| 7     | 1158.628      | 3.861  |       |               |        |
| 8     | 856.181       | 2.853  |       |               |        |
| 9     | 852.060       | 2.840  |       |               |        |
| 10    | 846.841       | 2.822  |       |               |        |
| 11    | 842.445       | 2.808  |       |               |        |
| 12    | 782.286       | 2.607  |       |               |        |
| 13    | 774.594       | 2.582  |       |               |        |
| 14    | 763.606       | 2.545  |       |               |        |
| 15    | 708.665       | 2.362  |       |               |        |
| 16    | 699.600       | 2.332  |       |               |        |
| 17    | 691.634       | 2.305  |       |               |        |
| 18    | 682.843       | 2.276  |       |               |        |
| 19    | 678.448       | 2.261  |       |               |        |
| 20    | 632.573       | 2.108  |       |               |        |
| 21    | 626.529       | 2.088  |       |               |        |
| 22    | 598.510       | 1.995  |       |               |        |
| 23    | 594.114       | 1.980  |       |               |        |
| 24    | 590.269       | 1.967  |       |               |        |
| 25    | 586.148       | 1.954  |       |               |        |
| 26    | 581.478       | 1.938  |       |               |        |
| 27    | 534.229       | 1.780  |       |               |        |
| 28    | 520.769       | 1.736  |       |               |        |
| 29    | 515.824       | 1.719  |       |               |        |
| 30    | 508.682       | 1.695  |       |               |        |
| 31    | 498.518       | 1.661  |       |               |        |
| 32    | 491.925       | 1.639  |       |               |        |
| 33    | 480.113       | 1.600  |       |               |        |
| 34    | 470.224       | 1.567  |       |               |        |
| 35    | 458.137       | 1.527  |       |               |        |
| 36    | 447.973       | 1.493  |       |               |        |
| 37    | 402.372       | 1.341  |       |               |        |
| 38    | 380.671       | 1.269  |       |               |        |
| 39    | 371.605       | 1.238  |       |               |        |

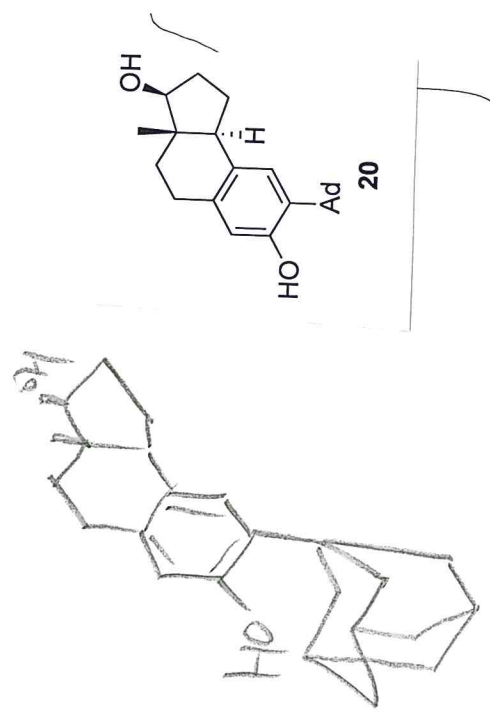

20

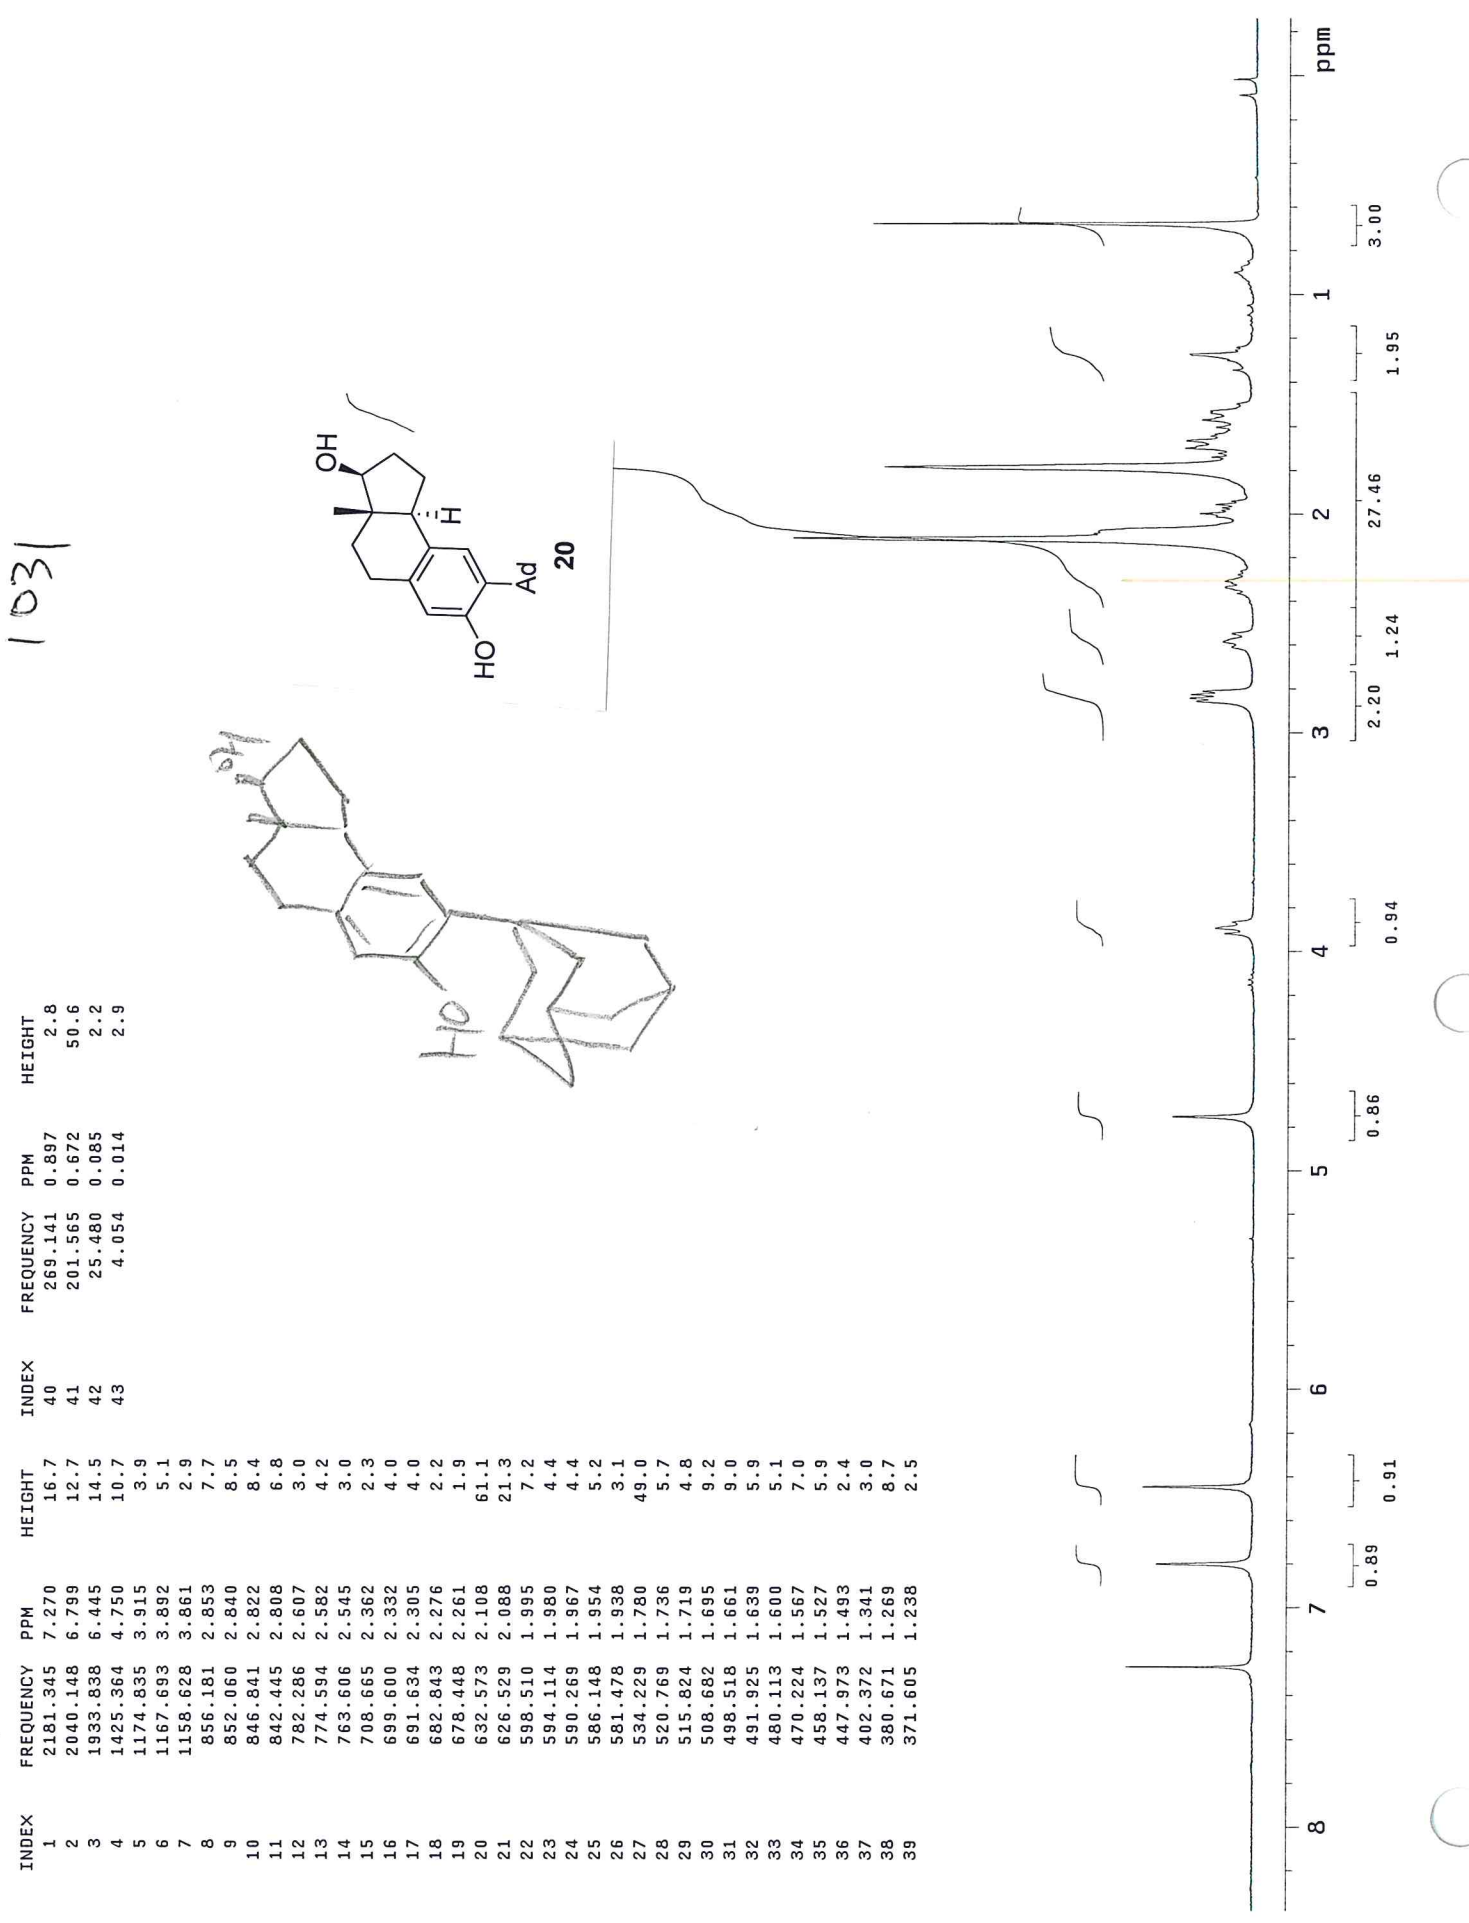



| INDEX | FREQUENCY | PPM     | HEIGHT |
|-------|-----------|---------|--------|
| 1     | 11497.775 | 152.395 | 4.4    |
| 2     | 10143.009 | 134.439 | 4.4    |
| 3     | 10104.073 | 133.923 | 4.3    |
| 4     | 9920.842  | 131.494 | 5.2    |
| 5     | 9371.148  | 124.208 | 11.7   |
| 6     | 8801.986  | 116.665 | 11.8   |
| 7     | 6131.392  | 81.268  | 11.8   |
| 8     | 5856.545  | 77.625  | 19.1   |
| 9     | 5824.480  | 77.200  | 20.4   |
| 10    | 5792.415  | 76.775  | 19.7   |
| 11    | 3474.540  | 46.053  | 13.7   |
| 12    | 3279.857  | 43.472  | 5.2    |
| 13    | 3092.045  | 40.983  | 47.5   |
| 14    | 2816.053  | 37.325  | 44.5   |
| 15    | 2764.520  | 36.642  | 4.8    |
| 16    | 2566.401  | 34.016  | 13.6   |
| 17    | 2376.298  | 31.496  | 16.0   |
| 18    | 2211.390  | 29.311  | 44.4   |
| 19    | 1983.497  | 26.290  | 14.2   |
| 20    | 1763.619  | 23.376  | 13.7   |
| 21    | 805.091   | 10.671  | 14.3   |

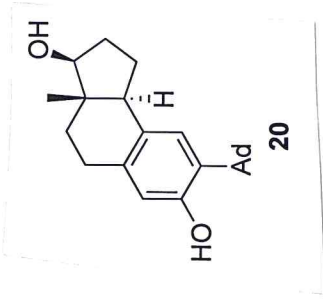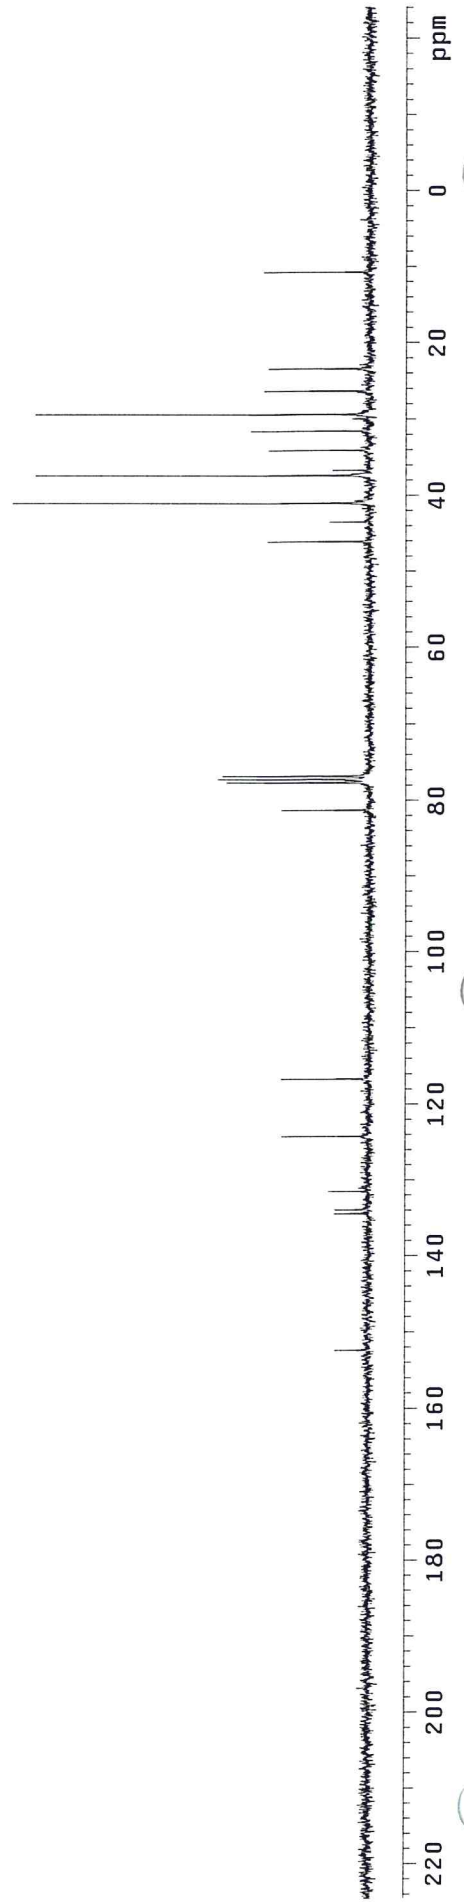

| INDEX | FREQUENCY PPM | HEIGHT | INDEX | FREQUENCY PPM | HEIGHT |
|-------|---------------|--------|-------|---------------|--------|
| 1     | 2481.533      | 8.270  | 40    | 362.204       | 1.207  |
| 2     | 2432.087      | 8.106  | 41    | 356.435       | 1.188  |
| 3     | 2079.643      | 6.931  | 42    | 350.941       | 1.170  |
| 4     | 2071.128      | 6.903  | 43    | 345.447       | 1.151  |
| 5     | 2007.397      | 6.690  | 44    | 336.656       | 1.122  |
| 6     | 2005.199      | 6.683  | 45    | 329.514       | 1.098  |
| 7     | 2000.804      | 6.668  | 46    | 245.730       | 0.819  |
| 8     | 1998.881      | 6.662  | 47    | 242.433       | 0.808  |
| 9     | 1977.729      | 6.591  | 48    | 181.449       | 0.605  |
| 10    | 1607.979      | 5.359  | 49    | 161.946       | 0.540  |
| 11    | 1110.218      | 3.700  | 50    | 117.993       | 0.393  |
| 12    | 1101.153      | 3.670  |       |               |        |
| 13    | 1092.637      | 3.642  |       |               |        |
| 14    | 932.486       | 3.108  |       |               |        |
| 15    | 608.337       | 2.027  |       |               |        |
| 16    | 604.217       | 2.014  |       |               |        |
| 17    | 597.898       | 1.993  |       |               |        |
| 18    | 595.701       | 1.985  |       |               |        |
| 19    | 593.778       | 1.979  |       |               |        |
| 20    | 591.580       | 1.972  |       |               |        |
| 21    | 570.428       | 1.901  |       |               |        |
| 22    | 567.681       | 1.892  |       |               |        |
| 23    | 562.462       | 1.875  |       |               |        |
| 24    | 558.341       | 1.861  |       |               |        |
| 25    | 549.551       | 1.832  |       |               |        |
| 26    | 539.936       | 1.799  |       |               |        |
| 27    | 535.541       | 1.785  |       |               |        |
| 28    | 466.591       | 1.555  |       |               |        |
| 29    | 455.053       | 1.517  |       |               |        |
| 30    | 449.559       | 1.498  |       |               |        |
| 31    | 446.263       | 1.487  |       |               |        |
| 32    | 439.395       | 1.464  |       |               |        |
| 33    | 434.176       | 1.447  |       |               |        |
| 34    | 429.780       | 1.432  |       |               |        |
| 35    | 420.990       | 1.403  |       |               |        |
| 36    | 417.144       | 1.390  |       |               |        |
| 37    | 408.079       | 1.360  |       |               |        |
| 38    | 404.233       | 1.347  |       |               |        |
| 39    | 373.192       | 1.244  |       |               |        |

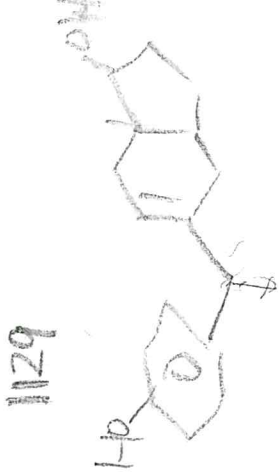

in acetone-d<sub>6</sub>

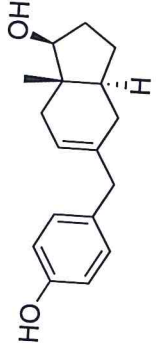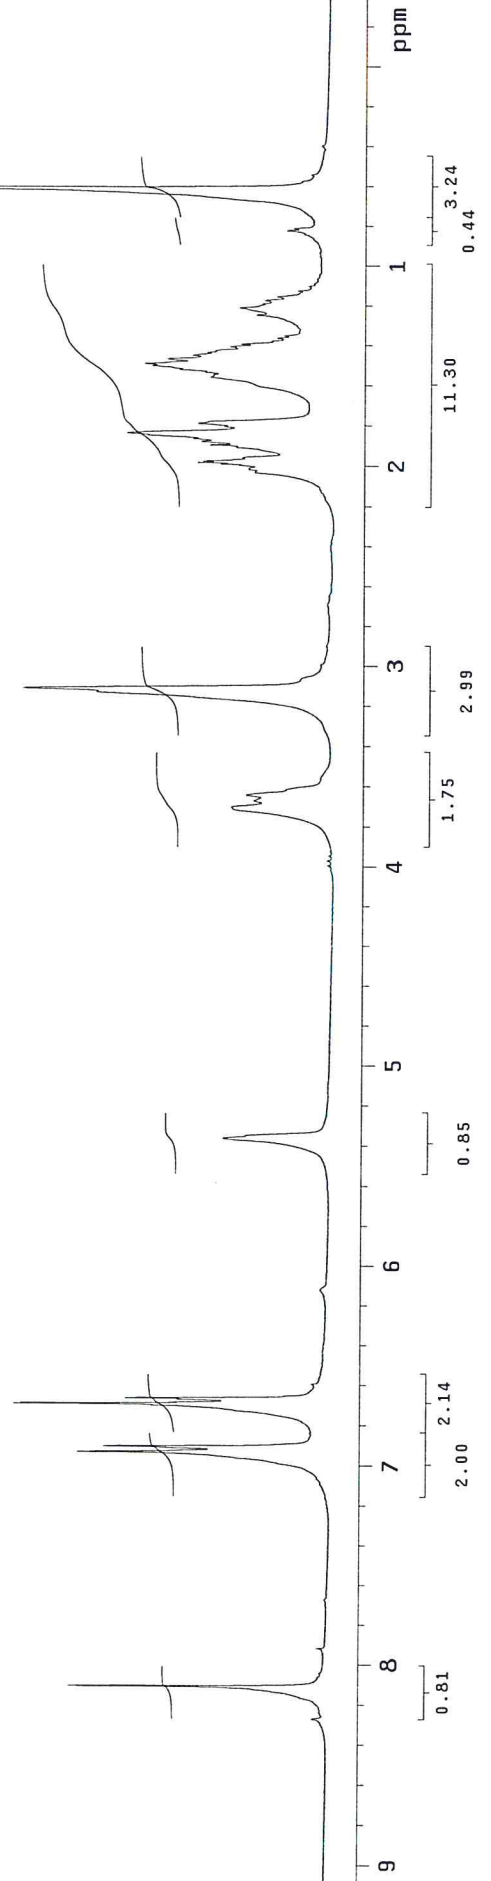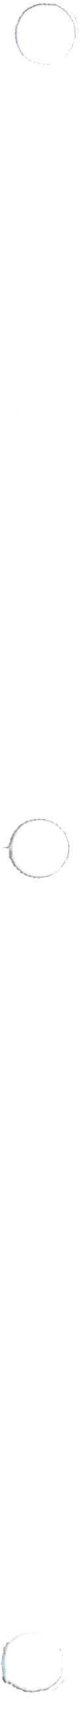

11209

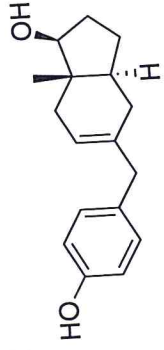

21

| INDEX | FREQUENCY | PPM     | HEIGHT |
|-------|-----------|---------|--------|
| 1     | 15523.393 | 205.751 | 35.2   |
| 2     | 11753.412 | 155.783 | 5.3    |
| 3     | 10351.693 | 137.204 | 7.8    |
| 4     | 9898.196  | 131.193 | 6.2    |
| 5     | 9783.677  | 129.676 | 37.0   |
| 6     | 9180.159  | 121.676 | 18.2   |
| 7     | 8690.016  | 115.180 | 36.0   |
| 8     | 6109.892  | 80.982  | 16.1   |
| 9     | 3266.373  | 43.293  | 18.9   |
| 10    | 3142.692  | 41.654  | 9.4    |
| 11    | 3115.208  | 41.290  | 18.9   |
| 12    | 2911.363  | 38.588  | 19.3   |
| 13    | 2341.056  | 31.029  | 19.5   |
| 14    | 2292.958  | 30.391  | 17.7   |
| 15    | 2237.988  | 29.663  | 9.8    |
| 16    | 2218.520  | 29.405  | 18.5   |
| 17    | 2200.197  | 29.162  | 21.0   |
| 18    | 2180.729  | 28.904  | 17.8   |
| 19    | 2161.260  | 28.646  | 10.0   |
| 20    | 1924.205  | 25.504  | 23.2   |
| 21    | 748.090   | 9.915   | 18.4   |

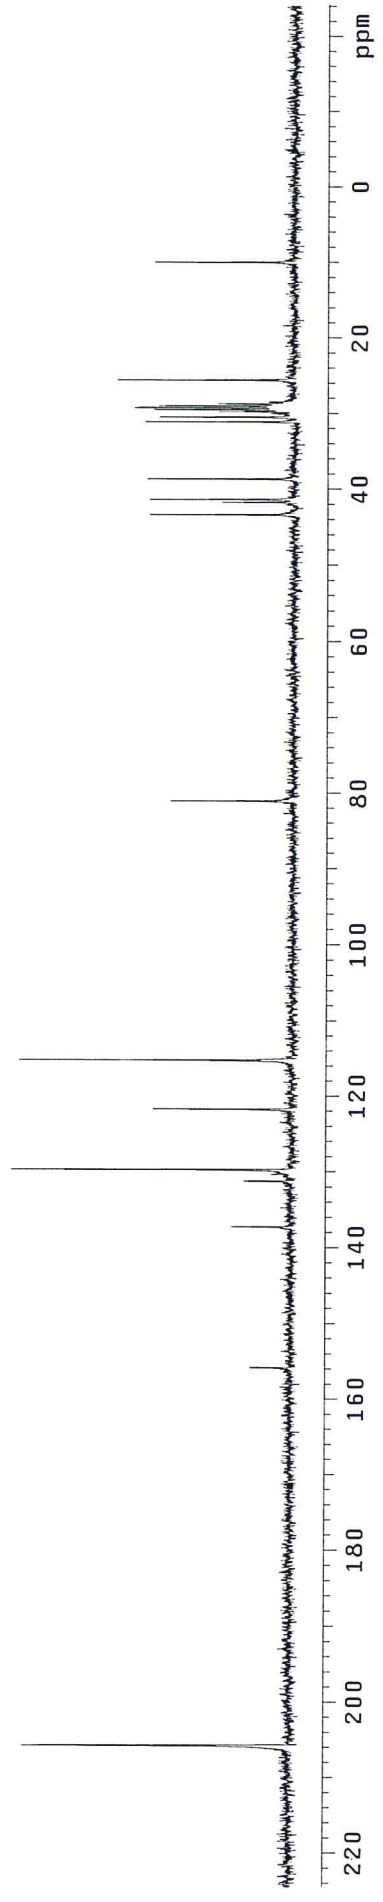

nb

MQ 1130  
C1177) in DMSO-d6

STANDARD 1H OBSERVE

```

exp1 stdih
SAMPLE DEC. & VT
date Sep 23 2008 dfrq 300.050
solvent DMSO dn H1
file exp dpwr 30
ACQUISITION exp dof 0
sfrq 300.050 dm nmn
tn H1 dmm c
at 1.998 dmf 200
np 17984 wtfile PROCESSING
sw 4500.5 wfile
fb 2600 proc ft
bs 16 fn not used
tpwr 49
pw 7.0 werr
dl 1.000 wexp
tof 0 wbs
nt 8 wnt
ct 8
alock n
gain not used
FLAGS n
i1 n
in n
dp y
SP DISPLAY -23.3
WD 2852.0
VS 45
SC 0
WC 250
hzmm 11.41
fs 3075.20
rf1 771.3
rfp 0
th 1
ins 1.000
nm cdc ph

```

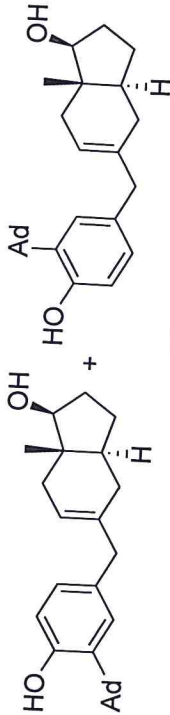

22

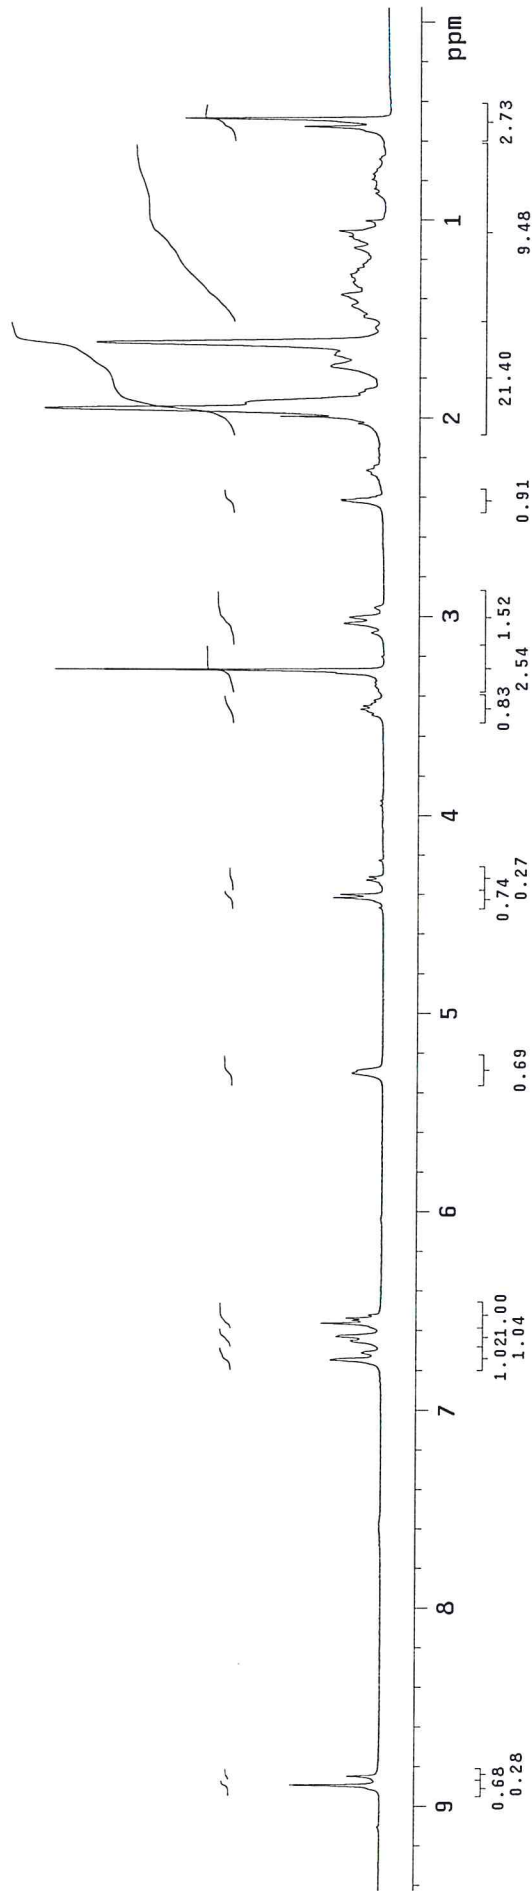

| INDEX | FREQUENCY | PPM     | HEIGHT |
|-------|-----------|---------|--------|
| 1     | 11672.100 | 154.705 | 7.1    |
| 2     | 11654.922 | 154.478 | 3.0    |
| 3     | 10363.142 | 137.356 | 7.4    |
| 4     | 10238.316 | 135.701 | 6.0    |
| 5     | 10226.864 | 135.550 | 2.6    |
| 6     | 9907.355  | 131.315 | 2.4    |
| 7     | 9835.207  | 130.359 | 7.1    |
| 8     | 9595.862  | 127.186 | 4.5    |
| 9     | 9568.377  | 126.822 | 8.0    |
| 10    | 9562.651  | 126.746 | 7.4    |
| 11    | 9200.769  | 121.950 | 7.2    |
| 12    | 8805.677  | 116.713 | 7.9    |
| 13    | 6067.517  | 80.421  | 8.2    |
| 14    | 3406.084  | 45.145  | 2.5    |
| 15    | 3308.742  | 43.855  | 5.7    |
| 16    | 3278.967  | 43.460  | 2.0    |
| 17    | 3258.354  | 43.187  | 4.7    |
| 18    | 3150.705  | 41.760  | 9.4    |
| 19    | 3114.059  | 41.275  | 8.9    |
| 20    | 3093.446  | 41.001  | 7.5    |
| 21    | 3072.832  | 40.728  | 22.0   |
| 22    | 3063.671  | 40.607  | 31.3   |
| 23    | 3052.219  | 40.455  | 42.7   |
| 24    | 3031.605  | 40.182  | 48.6   |
| 25    | 3010.992  | 39.909  | 40.3   |
| 26    | 2989.233  | 39.620  | 20.1   |
| 27    | 2968.619  | 39.347  | 7.1    |
| 28    | 2929.683  | 38.831  | 6.9    |
| 29    | 2814.018  | 37.298  | 27.6   |
| 30    | 2767.065  | 36.675  | 9.3    |
| 31    | 2456.717  | 32.562  | 1.8    |
| 32    | 2373.118  | 31.454  | 6.1    |
| 33    | 2314.713  | 30.680  | 7.7    |
| 34    | 2192.177  | 29.056  | 38.0   |
| 35    | 1949.396  | 25.838  | 7.8    |
| 36    | 833.976   | 11.054  | 4.0    |
| 37    | 820.234   | 10.872  | 11.1   |

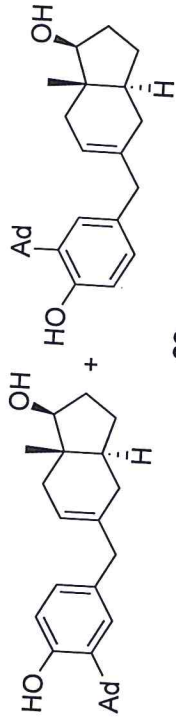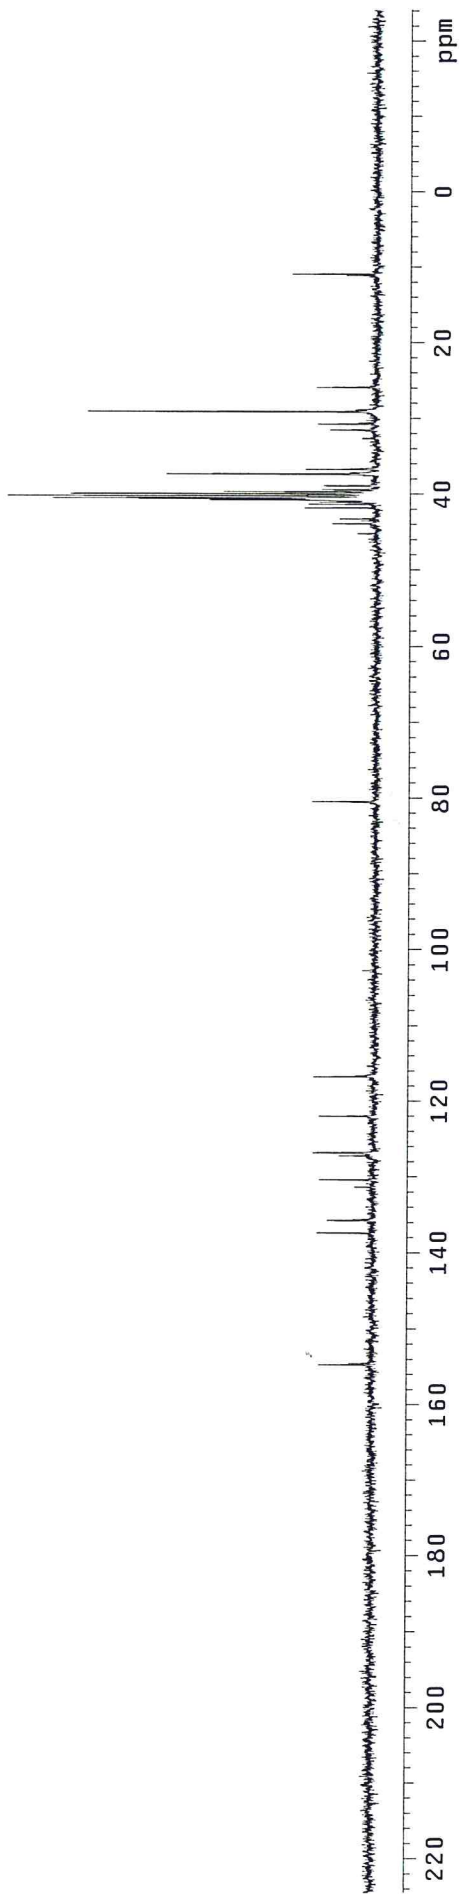

1151

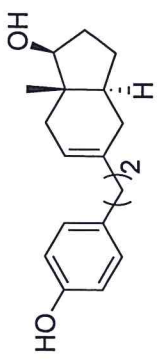

23

| INDEX | FREQUENCY PPM | HEIGHT | INDEX | FREQUENCY PPM | HEIGHT |
|-------|---------------|--------|-------|---------------|--------|
| 1     | 2181.345      | 7.270  | 40    | 518.571       | 1.728  |
| 2     | 2114.043      | 7.046  | 41    | 510.880       | 1.703  |
| 3     | 2105.802      | 7.018  | 42    | 501.540       | 1.672  |
| 4     | 2039.324      | 6.797  | 43    | 499.617       | 1.665  |
| 5     | 2031.083      | 6.769  | 44    | 490.552       | 1.635  |
| 6     | 1603.371      | 5.344  | 45    | 485.607       | 1.618  |
| 7     | 1599.800      | 5.332  | 46    | 480.113       | 1.600  |
| 8     | 1149.837      | 3.832  | 47    | 474.894       | 1.583  |
| 9     | 1141.322      | 3.804  | 48    | 472.696       | 1.575  |
| 10    | 1132.531      | 3.775  | 49    | 468.575       | 1.562  |
| 11    | 819.370       | 2.731  | 50    | 464.730       | 1.549  |
| 12    | 811.404       | 2.704  | 51    | 460.334       | 1.534  |
| 13    | 805.635       | 2.685  | 52    | 456.214       | 1.520  |
| 14    | 798.218       | 2.660  | 53    | 452.093       | 1.507  |
| 15    | 790.801       | 2.636  | 54    | 446.874       | 1.489  |
| 16    | 783.934       | 2.613  | 55    | 443.578       | 1.478  |
| 17    | 777.341       | 2.591  | 56    | 430.117       | 1.433  |
| 18    | 770.199       | 2.567  | 57    | 424.623       | 1.415  |
| 19    | 681.195       | 2.270  | 58    | 418.580       | 1.395  |
| 20    | 673.503       | 2.245  | 59    | 413.360       | 1.378  |
| 21    | 665.537       | 2.218  | 60    | 407.317       | 1.358  |
| 22    | 661.417       | 2.204  | 61    | 402.372       | 1.341  |
| 23    | 648.231       | 2.160  | 62    | 393.582       | 1.312  |
| 24    | 643.286       | 2.144  | 63    | 377.924       | 1.260  |
| 25    | 639.166       | 2.130  | 64    | 303.205       | 1.011  |
| 26    | 634.221       | 2.114  | 65    | 296.612       | 0.989  |
| 27    | 629.826       | 2.099  | 66    | 275.460       | 0.918  |
| 28    | 627.079       | 2.090  | 67    | 267.219       | 0.891  |
| 29    | 624.881       | 2.083  | 68    | 260.076       | 0.867  |
| 30    | 620.761       | 2.069  | 69    | 225.738       | 0.752  |
| 31    | 609.772       | 2.032  | 70    | 214.750       | 0.716  |
| 32    | 603.729       | 2.012  | 71    | 11.196        | 0.037  |
| 33    | 599.883       | 1.999  |       |               |        |
| 34    | 572.413       | 1.908  |       |               |        |
| 35    | 558.678       | 1.862  |       |               |        |
| 36    | 551.810       | 1.839  |       |               |        |
| 37    | 546.042       | 1.820  |       |               |        |
| 38    | 533.680       | 1.779  |       |               |        |
| 39    | 521.868       | 1.739  |       |               |        |

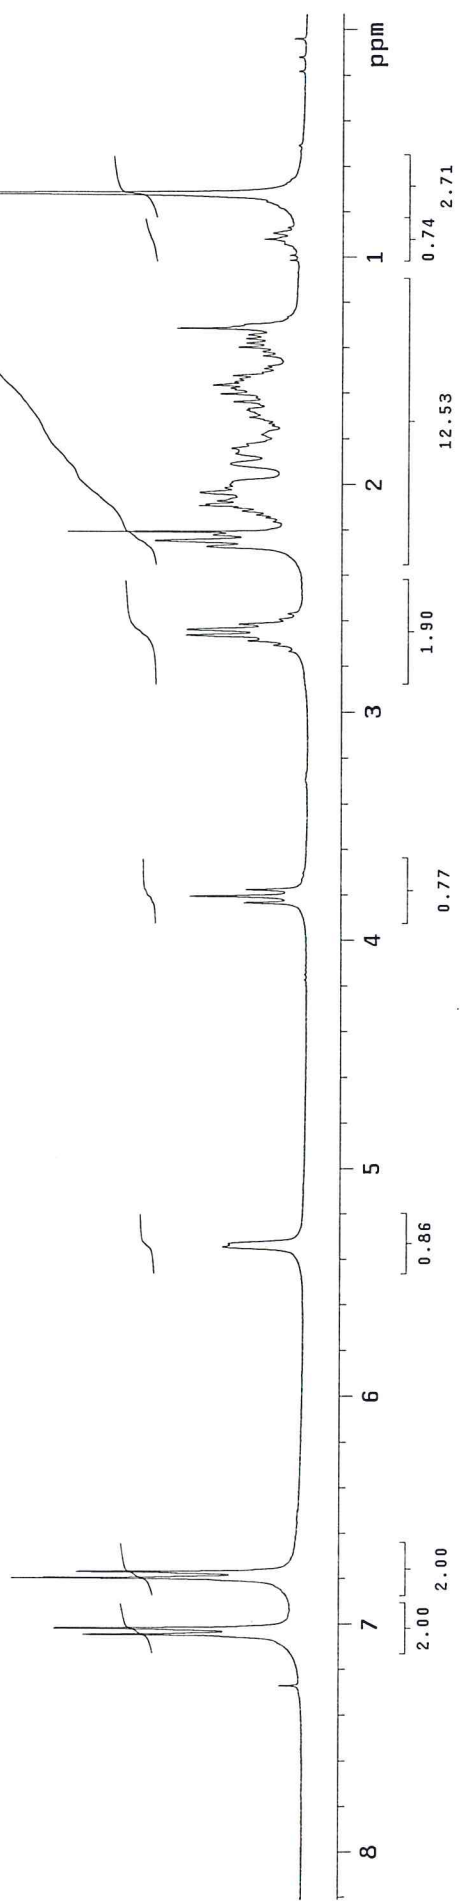

1151

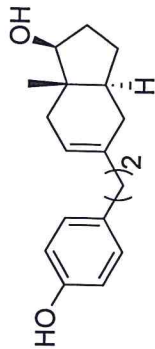

23

| INDEX | FREQUENCY | PPM     | HEIGHT |
|-------|-----------|---------|--------|
| 1     | 11622.602 | 154.050 | 11.4   |
| 2     | 10307.918 | 136.625 | 9.9    |
| 3     | 10126.977 | 134.226 | 10.1   |
| 4     | 9765.096  | 129.430 | 35.2   |
| 5     | 9091.721  | 120.505 | 14.0   |
| 6     | 8703.500  | 115.359 | 34.2   |
| 7     | 6196.669  | 82.133  | 14.9   |
| 8     | 5857.691  | 77.640  | 5.9    |
| 9     | 5825.626  | 77.215  | 6.6    |
| 10    | 5793.560  | 76.790  | 5.8    |
| 11    | 3138.999  | 41.605  | 11.9   |
| 12    | 3104.643  | 41.150  | 16.0   |
| 13    | 3003.866  | 39.814  | 13.0   |
| 14    | 2883.620  | 38.220  | 15.5   |
| 15    | 2553.804  | 33.849  | 18.6   |
| 16    | 2386.606  | 31.633  | 16.1   |
| 17    | 2305.297  | 30.555  | 14.0   |
| 18    | 1934.254  | 25.637  | 16.2   |
| 19    | 768.446   | 10.185  | 17.1   |

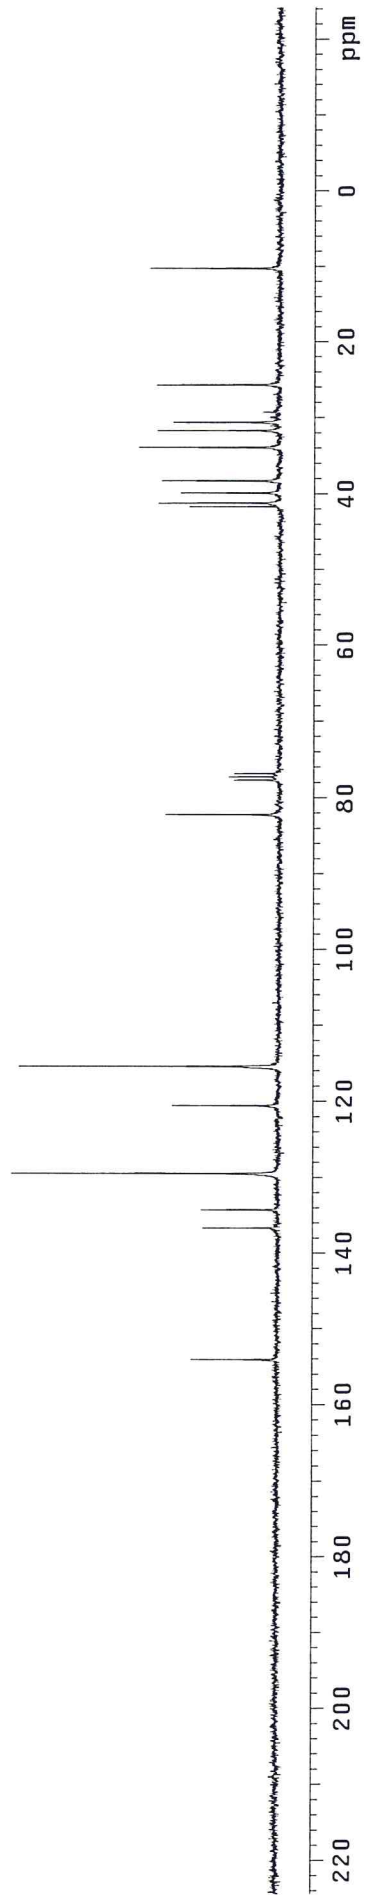

1153

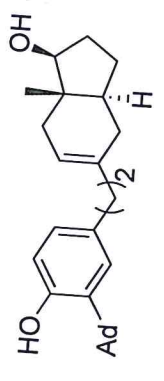

| INDEX | FREQUENCY PPM | HEIGHT | INDEX | FREQUENCY PPM | HEIGHT |
|-------|---------------|--------|-------|---------------|--------|
| 1     | 2659.187      | 8.863  | 40    | 424.482       | 1.415  |
| 2     | 2649.572      | 8.830  | 41    | 413.769       | 1.379  |
| 3     | 2022.426      | 6.740  | 42    | 406.077       | 1.353  |
| 4     | 2009.515      | 6.697  | 43    | 401.957       | 1.340  |
| 5     | 2000.176      | 6.666  | 44    | 393.441       | 1.311  |
| 6     | 1966.937      | 6.555  | 45    | 385.200       | 1.284  |
| 7     | 1958.970      | 6.529  | 46    | 381.079       | 1.270  |
| 8     | 1546.642      | 5.155  | 47    | 368.992       | 1.230  |
| 9     | 1542.796      | 5.142  | 48    | 349.489       | 1.165  |
| 10    | 1338.692      | 4.462  | 49    | 344.544       | 1.148  |
| 11    | 1322.210      | 4.407  | 50    | 332.182       | 1.107  |
| 12    | 1317.540      | 4.391  | 51    | 332.732       | 1.109  |
| 13    | 1125.798      | 3.752  | 52    | 325.040       | 1.083  |
| 14    | 1043.936      | 3.479  | 53    | 316.799       | 1.056  |
| 15    | 1035.695      | 3.452  | 54    | 259.112       | 0.864  |
| 16    | 1030.751      | 3.435  | 55    | 253.068       | 0.843  |
| 17    | 1022.235      | 3.407  | 56    | 230.268       | 0.767  |
| 18    | 989.545       | 3.298  | 57    | 222.301       | 0.741  |
| 19    | 980.205       | 3.267  | 58    | 200.050       | 0.667  |
| 20    | 867.028       | 2.890  | 59    | 147.582       | 0.492  |
| 21    | 743.687       | 2.479  | 60    | 138.242       | 0.461  |
| 22    | 735.995       | 2.453  |       |               |        |
| 23    | 727.479       | 2.425  |       |               |        |
| 24    | 723.359       | 2.411  |       |               |        |
| 25    | 721.710       | 2.405  |       |               |        |
| 26    | 624.740       | 2.082  |       |               |        |
| 27    | 617.598       | 2.058  |       |               |        |
| 28    | 608.258       | 2.027  |       |               |        |
| 29    | 597.820       | 1.992  |       |               |        |
| 30    | 587.106       | 1.957  |       |               |        |
| 31    | 575.843       | 1.919  |       |               |        |
| 32    | 550.846       | 1.836  |       |               |        |
| 33    | 536.561       | 1.788  |       |               |        |
| 34    | 524.199       | 1.747  |       |               |        |
| 35    | 515.134       | 1.717  |       |               |        |
| 36    | 499.751       | 1.666  |       |               |        |
| 37    | 486.290       | 1.621  |       |               |        |
| 38    | 445.909       | 1.486  |       |               |        |
| 39    | 435.470       | 1.451  |       |               |        |

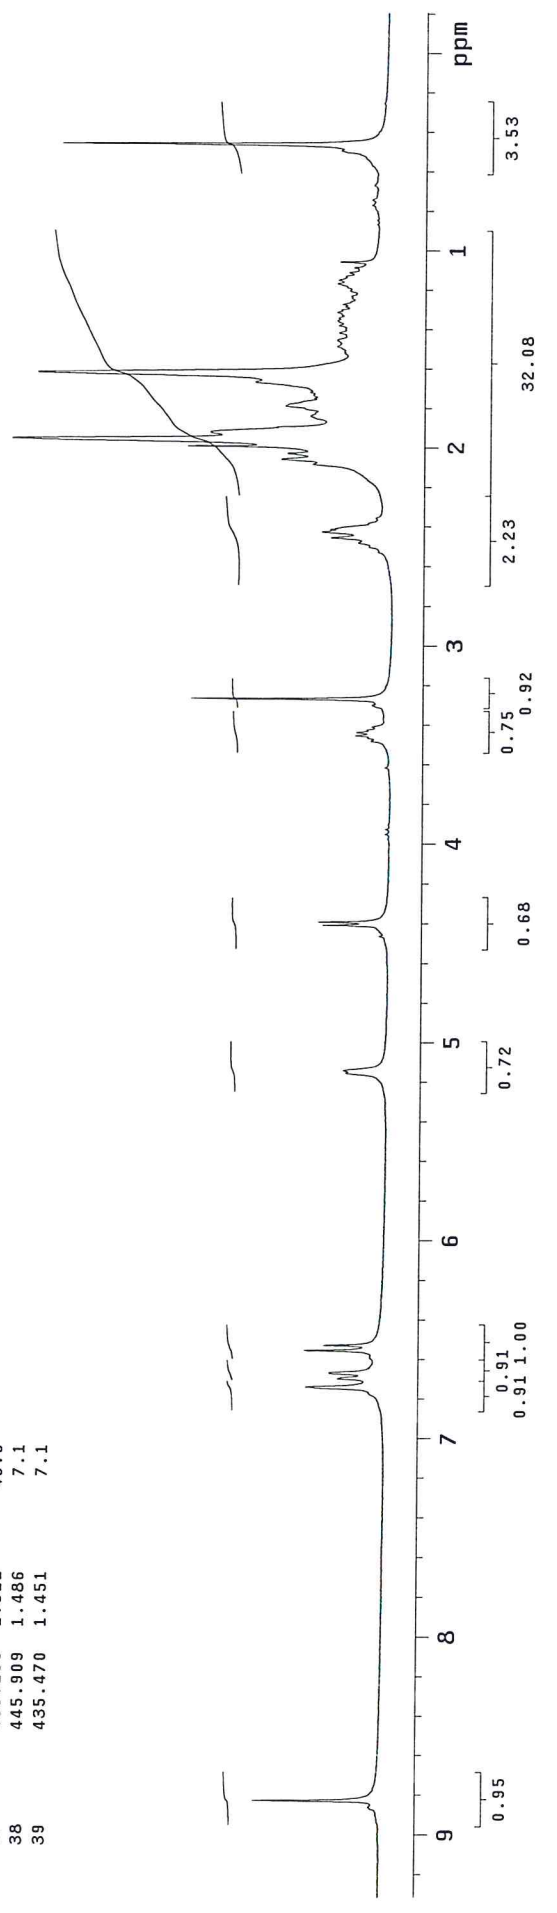



1153

| INDEX | FREQUENCY | PPM     | HEIGHT |
|-------|-----------|---------|--------|
| 1     | 11653.777 | 154.462 | 14.2   |
| 2     | 10320.770 | 136.794 | 11.1   |
| 3     | 10223.428 | 135.504 | 10.0   |
| 4     | 9978.357  | 132.256 | 12.6   |
| 5     | 9564.941  | 126.776 | 10.4   |
| 6     | 9538.602  | 126.427 | 10.6   |
| 7     | 9138.929  | 121.130 | 9.8    |
| 8     | 8810.258  | 116.774 | 10.4   |
| 9     | 6077.823  | 80.557  | 12.0   |
| 10    | 3144.979  | 41.684  | 17.0   |
| 11    | 3115.204  | 41.290  | 15.1   |
| 12    | 3093.446  | 41.001  | 10.3   |
| 13    | 3072.832  | 40.728  | 29.4   |
| 14    | 3061.380  | 40.576  | 45.2   |
| 15    | 3052.219  | 40.455  | 47.6   |
| 16    | 3031.605  | 40.182  | 53.0   |
| 17    | 3009.846  | 39.893  | 41.4   |
| 18    | 2989.233  | 39.620  | 21.4   |
| 19    | 2968.619  | 39.347  | 6.9    |
| 20    | 2927.392  | 38.800  | 12.9   |
| 21    | 2817.454  | 37.343  | 32.3   |
| 22    | 2764.775  | 36.645  | 17.1   |
| 23    | 2578.108  | 34.171  | 12.8   |
| 24    | 2400.603  | 31.818  | 12.3   |
| 25    | 2314.713  | 30.680  | 12.0   |
| 26    | 2195.613  | 29.101  | 42.3   |
| 27    | 1955.122  | 25.914  | 11.7   |
| 28    | 825.960   | 10.948  | 17.2   |

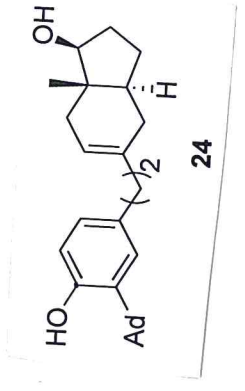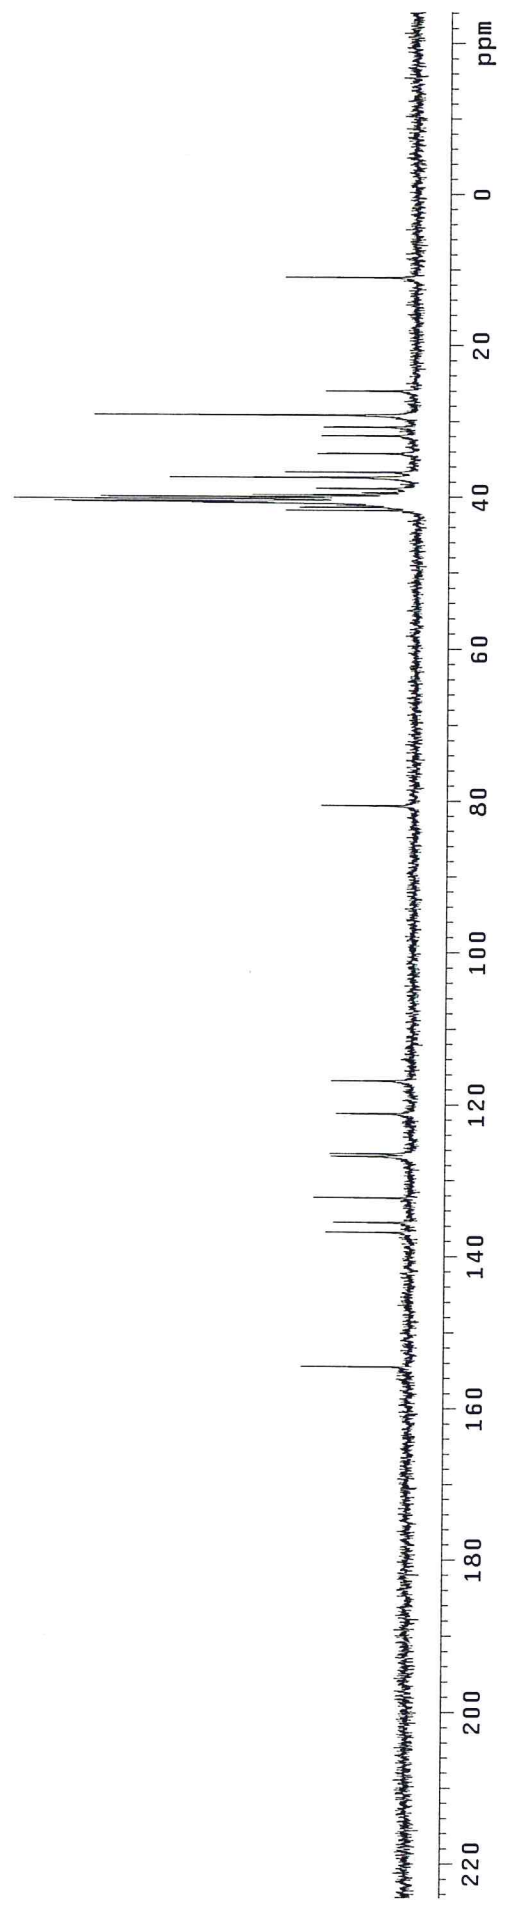

1169

| INDEX | FREQUENCY | PPM   | HEIGHT |
|-------|-----------|-------|--------|
| 1     | 2652.044  | 8.839 | 31.1   |
| 2     | 2020.504  | 6.734 | 21.2   |
| 3     | 2008.966  | 6.695 | 14.4   |
| 4     | 2001.000  | 6.669 | 16.4   |
| 5     | 1917.765  | 6.392 | 13.4   |
| 6     | 1909.798  | 6.365 | 11.3   |
| 7     | 1328.253  | 4.427 | 16.3   |
| 8     | 1324.133  | 4.413 | 16.8   |
| 9     | 1048.881  | 3.496 | 7.8    |
| 10    | 1043.936  | 3.479 | 7.9    |
| 11    | 993.941   | 3.313 | 14.8   |
| 12    | 733.797   | 2.446 | 21.1   |
| 13    | 525.298   | 1.751 | 8.3    |
| 14    | 515.134   | 1.717 | 14.3   |
| 15    | 514.310   | 1.714 | 14.4   |
| 16    | 503.047   | 1.677 | 7.6    |
| 17    | 493.433   | 1.645 | 5.3    |
| 18    | 480.247   | 1.601 | 10.4   |
| 19    | 467.061   | 1.557 | 10.2   |
| 20    | 456.348   | 1.521 | 14.3   |
| 21    | 441.239   | 1.471 | 29.8   |
| 22    | 430.251   | 1.434 | 19.2   |
| 23    | 409.923   | 1.366 | 12.6   |
| 24    | 395.639   | 1.319 | 17.6   |
| 25    | 379.156   | 1.264 | 18.0   |
| 26    | 366.795   | 1.222 | 12.5   |
| 27    | 357.730   | 1.192 | 9.9    |
| 28    | 345.917   | 1.153 | 14.3   |
| 29    | 335.204   | 1.117 | 10.3   |
| 30    | 318.997   | 1.063 | 4.0    |
| 31    | 225.873   | 0.753 | 81.1   |

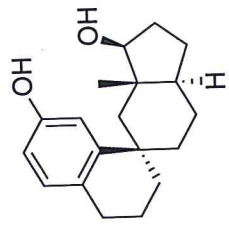

25

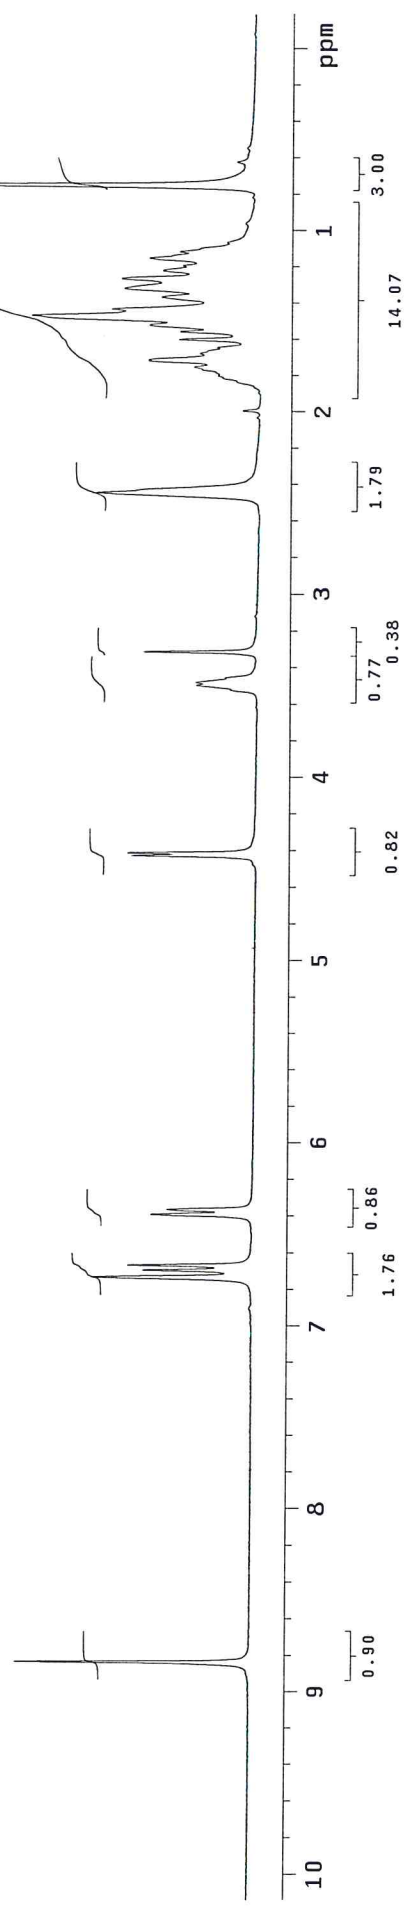

1169

| INDEX | FREQUENCY | PPM     | HEIGHT |
|-------|-----------|---------|--------|
| 1     | 12119.843 | 160.641 | 21.7   |
| 2     | 11488.841 | 152.277 | 15.2   |
| 3     | 10162.705 | 134.700 | 20.5   |
| 4     | 9984.055  | 132.332 | 21.6   |
| 5     | 8948.799  | 118.610 | 22.5   |
| 6     | 8915.588  | 118.170 | 19.2   |
| 7     | 6430.516  | 85.232  | 19.8   |
| 8     | 3613.336  | 47.892  | 28.9   |
| 9     | 3430.105  | 45.464  | 13.6   |
| 10    | 3409.492  | 45.191  | 39.9   |
| 11    | 3387.733  | 44.902  | 29.2   |
| 12    | 3367.120  | 44.629  | 25.3   |
| 13    | 3357.958  | 44.508  | 21.3   |
| 14    | 3346.506  | 44.356  | 11.9   |
| 15    | 3277.794  | 43.445  | 27.9   |
| 16    | 3002.948  | 39.802  | 15.7   |
| 17    | 2901.025  | 38.451  | 16.6   |
| 18    | 2864.379  | 37.965  | 17.6   |
| 19    | 2653.663  | 35.173  | 17.3   |
| 20    | 2646.792  | 35.081  | 17.5   |
| 21    | 2326.137  | 30.831  | 16.6   |
| 22    | 1869.205  | 24.775  | 18.8   |
| 23    | 1171.781  | 15.531  | 18.7   |

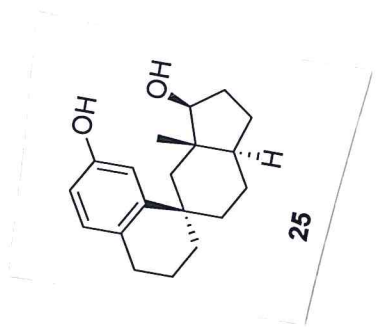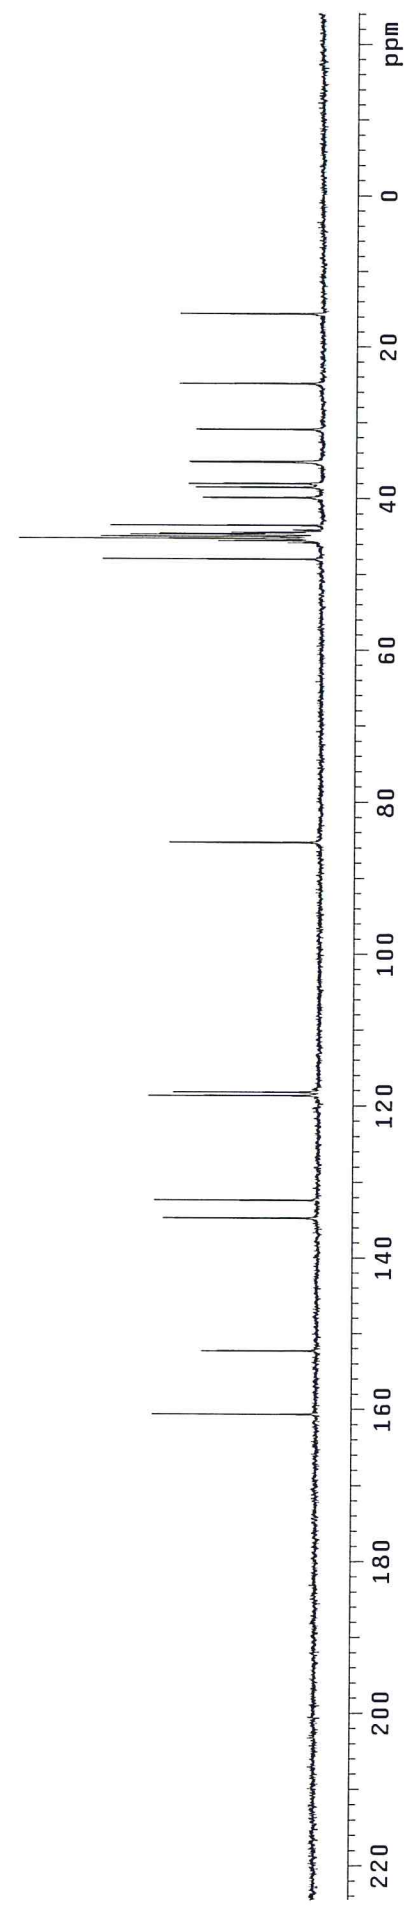

| INDEX | FREQUENCY | PPM   | HEIGHT | INDEX | FREQUENCY | PPM   | HEIGHT | INDEX | FREQUENCY | PPM | HEIGHT |
|-------|-----------|-------|--------|-------|-----------|-------|--------|-------|-----------|-----|--------|
| 1     | 2350.225  | 7.833 | 18.5   | 40    | 564.659   | 1.892 | 3.8    |       |           |     |        |
| 2     | 2049.701  | 6.831 | 16.8   | 41    | 559.165   | 1.864 | 3.5    |       |           |     |        |
| 3     | 2003.551  | 6.677 | 14.6   | 42    | 555.045   | 1.850 | 3.9    |       |           |     |        |
| 4     | 1100.329  | 3.667 | 3.0    | 43    | 545.156   | 1.817 | 6.0    |       |           |     |        |
| 5     | 1092.088  | 3.640 | 4.9    | 44    | 540.760   | 1.802 | 7.4    |       |           |     |        |
| 6     | 1084.122  | 3.613 | 10.1   | 45    | 536.640   | 1.789 | 5.6    |       |           |     |        |
| 7     | 1079.726  | 3.598 | 3.4    | 46    | 531.146   | 1.770 | 6.5    |       |           |     |        |
| 8     | 861.063   | 2.870 | 21.0   | 47    | 526.750   | 1.756 | 7.5    |       |           |     |        |
| 9     | 753.929   | 2.513 | 9.5    | 48    | 514.114   | 1.713 | 34.3   |       |           |     |        |
| 10    | 748.161   | 2.493 | 5.6    | 49    | 511.367   | 1.704 | 44.2   |       |           |     |        |
| 11    | 623.171   | 2.077 | 44.6   | 50    | 494.061   | 1.647 | 8.6    |       |           |     |        |
| 12    | 620.424   | 2.068 | 45.3   | 51    | 489.666   | 1.632 | 4.4    |       |           |     |        |
| 13    | 613.007   | 2.043 | 3.9    | 52    | 480.326   | 1.601 | 10.1   |       |           |     |        |
| 14    | 612.458   | 2.041 | 4.0    | 53    | 478.128   | 1.593 | 8.9    |       |           |     |        |
| 15    | 610.535   | 2.035 | 4.6    | 54    | 469.338   | 1.564 | 14.1   |       |           |     |        |
| 16    | 609.985   | 2.033 | 4.8    | 55    | 467.140   | 1.557 | 12.9   |       |           |     |        |
| 17    | 609.436   | 2.031 | 5.0    | 56    | 464.942   | 1.550 | 14.1   |       |           |     |        |
| 18    | 608.062   | 2.027 | 7.8    | 57    | 458.624   | 1.528 | 7.3    |       |           |     |        |
| 19    | 607.513   | 2.025 | 7.6    | 58    | 453.954   | 1.513 | 7.4    |       |           |     |        |
| 20    | 606.964   | 2.023 | 7.4    | 59    | 446.263   | 1.487 | 3.6    |       |           |     |        |
| 21    | 606.414   | 2.021 | 7.3    | 60    | 429.231   | 1.431 | 8.0    |       |           |     |        |
| 22    | 604.766   | 2.016 | 58.6   | 61    | 423.462   | 1.411 | 7.7    |       |           |     |        |
| 23    | 604.217   | 2.014 | 13.0   | 62    | 419.616   | 1.398 | 7.6    |       |           |     |        |
| 24    | 603.667   | 2.012 | 9.4    | 63    | 417.144   | 1.390 | 8.8    |       |           |     |        |
| 25    | 603.118   | 2.010 | 6.5    | 64    | 414.397   | 1.381 | 8.1    |       |           |     |        |
| 26    | 602.294   | 2.007 | 5.8    | 65    | 411.375   | 1.371 | 6.9    |       |           |     |        |
| 27    | 601.744   | 2.005 | 6.3    | 66    | 406.705   | 1.355 | 4.7    |       |           |     |        |
| 28    | 601.195   | 2.004 | 6.1    | 67    | 403.409   | 1.344 | 5.0    |       |           |     |        |
| 29    | 600.645   | 2.002 | 5.8    | 68    | 401.211   | 1.337 | 6.3    |       |           |     |        |
| 30    | 598.448   | 1.994 | 9.5    | 69    | 386.927   | 1.290 | 7.4    |       |           |     |        |
| 31    | 596.250   | 1.987 | 14.9   | 70    | 377.312   | 1.258 | 6.8    |       |           |     |        |
| 32    | 594.053   | 1.980 | 20.6   | 71    | 373.192   | 1.244 | 6.3    |       |           |     |        |
| 33    | 591.855   | 1.973 | 20.6   | 72    | 370.719   | 1.236 | 5.7    |       |           |     |        |
| 34    | 589.657   | 1.965 | 19.2   | 73    | 364.401   | 1.214 | 7.1    |       |           |     |        |
| 35    | 587.734   | 1.959 | 17.0   | 74    | 358.907   | 1.196 | 4.0    |       |           |     |        |
| 36    | 573.725   | 1.912 | 4.2    | 75    | 352.589   | 1.175 | 3.2    |       |           |     |        |
| 37    | 569.879   | 1.899 | 4.9    | 76    | 344.623   | 1.149 | 2.4    |       |           |     |        |
| 38    | 567.406   | 1.891 | 6.9    | 77    | 337.480   | 1.125 | 3.4    |       |           |     |        |
| 39    | 565.758   | 1.886 | 3.4    | 78    | 250.674   | 0.835 | 58.7   |       |           |     |        |

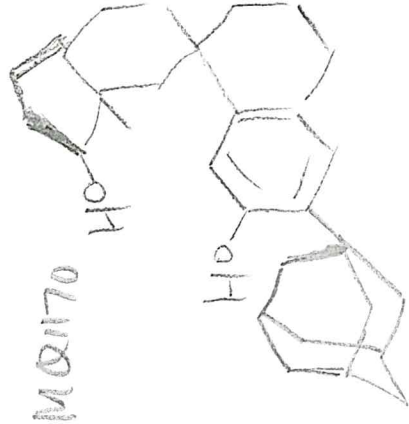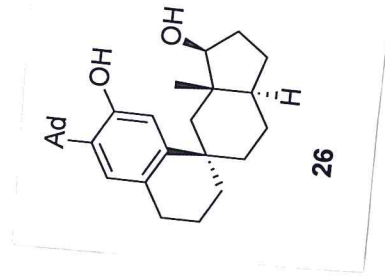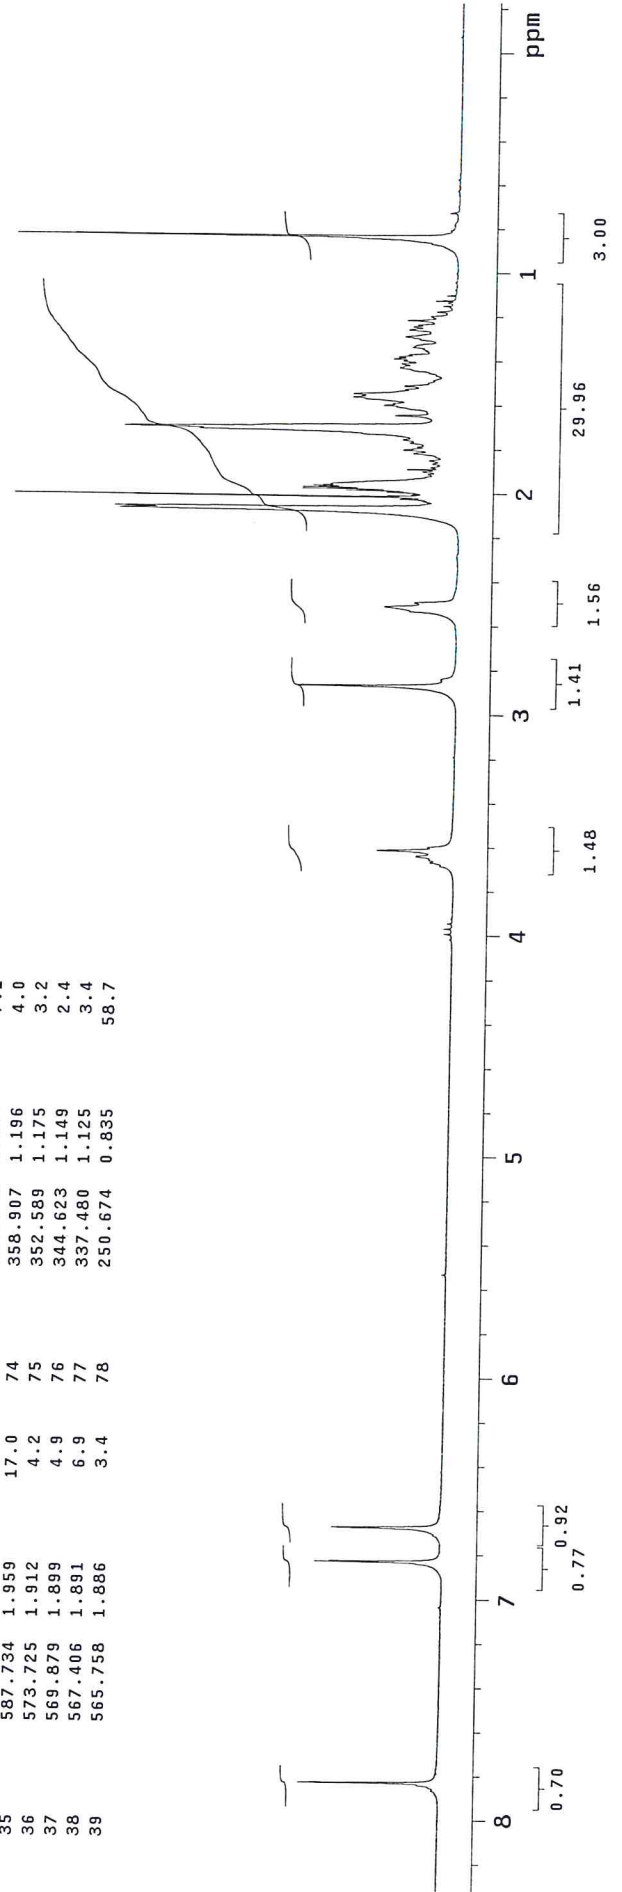

| INDEX | FREQUENCY PPM | HEIGHT  |
|-------|---------------|---------|
| 1     | 15501.634     | 205.463 |
| 2     | 11628.586     | 154.128 |
| 3     | 9625.640      | 127.581 |
| 4     | 9559.219      | 126.700 |
| 5     | 8663.676      | 114.831 |
| 6     | 6107.602      | 80.952  |
| 7     | 3248.050      | 43.051  |
| 8     | 3064.819      | 40.622  |
| 9     | 3030.463      | 40.167  |
| 10    | 3005.269      | 39.833  |
| 11    | 2870.136      | 38.042  |
| 12    | 2804.860      | 37.176  |
| 13    | 2732.713      | 36.220  |
| 14    | 2623.919      | 34.778  |
| 15    | 2527.723      | 33.503  |
| 16    | 2504.819      | 33.200  |
| 17    | 2290.667      | 30.361  |
| 18    | 2275.780      | 30.164  |
| 19    | 2252.876      | 29.860  |
| 20    | 2233.408      | 29.602  |
| 21    | 2213.939      | 29.344  |
| 22    | 2211.649      | 29.314  |
| 23    | 2195.616      | 29.101  |
| 24    | 2176.148      | 28.843  |
| 25    | 2156.680      | 28.585  |
| 26    | 2137.211      | 28.327  |
| 27    | 1945.964      | 25.792  |
| 28    | 1510.790      | 20.024  |
| 29    | 737.783       | 9.779   |

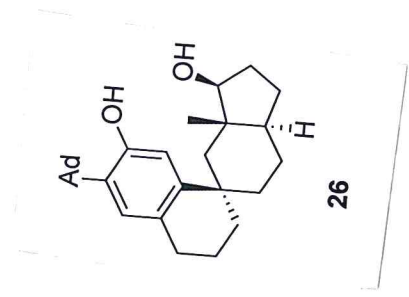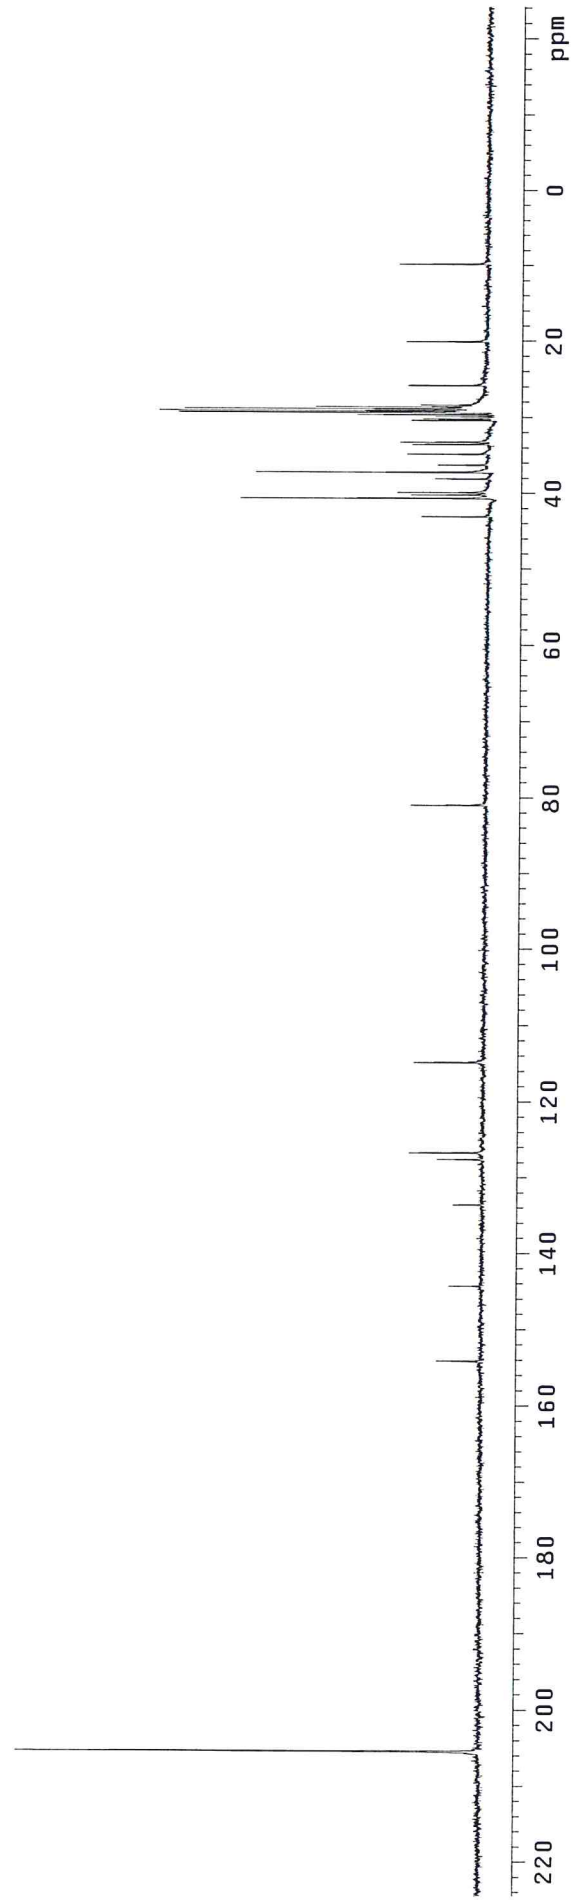

Supplement: NIHMS819451-supplement-Supplementary_Information.pdf [file NIHMS819451-supplement-Supplementary_Information.pdf]
